# Supplementary material for: Unveiling of free carrier transport and ion migration in a 2D–3D perovskite mixture for stable optoelectronic devices
Source: Royal Society of Chemistry journal article supplement (doi:10.1039/d5nr00992h), 2025-01-01
Supplement: d5nr00992h2.xlsx [file d5nr00992h2.xlsx]

## Sheet: 2D-3D passivation
	300K		290K		280K		270K		260K		250K		240K		230K		220K		210K
-0.59991	-1.46532	-0.59991	-1.36404	-0.59992	-1.18837	-0.59992	-1.0339	-0.59992	-0.87973	-0.5999	-0.72817	-0.5999	-0.67327	-0.5999	-0.57343	-0.5999	-0.44987	-0.59991	-0.39039
-0.5499	-1.23562	-0.5499	-1.14933	-0.54991	-1.00723	-0.54991	-0.87709	-0.54991	-0.75318	-0.54989	-0.64319	-0.54989	-0.57927	-0.5899	-0.55831	-0.5899	-0.43549	-0.58989	-0.39195
-0.49991	-1.03621	-0.49991	-0.95981	-0.49992	-0.84875	-0.49991	-0.73893	-0.49992	-0.63715	-0.4999	-0.5443	-0.4999	-0.49478	-0.57989	-0.5431	-0.57989	-0.42506	-0.57989	-0.38315
-0.44993	-0.85848	-0.44994	-0.79248	-0.44994	-0.70642	-0.44994	-0.61668	-0.44993	-0.53248	-0.44992	-0.46409	-0.44992	-0.41546	-0.56989	-0.52854	-0.56989	-0.41495	-0.5699	-0.36364
-0.39993	-0.70019	-0.39994	-0.64512	-0.39994	-0.5806	-0.39994	-0.50541	-0.39994	-0.43951	-0.39992	-0.38169	-0.39992	-0.34709	-0.55989	-0.51242	-0.55989	-0.40127	-0.55988	-0.34971
-0.34992	-0.55726	-0.34993	-0.51439	-0.34993	-0.46592	-0.34993	-0.40654	-0.34993	-0.35785	-0.34992	-0.31192	-0.34991	-0.28533	-0.54989	-0.49668	-0.54989	-0.39156	-0.54989	-0.32931
-0.29992	-0.43177	-0.29993	-0.39956	-0.29993	-0.36676	-0.29993	-0.31981	-0.29993	-0.28505	-0.29992	-0.24899	-0.29992	-0.22911	-0.53988	-0.48295	-0.53989	-0.3796	-0.53989	-0.30439
-0.24989	-0.3245	-0.2499	-0.29964	-0.2499	-0.27806	-0.24989	-0.24378	-0.2499	-0.22054	-0.24988	-0.19323	-0.24988	-0.17905	-0.52989	-0.46563	-0.52989	-0.37082	-0.52988	-0.30132
-0.1999	-0.23289	-0.19991	-0.21474	-0.19991	-0.20324	-0.19991	-0.17787	-0.19991	-0.16335	-0.1999	-0.14469	-0.1999	-0.13459	-0.51989	-0.4517	-0.51989	-0.35987	-0.5199	-0.2936
-0.14993	-0.15663	-0.14993	-0.14397	-0.14993	-0.13901	-0.14993	-0.12141	-0.14993	-0.11423	-0.14993	-0.10196	-0.14993	-0.09502	-0.50989	-0.4377	-0.50989	-0.34818	-0.50989	-0.29599
-0.09993	-0.09391	-0.09993	-0.08619	-0.09994	-0.08475	-0.09993	-0.07457	-0.09993	-0.07128	-0.09992	-0.06418	-0.09992	-0.06048	-0.49989	-0.42346	-0.49989	-0.33954	-0.4999	-0.27653
-0.04993	-0.04343	-0.04993	-0.03974	-0.04993	-0.03966	-0.04993	-0.03505	-0.04993	-0.03405	-0.04992	-0.03077	-0.04992	-0.02945	-0.4899	-0.41002	-0.4899	-0.32972	-0.48988	-0.28909
9.09319e-05	0.00116	8.62138e-05	0.00116	8.70169e-05	0.000998207	9.08315e-05	0.000871826	9.45458e-05	0.000727454	0.00010478	0.000624742	9.65487e-05	0.000122759	-0.4799	-0.3954	-0.4799	-0.31893	-0.4799	-0.28052
0.0501	0.04407	0.0501	0.04105	0.05009	0.04047	0.0501	0.03578	0.05009	0.0342	0.0501	0.03109	0.0501	0.02968	-0.46991	-0.38442	-0.46991	-0.31048	-0.46991	-0.2453
0.10011	0.09367	0.1001	0.0869	0.1001	0.08514	0.1001	0.07575	0.1001	0.07251	0.1001	0.06589	0.1001	0.06241	-0.45991	-0.36976	-0.45991	-0.30055	-0.45991	-0.23098
0.1501	0.15062	0.15011	0.14205	0.15011	0.13782	0.1501	0.12252	0.1501	0.11608	0.15011	0.10546	0.15011	0.09954	-0.44992	-0.35709	-0.44992	-0.29166	-0.44991	-0.22467
0.20011	0.22153	0.2001	0.20875	0.2001	0.19885	0.2001	0.17746	0.2001	0.16536	0.20011	0.15008	0.20012	0.1419	-0.43992	-0.34412	-0.43992	-0.28095	-0.43992	-0.21596
0.25009	0.30483	0.25009	0.28799	0.25008	0.26986	0.25008	0.24248	0.25008	0.22307	0.25009	0.20237	0.25009	0.18852	-0.42992	-0.33206	-0.42992	-0.27134	-0.42992	-0.20837
0.30009	0.40172	0.30009	0.38203	0.30008	0.35221	0.30009	0.31735	0.30008	0.28883	0.30009	0.26182	0.30009	0.24286	-0.41992	-0.32023	-0.41992	-0.2623	-0.41992	-0.20137
0.35009	0.51399	0.35008	0.49049	0.35008	0.44643	0.35008	0.40422	0.35008	0.36255	0.35008	0.32726	0.35008	0.30429	-0.40992	-0.30887	-0.40992	-0.25353	-0.40992	-0.19588
0.40012	0.6383	0.40012	0.61306	0.40012	0.5515	0.40012	0.50064	0.40012	0.44411	0.40012	0.40282	0.40012	0.37208	-0.39992	-0.29696	-0.39992	-0.24668	-0.39992	-0.20407
0.45012	0.77741	0.45012	0.74829	0.45011	0.66832	0.45012	0.6074	0.45011	0.53414	0.45012	0.48453	0.45012	0.4469	-0.38992	-0.28748	-0.38992	-0.23782	-0.38992	-0.20755
0.50009	0.92556	0.50009	0.89511	0.50009	0.79289	0.50009	0.72429	0.50009	0.63416	0.50009	0.57372	0.50009	0.52971	-0.37992	-0.2769	-0.37992	-0.22958	-0.37991	-0.20108
0.55009	1.08378	0.55009	1.05337	0.55008	0.92724	0.55008	0.85114	0.55008	0.74021	0.55008	0.67187	0.55008	0.61924	-0.36992	-0.26584	-0.36992	-0.22104	-0.36991	-0.19668
0.60013	1.2511	0.60013	1.22016	0.60013	1.07001	0.60013	0.98659	0.60012	0.85517	0.60012	0.77776	0.60012	0.71664	-0.35991	-0.25589	-0.35991	-0.21276	-0.35991	-0.18574
0.65013	1.42433	0.65013	1.39417	0.65012	1.21963	0.65012	1.12958	0.65012	0.9819	0.65012	0.88979	0.65012	0.82061	-0.34991	-0.24484	-0.34991	-0.20455	-0.34991	-0.17343
0.70012	1.58372	0.70012	1.55802	0.70013	1.38103	0.70013	1.28474	0.70012	1.11169	0.70012	1.01122	0.70012	0.93526	-0.33991	-0.23468	-0.33991	-0.19658	-0.3399	-0.16973
0.75009	1.76993	0.75009	1.74856	0.75009	1.53214	0.75009	1.43003	0.7501	1.25179	0.7501	1.14237	0.7501	1.05388	-0.32992	-0.22535	-0.32992	-0.18881	-0.32992	-0.15854
0.80011	1.96115	0.80011	1.94725	0.80011	1.70843	0.80011	1.6013	0.80012	1.39777	0.80012	1.28437	0.80012	1.18409	-0.31992	-0.21618	-0.31992	-0.18126	-0.31992	-0.15392
0.85011	2.16812	0.85011	2.15211	0.85011	1.89107	0.85011	1.77873	0.85011	1.54067	0.85012	1.42748	0.85012	1.32298	-0.30992	-0.20719	-0.30992	-0.17494	-0.30992	-0.1456
0.90011	2.37465	0.90011	2.36303	0.90011	2.08298	0.90011	1.96661	0.90011	1.70555	0.9001	1.5738	0.9001	1.4672	-0.29991	-0.19883	-0.29991	-0.1676	-0.29991	-0.14345
0.95011	2.59171	0.95011	2.57947	0.95011	2.28298	0.95011	2.16024	0.95011	1.87827	0.95011	1.73222	0.95011	1.62658	-0.28991	-0.18906	-0.28991	-0.16095	-0.28991	-0.13535
1.00015	2.81382	1.00015	2.8057	1.00015	2.48757	1.00015	2.36064	1.00015	2.06185	1.00014	1.90439	1.00014	1.79465	-0.27991	-0.18078	-0.27991	-0.15409	-0.27991	-0.13009
1.05013	3.0561	1.05013	3.03558	1.05013	2.69785	1.05013	2.57115	1.05013	2.25342	1.05012	2.08709	1.05012	1.97842	-0.26991	-0.17233	-0.26991	-0.14709	-0.26991	-0.1292
1.10012	3.28434	1.10013	3.29154	1.10012	2.92227	1.10012	2.78625	1.10012	2.45386	1.10012	2.27985	1.10012	2.16652	-0.25991	-0.16412	-0.25991	-0.14008	-0.25991	-0.12163
1.15016	3.54267	1.15016	3.53703	1.15016	3.14825	1.15016	3.0223	1.15016	2.67461	1.15016	2.4772	1.15016	2.3633	-0.24988	-0.15595	-0.24988	-0.1336	-0.24988	-0.11649
1.20016	3.81044	1.20016	3.80056	1.20016	3.38308	1.20016	3.24714	1.20016	2.89581	1.20015	2.69053	1.20015	2.57694	-0.23988	-0.14832	-0.23989	-0.12712	-0.23988	-0.11201
1.25015	4.07753	1.25016	4.08102	1.25016	3.63833	1.25016	3.48773	1.25016	3.11701	1.25015	2.91223	1.25015	2.80159	-0.22989	-0.14016	-0.22989	-0.12053	-0.2299	-0.10527
1.30013	4.35511	1.30013	4.36712	1.30013	3.90669	1.30013	3.74543	1.30013	3.36061	1.30012	3.12763	1.30012	3.03716	-0.21989	-0.13274	-0.21989	-0.11499	-0.21989	-0.09947
1.30013	4.33189	1.30013	4.31995	1.30013	3.86653	1.30013	3.71732	1.30013	3.34056	1.30012	3.07666	1.30012	3.01351	-0.20989	-0.12525	-0.2099	-0.10867	-0.20991	-0.09431
1.25015	3.99241	1.25016	3.99059	1.25016	3.54585	1.25016	3.39888	1.25016	3.05418	1.25015	2.7909	1.25015	2.72705	-0.1999	-0.11806	-0.1999	-0.10266	-0.1999	-0.09061
1.20016	3.67832	1.20016	3.67014	1.20016	3.25987	1.20016	3.11806	1.20016	2.7795	1.20015	2.57701	1.20015	2.48006	-0.18992	-0.1109	-0.18992	-0.09657	-0.18991	-0.08525
1.15016	3.39141	1.15016	3.36734	1.15016	2.99251	1.15016	2.84441	1.15016	2.53446	1.15016	2.34151	1.15015	2.24931	-0.17992	-0.10428	-0.17992	-0.09108	-0.17991	-0.08015
1.10012	3.12022	1.10012	3.08789	1.10012	2.73669	1.10012	2.59457	1.10012	2.30837	1.10012	2.12556	1.10012	2.03659	-0.16992	-0.09734	-0.16992	-0.08535	-0.16992	-0.07686
1.05013	2.86283	1.05013	2.82938	1.05013	2.5057	1.05013	2.35629	1.05013	2.10015	1.05012	1.92682	1.05012	1.83967	-0.15992	-0.09096	-0.15992	-0.07971	-0.15992	-0.07202
1.00015	2.61485	1.00015	2.57524	1.00015	2.27912	1.00015	2.14167	1.00015	1.89723	1.00014	1.74463	1.00014	1.66146	-0.14993	-0.08462	-0.14992	-0.07436	-0.14992	-0.06734
0.95011	2.38001	0.95011	2.34394	0.95011	2.07285	0.95011	1.93864	0.95011	1.71838	0.95011	1.57682	0.95011	1.49135	-0.13993	-0.07827	-0.13993	-0.06888	-0.13993	-0.06297
0.90011	2.15687	0.90011	2.12409	0.90011	1.87405	0.90011	1.75138	0.90011	1.54532	0.9001	1.41713	0.9001	1.33754	-0.12992	-0.07196	-0.12993	-0.0638	-0.12993	-0.05676
0.85011	1.95365	0.85011	1.91346	0.85011	1.69407	0.85011	1.57599	0.85011	1.38963	0.85011	1.2687	0.85011	1.19042	-0.11992	-0.06594	-0.11992	-0.05849	-0.11992	-0.05217
0.80011	1.75922	0.80011	1.72039	0.80011	1.5202	0.80011	1.40697	0.80011	1.24031	0.80011	1.12597	0.80012	1.0618	-0.10992	-0.0599	-0.10992	-0.05334	-0.10992	-0.0479
0.75009	1.57652	0.75009	1.53767	0.75009	1.35729	0.7501	1.25161	0.7501	1.09946	0.7501	0.98283	0.7501	0.93962	-0.09992	-0.05407	-0.09992	-0.04832	-0.09992	-0.04241
0.70012	1.40488	0.70012	1.36838	0.70011	1.20235	0.70013	1.10809	0.70012	0.96993	0.70012	0.89325	0.70012	0.82593	-0.08992	-0.04834	-0.08992	-0.04342	-0.08992	-0.03873
0.65012	1.24093	0.65011	1.20435	0.65012	1.05997	0.65012	0.97152	0.65012	0.85258	0.65012	0.77698	0.65012	0.72033	-0.07991	-0.04307	-0.07991	-0.03838	-0.07991	-0.03479
0.60013	1.09138	0.60013	1.05344	0.60012	0.92291	0.60013	0.84773	0.60012	0.7413	0.60012	0.67517	0.60012	0.62382	-0.06991	-0.03754	-0.06991	-0.0336	-0.06991	-0.03028
0.55008	0.94555	0.55008	0.91072	0.55008	0.79992	0.55008	0.7324	0.55008	0.63909	0.55008	0.58354	0.55008	0.53627	-0.05992	-0.03202	-0.05992	-0.02885	-0.05992	-0.02639
0.50009	0.81074	0.50009	0.78074	0.50009	0.68562	0.50009	0.62386	0.50009	0.54487	0.50009	0.49772	0.50009	0.45713	-0.04992	-0.02677	-0.04992	-0.02401	-0.04992	-0.02215
0.45012	0.68584	0.45012	0.65727	0.45011	0.57937	0.45011	0.52492	0.45011	0.45787	0.45011	0.41833	0.45012	0.38471	-0.03992	-0.02139	-0.03992	-0.01929	-0.03992	-0.0179
0.40012	0.56987	0.40012	0.54424	0.40012	0.48131	0.40012	0.43415	0.40012	0.38008	0.40012	0.34827	0.40012	0.31849	-0.02991	-0.01612	-0.02991	-0.01455	-0.02991	-0.01345
0.35009	0.4636	0.35008	0.43993	0.35008	0.39097	0.35008	0.35253	0.35008	0.3088	0.35008	0.2834	0.35008	0.26001	-0.01992	-0.01084	-0.01992	-0.0098	-0.01992	-0.00907
0.30009	0.36717	0.30009	0.34783	0.30008	0.31028	0.30008	0.27836	0.30008	0.24548	0.30009	0.22628	0.30009	0.20728	-0.00991	-0.00559	-0.00991	-0.00511	-0.00991	-0.00467
0.25009	0.28211	0.25009	0.26608	0.25008	0.23802	0.25008	0.21296	0.25008	0.18966	0.25009	0.17511	0.25009	0.16042	7.54682e-05	-0.000566737	7.62713e-05	-0.000573696	8.00859e-05	-0.000490317
0.20011	0.20727	0.2001	0.19422	0.2001	0.17531	0.2001	0.15675	0.2001	0.14042	0.20011	0.12947	0.20011	0.11932	0.0101	0.00496	0.0101	0.00438	0.0101	0.00405
0.1501	0.14234	0.15009	0.13331	0.15009	0.12118	0.1501	0.10813	0.1501	0.09782	0.15011	0.09063	0.15011	0.08333	0.02011	0.01031	0.02011	0.00921	0.02011	0.00853
0.1001	0.08779	0.1001	0.08195	0.1001	0.07507	0.1001	0.06663	0.10009	0.06082	0.1001	0.05637	0.1001	0.05202	0.0301	0.01575	0.03011	0.01412	0.03011	0.01306
0.0501	0.04139	0.0501	0.03851	0.05009	0.03539	0.05009	0.03123	0.05009	0.02869	0.0501	0.02646	0.0501	0.02432	0.0401	0.02127	0.0401	0.0191	0.0401	0.01748
7.38665e-05	-0.000668557	6.96504e-05	-0.000629429	6.90481e-05	-0.000568486	6.53338e-05	-0.000637223	6.98511e-05	-0.000568063	7.91824e-05	-0.000555705	7.80782e-05	-0.000637429	0.0501	0.02689	0.0501	0.0252	0.0501	0.02194
-0.04993	-0.04328	-0.04993	-0.04013	-0.04993	-0.03703	-0.04993	-0.03265	-0.04993	-0.02985	-0.04992	-0.0276	-0.04992	-0.02511	0.0601	0.03261	0.0601	0.03071	0.0601	0.02664
-0.09993	-0.09293	-0.09993	-0.08628	-0.09993	-0.07913	-0.09993	-0.06954	-0.09993	-0.06261	-0.09992	-0.05709	-0.09992	-0.05157	0.0701	0.03842	0.0701	0.03616	0.07009	0.03146
-0.14993	-0.15443	-0.14994	-0.14366	-0.14994	-0.12953	-0.14994	-0.11356	-0.14994	-0.10095	-0.14993	-0.09095	-0.14992	-0.0823	0.0801	0.04441	0.0801	0.04174	0.0801	0.03617
-0.1999	-0.22932	-0.19991	-0.21506	-0.19991	-0.19181	-0.19991	-0.16832	-0.19991	-0.14735	-0.19991	-0.13074	-0.1999	-0.11706	0.0901	0.05064	0.0901	0.04741	0.0901	0.04104
-0.24989	-0.32113	-0.2499	-0.30212	-0.2499	-0.26568	-0.2499	-0.23366	-0.2499	-0.20099	-0.24988	-0.17972	-0.24988	-0.15854	0.1001	0.05694	0.1001	0.05324	0.1001	0.04684
-0.29992	-0.43104	-0.29993	-0.40694	-0.29993	-0.35315	-0.29993	-0.30989	-0.29993	-0.26373	-0.29992	-0.23481	-0.29991	-0.20402	0.11011	0.06299	0.11011	0.05928	0.11011	0.05167
-0.34993	-0.55933	-0.34993	-0.52937	-0.34993	-0.4529	-0.34993	-0.39826	-0.34993	-0.33626	-0.34992	-0.29722	-0.34991	-0.25718	0.12011	0.0697	0.12011	0.06531	0.12011	0.05782
-0.39993	-0.71212	-0.39994	-0.67437	-0.39994	-0.57057	-0.39994	-0.50097	-0.39994	-0.41905	-0.39992	-0.36935	-0.39992	-0.31854	0.13011	0.07655	0.13011	0.07159	0.13011	0.06321
-0.44993	-0.88631	-0.44994	-0.83903	-0.44994	-0.7047	-0.44994	-0.6182	-0.44994	-0.51318	-0.44992	-0.45137	-0.44992	-0.38562	0.14011	0.08342	0.14011	0.07811	0.14011	0.06847
-0.49991	-1.08357	-0.49992	-1.02796	-0.49992	-0.85554	-0.49992	-0.75123	-0.49992	-0.61753	-0.4999	-0.54251	-0.49989	-0.4619	0.15011	0.0906	0.15011	0.08459	0.15011	0.07486
-0.5499	-1.30594	-0.54991	-1.24246	-0.54991	-1.0261	-0.54991	-0.90125	-0.54991	-0.73825	-0.54989	-0.64747	-0.54989	-0.54933	0.16011	0.09766	0.16011	0.09141	0.1601	0.08083
-0.59991	-1.5519	-0.59991	-1.47389	-0.59993	-1.22197	-0.59992	-1.0701	-0.59992	-0.87376	-0.5999	-0.76506	-0.5999	-0.6506	0.17011	0.10488	0.17011	0.0982	0.17011	0.08525
--	--	--	--	--	--	--	--	--	--	--	--	--	--	0.1801	0.1128	0.1801	0.10512	0.1801	0.09094
--	--	--	--	--	--	--	--	--	--	--	--	--	--	0.1901	0.12046	0.1901	0.11242	0.1901	0.09753
--	--	--	--	--	--	--	--	--	--	--	--	--	--	0.20012	0.12873	0.20012	0.11965	0.20012	0.09139
--	--	--	--	--	--	--	--	--	--	--	--	--	--	0.21012	0.13684	0.21012	0.12703	0.21011	0.09466
--	--	--	--	--	--	--	--	--	--	--	--	--	--	0.2201	0.14486	0.22012	0.13502	0.22011	0.10175
--	--	--	--	--	--	--	--	--	--	--	--	--	--	0.2301	0.15344	0.23011	0.14298	0.23011	0.10769
--	--	--	--	--	--	--	--	--	--	--	--	--	--	0.2401	0.16214	0.2401	0.15029	0.24011	0.11321
--	--	--	--	--	--	--	--	--	--	--	--	--	--	0.25009	0.171	0.25009	0.15602	0.2501	0.11908
--	--	--	--	--	--	--	--	--	--	--	--	--	--	0.26009	0.18028	0.26009	0.16247	0.2601	0.12536
--	--	--	--	--	--	--	--	--	--	--	--	--	--	0.27009	0.18962	0.27009	0.16448	0.27009	0.13625
--	--	--	--	--	--	--	--	--	--	--	--	--	--	0.28009	0.20015	0.28009	0.17205	0.28009	0.13979
--	--	--	--	--	--	--	--	--	--	--	--	--	--	0.29009	0.20935	0.29009	0.19328	0.29009	0.14528
--	--	--	--	--	--	--	--	--	--	--	--	--	--	0.30009	0.21983	0.30009	0.18938	0.30009	0.15134
--	--	--	--	--	--	--	--	--	--	--	--	--	--	0.31009	0.23013	0.31009	0.21347	0.31009	0.18383
--	--	--	--	--	--	--	--	--	--	--	--	--	--	0.32009	0.24095	0.32009	0.22305	0.32009	0.19417
--	--	--	--	--	--	--	--	--	--	--	--	--	--	0.33009	0.25155	0.33009	0.23282	0.33009	0.20393
--	--	--	--	--	--	--	--	--	--	--	--	--	--	0.34008	0.26233	0.34008	0.24274	0.34008	0.21351
--	--	--	--	--	--	--	--	--	--	--	--	--	--	0.35008	0.27372	0.35008	0.25312	0.35008	0.22232
--	--	--	--	--	--	--	--	--	--	--	--	--	--	0.36009	0.28451	0.36008	0.26341	0.36008	0.19284
--	--	--	--	--	--	--	--	--	--	--	--	--	--	0.37009	0.29638	0.37009	0.27394	0.37009	0.1977
--	--	--	--	--	--	--	--	--	--	--	--	--	--	0.38009	0.30925	0.38009	0.26458	0.38009	0.2051
--	--	--	--	--	--	--	--	--	--	--	--	--	--	0.39012	0.32081	0.39012	0.27189	0.39012	0.20871
--	--	--	--	--	--	--	--	--	--	--	--	--	--	0.40012	0.33331	0.40012	0.28176	0.40012	0.21337
--	--	--	--	--	--	--	--	--	--	--	--	--	--	0.41013	0.34623	0.41012	0.29152	0.41012	0.22228
--	--	--	--	--	--	--	--	--	--	--	--	--	--	0.42012	0.35885	0.42012	0.30284	0.42012	0.28521
--	--	--	--	--	--	--	--	--	--	--	--	--	--	0.43012	0.37248	0.43012	0.31235	0.43012	0.29579
--	--	--	--	--	--	--	--	--	--	--	--	--	--	0.44012	0.38625	0.44012	0.32503	0.44012	0.29882
--	--	--	--	--	--	--	--	--	--	--	--	--	--	0.45012	0.40007	0.45011	0.33568	0.45011	0.27741
--	--	--	--	--	--	--	--	--	--	--	--	--	--	0.46011	0.41532	0.46011	0.34799	0.46011	0.31357
--	--	--	--	--	--	--	--	--	--	--	--	--	--	0.47011	0.4291	0.47011	0.3604	0.4701	0.3265
--	--	--	--	--	--	--	--	--	--	--	--	--	--	0.4801	0.44257	0.4801	0.37196	0.4801	0.34413
--	--	--	--	--	--	--	--	--	--	--	--	--	--	0.49009	0.45695	0.49009	0.38432	0.49009	0.35178
--	--	--	--	--	--	--	--	--	--	--	--	--	--	0.50009	0.47335	0.50009	0.39622	0.50009	0.34797
--	--	--	--	--	--	--	--	--	--	--	--	--	--	0.51009	0.48896	0.51009	0.40853	0.51009	0.36641
--	--	--	--	--	--	--	--	--	--	--	--	--	--	0.52009	0.50359	0.52008	0.41931	0.52008	0.37937
--	--	--	--	--	--	--	--	--	--	--	--	--	--	0.53008	0.51988	0.53008	0.43337	0.53008	0.39773
--	--	--	--	--	--	--	--	--	--	--	--	--	--	0.54008	0.53681	0.54008	0.44483	0.54007	0.41125
--	--	--	--	--	--	--	--	--	--	--	--	--	--	0.55008	0.55346	0.55008	0.45892	0.55008	0.42574
--	--	--	--	--	--	--	--	--	--	--	--	--	--	0.56008	0.57124	0.56008	0.47326	0.56009	0.44145
--	--	--	--	--	--	--	--	--	--	--	--	--	--	0.57008	0.58751	0.57008	0.4867	0.57008	0.43501
--	--	--	--	--	--	--	--	--	--	--	--	--	--	0.58012	0.60518	0.58012	0.50297	0.58012	0.44984
--	--	--	--	--	--	--	--	--	--	--	--	--	--	0.59012	0.62308	0.59012	0.51546	0.59012	0.45942
--	--	--	--	--	--	--	--	--	--	--	--	--	--	0.60012	0.64335	0.60012	0.52946	0.60012	0.46087
--	--	--	--	--	--	--	--	--	--	--	--	--	--	0.61011	0.66106	0.61011	0.53966	0.61011	0.48059
--	--	--	--	--	--	--	--	--	--	--	--	--	--	0.62011	0.67903	0.62011	0.5536	0.62011	0.49317
--	--	--	--	--	--	--	--	--	--	--	--	--	--	0.63012	0.69787	0.63011	0.56996	0.63011	0.50678
--	--	--	--	--	--	--	--	--	--	--	--	--	--	0.64012	0.71653	0.64012	0.58222	0.64012	0.53979
--	--	--	--	--	--	--	--	--	--	--	--	--	--	0.65012	0.73528	0.65012	0.59619	0.65012	0.55565
--	--	--	--	--	--	--	--	--	--	--	--	--	--	0.66012	0.75606	0.66012	0.61217	0.66011	0.56943
--	--	--	--	--	--	--	--	--	--	--	--	--	--	0.67012	0.77805	0.67012	0.62566	0.67012	0.59091
--	--	--	--	--	--	--	--	--	--	--	--	--	--	0.68013	0.79884	0.68012	0.64486	0.68012	0.60384
--	--	--	--	--	--	--	--	--	--	--	--	--	--	0.69013	0.81853	0.69012	0.66002	0.69012	0.59427
--	--	--	--	--	--	--	--	--	--	--	--	--	--	0.70012	0.83829	0.70012	0.67328	0.70012	0.60476
--	--	--	--	--	--	--	--	--	--	--	--	--	--	0.71012	0.86087	0.71012	0.688	0.71011	0.61779
--	--	--	--	--	--	--	--	--	--	--	--	--	--	0.72012	0.88257	0.72012	0.70664	0.72012	0.63474
--	--	--	--	--	--	--	--	--	--	--	--	--	--	0.73012	0.9044	0.73011	0.71927	0.73011	0.64019
--	--	--	--	--	--	--	--	--	--	--	--	--	--	0.74011	0.92672	0.74011	0.74073	0.74011	0.66421
--	--	--	--	--	--	--	--	--	--	--	--	--	--	0.7501	0.95006	0.7501	0.75595	0.7501	0.70775
--	--	--	--	--	--	--	--	--	--	--	--	--	--	0.7601	0.97313	0.76009	0.76978	0.7601	0.71568
--	--	--	--	--	--	--	--	--	--	--	--	--	--	0.77013	0.99635	0.77012	0.79189	0.77012	0.72989
--	--	--	--	--	--	--	--	--	--	--	--	--	--	0.78012	1.02015	0.78012	0.80612	0.78012	0.76188
--	--	--	--	--	--	--	--	--	--	--	--	--	--	0.79012	1.04356	0.79012	0.82263	0.79012	0.78771
--	--	--	--	--	--	--	--	--	--	--	--	--	--	0.80012	1.07	0.80012	0.8444	0.80013	0.78986
--	--	--	--	--	--	--	--	--	--	--	--	--	--	0.81012	1.09307	0.81011	0.8581	0.81011	0.81031
--	--	--	--	--	--	--	--	--	--	--	--	--	--	0.82012	1.1167	0.82011	0.88411	0.82011	0.82733
--	--	--	--	--	--	--	--	--	--	--	--	--	--	0.83012	1.14183	0.83012	0.89815	0.83011	0.80594
--	--	--	--	--	--	--	--	--	--	--	--	--	--	0.84012	1.1674	0.84011	0.91253	0.84012	0.86083
--	--	--	--	--	--	--	--	--	--	--	--	--	--	0.85012	1.19377	0.85012	0.93216	0.85012	0.86841
--	--	--	--	--	--	--	--	--	--	--	--	--	--	0.86012	1.22108	0.86012	0.94887	0.86011	0.85978
--	--	--	--	--	--	--	--	--	--	--	--	--	--	0.87012	1.24698	0.87012	0.96597	0.87012	0.88214
--	--	--	--	--	--	--	--	--	--	--	--	--	--	0.88012	1.27319	0.88012	0.9728	0.88012	0.90235
--	--	--	--	--	--	--	--	--	--	--	--	--	--	0.89011	1.30203	0.89011	0.99431	0.89011	0.91267
--	--	--	--	--	--	--	--	--	--	--	--	--	--	0.90011	1.32804	0.90011	1.01318	0.90011	0.96956
--	--	--	--	--	--	--	--	--	--	--	--	--	--	0.91012	1.3552	0.91011	1.03567	0.91011	0.97856
--	--	--	--	--	--	--	--	--	--	--	--	--	--	0.92012	1.39019	0.92011	1.06323	0.92011	0.97181
--	--	--	--	--	--	--	--	--	--	--	--	--	--	0.93012	1.41847	0.93012	1.08912	0.93012	0.99649
--	--	--	--	--	--	--	--	--	--	--	--	--	--	0.94011	1.44234	0.94012	1.10844	0.94012	1.01241
--	--	--	--	--	--	--	--	--	--	--	--	--	--	0.95011	1.46726	0.95012	1.13019	0.95011	1.039
--	--	--	--	--	--	--	--	--	--	--	--	--	--	0.96015	1.49874	0.96016	1.14877	0.96016	1.06965
--	--	--	--	--	--	--	--	--	--	--	--	--	--	0.97014	1.52778	0.97016	1.16686	0.97016	1.12141
--	--	--	--	--	--	--	--	--	--	--	--	--	--	0.98014	1.55793	0.98015	1.19606	0.98015	1.13854
--	--	--	--	--	--	--	--	--	--	--	--	--	--	0.99014	1.5864	0.99016	1.21495	0.99017	1.16268
--	--	--	--	--	--	--	--	--	--	--	--	--	--	1.00014	1.61726	1.00015	1.23783	1.00015	1.18779
--	--	--	--	--	--	--	--	--	--	--	--	--	--	1.01014	1.64838	1.01015	1.27923	1.01016	1.16759
--	--	--	--	--	--	--	--	--	--	--	--	--	--	1.02013	1.68339	1.02014	1.29757	1.02014	1.20808
--	--	--	--	--	--	--	--	--	--	--	--	--	--	1.03013	1.71489	1.03013	1.32377	1.03013	1.22489
--	--	--	--	--	--	--	--	--	--	--	--	--	--	1.04012	1.75059	1.04014	1.34973	1.04012	1.19551
--	--	--	--	--	--	--	--	--	--	--	--	--	--	1.05012	1.78183	1.05013	1.36462	1.05015	1.25249
--	--	--	--	--	--	--	--	--	--	--	--	--	--	1.06012	1.81481	1.06013	1.38847	1.06014	1.23229
--	--	--	--	--	--	--	--	--	--	--	--	--	--	1.07012	1.84772	1.07013	1.40484	1.07013	1.28456
--	--	--	--	--	--	--	--	--	--	--	--	--	--	1.08012	1.88372	1.08012	1.43256	1.08013	1.30751
--	--	--	--	--	--	--	--	--	--	--	--	--	--	1.09012	1.91803	1.09011	1.44293	1.09013	1.36868
--	--	--	--	--	--	--	--	--	--	--	--	--	--	1.10012	1.95044	1.10012	1.47536	1.10012	1.40323
--	--	--	--	--	--	--	--	--	--	--	--	--	--	1.11012	1.98521	1.11012	1.48664	1.11013	1.4367
--	--	--	--	--	--	--	--	--	--	--	--	--	--	1.12012	2.0214	1.12012	1.5148	1.12011	1.45993
--	--	--	--	--	--	--	--	--	--	--	--	--	--	1.13012	2.05249	1.13012	1.54183	1.13012	1.47007
--	--	--	--	--	--	--	--	--	--	--	--	--	--	1.14012	2.08996	1.14012	1.53832	1.14012	1.12831
--	--	--	--	--	--	--	--	--	--	--	--	--	--	1.15015	2.12357	1.15015	1.58697	1.15016	1.13106
--	--	--	--	--	--	--	--	--	--	--	--	--	--	1.16014	2.16526	1.16014	1.60655	1.16014	1.21579
--	--	--	--	--	--	--	--	--	--	--	--	--	--	1.17015	2.19656	1.17015	1.62356	1.17014	1.3628
--	--	--	--	--	--	--	--	--	--	--	--	--	--	1.18015	2.2366	1.18015	1.64907	1.18015	1.70627
--	--	--	--	--	--	--	--	--	--	--	--	--	--	1.19015	2.27495	1.19015	1.66857	1.19015	1.7378
--	--	--	--	--	--	--	--	--	--	--	--	--	--	1.20015	2.31122	1.20015	1.70868	1.20015	1.77139
--	--	--	--	--	--	--	--	--	--	--	--	--	--	1.21015	2.35321	1.21015	1.74336	1.21015	1.80538
--	--	--	--	--	--	--	--	--	--	--	--	--	--	1.22015	2.39128	1.22015	1.77022	1.22015	1.85182
--	--	--	--	--	--	--	--	--	--	--	--	--	--	1.23015	2.43239	1.23015	1.79431	1.23015	1.8539
--	--	--	--	--	--	--	--	--	--	--	--	--	--	1.24015	2.47253	1.24015	1.82927	1.24015	1.27352
--	--	--	--	--	--	--	--	--	--	--	--	--	--	1.25015	2.51289	1.25015	1.85088	1.25014	1.32448
--	--	--	--	--	--	--	--	--	--	--	--	--	--	1.26014	2.55373	1.26014	1.88178	1.26015	1.39132
--	--	--	--	--	--	--	--	--	--	--	--	--	--	1.27014	2.60397	1.27014	1.90443	1.27014	1.20802
--	--	--	--	--	--	--	--	--	--	--	--	--	--	1.28014	2.6398	1.28013	1.9491	1.28013	1.19301
--	--	--	--	--	--	--	--	--	--	--	--	--	--	1.29013	2.67825	1.29013	1.98095	1.29013	1.19618
--	--	--	--	--	--	--	--	--	--	--	--	--	--	1.30012	2.72645	1.30012	1.98939	1.30011	1.22284
--	--	--	--	--	--	--	--	--	--	--	--	--	--	1.30012	2.71138	1.30012	1.99449	1.30012	1.31877
--	--	--	--	--	--	--	--	--	--	--	--	--	--	1.29013	2.66385	1.29013	1.94707	1.29013	1.27682
--	--	--	--	--	--	--	--	--	--	--	--	--	--	1.28014	2.61122	1.28013	1.91132	1.28013	1.30782
--	--	--	--	--	--	--	--	--	--	--	--	--	--	1.27014	2.5679	1.27014	1.88537	1.27014	1.35095
--	--	--	--	--	--	--	--	--	--	--	--	--	--	1.26014	2.51518	1.26014	1.83563	1.26014	1.31385
--	--	--	--	--	--	--	--	--	--	--	--	--	--	1.25015	2.46958	1.25015	1.82042	1.25015	1.35976
--	--	--	--	--	--	--	--	--	--	--	--	--	--	1.24015	2.42482	1.24015	1.79916	1.24015	1.35144
--	--	--	--	--	--	--	--	--	--	--	--	--	--	1.23015	2.38003	1.23015	1.76512	1.23016	1.31517
--	--	--	--	--	--	--	--	--	--	--	--	--	--	1.22015	2.33102	1.22015	1.73365	1.22015	1.23815
--	--	--	--	--	--	--	--	--	--	--	--	--	--	1.21015	2.28886	1.21015	1.71306	1.21015	1.27336
--	--	--	--	--	--	--	--	--	--	--	--	--	--	1.20015	2.24151	1.20015	1.68523	1.20013	1.16361
--	--	--	--	--	--	--	--	--	--	--	--	--	--	1.19015	2.19775	1.19015	1.66315	1.19015	1.80384
--	--	--	--	--	--	--	--	--	--	--	--	--	--	1.18015	2.15215	1.18015	1.6335	1.18015	1.7843
--	--	--	--	--	--	--	--	--	--	--	--	--	--	1.17015	2.11366	1.17015	1.60341	1.17014	1.73619
--	--	--	--	--	--	--	--	--	--	--	--	--	--	1.16015	2.07222	1.16015	1.5877	1.16015	1.71279
--	--	--	--	--	--	--	--	--	--	--	--	--	--	1.15015	2.03446	1.15015	1.55417	1.15015	1.60878
--	--	--	--	--	--	--	--	--	--	--	--	--	--	1.14012	1.99276	1.14012	1.53457	1.14012	0.83224
--	--	--	--	--	--	--	--	--	--	--	--	--	--	1.13012	1.95445	1.13012	1.50763	1.13013	0.79898
--	--	--	--	--	--	--	--	--	--	--	--	--	--	1.12012	1.91627	1.12012	1.47423	1.12013	0.76388
--	--	--	--	--	--	--	--	--	--	--	--	--	--	1.11012	1.87672	1.11012	1.45902	1.11012	0.79972
--	--	--	--	--	--	--	--	--	--	--	--	--	--	1.10012	1.83919	1.10012	1.42874	1.10012	0.77602
--	--	--	--	--	--	--	--	--	--	--	--	--	--	1.09012	1.80136	1.09012	1.40517	1.09013	0.73741
--	--	--	--	--	--	--	--	--	--	--	--	--	--	1.08011	1.76225	1.08011	1.3852	1.08011	0.73072
--	--	--	--	--	--	--	--	--	--	--	--	--	--	1.07012	1.72743	1.07012	1.34865	1.07013	0.73185
--	--	--	--	--	--	--	--	--	--	--	--	--	--	1.06012	1.6935	1.06012	1.32839	1.06013	0.70338
--	--	--	--	--	--	--	--	--	--	--	--	--	--	1.05012	1.66011	1.05012	1.29672	1.05012	0.72524
--	--	--	--	--	--	--	--	--	--	--	--	--	--	1.04012	1.62737	1.04012	1.27621	1.04013	0.72344
--	--	--	--	--	--	--	--	--	--	--	--	--	--	1.03013	1.59661	1.03013	1.25354	1.03014	0.7085
--	--	--	--	--	--	--	--	--	--	--	--	--	--	1.02012	1.56173	1.02013	1.21628	1.02013	0.70125
--	--	--	--	--	--	--	--	--	--	--	--	--	--	1.01014	1.53124	1.01014	1.20611	1.01014	0.70378
--	--	--	--	--	--	--	--	--	--	--	--	--	--	1.00014	1.50142	1.00014	1.17791	1.00015	0.68894
--	--	--	--	--	--	--	--	--	--	--	--	--	--	0.99014	1.46827	0.99014	1.15008	0.99015	0.68686
--	--	--	--	--	--	--	--	--	--	--	--	--	--	0.98014	1.43554	0.98014	1.1332	0.98015	0.68228
--	--	--	--	--	--	--	--	--	--	--	--	--	--	0.97014	1.4065	0.97015	1.10929	0.97015	0.67439
--	--	--	--	--	--	--	--	--	--	--	--	--	--	0.96015	1.37718	0.96015	1.0986	0.96015	0.66108
--	--	--	--	--	--	--	--	--	--	--	--	--	--	0.95011	1.34702	0.95012	1.07299	0.95011	0.65481
--	--	--	--	--	--	--	--	--	--	--	--	--	--	0.94011	1.32002	0.94012	1.05167	0.94011	0.633
--	--	--	--	--	--	--	--	--	--	--	--	--	--	0.93011	1.292	0.93011	1.03288	0.93011	0.59917
--	--	--	--	--	--	--	--	--	--	--	--	--	--	0.92011	1.26395	0.92011	1.00749	0.92011	0.59683
--	--	--	--	--	--	--	--	--	--	--	--	--	--	0.9101	1.23413	0.91011	0.98623	0.91011	0.58399
--	--	--	--	--	--	--	--	--	--	--	--	--	--	0.9001	1.20547	0.90011	0.96974	0.90011	0.57142
--	--	--	--	--	--	--	--	--	--	--	--	--	--	0.8901	1.18159	0.89011	0.94824	0.89011	0.55985
--	--	--	--	--	--	--	--	--	--	--	--	--	--	0.88011	1.15446	0.88012	0.9273	0.88012	0.55543
--	--	--	--	--	--	--	--	--	--	--	--	--	--	0.87011	1.12977	0.87012	0.90679	0.87011	0.54874
--	--	--	--	--	--	--	--	--	--	--	--	--	--	0.86012	1.10348	0.86012	0.88892	0.86011	0.54537
--	--	--	--	--	--	--	--	--	--	--	--	--	--	0.85012	1.07981	0.85011	0.87372	0.85012	0.5269
--	--	--	--	--	--	--	--	--	--	--	--	--	--	0.84012	1.05339	0.84012	0.8524	0.84011	0.517
--	--	--	--	--	--	--	--	--	--	--	--	--	--	0.83012	1.03171	0.83011	0.83957	0.8301	0.49772
--	--	--	--	--	--	--	--	--	--	--	--	--	--	0.82012	1.00762	0.82011	0.82107	0.82011	0.47306
--	--	--	--	--	--	--	--	--	--	--	--	--	--	0.81012	0.98235	0.81011	0.80341	0.81011	0.45947
--	--	--	--	--	--	--	--	--	--	--	--	--	--	0.80012	0.95865	0.80011	0.78865	0.80011	0.4628
--	--	--	--	--	--	--	--	--	--	--	--	--	--	0.79012	0.93555	0.79012	0.76806	0.79012	0.44766
--	--	--	--	--	--	--	--	--	--	--	--	--	--	0.78012	0.91373	0.78012	0.75058	0.78012	0.44372
--	--	--	--	--	--	--	--	--	--	--	--	--	--	0.77013	0.89108	0.77012	0.73427	0.77012	0.44073
--	--	--	--	--	--	--	--	--	--	--	--	--	--	0.76009	0.86814	0.76009	0.71417	0.76009	0.43796
--	--	--	--	--	--	--	--	--	--	--	--	--	--	0.7501	0.84845	0.7501	0.70102	0.7501	0.42683
--	--	--	--	--	--	--	--	--	--	--	--	--	--	0.74011	0.82644	0.74011	0.68647	0.7401	0.42004
--	--	--	--	--	--	--	--	--	--	--	--	--	--	0.73012	0.80504	0.73011	0.66896	0.73011	0.40917
--	--	--	--	--	--	--	--	--	--	--	--	--	--	0.72012	0.78471	0.72011	0.65599	0.72011	0.38994
--	--	--	--	--	--	--	--	--	--	--	--	--	--	0.71012	0.76431	0.71012	0.64118	0.71011	0.38468
--	--	--	--	--	--	--	--	--	--	--	--	--	--	0.70012	0.74516	0.70012	0.62343	0.70011	0.37957
--	--	--	--	--	--	--	--	--	--	--	--	--	--	0.69012	0.72772	0.69012	0.61018	0.69013	0.37206
--	--	--	--	--	--	--	--	--	--	--	--	--	--	0.68013	0.70618	0.68012	0.59348	0.68011	0.35508
--	--	--	--	--	--	--	--	--	--	--	--	--	--	0.67012	0.68689	0.67012	0.58161	0.67012	0.35096
--	--	--	--	--	--	--	--	--	--	--	--	--	--	0.66012	0.67001	0.66012	0.56737	0.66012	0.34843
--	--	--	--	--	--	--	--	--	--	--	--	--	--	0.65012	0.65197	0.65012	0.55165	0.65011	0.34746
--	--	--	--	--	--	--	--	--	--	--	--	--	--	0.64012	0.63334	0.64011	0.5372	0.64011	0.34359
--	--	--	--	--	--	--	--	--	--	--	--	--	--	0.63012	0.61538	0.63011	0.52426	0.63011	0.33304
--	--	--	--	--	--	--	--	--	--	--	--	--	--	0.62011	0.59666	0.62011	0.50999	0.62011	0.32895
--	--	--	--	--	--	--	--	--	--	--	--	--	--	0.61011	0.58111	0.61011	0.49746	0.61011	0.31229
--	--	--	--	--	--	--	--	--	--	--	--	--	--	0.60012	0.56249	0.60012	0.48284	0.60012	0.29991
--	--	--	--	--	--	--	--	--	--	--	--	--	--	0.59012	0.54653	0.59012	0.47011	0.59011	0.30159
--	--	--	--	--	--	--	--	--	--	--	--	--	--	0.58012	0.53002	0.58012	0.45795	0.58012	0.29343
--	--	--	--	--	--	--	--	--	--	--	--	--	--	0.57008	0.51406	0.57008	0.44434	0.57008	0.27751
--	--	--	--	--	--	--	--	--	--	--	--	--	--	0.56008	0.49902	0.56008	0.43258	0.56008	0.27335
--	--	--	--	--	--	--	--	--	--	--	--	--	--	0.55008	0.48455	0.55008	0.41946	0.55008	0.27248
--	--	--	--	--	--	--	--	--	--	--	--	--	--	0.54008	0.46924	0.54008	0.40689	0.54008	0.2651
--	--	--	--	--	--	--	--	--	--	--	--	--	--	0.53008	0.45449	0.53008	0.39607	0.53008	0.25855
--	--	--	--	--	--	--	--	--	--	--	--	--	--	0.52008	0.44035	0.52009	0.38319	0.52008	0.25148
--	--	--	--	--	--	--	--	--	--	--	--	--	--	0.51009	0.42593	0.51009	0.37138	0.51009	0.24672
--	--	--	--	--	--	--	--	--	--	--	--	--	--	0.50009	0.41276	0.50009	0.35968	0.50008	0.24206
--	--	--	--	--	--	--	--	--	--	--	--	--	--	0.49009	0.39963	0.49009	0.34765	0.49009	0.23255
--	--	--	--	--	--	--	--	--	--	--	--	--	--	0.4801	0.38667	0.4801	0.33688	0.4801	0.21616
--	--	--	--	--	--	--	--	--	--	--	--	--	--	0.47011	0.37381	0.4701	0.32661	0.47011	0.21277
--	--	--	--	--	--	--	--	--	--	--	--	--	--	0.46011	0.36092	0.46011	0.31525	0.46011	0.20844
--	--	--	--	--	--	--	--	--	--	--	--	--	--	0.45011	0.3482	0.45011	0.306	0.45011	0.20395
--	--	--	--	--	--	--	--	--	--	--	--	--	--	0.44012	0.33649	0.44012	0.29557	0.44012	0.20915
--	--	--	--	--	--	--	--	--	--	--	--	--	--	0.43012	0.3243	0.43012	0.28451	0.43011	0.20034
--	--	--	--	--	--	--	--	--	--	--	--	--	--	0.42012	0.3128	0.42012	0.27548	0.42012	0.19637
--	--	--	--	--	--	--	--	--	--	--	--	--	--	0.41012	0.30093	0.41013	0.26523	0.41012	0.20299
--	--	--	--	--	--	--	--	--	--	--	--	--	--	0.40012	0.28903	0.40012	0.25571	0.40012	0.25232
--	--	--	--	--	--	--	--	--	--	--	--	--	--	0.39012	0.27807	0.39012	0.24702	0.39012	0.21248
--	--	--	--	--	--	--	--	--	--	--	--	--	--	0.38009	0.26758	0.38009	0.23724	0.38009	0.16172
--	--	--	--	--	--	--	--	--	--	--	--	--	--	0.37009	0.25622	0.37009	0.22804	0.37008	0.15707
--	--	--	--	--	--	--	--	--	--	--	--	--	--	0.36008	0.24554	0.36008	0.21959	0.36008	0.1514
--	--	--	--	--	--	--	--	--	--	--	--	--	--	0.35008	0.23556	0.35008	0.21021	0.35008	0.14698
--	--	--	--	--	--	--	--	--	--	--	--	--	--	0.34008	0.22507	0.34008	0.20199	0.34008	0.14662
--	--	--	--	--	--	--	--	--	--	--	--	--	--	0.33009	0.21592	0.33009	0.19351	0.33009	0.1396
--	--	--	--	--	--	--	--	--	--	--	--	--	--	0.32009	0.20608	0.32009	0.18564	0.32009	0.13481
--	--	--	--	--	--	--	--	--	--	--	--	--	--	0.31009	0.19732	0.31009	0.17789	0.31009	0.13187
--	--	--	--	--	--	--	--	--	--	--	--	--	--	0.30009	0.18824	0.30009	0.16961	0.30009	0.12507
--	--	--	--	--	--	--	--	--	--	--	--	--	--	0.29009	0.17966	0.29009	0.16239	0.29009	0.11989
--	--	--	--	--	--	--	--	--	--	--	--	--	--	0.28009	0.17116	0.28009	0.15473	0.28009	0.11571
--	--	--	--	--	--	--	--	--	--	--	--	--	--	0.27009	0.16269	0.27009	0.14752	0.2701	0.11091
--	--	--	--	--	--	--	--	--	--	--	--	--	--	0.26009	0.15483	0.26009	0.14083	0.26009	0.10388
--	--	--	--	--	--	--	--	--	--	--	--	--	--	0.25009	0.14662	0.25009	0.13316	0.25011	0.09828
--	--	--	--	--	--	--	--	--	--	--	--	--	--	0.2401	0.13867	0.2401	0.1264	0.2401	0.09238
--	--	--	--	--	--	--	--	--	--	--	--	--	--	0.2301	0.13125	0.2301	0.11985	0.23011	0.08695
--	--	--	--	--	--	--	--	--	--	--	--	--	--	0.2201	0.1236	0.2201	0.11301	0.22011	0.08274
--	--	--	--	--	--	--	--	--	--	--	--	--	--	0.2101	0.11618	0.21012	0.10671	0.21011	0.07875
--	--	--	--	--	--	--	--	--	--	--	--	--	--	0.20012	0.10954	0.20012	0.10012	0.20012	0.07403
--	--	--	--	--	--	--	--	--	--	--	--	--	--	0.1901	0.10272	0.1901	0.09409	0.19009	0.06995
--	--	--	--	--	--	--	--	--	--	--	--	--	--	0.1801	0.09612	0.1801	0.08792	0.1801	0.06678
--	--	--	--	--	--	--	--	--	--	--	--	--	--	0.17011	0.08962	0.17011	0.0826	0.1701	0.06214
--	--	--	--	--	--	--	--	--	--	--	--	--	--	0.1601	0.0832	0.16011	0.07688	0.1601	0.05731
--	--	--	--	--	--	--	--	--	--	--	--	--	--	0.15011	0.07703	0.15011	0.07103	0.15011	0.0537
--	--	--	--	--	--	--	--	--	--	--	--	--	--	0.14011	0.07095	0.14011	0.06564	0.14011	0.04981
--	--	--	--	--	--	--	--	--	--	--	--	--	--	0.13011	0.06521	0.13011	0.06034	0.13011	0.04641
--	--	--	--	--	--	--	--	--	--	--	--	--	--	0.12011	0.05939	0.12011	0.0549	0.12011	0.04285
--	--	--	--	--	--	--	--	--	--	--	--	--	--	0.11011	0.05391	0.11011	0.04992	0.1101	0.03908
--	--	--	--	--	--	--	--	--	--	--	--	--	--	0.1001	0.04844	0.1001	0.04498	0.1001	0.03509
--	--	--	--	--	--	--	--	--	--	--	--	--	--	0.0901	0.04311	0.0901	0.03987	0.0901	0.03176
--	--	--	--	--	--	--	--	--	--	--	--	--	--	0.0801	0.03783	0.0801	0.03512	0.0801	0.02798
--	--	--	--	--	--	--	--	--	--	--	--	--	--	0.0701	0.0327	0.0701	0.03041	0.0701	0.02432
--	--	--	--	--	--	--	--	--	--	--	--	--	--	0.0601	0.02772	0.0601	0.0258	0.0601	0.02039
--	--	--	--	--	--	--	--	--	--	--	--	--	--	0.0501	0.02287	0.0501	0.02128	0.0501	0.01663
--	--	--	--	--	--	--	--	--	--	--	--	--	--	0.0401	0.01797	0.0401	0.01682	0.0401	0.01344
--	--	--	--	--	--	--	--	--	--	--	--	--	--	0.0301	0.0133	0.0301	0.01242	0.03011	0.00986
--	--	--	--	--	--	--	--	--	--	--	--	--	--	0.02011	0.00868	0.02011	0.00805	0.0201	0.0064
--	--	--	--	--	--	--	--	--	--	--	--	--	--	0.0101	0.00412	0.0101	0.00378	0.0101	0.00298
--	--	--	--	--	--	--	--	--	--	--	--	--	--	8.07885e-05	-0.000507997	8.23947e-05	-0.00053256	8.31978e-05	-0.000456499
--	--	--	--	--	--	--	--	--	--	--	--	--	--	-0.00991	-0.00493	-0.00991	-0.00466	-0.00991	-0.00371
--	--	--	--	--	--	--	--	--	--	--	--	--	--	-0.01992	-0.00945	-0.01992	-0.00887	-0.01991	-0.007
--	--	--	--	--	--	--	--	--	--	--	--	--	--	-0.02992	-0.014	-0.02992	-0.01311	-0.02992	-0.01028
--	--	--	--	--	--	--	--	--	--	--	--	--	--	-0.03992	-0.01859	-0.03991	-0.01735	-0.03992	-0.01355
--	--	--	--	--	--	--	--	--	--	--	--	--	--	-0.04992	-0.02318	-0.04992	-0.02164	-0.04991	-0.017
--	--	--	--	--	--	--	--	--	--	--	--	--	--	-0.05992	-0.02788	-0.05992	-0.02595	-0.05992	-0.02044
--	--	--	--	--	--	--	--	--	--	--	--	--	--	-0.06991	-0.03269	-0.06991	-0.03029	-0.06991	-0.0239
--	--	--	--	--	--	--	--	--	--	--	--	--	--	-0.07991	-0.03749	-0.07991	-0.03466	-0.07991	-0.02719
--	--	--	--	--	--	--	--	--	--	--	--	--	--	-0.08991	-0.04265	-0.08991	-0.03897	-0.08991	-0.0305
--	--	--	--	--	--	--	--	--	--	--	--	--	--	-0.09992	-0.04767	-0.09992	-0.04343	-0.09992	-0.03373
--	--	--	--	--	--	--	--	--	--	--	--	--	--	-0.10992	-0.05293	-0.10992	-0.04807	-0.10992	-0.03746
--	--	--	--	--	--	--	--	--	--	--	--	--	--	-0.11992	-0.05832	-0.11992	-0.05286	-0.11992	-0.04043
--	--	--	--	--	--	--	--	--	--	--	--	--	--	-0.12992	-0.06366	-0.12992	-0.05765	-0.12992	-0.04396
--	--	--	--	--	--	--	--	--	--	--	--	--	--	-0.13993	-0.0692	-0.13993	-0.06233	-0.13992	-0.04735
--	--	--	--	--	--	--	--	--	--	--	--	--	--	-0.14992	-0.0751	-0.14992	-0.06745	-0.14992	-0.05082
--	--	--	--	--	--	--	--	--	--	--	--	--	--	-0.15992	-0.08087	-0.15992	-0.0726	-0.15992	-0.05424
--	--	--	--	--	--	--	--	--	--	--	--	--	--	-0.16992	-0.08704	-0.16992	-0.07797	-0.16992	-0.05807
--	--	--	--	--	--	--	--	--	--	--	--	--	--	-0.17992	-0.09318	-0.17992	-0.08293	-0.17991	-0.06169
--	--	--	--	--	--	--	--	--	--	--	--	--	--	-0.18991	-0.09979	-0.18991	-0.08837	-0.18991	-0.06534
--	--	--	--	--	--	--	--	--	--	--	--	--	--	-0.1999	-0.10656	-0.1999	-0.09403	-0.1999	-0.06883
--	--	--	--	--	--	--	--	--	--	--	--	--	--	-0.2099	-0.11312	-0.2099	-0.09975	-0.20989	-0.07308
--	--	--	--	--	--	--	--	--	--	--	--	--	--	-0.2199	-0.12022	-0.2199	-0.10516	-0.21989	-0.07647
--	--	--	--	--	--	--	--	--	--	--	--	--	--	-0.2299	-0.12767	-0.22989	-0.11146	-0.2299	-0.0797
--	--	--	--	--	--	--	--	--	--	--	--	--	--	-0.2399	-0.13496	-0.23989	-0.11741	-0.23989	-0.08402
--	--	--	--	--	--	--	--	--	--	--	--	--	--	-0.24989	-0.14212	-0.24989	-0.12351	-0.24988	-0.08815
--	--	--	--	--	--	--	--	--	--	--	--	--	--	-0.25991	-0.15056	-0.25992	-0.13015	-0.25992	-0.09162
--	--	--	--	--	--	--	--	--	--	--	--	--	--	-0.26991	-0.15862	-0.26992	-0.13626	-0.26992	-0.09748
--	--	--	--	--	--	--	--	--	--	--	--	--	--	-0.27991	-0.16596	-0.27992	-0.14288	-0.27992	-0.10219
--	--	--	--	--	--	--	--	--	--	--	--	--	--	-0.28991	-0.17511	-0.28991	-0.15032	-0.28992	-0.10688
--	--	--	--	--	--	--	--	--	--	--	--	--	--	-0.29991	-0.1836	-0.29991	-0.15689	-0.29992	-0.11151
--	--	--	--	--	--	--	--	--	--	--	--	--	--	-0.30992	-0.19179	-0.30992	-0.16453	-0.30992	-0.11644
--	--	--	--	--	--	--	--	--	--	--	--	--	--	-0.31992	-0.20115	-0.31992	-0.17131	-0.31993	-0.12022
--	--	--	--	--	--	--	--	--	--	--	--	--	--	-0.32992	-0.21009	-0.32992	-0.17863	-0.32993	-0.12396
--	--	--	--	--	--	--	--	--	--	--	--	--	--	-0.33991	-0.21942	-0.33991	-0.18656	-0.33991	-0.12748
--	--	--	--	--	--	--	--	--	--	--	--	--	--	-0.34991	-0.2293	-0.34991	-0.19428	-0.34992	-0.13264
--	--	--	--	--	--	--	--	--	--	--	--	--	--	-0.35991	-0.23926	-0.35991	-0.20188	-0.35992	-0.13804
--	--	--	--	--	--	--	--	--	--	--	--	--	--	-0.36991	-0.25038	-0.36991	-0.20994	-0.36993	-0.14287
--	--	--	--	--	--	--	--	--	--	--	--	--	--	-0.37992	-0.26114	-0.37992	-0.21768	-0.37992	-0.14743
--	--	--	--	--	--	--	--	--	--	--	--	--	--	-0.38992	-0.27088	-0.38992	-0.22603	-0.38992	-0.15278
--	--	--	--	--	--	--	--	--	--	--	--	--	--	-0.39992	-0.28214	-0.39992	-0.2346	-0.39992	-0.15757
--	--	--	--	--	--	--	--	--	--	--	--	--	--	-0.40992	-0.29306	-0.40992	-0.24267	-0.40992	-0.15944
--	--	--	--	--	--	--	--	--	--	--	--	--	--	-0.41992	-0.30521	-0.41992	-0.25144	-0.41992	-0.16591
--	--	--	--	--	--	--	--	--	--	--	--	--	--	-0.42992	-0.31708	-0.42992	-0.26118	-0.42991	-0.16942
--	--	--	--	--	--	--	--	--	--	--	--	--	--	-0.43992	-0.33049	-0.43992	-0.27096	-0.43991	-0.17382
--	--	--	--	--	--	--	--	--	--	--	--	--	--	-0.44992	-0.3433	-0.44991	-0.2801	-0.44991	-0.1775
--	--	--	--	--	--	--	--	--	--	--	--	--	--	-0.45991	-0.35464	-0.45991	-0.28955	-0.45991	-0.18568
--	--	--	--	--	--	--	--	--	--	--	--	--	--	-0.46991	-0.36738	-0.46991	-0.30039	-0.46991	-0.18934
--	--	--	--	--	--	--	--	--	--	--	--	--	--	-0.4799	-0.38133	-0.4799	-0.31054	-0.4799	-0.19896
--	--	--	--	--	--	--	--	--	--	--	--	--	--	-0.4899	-0.39627	-0.48989	-0.32095	-0.48989	-0.20411
--	--	--	--	--	--	--	--	--	--	--	--	--	--	-0.49989	-0.40995	-0.49989	-0.33142	-0.49989	-0.21103
--	--	--	--	--	--	--	--	--	--	--	--	--	--	-0.50989	-0.42337	-0.50989	-0.34268	-0.50989	-0.21679
--	--	--	--	--	--	--	--	--	--	--	--	--	--	-0.51989	-0.43801	-0.51989	-0.35484	-0.51989	-0.22446
--	--	--	--	--	--	--	--	--	--	--	--	--	--	-0.52989	-0.45245	-0.52989	-0.3661	-0.52989	-0.22074
--	--	--	--	--	--	--	--	--	--	--	--	--	--	-0.53988	-0.46775	-0.53988	-0.37752	-0.53988	-0.23034
--	--	--	--	--	--	--	--	--	--	--	--	--	--	-0.54989	-0.48511	-0.54988	-0.39058	-0.54988	-0.23671
--	--	--	--	--	--	--	--	--	--	--	--	--	--	-0.55989	-0.49908	-0.55989	-0.4021	-0.55989	-0.24292
--	--	--	--	--	--	--	--	--	--	--	--	--	--	-0.56989	-0.52061	-0.56989	-0.41406	-0.56989	-0.24987
--	--	--	--	--	--	--	--	--	--	--	--	--	--	-0.57989	-0.53394	-0.57989	-0.4276	-0.57989	-0.25789
--	--	--	--	--	--	--	--	--	--	--	--	--	--	-0.5899	-0.55278	-0.58989	-0.43955	-0.58989	-0.26246
--	--	--	--	--	--	--	--	--	--	--	--	--	--	-0.5999	-0.56859	-0.5999	-0.4541	-0.59989	-0.26599

## Sheet: Sheet2
	300K		290K		280K		270K		260K		250K		240K		230K		220K		210K
-0.59991	-1.46532	-0.59991	-1.36404	-0.59992	-1.18837	-0.59992	-1.0339	-0.59992	-0.87973	-0.5999	-0.72817	-0.5999	-0.67327	-0.5999	-0.57343	-0.5999	-0.44987	-0.59991	-0.39039
-0.5499	-1.23562	-0.5499	-1.14933	-0.54991	-1.00723	-0.54991	-0.87709	-0.54991	-0.75318	-0.54989	-0.64319	-0.54989	-0.57927	-0.5899	-0.55831	-0.5899	-0.43549	-0.58989	-0.39195
-0.49991	-1.03621	-0.49991	-0.95981	-0.49992	-0.84875	-0.49991	-0.73893	-0.49992	-0.63715	-0.4999	-0.5443	-0.4999	-0.49478	-0.57989	-0.5431	-0.57989	-0.42506	-0.57989	-0.38315
-0.44993	-0.85848	-0.44994	-0.79248	-0.44994	-0.70642	-0.44994	-0.61668	-0.44993	-0.53248	-0.44992	-0.46409	-0.44992	-0.41546	-0.56989	-0.52854	-0.56989	-0.41495	-0.5699	-0.36364
-0.39993	-0.70019	-0.39994	-0.64512	-0.39994	-0.5806	-0.39994	-0.50541	-0.39994	-0.43951	-0.39992	-0.38169	-0.39992	-0.34709	-0.55989	-0.51242	-0.55989	-0.40127	-0.55988	-0.34971
-0.34992	-0.55726	-0.34993	-0.51439	-0.34993	-0.46592	-0.34993	-0.40654	-0.34993	-0.35785	-0.34992	-0.31192	-0.34991	-0.28533	-0.54989	-0.49668	-0.54989	-0.39156	-0.54989	-0.32931
-0.29992	-0.43177	-0.29993	-0.39956	-0.29993	-0.36676	-0.29993	-0.31981	-0.29993	-0.28505	-0.29992	-0.24899	-0.29992	-0.22911	-0.53988	-0.48295	-0.53989	-0.3796	-0.53989	-0.30439
-0.24989	-0.3245	-0.2499	-0.29964	-0.2499	-0.27806	-0.24989	-0.24378	-0.2499	-0.22054	-0.24988	-0.19323	-0.24988	-0.17905	-0.52989	-0.46563	-0.52989	-0.37082	-0.52988	-0.30132
-0.1999	-0.23289	-0.19991	-0.21474	-0.19991	-0.20324	-0.19991	-0.17787	-0.19991	-0.16335	-0.1999	-0.14469	-0.1999	-0.13459	-0.51989	-0.4517	-0.51989	-0.35987	-0.5199	-0.2936
-0.14993	-0.15663	-0.14993	-0.14397	-0.14993	-0.13901	-0.14993	-0.12141	-0.14993	-0.11423	-0.14993	-0.10196	-0.14993	-0.09502	-0.50989	-0.4377	-0.50989	-0.34818	-0.50989	-0.29599
-0.09993	-0.09391	-0.09993	-0.08619	-0.09994	-0.08475	-0.09993	-0.07457	-0.09993	-0.07128	-0.09992	-0.06418	-0.09992	-0.06048	-0.49989	-0.42346	-0.49989	-0.33954	-0.4999	-0.27653
-0.04993	-0.04343	-0.04993	-0.03974	-0.04993	-0.03966	-0.04993	-0.03505	-0.04993	-0.03405	-0.04992	-0.03077	-0.04992	-0.02945	-0.4899	-0.41002	-0.4899	-0.32972	-0.48988	-0.28909
9.09319e-05	0.00116	8.62138e-05	0.00116	8.70169e-05	0.000998207	9.08315e-05	0.000871826	9.45458e-05	0.000727454	0.00010478	0.000624742	9.65487e-05	0.000122759	-0.4799	-0.3954	-0.4799	-0.31893	-0.4799	-0.28052
0.0501	0.04407	0.0501	0.04105	0.05009	0.04047	0.0501	0.03578	0.05009	0.0342	0.0501	0.03109	0.0501	0.02968	-0.46991	-0.38442	-0.46991	-0.31048	-0.46991	-0.2453
0.10011	0.09367	0.1001	0.0869	0.1001	0.08514	0.1001	0.07575	0.1001	0.07251	0.1001	0.06589	0.1001	0.06241	-0.45991	-0.36976	-0.45991	-0.30055	-0.45991	-0.23098
0.1501	0.15062	0.15011	0.14205	0.15011	0.13782	0.1501	0.12252	0.1501	0.11608	0.15011	0.10546	0.15011	0.09954	-0.44992	-0.35709	-0.44992	-0.29166	-0.44991	-0.22467
0.20011	0.22153	0.2001	0.20875	0.2001	0.19885	0.2001	0.17746	0.2001	0.16536	0.20011	0.15008	0.20012	0.1419	-0.43992	-0.34412	-0.43992	-0.28095	-0.43992	-0.21596
0.25009	0.30483	0.25009	0.28799	0.25008	0.26986	0.25008	0.24248	0.25008	0.22307	0.25009	0.20237	0.25009	0.18852	-0.42992	-0.33206	-0.42992	-0.27134	-0.42992	-0.20837
0.30009	0.40172	0.30009	0.38203	0.30008	0.35221	0.30009	0.31735	0.30008	0.28883	0.30009	0.26182	0.30009	0.24286	-0.41992	-0.32023	-0.41992	-0.2623	-0.41992	-0.20137
0.35009	0.51399	0.35008	0.49049	0.35008	0.44643	0.35008	0.40422	0.35008	0.36255	0.35008	0.32726	0.35008	0.30429	-0.40992	-0.30887	-0.40992	-0.25353	-0.40992	-0.19588
0.40012	0.6383	0.40012	0.61306	0.40012	0.5515	0.40012	0.50064	0.40012	0.44411	0.40012	0.40282	0.40012	0.37208	-0.39992	-0.29696	-0.39992	-0.24668	-0.39992	-0.20407
0.45012	0.77741	0.45012	0.74829	0.45011	0.66832	0.45012	0.6074	0.45011	0.53414	0.45012	0.48453	0.45012	0.4469	-0.38992	-0.28748	-0.38992	-0.23782	-0.38992	-0.20755
0.50009	0.92556	0.50009	0.89511	0.50009	0.79289	0.50009	0.72429	0.50009	0.63416	0.50009	0.57372	0.50009	0.52971	-0.37992	-0.2769	-0.37992	-0.22958	-0.37991	-0.20108
0.55009	1.08378	0.55009	1.05337	0.55008	0.92724	0.55008	0.85114	0.55008	0.74021	0.55008	0.67187	0.55008	0.61924	-0.36992	-0.26584	-0.36992	-0.22104	-0.36991	-0.19668
0.60013	1.2511	0.60013	1.22016	0.60013	1.07001	0.60013	0.98659	0.60012	0.85517	0.60012	0.77776	0.60012	0.71664	-0.35991	-0.25589	-0.35991	-0.21276	-0.35991	-0.18574
0.65013	1.42433	0.65013	1.39417	0.65012	1.21963	0.65012	1.12958	0.65012	0.9819	0.65012	0.88979	0.65012	0.82061	-0.34991	-0.24484	-0.34991	-0.20455	-0.34991	-0.17343
0.70012	1.58372	0.70012	1.55802	0.70013	1.38103	0.70013	1.28474	0.70012	1.11169	0.70012	1.01122	0.70012	0.93526	-0.33991	-0.23468	-0.33991	-0.19658	-0.3399	-0.16973
0.75009	1.76993	0.75009	1.74856	0.75009	1.53214	0.75009	1.43003	0.7501	1.25179	0.7501	1.14237	0.7501	1.05388	-0.32992	-0.22535	-0.32992	-0.18881	-0.32992	-0.15854
0.80011	1.96115	0.80011	1.94725	0.80011	1.70843	0.80011	1.6013	0.80012	1.39777	0.80012	1.28437	0.80012	1.18409	-0.31992	-0.21618	-0.31992	-0.18126	-0.31992	-0.15392
0.85011	2.16812	0.85011	2.15211	0.85011	1.89107	0.85011	1.77873	0.85011	1.54067	0.85012	1.42748	0.85012	1.32298	-0.30992	-0.20719	-0.30992	-0.17494	-0.30992	-0.1456
0.90011	2.37465	0.90011	2.36303	0.90011	2.08298	0.90011	1.96661	0.90011	1.70555	0.9001	1.5738	0.9001	1.4672	-0.29991	-0.19883	-0.29991	-0.1676	-0.29991	-0.14345
0.95011	2.59171	0.95011	2.57947	0.95011	2.28298	0.95011	2.16024	0.95011	1.87827	0.95011	1.73222	0.95011	1.62658	-0.28991	-0.18906	-0.28991	-0.16095	-0.28991	-0.13535
1.00015	2.81382	1.00015	2.8057	1.00015	2.48757	1.00015	2.36064	1.00015	2.06185	1.00014	1.90439	1.00014	1.79465	-0.27991	-0.18078	-0.27991	-0.15409	-0.27991	-0.13009
1.05013	3.0561	1.05013	3.03558	1.05013	2.69785	1.05013	2.57115	1.05013	2.25342	1.05012	2.08709	1.05012	1.97842	-0.26991	-0.17233	-0.26991	-0.14709	-0.26991	-0.1292
1.10012	3.28434	1.10013	3.29154	1.10012	2.92227	1.10012	2.78625	1.10012	2.45386	1.10012	2.27985	1.10012	2.16652	-0.25991	-0.16412	-0.25991	-0.14008	-0.25991	-0.12163
1.15016	3.54267	1.15016	3.53703	1.15016	3.14825	1.15016	3.0223	1.15016	2.67461	1.15016	2.4772	1.15016	2.3633	-0.24988	-0.15595	-0.24988	-0.1336	-0.24988	-0.11649
1.20016	3.81044	1.20016	3.80056	1.20016	3.38308	1.20016	3.24714	1.20016	2.89581	1.20015	2.69053	1.20015	2.57694	-0.23988	-0.14832	-0.23989	-0.12712	-0.23988	-0.11201
1.25015	4.07753	1.25016	4.08102	1.25016	3.63833	1.25016	3.48773	1.25016	3.11701	1.25015	2.91223	1.25015	2.80159	-0.22989	-0.14016	-0.22989	-0.12053	-0.2299	-0.10527
1.30013	4.35511	1.30013	4.36712	1.30013	3.90669	1.30013	3.74543	1.30013	3.36061	1.30012	3.12763	1.30012	3.03716	-0.21989	-0.13274	-0.21989	-0.11499	-0.21989	-0.09947
1.30013	4.33189	1.30013	4.31995	1.30013	3.86653	1.30013	3.71732	1.30013	3.34056	1.30012	3.07666	1.30012	3.01351	-0.20989	-0.12525	-0.2099	-0.10867	-0.20991	-0.09431
1.25015	3.99241	1.25016	3.99059	1.25016	3.54585	1.25016	3.39888	1.25016	3.05418	1.25015	2.7909	1.25015	2.72705	-0.1999	-0.11806	-0.1999	-0.10266	-0.1999	-0.09061
1.20016	3.67832	1.20016	3.67014	1.20016	3.25987	1.20016	3.11806	1.20016	2.7795	1.20015	2.57701	1.20015	2.48006	-0.18992	-0.1109	-0.18992	-0.09657	-0.18991	-0.08525
1.15016	3.39141	1.15016	3.36734	1.15016	2.99251	1.15016	2.84441	1.15016	2.53446	1.15016	2.34151	1.15015	2.24931	-0.17992	-0.10428	-0.17992	-0.09108	-0.17991	-0.08015
1.10012	3.12022	1.10012	3.08789	1.10012	2.73669	1.10012	2.59457	1.10012	2.30837	1.10012	2.12556	1.10012	2.03659	-0.16992	-0.09734	-0.16992	-0.08535	-0.16992	-0.07686
1.05013	2.86283	1.05013	2.82938	1.05013	2.5057	1.05013	2.35629	1.05013	2.10015	1.05012	1.92682	1.05012	1.83967	-0.15992	-0.09096	-0.15992	-0.07971	-0.15992	-0.07202
1.00015	2.61485	1.00015	2.57524	1.00015	2.27912	1.00015	2.14167	1.00015	1.89723	1.00014	1.74463	1.00014	1.66146	-0.14993	-0.08462	-0.14992	-0.07436	-0.14992	-0.06734
0.95011	2.38001	0.95011	2.34394	0.95011	2.07285	0.95011	1.93864	0.95011	1.71838	0.95011	1.57682	0.95011	1.49135	-0.13993	-0.07827	-0.13993	-0.06888	-0.13993	-0.06297
0.90011	2.15687	0.90011	2.12409	0.90011	1.87405	0.90011	1.75138	0.90011	1.54532	0.9001	1.41713	0.9001	1.33754	-0.12992	-0.07196	-0.12993	-0.0638	-0.12993	-0.05676
0.85011	1.95365	0.85011	1.91346	0.85011	1.69407	0.85011	1.57599	0.85011	1.38963	0.85011	1.2687	0.85011	1.19042	-0.11992	-0.06594	-0.11992	-0.05849	-0.11992	-0.05217
0.80011	1.75922	0.80011	1.72039	0.80011	1.5202	0.80011	1.40697	0.80011	1.24031	0.80011	1.12597	0.80012	1.0618	-0.10992	-0.0599	-0.10992	-0.05334	-0.10992	-0.0479
0.75009	1.57652	0.75009	1.53767	0.75009	1.35729	0.7501	1.25161	0.7501	1.09946	0.7501	0.98283	0.7501	0.93962	-0.09992	-0.05407	-0.09992	-0.04832	-0.09992	-0.04241
0.70012	1.40488	0.70012	1.36838	0.70011	1.20235	0.70013	1.10809	0.70012	0.96993	0.70012	0.89325	0.70012	0.82593	-0.08992	-0.04834	-0.08992	-0.04342	-0.08992	-0.03873
0.65012	1.24093	0.65011	1.20435	0.65012	1.05997	0.65012	0.97152	0.65012	0.85258	0.65012	0.77698	0.65012	0.72033	-0.07991	-0.04307	-0.07991	-0.03838	-0.07991	-0.03479
0.60013	1.09138	0.60013	1.05344	0.60012	0.92291	0.60013	0.84773	0.60012	0.7413	0.60012	0.67517	0.60012	0.62382	-0.06991	-0.03754	-0.06991	-0.0336	-0.06991	-0.03028
0.55008	0.94555	0.55008	0.91072	0.55008	0.79992	0.55008	0.7324	0.55008	0.63909	0.55008	0.58354	0.55008	0.53627	-0.05992	-0.03202	-0.05992	-0.02885	-0.05992	-0.02639
0.50009	0.81074	0.50009	0.78074	0.50009	0.68562	0.50009	0.62386	0.50009	0.54487	0.50009	0.49772	0.50009	0.45713	-0.04992	-0.02677	-0.04992	-0.02401	-0.04992	-0.02215
0.45012	0.68584	0.45012	0.65727	0.45011	0.57937	0.45011	0.52492	0.45011	0.45787	0.45011	0.41833	0.45012	0.38471	-0.03992	-0.02139	-0.03992	-0.01929	-0.03992	-0.0179
0.40012	0.56987	0.40012	0.54424	0.40012	0.48131	0.40012	0.43415	0.40012	0.38008	0.40012	0.34827	0.40012	0.31849	-0.02991	-0.01612	-0.02991	-0.01455	-0.02991	-0.01345
0.35009	0.4636	0.35008	0.43993	0.35008	0.39097	0.35008	0.35253	0.35008	0.3088	0.35008	0.2834	0.35008	0.26001	-0.01992	-0.01084	-0.01992	-0.0098	-0.01992	-0.00907
0.30009	0.36717	0.30009	0.34783	0.30008	0.31028	0.30008	0.27836	0.30008	0.24548	0.30009	0.22628	0.30009	0.20728	-0.00991	-0.00559	-0.00991	-0.00511	-0.00991	-0.00467
0.25009	0.28211	0.25009	0.26608	0.25008	0.23802	0.25008	0.21296	0.25008	0.18966	0.25009	0.17511	0.25009	0.16042	7.54682e-05	-0.000566737	7.62713e-05	-0.000573696	8.00859e-05	-0.000490317
0.20011	0.20727	0.2001	0.19422	0.2001	0.17531	0.2001	0.15675	0.2001	0.14042	0.20011	0.12947	0.20011	0.11932	0.0101	0.00496	0.0101	0.00438	0.0101	0.00405
0.1501	0.14234	0.15009	0.13331	0.15009	0.12118	0.1501	0.10813	0.1501	0.09782	0.15011	0.09063	0.15011	0.08333	0.02011	0.01031	0.02011	0.00921	0.02011	0.00853
0.1001	0.08779	0.1001	0.08195	0.1001	0.07507	0.1001	0.06663	0.10009	0.06082	0.1001	0.05637	0.1001	0.05202	0.0301	0.01575	0.03011	0.01412	0.03011	0.01306
0.0501	0.04139	0.0501	0.03851	0.05009	0.03539	0.05009	0.03123	0.05009	0.02869	0.0501	0.02646	0.0501	0.02432	0.0401	0.02127	0.0401	0.0191	0.0401	0.01748
7.38665e-05	-0.000668557	6.96504e-05	-0.000629429	6.90481e-05	-0.000568486	6.53338e-05	-0.000637223	6.98511e-05	-0.000568063	7.91824e-05	-0.000555705	7.80782e-05	-0.000637429	0.0501	0.02689	0.0501	0.0252	0.0501	0.02194
-0.04993	-0.04328	-0.04993	-0.04013	-0.04993	-0.03703	-0.04993	-0.03265	-0.04993	-0.02985	-0.04992	-0.0276	-0.04992	-0.02511	0.0601	0.03261	0.0601	0.03071	0.0601	0.02664
-0.09993	-0.09293	-0.09993	-0.08628	-0.09993	-0.07913	-0.09993	-0.06954	-0.09993	-0.06261	-0.09992	-0.05709	-0.09992	-0.05157	0.0701	0.03842	0.0701	0.03616	0.07009	0.03146
-0.14993	-0.15443	-0.14994	-0.14366	-0.14994	-0.12953	-0.14994	-0.11356	-0.14994	-0.10095	-0.14993	-0.09095	-0.14992	-0.0823	0.0801	0.04441	0.0801	0.04174	0.0801	0.03617
-0.1999	-0.22932	-0.19991	-0.21506	-0.19991	-0.19181	-0.19991	-0.16832	-0.19991	-0.14735	-0.19991	-0.13074	-0.1999	-0.11706	0.0901	0.05064	0.0901	0.04741	0.0901	0.04104
-0.24989	-0.32113	-0.2499	-0.30212	-0.2499	-0.26568	-0.2499	-0.23366	-0.2499	-0.20099	-0.24988	-0.17972	-0.24988	-0.15854	0.1001	0.05694	0.1001	0.05324	0.1001	0.04684
-0.29992	-0.43104	-0.29993	-0.40694	-0.29993	-0.35315	-0.29993	-0.30989	-0.29993	-0.26373	-0.29992	-0.23481	-0.29991	-0.20402	0.11011	0.06299	0.11011	0.05928	0.11011	0.05167
-0.34993	-0.55933	-0.34993	-0.52937	-0.34993	-0.4529	-0.34993	-0.39826	-0.34993	-0.33626	-0.34992	-0.29722	-0.34991	-0.25718	0.12011	0.0697	0.12011	0.06531	0.12011	0.05782
-0.39993	-0.71212	-0.39994	-0.67437	-0.39994	-0.57057	-0.39994	-0.50097	-0.39994	-0.41905	-0.39992	-0.36935	-0.39992	-0.31854	0.13011	0.07655	0.13011	0.07159	0.13011	0.06321
-0.44993	-0.88631	-0.44994	-0.83903	-0.44994	-0.7047	-0.44994	-0.6182	-0.44994	-0.51318	-0.44992	-0.45137	-0.44992	-0.38562	0.14011	0.08342	0.14011	0.07811	0.14011	0.06847
-0.49991	-1.08357	-0.49992	-1.02796	-0.49992	-0.85554	-0.49992	-0.75123	-0.49992	-0.61753	-0.4999	-0.54251	-0.49989	-0.4619	0.15011	0.0906	0.15011	0.08459	0.15011	0.07486
-0.5499	-1.30594	-0.54991	-1.24246	-0.54991	-1.0261	-0.54991	-0.90125	-0.54991	-0.73825	-0.54989	-0.64747	-0.54989	-0.54933	0.16011	0.09766	0.16011	0.09141	0.1601	0.08083
-0.59991	-1.5519	-0.59991	-1.47389	-0.59993	-1.22197	-0.59992	-1.0701	-0.59992	-0.87376	-0.5999	-0.76506	-0.5999	-0.6506	0.17011	0.10488	0.17011	0.0982	0.17011	0.08525
--	--	--	--	--	--	--	--	--	--	--	--	--	--	0.1801	0.1128	0.1801	0.10512	0.1801	0.09094
--	--	--	--	--	--	--	--	--	--	--	--	--	--	0.1901	0.12046	0.1901	0.11242	0.1901	0.09753
--	--	--	--	--	--	--	--	--	--	--	--	--	--	0.20012	0.12873	0.20012	0.11965	0.20012	0.09139
--	--	--	--	--	--	--	--	--	--	--	--	--	--	0.21012	0.13684	0.21012	0.12703	0.21011	0.09466
--	--	--	--	--	--	--	--	--	--	--	--	--	--	0.2201	0.14486	0.22012	0.13502	0.22011	0.10175
--	--	--	--	--	--	--	--	--	--	--	--	--	--	0.2301	0.15344	0.23011	0.14298	0.23011	0.10769
--	--	--	--	--	--	--	--	--	--	--	--	--	--	0.2401	0.16214	0.2401	0.15029	0.24011	0.11321
--	--	--	--	--	--	--	--	--	--	--	--	--	--	0.25009	0.171	0.25009	0.15602	0.2501	0.11908
--	--	--	--	--	--	--	--	--	--	--	--	--	--	0.26009	0.18028	0.26009	0.16247	0.2601	0.12536
--	--	--	--	--	--	--	--	--	--	--	--	--	--	0.27009	0.18962	0.27009	0.16448	0.27009	0.13625
--	--	--	--	--	--	--	--	--	--	--	--	--	--	0.28009	0.20015	0.28009	0.17205	0.28009	0.13979
--	--	--	--	--	--	--	--	--	--	--	--	--	--	0.29009	0.20935	0.29009	0.19328	0.29009	0.14528
--	--	--	--	--	--	--	--	--	--	--	--	--	--	0.30009	0.21983	0.30009	0.18938	0.30009	0.15134
--	--	--	--	--	--	--	--	--	--	--	--	--	--	0.31009	0.23013	0.31009	0.21347	0.31009	0.18383
--	--	--	--	--	--	--	--	--	--	--	--	--	--	0.32009	0.24095	0.32009	0.22305	0.32009	0.19417
--	--	--	--	--	--	--	--	--	--	--	--	--	--	0.33009	0.25155	0.33009	0.23282	0.33009	0.20393
--	--	--	--	--	--	--	--	--	--	--	--	--	--	0.34008	0.26233	0.34008	0.24274	0.34008	0.21351
--	--	--	--	--	--	--	--	--	--	--	--	--	--	0.35008	0.27372	0.35008	0.25312	0.35008	0.22232
--	--	--	--	--	--	--	--	--	--	--	--	--	--	0.36009	0.28451	0.36008	0.26341	0.36008	0.19284
--	--	--	--	--	--	--	--	--	--	--	--	--	--	0.37009	0.29638	0.37009	0.27394	0.37009	0.1977
--	--	--	--	--	--	--	--	--	--	--	--	--	--	0.38009	0.30925	0.38009	0.26458	0.38009	0.2051
--	--	--	--	--	--	--	--	--	--	--	--	--	--	0.39012	0.32081	0.39012	0.27189	0.39012	0.20871
--	--	--	--	--	--	--	--	--	--	--	--	--	--	0.40012	0.33331	0.40012	0.28176	0.40012	0.21337
--	--	--	--	--	--	--	--	--	--	--	--	--	--	0.41013	0.34623	0.41012	0.29152	0.41012	0.22228
--	--	--	--	--	--	--	--	--	--	--	--	--	--	0.42012	0.35885	0.42012	0.30284	0.42012	0.28521
--	--	--	--	--	--	--	--	--	--	--	--	--	--	0.43012	0.37248	0.43012	0.31235	0.43012	0.29579
--	--	--	--	--	--	--	--	--	--	--	--	--	--	0.44012	0.38625	0.44012	0.32503	0.44012	0.29882
--	--	--	--	--	--	--	--	--	--	--	--	--	--	0.45012	0.40007	0.45011	0.33568	0.45011	0.27741
--	--	--	--	--	--	--	--	--	--	--	--	--	--	0.46011	0.41532	0.46011	0.34799	0.46011	0.31357
--	--	--	--	--	--	--	--	--	--	--	--	--	--	0.47011	0.4291	0.47011	0.3604	0.4701	0.3265
--	--	--	--	--	--	--	--	--	--	--	--	--	--	0.4801	0.44257	0.4801	0.37196	0.4801	0.34413
--	--	--	--	--	--	--	--	--	--	--	--	--	--	0.49009	0.45695	0.49009	0.38432	0.49009	0.35178
--	--	--	--	--	--	--	--	--	--	--	--	--	--	0.50009	0.47335	0.50009	0.39622	0.50009	0.34797
--	--	--	--	--	--	--	--	--	--	--	--	--	--	0.51009	0.48896	0.51009	0.40853	0.51009	0.36641
--	--	--	--	--	--	--	--	--	--	--	--	--	--	0.52009	0.50359	0.52008	0.41931	0.52008	0.37937
--	--	--	--	--	--	--	--	--	--	--	--	--	--	0.53008	0.51988	0.53008	0.43337	0.53008	0.39773
--	--	--	--	--	--	--	--	--	--	--	--	--	--	0.54008	0.53681	0.54008	0.44483	0.54007	0.41125
--	--	--	--	--	--	--	--	--	--	--	--	--	--	0.55008	0.55346	0.55008	0.45892	0.55008	0.42574
--	--	--	--	--	--	--	--	--	--	--	--	--	--	0.56008	0.57124	0.56008	0.47326	0.56009	0.44145
--	--	--	--	--	--	--	--	--	--	--	--	--	--	0.57008	0.58751	0.57008	0.4867	0.57008	0.43501
--	--	--	--	--	--	--	--	--	--	--	--	--	--	0.58012	0.60518	0.58012	0.50297	0.58012	0.44984
--	--	--	--	--	--	--	--	--	--	--	--	--	--	0.59012	0.62308	0.59012	0.51546	0.59012	0.45942
--	--	--	--	--	--	--	--	--	--	--	--	--	--	0.60012	0.64335	0.60012	0.52946	0.60012	0.46087
--	--	--	--	--	--	--	--	--	--	--	--	--	--	0.61011	0.66106	0.61011	0.53966	0.61011	0.48059
--	--	--	--	--	--	--	--	--	--	--	--	--	--	0.62011	0.67903	0.62011	0.5536	0.62011	0.49317
--	--	--	--	--	--	--	--	--	--	--	--	--	--	0.63012	0.69787	0.63011	0.56996	0.63011	0.50678
--	--	--	--	--	--	--	--	--	--	--	--	--	--	0.64012	0.71653	0.64012	0.58222	0.64012	0.53979
--	--	--	--	--	--	--	--	--	--	--	--	--	--	0.65012	0.73528	0.65012	0.59619	0.65012	0.55565
--	--	--	--	--	--	--	--	--	--	--	--	--	--	0.66012	0.75606	0.66012	0.61217	0.66011	0.56943
--	--	--	--	--	--	--	--	--	--	--	--	--	--	0.67012	0.77805	0.67012	0.62566	0.67012	0.59091
--	--	--	--	--	--	--	--	--	--	--	--	--	--	0.68013	0.79884	0.68012	0.64486	0.68012	0.60384
--	--	--	--	--	--	--	--	--	--	--	--	--	--	0.69013	0.81853	0.69012	0.66002	0.69012	0.59427
--	--	--	--	--	--	--	--	--	--	--	--	--	--	0.70012	0.83829	0.70012	0.67328	0.70012	0.60476
--	--	--	--	--	--	--	--	--	--	--	--	--	--	0.71012	0.86087	0.71012	0.688	0.71011	0.61779
--	--	--	--	--	--	--	--	--	--	--	--	--	--	0.72012	0.88257	0.72012	0.70664	0.72012	0.63474
--	--	--	--	--	--	--	--	--	--	--	--	--	--	0.73012	0.9044	0.73011	0.71927	0.73011	0.64019
--	--	--	--	--	--	--	--	--	--	--	--	--	--	0.74011	0.92672	0.74011	0.74073	0.74011	0.66421
--	--	--	--	--	--	--	--	--	--	--	--	--	--	0.7501	0.95006	0.7501	0.75595	0.7501	0.70775
--	--	--	--	--	--	--	--	--	--	--	--	--	--	0.7601	0.97313	0.76009	0.76978	0.7601	0.71568
--	--	--	--	--	--	--	--	--	--	--	--	--	--	0.77013	0.99635	0.77012	0.79189	0.77012	0.72989
--	--	--	--	--	--	--	--	--	--	--	--	--	--	0.78012	1.02015	0.78012	0.80612	0.78012	0.76188
--	--	--	--	--	--	--	--	--	--	--	--	--	--	0.79012	1.04356	0.79012	0.82263	0.79012	0.78771
--	--	--	--	--	--	--	--	--	--	--	--	--	--	0.80012	1.07	0.80012	0.8444	0.80013	0.78986
--	--	--	--	--	--	--	--	--	--	--	--	--	--	0.81012	1.09307	0.81011	0.8581	0.81011	0.81031
--	--	--	--	--	--	--	--	--	--	--	--	--	--	0.82012	1.1167	0.82011	0.88411	0.82011	0.82733
--	--	--	--	--	--	--	--	--	--	--	--	--	--	0.83012	1.14183	0.83012	0.89815	0.83011	0.80594
--	--	--	--	--	--	--	--	--	--	--	--	--	--	0.84012	1.1674	0.84011	0.91253	0.84012	0.86083
--	--	--	--	--	--	--	--	--	--	--	--	--	--	0.85012	1.19377	0.85012	0.93216	0.85012	0.86841
--	--	--	--	--	--	--	--	--	--	--	--	--	--	0.86012	1.22108	0.86012	0.94887	0.86011	0.85978
--	--	--	--	--	--	--	--	--	--	--	--	--	--	0.87012	1.24698	0.87012	0.96597	0.87012	0.88214
--	--	--	--	--	--	--	--	--	--	--	--	--	--	0.88012	1.27319	0.88012	0.9728	0.88012	0.90235
--	--	--	--	--	--	--	--	--	--	--	--	--	--	0.89011	1.30203	0.89011	0.99431	0.89011	0.91267
--	--	--	--	--	--	--	--	--	--	--	--	--	--	0.90011	1.32804	0.90011	1.01318	0.90011	0.96956
--	--	--	--	--	--	--	--	--	--	--	--	--	--	0.91012	1.3552	0.91011	1.03567	0.91011	0.97856
--	--	--	--	--	--	--	--	--	--	--	--	--	--	0.92012	1.39019	0.92011	1.06323	0.92011	0.97181
--	--	--	--	--	--	--	--	--	--	--	--	--	--	0.93012	1.41847	0.93012	1.08912	0.93012	0.99649
--	--	--	--	--	--	--	--	--	--	--	--	--	--	0.94011	1.44234	0.94012	1.10844	0.94012	1.01241
--	--	--	--	--	--	--	--	--	--	--	--	--	--	0.95011	1.46726	0.95012	1.13019	0.95011	1.039
--	--	--	--	--	--	--	--	--	--	--	--	--	--	0.96015	1.49874	0.96016	1.14877	0.96016	1.06965
--	--	--	--	--	--	--	--	--	--	--	--	--	--	0.97014	1.52778	0.97016	1.16686	0.97016	1.12141
--	--	--	--	--	--	--	--	--	--	--	--	--	--	0.98014	1.55793	0.98015	1.19606	0.98015	1.13854
--	--	--	--	--	--	--	--	--	--	--	--	--	--	0.99014	1.5864	0.99016	1.21495	0.99017	1.16268
--	--	--	--	--	--	--	--	--	--	--	--	--	--	1.00014	1.61726	1.00015	1.23783	1.00015	1.18779
--	--	--	--	--	--	--	--	--	--	--	--	--	--	1.01014	1.64838	1.01015	1.27923	1.01016	1.16759
--	--	--	--	--	--	--	--	--	--	--	--	--	--	1.02013	1.68339	1.02014	1.29757	1.02014	1.20808
--	--	--	--	--	--	--	--	--	--	--	--	--	--	1.03013	1.71489	1.03013	1.32377	1.03013	1.22489
--	--	--	--	--	--	--	--	--	--	--	--	--	--	1.04012	1.75059	1.04014	1.34973	1.04012	1.19551
--	--	--	--	--	--	--	--	--	--	--	--	--	--	1.05012	1.78183	1.05013	1.36462	1.05015	1.25249
--	--	--	--	--	--	--	--	--	--	--	--	--	--	1.06012	1.81481	1.06013	1.38847	1.06014	1.23229
--	--	--	--	--	--	--	--	--	--	--	--	--	--	1.07012	1.84772	1.07013	1.40484	1.07013	1.28456
--	--	--	--	--	--	--	--	--	--	--	--	--	--	1.08012	1.88372	1.08012	1.43256	1.08013	1.30751
--	--	--	--	--	--	--	--	--	--	--	--	--	--	1.09012	1.91803	1.09011	1.44293	1.09013	1.36868
--	--	--	--	--	--	--	--	--	--	--	--	--	--	1.10012	1.95044	1.10012	1.47536	1.10012	1.40323
--	--	--	--	--	--	--	--	--	--	--	--	--	--	1.11012	1.98521	1.11012	1.48664	1.11013	1.4367
--	--	--	--	--	--	--	--	--	--	--	--	--	--	1.12012	2.0214	1.12012	1.5148	1.12011	1.45993
--	--	--	--	--	--	--	--	--	--	--	--	--	--	1.13012	2.05249	1.13012	1.54183	1.13012	1.47007
--	--	--	--	--	--	--	--	--	--	--	--	--	--	1.14012	2.08996	1.14012	1.53832	1.14012	1.12831
--	--	--	--	--	--	--	--	--	--	--	--	--	--	1.15015	2.12357	1.15015	1.58697	1.15016	1.13106
--	--	--	--	--	--	--	--	--	--	--	--	--	--	1.16014	2.16526	1.16014	1.60655	1.16014	1.21579
--	--	--	--	--	--	--	--	--	--	--	--	--	--	1.17015	2.19656	1.17015	1.62356	1.17014	1.3628
--	--	--	--	--	--	--	--	--	--	--	--	--	--	1.18015	2.2366	1.18015	1.64907	1.18015	1.70627
--	--	--	--	--	--	--	--	--	--	--	--	--	--	1.19015	2.27495	1.19015	1.66857	1.19015	1.7378
--	--	--	--	--	--	--	--	--	--	--	--	--	--	1.20015	2.31122	1.20015	1.70868	1.20015	1.77139
--	--	--	--	--	--	--	--	--	--	--	--	--	--	1.21015	2.35321	1.21015	1.74336	1.21015	1.80538
--	--	--	--	--	--	--	--	--	--	--	--	--	--	1.22015	2.39128	1.22015	1.77022	1.22015	1.85182
--	--	--	--	--	--	--	--	--	--	--	--	--	--	1.23015	2.43239	1.23015	1.79431	1.23015	1.8539
--	--	--	--	--	--	--	--	--	--	--	--	--	--	1.24015	2.47253	1.24015	1.82927	1.24015	1.27352
--	--	--	--	--	--	--	--	--	--	--	--	--	--	1.25015	2.51289	1.25015	1.85088	1.25014	1.32448
--	--	--	--	--	--	--	--	--	--	--	--	--	--	1.26014	2.55373	1.26014	1.88178	1.26015	1.39132
--	--	--	--	--	--	--	--	--	--	--	--	--	--	1.27014	2.60397	1.27014	1.90443	1.27014	1.20802
--	--	--	--	--	--	--	--	--	--	--	--	--	--	1.28014	2.6398	1.28013	1.9491	1.28013	1.19301
--	--	--	--	--	--	--	--	--	--	--	--	--	--	1.29013	2.67825	1.29013	1.98095	1.29013	1.19618
--	--	--	--	--	--	--	--	--	--	--	--	--	--	1.30012	2.72645	1.30012	1.98939	1.30011	1.22284
--	--	--	--	--	--	--	--	--	--	--	--	--	--	1.30012	2.71138	1.30012	1.99449	1.30012	1.31877
--	--	--	--	--	--	--	--	--	--	--	--	--	--	1.29013	2.66385	1.29013	1.94707	1.29013	1.27682
--	--	--	--	--	--	--	--	--	--	--	--	--	--	1.28014	2.61122	1.28013	1.91132	1.28013	1.30782
--	--	--	--	--	--	--	--	--	--	--	--	--	--	1.27014	2.5679	1.27014	1.88537	1.27014	1.35095
--	--	--	--	--	--	--	--	--	--	--	--	--	--	1.26014	2.51518	1.26014	1.83563	1.26014	1.31385
--	--	--	--	--	--	--	--	--	--	--	--	--	--	1.25015	2.46958	1.25015	1.82042	1.25015	1.35976
--	--	--	--	--	--	--	--	--	--	--	--	--	--	1.24015	2.42482	1.24015	1.79916	1.24015	1.35144
--	--	--	--	--	--	--	--	--	--	--	--	--	--	1.23015	2.38003	1.23015	1.76512	1.23016	1.31517
--	--	--	--	--	--	--	--	--	--	--	--	--	--	1.22015	2.33102	1.22015	1.73365	1.22015	1.23815
--	--	--	--	--	--	--	--	--	--	--	--	--	--	1.21015	2.28886	1.21015	1.71306	1.21015	1.27336
--	--	--	--	--	--	--	--	--	--	--	--	--	--	1.20015	2.24151	1.20015	1.68523	1.20013	1.16361
--	--	--	--	--	--	--	--	--	--	--	--	--	--	1.19015	2.19775	1.19015	1.66315	1.19015	1.80384
--	--	--	--	--	--	--	--	--	--	--	--	--	--	1.18015	2.15215	1.18015	1.6335	1.18015	1.7843
--	--	--	--	--	--	--	--	--	--	--	--	--	--	1.17015	2.11366	1.17015	1.60341	1.17014	1.73619
--	--	--	--	--	--	--	--	--	--	--	--	--	--	1.16015	2.07222	1.16015	1.5877	1.16015	1.71279
--	--	--	--	--	--	--	--	--	--	--	--	--	--	1.15015	2.03446	1.15015	1.55417	1.15015	1.60878
--	--	--	--	--	--	--	--	--	--	--	--	--	--	1.14012	1.99276	1.14012	1.53457	1.14012	0.83224
--	--	--	--	--	--	--	--	--	--	--	--	--	--	1.13012	1.95445	1.13012	1.50763	1.13013	0.79898
--	--	--	--	--	--	--	--	--	--	--	--	--	--	1.12012	1.91627	1.12012	1.47423	1.12013	0.76388
--	--	--	--	--	--	--	--	--	--	--	--	--	--	1.11012	1.87672	1.11012	1.45902	1.11012	0.79972
--	--	--	--	--	--	--	--	--	--	--	--	--	--	1.10012	1.83919	1.10012	1.42874	1.10012	0.77602
--	--	--	--	--	--	--	--	--	--	--	--	--	--	1.09012	1.80136	1.09012	1.40517	1.09013	0.73741
--	--	--	--	--	--	--	--	--	--	--	--	--	--	1.08011	1.76225	1.08011	1.3852	1.08011	0.73072
--	--	--	--	--	--	--	--	--	--	--	--	--	--	1.07012	1.72743	1.07012	1.34865	1.07013	0.73185
--	--	--	--	--	--	--	--	--	--	--	--	--	--	1.06012	1.6935	1.06012	1.32839	1.06013	0.70338
--	--	--	--	--	--	--	--	--	--	--	--	--	--	1.05012	1.66011	1.05012	1.29672	1.05012	0.72524
--	--	--	--	--	--	--	--	--	--	--	--	--	--	1.04012	1.62737	1.04012	1.27621	1.04013	0.72344
--	--	--	--	--	--	--	--	--	--	--	--	--	--	1.03013	1.59661	1.03013	1.25354	1.03014	0.7085
--	--	--	--	--	--	--	--	--	--	--	--	--	--	1.02012	1.56173	1.02013	1.21628	1.02013	0.70125
--	--	--	--	--	--	--	--	--	--	--	--	--	--	1.01014	1.53124	1.01014	1.20611	1.01014	0.70378
--	--	--	--	--	--	--	--	--	--	--	--	--	--	1.00014	1.50142	1.00014	1.17791	1.00015	0.68894
--	--	--	--	--	--	--	--	--	--	--	--	--	--	0.99014	1.46827	0.99014	1.15008	0.99015	0.68686
--	--	--	--	--	--	--	--	--	--	--	--	--	--	0.98014	1.43554	0.98014	1.1332	0.98015	0.68228
--	--	--	--	--	--	--	--	--	--	--	--	--	--	0.97014	1.4065	0.97015	1.10929	0.97015	0.67439
--	--	--	--	--	--	--	--	--	--	--	--	--	--	0.96015	1.37718	0.96015	1.0986	0.96015	0.66108
--	--	--	--	--	--	--	--	--	--	--	--	--	--	0.95011	1.34702	0.95012	1.07299	0.95011	0.65481
--	--	--	--	--	--	--	--	--	--	--	--	--	--	0.94011	1.32002	0.94012	1.05167	0.94011	0.633
--	--	--	--	--	--	--	--	--	--	--	--	--	--	0.93011	1.292	0.93011	1.03288	0.93011	0.59917
--	--	--	--	--	--	--	--	--	--	--	--	--	--	0.92011	1.26395	0.92011	1.00749	0.92011	0.59683
--	--	--	--	--	--	--	--	--	--	--	--	--	--	0.9101	1.23413	0.91011	0.98623	0.91011	0.58399
--	--	--	--	--	--	--	--	--	--	--	--	--	--	0.9001	1.20547	0.90011	0.96974	0.90011	0.57142
--	--	--	--	--	--	--	--	--	--	--	--	--	--	0.8901	1.18159	0.89011	0.94824	0.89011	0.55985
--	--	--	--	--	--	--	--	--	--	--	--	--	--	0.88011	1.15446	0.88012	0.9273	0.88012	0.55543
--	--	--	--	--	--	--	--	--	--	--	--	--	--	0.87011	1.12977	0.87012	0.90679	0.87011	0.54874
--	--	--	--	--	--	--	--	--	--	--	--	--	--	0.86012	1.10348	0.86012	0.88892	0.86011	0.54537
--	--	--	--	--	--	--	--	--	--	--	--	--	--	0.85012	1.07981	0.85011	0.87372	0.85012	0.5269
--	--	--	--	--	--	--	--	--	--	--	--	--	--	0.84012	1.05339	0.84012	0.8524	0.84011	0.517
--	--	--	--	--	--	--	--	--	--	--	--	--	--	0.83012	1.03171	0.83011	0.83957	0.8301	0.49772
--	--	--	--	--	--	--	--	--	--	--	--	--	--	0.82012	1.00762	0.82011	0.82107	0.82011	0.47306
--	--	--	--	--	--	--	--	--	--	--	--	--	--	0.81012	0.98235	0.81011	0.80341	0.81011	0.45947
--	--	--	--	--	--	--	--	--	--	--	--	--	--	0.80012	0.95865	0.80011	0.78865	0.80011	0.4628
--	--	--	--	--	--	--	--	--	--	--	--	--	--	0.79012	0.93555	0.79012	0.76806	0.79012	0.44766
--	--	--	--	--	--	--	--	--	--	--	--	--	--	0.78012	0.91373	0.78012	0.75058	0.78012	0.44372
--	--	--	--	--	--	--	--	--	--	--	--	--	--	0.77013	0.89108	0.77012	0.73427	0.77012	0.44073
--	--	--	--	--	--	--	--	--	--	--	--	--	--	0.76009	0.86814	0.76009	0.71417	0.76009	0.43796
--	--	--	--	--	--	--	--	--	--	--	--	--	--	0.7501	0.84845	0.7501	0.70102	0.7501	0.42683
--	--	--	--	--	--	--	--	--	--	--	--	--	--	0.74011	0.82644	0.74011	0.68647	0.7401	0.42004
--	--	--	--	--	--	--	--	--	--	--	--	--	--	0.73012	0.80504	0.73011	0.66896	0.73011	0.40917
--	--	--	--	--	--	--	--	--	--	--	--	--	--	0.72012	0.78471	0.72011	0.65599	0.72011	0.38994
--	--	--	--	--	--	--	--	--	--	--	--	--	--	0.71012	0.76431	0.71012	0.64118	0.71011	0.38468
--	--	--	--	--	--	--	--	--	--	--	--	--	--	0.70012	0.74516	0.70012	0.62343	0.70011	0.37957
--	--	--	--	--	--	--	--	--	--	--	--	--	--	0.69012	0.72772	0.69012	0.61018	0.69013	0.37206
--	--	--	--	--	--	--	--	--	--	--	--	--	--	0.68013	0.70618	0.68012	0.59348	0.68011	0.35508
--	--	--	--	--	--	--	--	--	--	--	--	--	--	0.67012	0.68689	0.67012	0.58161	0.67012	0.35096
--	--	--	--	--	--	--	--	--	--	--	--	--	--	0.66012	0.67001	0.66012	0.56737	0.66012	0.34843
--	--	--	--	--	--	--	--	--	--	--	--	--	--	0.65012	0.65197	0.65012	0.55165	0.65011	0.34746
--	--	--	--	--	--	--	--	--	--	--	--	--	--	0.64012	0.63334	0.64011	0.5372	0.64011	0.34359
--	--	--	--	--	--	--	--	--	--	--	--	--	--	0.63012	0.61538	0.63011	0.52426	0.63011	0.33304
--	--	--	--	--	--	--	--	--	--	--	--	--	--	0.62011	0.59666	0.62011	0.50999	0.62011	0.32895
--	--	--	--	--	--	--	--	--	--	--	--	--	--	0.61011	0.58111	0.61011	0.49746	0.61011	0.31229
--	--	--	--	--	--	--	--	--	--	--	--	--	--	0.60012	0.56249	0.60012	0.48284	0.60012	0.29991
--	--	--	--	--	--	--	--	--	--	--	--	--	--	0.59012	0.54653	0.59012	0.47011	0.59011	0.30159
--	--	--	--	--	--	--	--	--	--	--	--	--	--	0.58012	0.53002	0.58012	0.45795	0.58012	0.29343
--	--	--	--	--	--	--	--	--	--	--	--	--	--	0.57008	0.51406	0.57008	0.44434	0.57008	0.27751
--	--	--	--	--	--	--	--	--	--	--	--	--	--	0.56008	0.49902	0.56008	0.43258	0.56008	0.27335
--	--	--	--	--	--	--	--	--	--	--	--	--	--	0.55008	0.48455	0.55008	0.41946	0.55008	0.27248
--	--	--	--	--	--	--	--	--	--	--	--	--	--	0.54008	0.46924	0.54008	0.40689	0.54008	0.2651
--	--	--	--	--	--	--	--	--	--	--	--	--	--	0.53008	0.45449	0.53008	0.39607	0.53008	0.25855
--	--	--	--	--	--	--	--	--	--	--	--	--	--	0.52008	0.44035	0.52009	0.38319	0.52008	0.25148
--	--	--	--	--	--	--	--	--	--	--	--	--	--	0.51009	0.42593	0.51009	0.37138	0.51009	0.24672
--	--	--	--	--	--	--	--	--	--	--	--	--	--	0.50009	0.41276	0.50009	0.35968	0.50008	0.24206
--	--	--	--	--	--	--	--	--	--	--	--	--	--	0.49009	0.39963	0.49009	0.34765	0.49009	0.23255
--	--	--	--	--	--	--	--	--	--	--	--	--	--	0.4801	0.38667	0.4801	0.33688	0.4801	0.21616
--	--	--	--	--	--	--	--	--	--	--	--	--	--	0.47011	0.37381	0.4701	0.32661	0.47011	0.21277
--	--	--	--	--	--	--	--	--	--	--	--	--	--	0.46011	0.36092	0.46011	0.31525	0.46011	0.20844
--	--	--	--	--	--	--	--	--	--	--	--	--	--	0.45011	0.3482	0.45011	0.306	0.45011	0.20395
--	--	--	--	--	--	--	--	--	--	--	--	--	--	0.44012	0.33649	0.44012	0.29557	0.44012	0.20915
--	--	--	--	--	--	--	--	--	--	--	--	--	--	0.43012	0.3243	0.43012	0.28451	0.43011	0.20034
--	--	--	--	--	--	--	--	--	--	--	--	--	--	0.42012	0.3128	0.42012	0.27548	0.42012	0.19637
--	--	--	--	--	--	--	--	--	--	--	--	--	--	0.41012	0.30093	0.41013	0.26523	0.41012	0.20299
--	--	--	--	--	--	--	--	--	--	--	--	--	--	0.40012	0.28903	0.40012	0.25571	0.40012	0.25232
--	--	--	--	--	--	--	--	--	--	--	--	--	--	0.39012	0.27807	0.39012	0.24702	0.39012	0.21248
--	--	--	--	--	--	--	--	--	--	--	--	--	--	0.38009	0.26758	0.38009	0.23724	0.38009	0.16172
--	--	--	--	--	--	--	--	--	--	--	--	--	--	0.37009	0.25622	0.37009	0.22804	0.37008	0.15707
--	--	--	--	--	--	--	--	--	--	--	--	--	--	0.36008	0.24554	0.36008	0.21959	0.36008	0.1514
--	--	--	--	--	--	--	--	--	--	--	--	--	--	0.35008	0.23556	0.35008	0.21021	0.35008	0.14698
--	--	--	--	--	--	--	--	--	--	--	--	--	--	0.34008	0.22507	0.34008	0.20199	0.34008	0.14662
--	--	--	--	--	--	--	--	--	--	--	--	--	--	0.33009	0.21592	0.33009	0.19351	0.33009	0.1396
--	--	--	--	--	--	--	--	--	--	--	--	--	--	0.32009	0.20608	0.32009	0.18564	0.32009	0.13481
--	--	--	--	--	--	--	--	--	--	--	--	--	--	0.31009	0.19732	0.31009	0.17789	0.31009	0.13187
--	--	--	--	--	--	--	--	--	--	--	--	--	--	0.30009	0.18824	0.30009	0.16961	0.30009	0.12507
--	--	--	--	--	--	--	--	--	--	--	--	--	--	0.29009	0.17966	0.29009	0.16239	0.29009	0.11989
--	--	--	--	--	--	--	--	--	--	--	--	--	--	0.28009	0.17116	0.28009	0.15473	0.28009	0.11571
--	--	--	--	--	--	--	--	--	--	--	--	--	--	0.27009	0.16269	0.27009	0.14752	0.2701	0.11091
--	--	--	--	--	--	--	--	--	--	--	--	--	--	0.26009	0.15483	0.26009	0.14083	0.26009	0.10388
--	--	--	--	--	--	--	--	--	--	--	--	--	--	0.25009	0.14662	0.25009	0.13316	0.25011	0.09828
--	--	--	--	--	--	--	--	--	--	--	--	--	--	0.2401	0.13867	0.2401	0.1264	0.2401	0.09238
--	--	--	--	--	--	--	--	--	--	--	--	--	--	0.2301	0.13125	0.2301	0.11985	0.23011	0.08695
--	--	--	--	--	--	--	--	--	--	--	--	--	--	0.2201	0.1236	0.2201	0.11301	0.22011	0.08274
--	--	--	--	--	--	--	--	--	--	--	--	--	--	0.2101	0.11618	0.21012	0.10671	0.21011	0.07875
--	--	--	--	--	--	--	--	--	--	--	--	--	--	0.20012	0.10954	0.20012	0.10012	0.20012	0.07403
--	--	--	--	--	--	--	--	--	--	--	--	--	--	0.1901	0.10272	0.1901	0.09409	0.19009	0.06995
--	--	--	--	--	--	--	--	--	--	--	--	--	--	0.1801	0.09612	0.1801	0.08792	0.1801	0.06678
--	--	--	--	--	--	--	--	--	--	--	--	--	--	0.17011	0.08962	0.17011	0.0826	0.1701	0.06214
--	--	--	--	--	--	--	--	--	--	--	--	--	--	0.1601	0.0832	0.16011	0.07688	0.1601	0.05731
--	--	--	--	--	--	--	--	--	--	--	--	--	--	0.15011	0.07703	0.15011	0.07103	0.15011	0.0537
--	--	--	--	--	--	--	--	--	--	--	--	--	--	0.14011	0.07095	0.14011	0.06564	0.14011	0.04981
--	--	--	--	--	--	--	--	--	--	--	--	--	--	0.13011	0.06521	0.13011	0.06034	0.13011	0.04641
--	--	--	--	--	--	--	--	--	--	--	--	--	--	0.12011	0.05939	0.12011	0.0549	0.12011	0.04285
--	--	--	--	--	--	--	--	--	--	--	--	--	--	0.11011	0.05391	0.11011	0.04992	0.1101	0.03908
--	--	--	--	--	--	--	--	--	--	--	--	--	--	0.1001	0.04844	0.1001	0.04498	0.1001	0.03509
--	--	--	--	--	--	--	--	--	--	--	--	--	--	0.0901	0.04311	0.0901	0.03987	0.0901	0.03176
--	--	--	--	--	--	--	--	--	--	--	--	--	--	0.0801	0.03783	0.0801	0.03512	0.0801	0.02798
--	--	--	--	--	--	--	--	--	--	--	--	--	--	0.0701	0.0327	0.0701	0.03041	0.0701	0.02432
--	--	--	--	--	--	--	--	--	--	--	--	--	--	0.0601	0.02772	0.0601	0.0258	0.0601	0.02039
--	--	--	--	--	--	--	--	--	--	--	--	--	--	0.0501	0.02287	0.0501	0.02128	0.0501	0.01663
--	--	--	--	--	--	--	--	--	--	--	--	--	--	0.0401	0.01797	0.0401	0.01682	0.0401	0.01344
--	--	--	--	--	--	--	--	--	--	--	--	--	--	0.0301	0.0133	0.0301	0.01242	0.03011	0.00986
--	--	--	--	--	--	--	--	--	--	--	--	--	--	0.02011	0.00868	0.02011	0.00805	0.0201	0.0064
--	--	--	--	--	--	--	--	--	--	--	--	--	--	0.0101	0.00412	0.0101	0.00378	0.0101	0.00298
--	--	--	--	--	--	--	--	--	--	--	--	--	--	8.07885e-05	-0.000507997	8.23947e-05	-0.00053256	8.31978e-05	-0.000456499
--	--	--	--	--	--	--	--	--	--	--	--	--	--	-0.00991	-0.00493	-0.00991	-0.00466	-0.00991	-0.00371
--	--	--	--	--	--	--	--	--	--	--	--	--	--	-0.01992	-0.00945	-0.01992	-0.00887	-0.01991	-0.007
--	--	--	--	--	--	--	--	--	--	--	--	--	--	-0.02992	-0.014	-0.02992	-0.01311	-0.02992	-0.01028
--	--	--	--	--	--	--	--	--	--	--	--	--	--	-0.03992	-0.01859	-0.03991	-0.01735	-0.03992	-0.01355
--	--	--	--	--	--	--	--	--	--	--	--	--	--	-0.04992	-0.02318	-0.04992	-0.02164	-0.04991	-0.017
--	--	--	--	--	--	--	--	--	--	--	--	--	--	-0.05992	-0.02788	-0.05992	-0.02595	-0.05992	-0.02044
--	--	--	--	--	--	--	--	--	--	--	--	--	--	-0.06991	-0.03269	-0.06991	-0.03029	-0.06991	-0.0239
--	--	--	--	--	--	--	--	--	--	--	--	--	--	-0.07991	-0.03749	-0.07991	-0.03466	-0.07991	-0.02719
--	--	--	--	--	--	--	--	--	--	--	--	--	--	-0.08991	-0.04265	-0.08991	-0.03897	-0.08991	-0.0305
--	--	--	--	--	--	--	--	--	--	--	--	--	--	-0.09992	-0.04767	-0.09992	-0.04343	-0.09992	-0.03373
--	--	--	--	--	--	--	--	--	--	--	--	--	--	-0.10992	-0.05293	-0.10992	-0.04807	-0.10992	-0.03746
--	--	--	--	--	--	--	--	--	--	--	--	--	--	-0.11992	-0.05832	-0.11992	-0.05286	-0.11992	-0.04043
--	--	--	--	--	--	--	--	--	--	--	--	--	--	-0.12992	-0.06366	-0.12992	-0.05765	-0.12992	-0.04396
--	--	--	--	--	--	--	--	--	--	--	--	--	--	-0.13993	-0.0692	-0.13993	-0.06233	-0.13992	-0.04735
--	--	--	--	--	--	--	--	--	--	--	--	--	--	-0.14992	-0.0751	-0.14992	-0.06745	-0.14992	-0.05082
--	--	--	--	--	--	--	--	--	--	--	--	--	--	-0.15992	-0.08087	-0.15992	-0.0726	-0.15992	-0.05424
--	--	--	--	--	--	--	--	--	--	--	--	--	--	-0.16992	-0.08704	-0.16992	-0.07797	-0.16992	-0.05807
--	--	--	--	--	--	--	--	--	--	--	--	--	--	-0.17992	-0.09318	-0.17992	-0.08293	-0.17991	-0.06169
--	--	--	--	--	--	--	--	--	--	--	--	--	--	-0.18991	-0.09979	-0.18991	-0.08837	-0.18991	-0.06534
--	--	--	--	--	--	--	--	--	--	--	--	--	--	-0.1999	-0.10656	-0.1999	-0.09403	-0.1999	-0.06883
--	--	--	--	--	--	--	--	--	--	--	--	--	--	-0.2099	-0.11312	-0.2099	-0.09975	-0.20989	-0.07308
--	--	--	--	--	--	--	--	--	--	--	--	--	--	-0.2199	-0.12022	-0.2199	-0.10516	-0.21989	-0.07647
--	--	--	--	--	--	--	--	--	--	--	--	--	--	-0.2299	-0.12767	-0.22989	-0.11146	-0.2299	-0.0797
--	--	--	--	--	--	--	--	--	--	--	--	--	--	-0.2399	-0.13496	-0.23989	-0.11741	-0.23989	-0.08402
--	--	--	--	--	--	--	--	--	--	--	--	--	--	-0.24989	-0.14212	-0.24989	-0.12351	-0.24988	-0.08815
--	--	--	--	--	--	--	--	--	--	--	--	--	--	-0.25991	-0.15056	-0.25992	-0.13015	-0.25992	-0.09162
--	--	--	--	--	--	--	--	--	--	--	--	--	--	-0.26991	-0.15862	-0.26992	-0.13626	-0.26992	-0.09748
--	--	--	--	--	--	--	--	--	--	--	--	--	--	-0.27991	-0.16596	-0.27992	-0.14288	-0.27992	-0.10219
--	--	--	--	--	--	--	--	--	--	--	--	--	--	-0.28991	-0.17511	-0.28991	-0.15032	-0.28992	-0.10688
--	--	--	--	--	--	--	--	--	--	--	--	--	--	-0.29991	-0.1836	-0.29991	-0.15689	-0.29992	-0.11151
--	--	--	--	--	--	--	--	--	--	--	--	--	--	-0.30992	-0.19179	-0.30992	-0.16453	-0.30992	-0.11644
--	--	--	--	--	--	--	--	--	--	--	--	--	--	-0.31992	-0.20115	-0.31992	-0.17131	-0.31993	-0.12022
--	--	--	--	--	--	--	--	--	--	--	--	--	--	-0.32992	-0.21009	-0.32992	-0.17863	-0.32993	-0.12396
--	--	--	--	--	--	--	--	--	--	--	--	--	--	-0.33991	-0.21942	-0.33991	-0.18656	-0.33991	-0.12748
--	--	--	--	--	--	--	--	--	--	--	--	--	--	-0.34991	-0.2293	-0.34991	-0.19428	-0.34992	-0.13264
--	--	--	--	--	--	--	--	--	--	--	--	--	--	-0.35991	-0.23926	-0.35991	-0.20188	-0.35992	-0.13804
--	--	--	--	--	--	--	--	--	--	--	--	--	--	-0.36991	-0.25038	-0.36991	-0.20994	-0.36993	-0.14287
--	--	--	--	--	--	--	--	--	--	--	--	--	--	-0.37992	-0.26114	-0.37992	-0.21768	-0.37992	-0.14743
--	--	--	--	--	--	--	--	--	--	--	--	--	--	-0.38992	-0.27088	-0.38992	-0.22603	-0.38992	-0.15278
--	--	--	--	--	--	--	--	--	--	--	--	--	--	-0.39992	-0.28214	-0.39992	-0.2346	-0.39992	-0.15757
--	--	--	--	--	--	--	--	--	--	--	--	--	--	-0.40992	-0.29306	-0.40992	-0.24267	-0.40992	-0.15944
--	--	--	--	--	--	--	--	--	--	--	--	--	--	-0.41992	-0.30521	-0.41992	-0.25144	-0.41992	-0.16591
--	--	--	--	--	--	--	--	--	--	--	--	--	--	-0.42992	-0.31708	-0.42992	-0.26118	-0.42991	-0.16942
--	--	--	--	--	--	--	--	--	--	--	--	--	--	-0.43992	-0.33049	-0.43992	-0.27096	-0.43991	-0.17382
--	--	--	--	--	--	--	--	--	--	--	--	--	--	-0.44992	-0.3433	-0.44991	-0.2801	-0.44991	-0.1775
--	--	--	--	--	--	--	--	--	--	--	--	--	--	-0.45991	-0.35464	-0.45991	-0.28955	-0.45991	-0.18568
--	--	--	--	--	--	--	--	--	--	--	--	--	--	-0.46991	-0.36738	-0.46991	-0.30039	-0.46991	-0.18934
--	--	--	--	--	--	--	--	--	--	--	--	--	--	-0.4799	-0.38133	-0.4799	-0.31054	-0.4799	-0.19896
--	--	--	--	--	--	--	--	--	--	--	--	--	--	-0.4899	-0.39627	-0.48989	-0.32095	-0.48989	-0.20411
--	--	--	--	--	--	--	--	--	--	--	--	--	--	-0.49989	-0.40995	-0.49989	-0.33142	-0.49989	-0.21103
--	--	--	--	--	--	--	--	--	--	--	--	--	--	-0.50989	-0.42337	-0.50989	-0.34268	-0.50989	-0.21679
--	--	--	--	--	--	--	--	--	--	--	--	--	--	-0.51989	-0.43801	-0.51989	-0.35484	-0.51989	-0.22446
--	--	--	--	--	--	--	--	--	--	--	--	--	--	-0.52989	-0.45245	-0.52989	-0.3661	-0.52989	-0.22074
--	--	--	--	--	--	--	--	--	--	--	--	--	--	-0.53988	-0.46775	-0.53988	-0.37752	-0.53988	-0.23034
--	--	--	--	--	--	--	--	--	--	--	--	--	--	-0.54989	-0.48511	-0.54988	-0.39058	-0.54988	-0.23671
--	--	--	--	--	--	--	--	--	--	--	--	--	--	-0.55989	-0.49908	-0.55989	-0.4021	-0.55989	-0.24292
--	--	--	--	--	--	--	--	--	--	--	--	--	--	-0.56989	-0.52061	-0.56989	-0.41406	-0.56989	-0.24987
--	--	--	--	--	--	--	--	--	--	--	--	--	--	-0.57989	-0.53394	-0.57989	-0.4276	-0.57989	-0.25789
--	--	--	--	--	--	--	--	--	--	--	--	--	--	-0.5899	-0.55278	-0.58989	-0.43955	-0.58989	-0.26246
--	--	--	--	--	--	--	--	--	--	--	--	--	--	-0.5999	-0.56859	-0.5999	-0.4541	-0.59989	-0.26599
