# Supplementary material for: Unveiling of free carrier transport and ion migration in a 2D–3D perovskite mixture for stable optoelectronic devices
Source: Royal Society of Chemistry journal article supplement (doi:10.1039/d5nr00992h), 2025-01-01
Supplement: d5nr00992h4.xlsx [file d5nr00992h4.xlsx]

## Sheet: GIWAXS
												3D		2D-3D passivation		2D-3D segregation
												0.03294	293.969	0.03294	288.762	0.02294	275.338
												0.03883	168.289	0.03883	165.644	0.02883	157.474
												0.04472	102.306	0.04472	100.377	0.03472	95.3747
												0.05061	44.1507	0.05061	42.6453	0.04061	40.3083
												0.0565	11.2326	0.0565	10.0193	0.0465	9.41555
												0.06239	2.12848	0.06239	1.01585	0.05239	0.89155
												0.06828	1.17911	0.06828	0.11946	0.05828	0.04809
												0.07417	0.80555	0.07417	0.027	0.06417	0.00177
												0.08006	0.16842	0.08006	0.00691	0.07006	0.000771308
												0.08595	0.03278	0.08595	0.00412	0.07595	0.000659632
												0.09184	0.01264	0.09184	0.003	0.08184	0.0005874
												0.09773	0.00698	0.09773	0.00233	0.08773	0.000532042
												0.10362	0.00468	0.10362	0.0019	0.09362	0.000489045
												0.10951	0.00346	0.10951	0.0016	0.09951	0.00045272
												0.1154	0.00272	0.1154	0.00138	0.1054	0.000430882
												0.12129	0.00224	0.12129	0.00123	0.11129	0.000415613
												0.12718	0.0019	0.12718	0.00111	0.11718	0.000407561
												0.13307	0.00165	0.13307	0.00102	0.12307	0.000400835
												0.13896	0.00147	0.13896	0.000968683	0.12896	0.000402196
												0.14485	0.00133	0.14485	0.000919095	0.13485	0.000403862
												0.15074	0.00122	0.15074	0.000882366	0.14074	0.000402636
												0.15663	0.00114	0.15663	0.000846233	0.14663	0.000401314
												0.16252	0.00106	0.16252	0.000806179	0.15252	0.00040181
												0.16841	0.001	0.16841	0.000764516	0.15841	0.000401312
												0.1743	0.000943105	0.1743	0.00074245	0.1643	0.000400313
												0.18019	0.000897257	0.18019	0.000725342	0.17019	0.000406722
												0.18608	0.000864732	0.18608	0.000715642	0.17608	0.000414583
												0.19197	0.000849927	0.19197	0.00070832	0.18197	0.00041847
												0.19786	0.000834279	0.19786	0.000703854	0.18786	0.000419347
												0.20375	0.000822909	0.20375	0.000699178	0.19375	0.000422947
												0.20964	0.000812072	0.20964	0.000685479	0.19964	0.000421199
												0.21553	0.000796716	0.21553	0.000672973	0.20553	0.000417071
												0.22142	0.000780293	0.22142	0.000661181	0.21142	0.000415743
												0.22731	0.000764977	0.22731	0.000648943	0.21731	0.000416365
												0.2332	0.000748124	0.2332	0.000636215	0.2232	0.000415903
												0.23909	0.000732692	0.23909	0.000630294	0.22909	0.00041795
												0.24498	0.00072436	0.24498	0.000621544	0.23498	0.000420877
												0.25087	0.000716393	0.25087	0.000617965	0.24087	0.000425247
												0.25676	0.00071173	0.25676	0.000619587	0.24676	0.000429707
												0.26265	0.000709071	0.26265	0.000615936	0.25265	0.000432506
												0.26854	0.000707991	0.26854	0.000614148	0.25854	0.000433182
												0.27443	0.000710329	0.27443	0.000620879	0.26443	0.000436509
												0.28032	0.000709737	0.28032	0.000620013	0.27032	0.000439754
												0.28621	0.000706861	0.28621	0.000618649	0.27621	0.000445001
												0.2921	0.000707285	0.2921	0.000620128	0.2821	0.000453284
												0.29799	0.000706339	0.29799	0.000616602	0.28799	0.000459643
												0.30388	0.000702125	0.30388	0.000611252	0.29388	0.000465807
												0.30977	0.0006988	0.30977	0.000611403	0.29977	0.000470817
												0.31566	0.000699622	0.31566	0.000610637	0.30566	0.00047529
												0.32155	0.000699878	0.32155	0.000611786	0.31155	0.000478073
												0.32744	0.000699314	0.32744	0.000613445	0.31744	0.000486782
												0.33333	0.000697358	0.33333	0.000613427	0.32333	0.000497833
												0.33922	0.000696119	0.33922	0.000619539	0.32922	0.000513682
												0.34511	0.000696103	0.34511	0.000619157	0.33511	0.000521029
												0.351	0.000696684	0.351	0.000617728	0.341	0.000534166
												0.35689	0.000698643	0.35689	0.000619884	0.34689	0.000541795
												0.36278	0.000701437	0.36278	0.000624416	0.35278	0.00054659
												0.36867	0.000709421	0.36867	0.000622696	0.35867	0.000556942
												0.37456	0.000713343	0.37456	0.00062389	0.36456	0.000579597
												0.38045	0.000716407	0.38045	0.00062533	0.37045	0.00060224
												0.38634	0.000717889	0.38634	0.000625101	0.37634	0.000628572
												0.39223	0.000719349	0.39223	0.000622908	0.38223	0.000657935
												0.39812	0.000718442	0.39812	0.000620735	0.38812	0.000685978
												0.40401	0.0007176	0.40401	0.000618966	0.39401	0.00071554
												0.4099	0.000718008	0.4099	0.000618115	0.3999	0.000749802
												0.41579	0.000720651	0.41579	0.000616409	0.40579	0.000801856
												0.42168	0.000721332	0.42168	0.000621272	0.41168	0.000868678
												0.42757	0.000722516	0.42757	0.000624671	0.41757	0.000960757
												0.43346	0.000724527	0.43346	0.000628081	0.42346	0.00108
												0.43935	0.000722808	0.43935	0.000629492	0.42935	0.00127
												0.44524	0.000721196	0.44524	0.000631674	0.43524	0.00156
												0.45113	0.000718277	0.45113	0.000631409	0.44113	0.00211
												0.45702	0.000718714	0.45702	0.000631331	0.44702	0.00312
												0.46291	0.000716617	0.46291	0.000632857	0.45291	0.0042
												0.4688	0.000720966	0.4688	0.000637829	0.4588	0.00495
												0.47469	0.000722794	0.47469	0.000644875	0.46469	0.00525
												0.48058	0.000727202	0.48058	0.0006463	0.47058	0.00504
												0.48647	0.00073247	0.48647	0.000646784	0.47647	0.00449
												0.49236	0.000739877	0.49236	0.000647409	0.48236	0.00407
												0.49825	0.000741937	0.49825	0.000645678	0.48825	0.00375
												0.50414	0.00074579	0.50414	0.000646541	0.49414	0.0032
												0.51003	0.00074756	0.51003	0.000651419	0.50003	0.00282
												0.51592	0.00074563	0.51592	0.000656939	0.50592	0.00221
												0.52181	0.000747261	0.52181	0.000660578	0.51181	0.00136
												0.5277	0.000749455	0.5277	0.000664541	0.5177	0.000653422
												0.53359	0.000746825	0.53359	0.000669285	0.52359	0.000507876
												0.53948	0.000747107	0.53948	0.000665963	0.52948	0.000422956
												0.54537	0.000748637	0.54537	0.000666156	0.53537	0.00040098
												0.55126	0.000745739	0.55126	0.000669631	0.54126	0.00039534
												0.55715	0.000745797	0.55715	0.000672019	0.54715	0.000393213
												0.56304	0.000747998	0.56304	0.000665564	0.55304	0.00039104
												0.56893	0.00074703	0.56893	0.000669655	0.55893	0.000393744
												0.57482	0.000750458	0.57482	0.000670818	0.56482	0.00039512
												0.58071	0.000754485	0.58071	0.0006695	0.57071	0.000391592
												0.58659	0.000753517	0.58659	0.000672405	0.57659	0.000386553
												0.59249	0.000756803	0.59249	0.000682187	0.58249	0.000385405
												0.59837	0.000762438	0.59837	0.000686475	0.58837	0.00038183
												0.60427	0.000759551	0.60427	0.000689968	0.59427	0.000379606
												0.61016	0.000758408	0.61016	0.000691935	0.60015	0.000378059
												0.61605	0.000754877	0.61605	0.000689391	0.60605	0.000378064
												0.62194	0.000752253	0.62194	0.000690029	0.61194	0.00037908
												0.62782	0.000750137	0.62782	0.000689141	0.61782	0.000382867
												0.63371	0.000746571	0.63371	0.000686551	0.62371	0.00038509
												0.6396	0.000744231	0.6396	0.000686195	0.6296	0.000389796
												0.64549	0.000745675	0.64549	0.000687165	0.63549	0.000393777
												0.65138	0.000740401	0.65138	0.000685866	0.64138	0.000394449
												0.65727	0.000732832	0.65727	0.000688039	0.64727	0.00039106
												0.66316	0.000730465	0.66316	0.00069072	0.65316	0.000395175
												0.66905	0.000729276	0.66905	0.000690639	0.65905	0.000394211
												0.67494	0.00072933	0.67494	0.000691663	0.66494	0.000395725
												0.68083	0.000732134	0.68083	0.00068968	0.67083	0.000397602
												0.68672	0.000736157	0.68672	0.000688204	0.67672	0.000401515
												0.69261	0.000736645	0.69261	0.000686058	0.68261	0.000399605
												0.6985	0.000731787	0.6985	0.000683013	0.6885	0.000401373
												0.70439	0.000727073	0.70439	0.000680703	0.69439	0.000399759
												0.71028	0.000727822	0.71028	0.000677277	0.70028	0.000400686
												0.71617	0.000722996	0.71617	0.00067472	0.70617	0.00040057
												0.72206	0.000721028	0.72206	0.00067395	0.71206	0.000401627
												0.72795	0.000718905	0.72795	0.000671628	0.71795	0.000400762
												0.73384	0.000722884	0.73384	0.000671143	0.72384	0.000403243
												0.73973	0.000718089	0.73973	0.000671462	0.72973	0.000401958
												0.74562	0.000722972	0.74562	0.00067356	0.73562	0.000403638
												0.75151	0.000729804	0.75151	0.000676682	0.74151	0.000407453
												0.7574	0.000740492	0.7574	0.000683627	0.7474	0.000410629
												0.76329	0.000748146	0.76329	0.00068668	0.75329	0.000413343
												0.76918	0.000754115	0.76918	0.000689373	0.75918	0.00041445
												0.77507	0.000760363	0.77507	0.00069158	0.76507	0.000416186
												0.78096	0.000763175	0.78096	0.000694552	0.77096	0.000416841
												0.78685	0.000768856	0.78685	0.000698467	0.77685	0.000420215
												0.79274	0.000769128	0.79274	0.000703585	0.78274	0.000424288
												0.79863	0.000778117	0.79863	0.000709892	0.78863	0.000429224
												0.80452	0.0007811	0.80452	0.00071535	0.79452	0.000435996
												0.81041	0.000790777	0.81041	0.000719131	0.80041	0.000440757
												0.8163	0.000791757	0.8163	0.000723463	0.8063	0.000444314
												0.82219	0.000795005	0.82219	0.00073053	0.81219	0.000445103
												0.82808	0.000800291	0.82808	0.000738138	0.81808	0.00044654
												0.83397	0.000807702	0.83397	0.000736764	0.82397	0.000442097
												0.83986	0.000811369	0.83986	0.000740071	0.82986	0.000444812
												0.84575	0.000830524	0.84575	0.000747257	0.83575	0.000447992
												0.85164	0.000850852	0.85164	0.00075172	0.84164	0.000453579
												0.85753	0.000866361	0.85753	0.000756837	0.84753	0.000461815
												0.86342	0.000886665	0.86342	0.000768119	0.85342	0.000476988
												0.86931	0.000907654	0.86931	0.000779888	0.85931	0.000486107
												0.8752	0.00092163	0.8752	0.000792658	0.8652	0.00049949
												0.88109	0.000936557	0.88109	0.000803319	0.87109	0.000509819
												0.88698	0.000952375	0.88698	0.000815097	0.87698	0.000528652
												0.89287	0.000968491	0.89287	0.000832827	0.88287	0.000554497
												0.89876	0.00098922	0.89876	0.000853748	0.88876	0.000583503
												0.90465	0.00101	0.90465	0.000864718	0.89465	0.00060768
												0.91054	0.00103	0.91054	0.000888929	0.90054	0.000634364
												0.91643	0.00105	0.91643	0.000910011	0.90643	0.000653172
												0.92232	0.00109	0.92232	0.000928629	0.91232	0.000654942
												0.92821	0.00112	0.92821	0.000946982	0.91821	0.00063828
												0.9341	0.00117	0.9341	0.000974505	0.9241	0.000618899
												0.93999	0.00122	0.93999	0.000995018	0.92999	0.000600776
												0.94588	0.00129	0.94588	0.00103	0.93588	0.000579644
												0.95177	0.00136	0.95177	0.00106	0.94177	0.000569764
												0.95766	0.00145	0.95766	0.0011	0.94766	0.000580997
												0.96355	0.00153	0.96355	0.00113	0.95355	0.000597191
												0.96944	0.00161	0.96944	0.00118	0.95944	0.000614297
												0.97533	0.00168	0.97533	0.00122	0.96533	0.000636364
												0.98122	0.00173	0.98122	0.00127	0.97122	0.000657251
												0.98711	0.00177	0.98711	0.00133	0.97711	0.000672075
												0.993	0.00178	0.993	0.00138	0.983	0.000684139
												0.99889	0.00178	0.99889	0.0014	0.98889	0.000688788
												1.00478	0.00178	1.00478	0.0014	0.99478	0.000686632
												1.01067	0.00177	1.01067	0.00139	1.00067	0.000680493
												1.01656	0.00173	1.01656	0.00136	1.00656	0.00067009
												1.02245	0.00171	1.02245	0.00133	1.01245	0.000660536
												1.02834	0.00166	1.02834	0.00131	1.01834	0.000653233
												1.03423	0.00161	1.03423	0.00129	1.02423	0.000645575
												1.04012	0.00156	1.04012	0.00127	1.03012	0.000635439
												1.04601	0.00151	1.04601	0.00125	1.03601	0.000627305
												1.0519	0.00143	1.0519	0.00124	1.0419	0.000618831
												1.05779	0.00134	1.05779	0.0012	1.04779	0.000607311
												1.06368	0.00126	1.06368	0.00115	1.05368	0.000596471
												1.06957	0.00114	1.06957	0.0011	1.05957	0.000584503
												1.07546	0.00103	1.07546	0.00104	1.06546	0.000571734
												1.08135	0.000931545	1.08135	0.000957411	1.07135	0.000561323
												1.08724	0.000864187	1.08724	0.000902883	1.07724	0.000556732
												1.09313	0.00080762	1.09313	0.000849479	1.08313	0.000552233
												1.09902	0.000784214	1.09902	0.000807297	1.08902	0.000555015
												1.10491	0.000782781	1.10491	0.000774811	1.09491	0.00056248
												1.1108	0.000791848	1.1108	0.000754036	1.1008	0.000563424
												1.11669	0.000802236	1.11669	0.000742379	1.10669	0.000555236
												1.12258	0.000810143	1.12258	0.000741831	1.11258	0.000552072
												1.12847	0.000821965	1.12847	0.000746026	1.11847	0.000544811
												1.13436	0.00082964	1.13436	0.000749015	1.12436	0.000537152
												1.14025	0.000830917	1.14025	0.000749203	1.13025	0.00053203
												1.14614	0.000831298	1.14614	0.000751642	1.13614	0.000533618
												1.15203	0.000829114	1.15203	0.00075421	1.14203	0.00053366
												1.15792	0.00083087	1.15792	0.000759711	1.14792	0.000535974
												1.1638	0.000836409	1.1638	0.000766182	1.1538	0.00053584
												1.16969	0.000842616	1.16969	0.000778443	1.15969	0.00054035
												1.17558	0.000848771	1.17558	0.000789813	1.16558	0.000544961
												1.18147	0.000858661	1.18147	0.000793926	1.17147	0.000550073
												1.18736	0.000862317	1.18736	0.000793439	1.17736	0.000550995
												1.19325	0.00086479	1.19325	0.000793033	1.18325	0.000552159
												1.19914	0.000864919	1.19914	0.000789099	1.18914	0.000552009
												1.20503	0.000869203	1.20503	0.000789244	1.19503	0.000556133
												1.21092	0.000874338	1.21092	0.000796847	1.20092	0.000559176
												1.21681	0.000882686	1.21681	0.000803496	1.20681	0.000566576
												1.2227	0.000889764	1.2227	0.000812333	1.2127	0.000573281
												1.22859	0.000898374	1.22859	0.000821759	1.21859	0.000578602
												1.23448	0.00090044	1.23448	0.000826679	1.22448	0.000583044
												1.24037	0.000904412	1.24037	0.000829289	1.23037	0.000588279
												1.24626	0.00091158	1.24626	0.000838855	1.23626	0.000592201
												1.25215	0.00091621	1.25215	0.000846045	1.24215	0.000596516
												1.25804	0.000923585	1.25804	0.000852089	1.24804	0.000601008
												1.26393	0.000931971	1.26393	0.000856719	1.25393	0.000610529
												1.26982	0.000937845	1.26982	0.000862109	1.25982	0.000616249
												1.27571	0.000932051	1.27571	0.000860769	1.26571	0.000618582
												1.2816	0.000940494	1.2816	0.000861524	1.2716	0.000630733
												1.28749	0.000947963	1.28749	0.000866514	1.27749	0.000645596
												1.29338	0.000958279	1.29338	0.000880431	1.28338	0.000657083
												1.29927	0.000966351	1.29927	0.000887488	1.28927	0.000673212
												1.30516	0.000987153	1.30516	0.000895467	1.29516	0.000691853
												1.31105	0.000993058	1.31105	0.000903133	1.30105	0.000706879
												1.31694	0.001	1.31694	0.000915359	1.30694	0.00073179
												1.32283	0.00101	1.32283	0.000919767	1.31283	0.000760184
												1.32872	0.00103	1.32872	0.000928099	1.31872	0.000790319
												1.33461	0.00104	1.33461	0.000943642	1.32461	0.000823558
												1.3405	0.00105	1.3405	0.000949967	1.3305	0.000852226
												1.34639	0.00106	1.34639	0.000953608	1.33639	0.00086948
												1.35228	0.00108	1.35228	0.000961956	1.34228	0.000866662
												1.35817	0.00109	1.35817	0.00097624	1.34817	0.000861215
												1.36406	0.0011	1.36406	0.000984635	1.35406	0.000849694
												1.36995	0.00111	1.36995	0.001	1.35995	0.000836018
												1.37584	0.00111	1.37584	0.00101	1.36584	0.000821571
												1.38173	0.00112	1.38173	0.00101	1.37173	0.000822774
												1.38762	0.00112	1.38762	0.00102	1.37762	0.000816184
												1.39351	0.00113	1.39351	0.00102	1.38351	0.000813587
												1.3994	0.00114	1.3994	0.00103	1.3894	0.000813464
												1.40529	0.00115	1.40529	0.00105	1.39529	0.000821291
												1.41118	0.00115	1.41118	0.00105	1.40118	0.000829401
												1.41707	0.00116	1.41707	0.00107	1.40707	0.000850197
												1.42296	0.00116	1.42296	0.00108	1.41296	0.000874894
												1.42885	0.00116	1.42885	0.00108	1.41885	0.00089626
												1.43474	0.00117	1.43474	0.00109	1.42474	0.000907538
												1.44063	0.00117	1.44063	0.00109	1.43063	0.000904254
												1.44652	0.00119	1.44652	0.00109	1.43652	0.000882988
												1.45241	0.00119	1.45241	0.00109	1.44241	0.000850845
												1.4583	0.0012	1.4583	0.0011	1.4483	0.000822682
												1.46419	0.0012	1.46419	0.0011	1.45419	0.000790885
												1.47008	0.00121	1.47008	0.00111	1.46008	0.000773452
												1.47597	0.00121	1.47597	0.00112	1.46597	0.000769615
												1.48186	0.00121	1.48186	0.00112	1.47186	0.00077332
												1.48775	0.00121	1.48775	0.00112	1.47775	0.000774788
												1.49364	0.00122	1.49364	0.00113	1.48364	0.000785795
												1.49953	0.00122	1.49953	0.00113	1.48953	0.000789614
												1.50542	0.00122	1.50542	0.00113	1.49542	0.000792454
												1.51131	0.00122	1.51131	0.00113	1.50131	0.000796225
												1.5172	0.00123	1.5172	0.00114	1.5072	0.000802331
												1.52309	0.00124	1.52309	0.00114	1.51309	0.000808962
												1.52898	0.00125	1.52898	0.00115	1.51898	0.000816539
												1.53487	0.00127	1.53487	0.00115	1.52487	0.00082045
												1.54076	0.00129	1.54076	0.00116	1.53076	0.000823419
												1.54665	0.0013	1.54665	0.00117	1.53665	0.000826351
												1.55254	0.00131	1.55254	0.00118	1.54254	0.000825864
												1.55843	0.00132	1.55843	0.00118	1.54843	0.000827427
												1.56432	0.00134	1.56432	0.0012	1.55432	0.000838491
												1.57021	0.00135	1.57021	0.00121	1.56021	0.000845443
												1.5761	0.00136	1.5761	0.00121	1.5661	0.000852699
												1.58199	0.00138	1.58199	0.00122	1.57199	0.000857385
												1.58788	0.00139	1.58788	0.00125	1.57788	0.000868176
												1.59377	0.0014	1.59377	0.00126	1.58377	0.000875238
												1.59966	0.00141	1.59966	0.00127	1.58966	0.000882006
												1.60555	0.00142	1.60555	0.00128	1.59555	0.00088482
												1.61144	0.00143	1.61144	0.00129	1.60144	0.000894095
												1.61733	0.00144	1.61733	0.00129	1.60733	0.000898335
												1.62322	0.00146	1.62322	0.0013	1.61322	0.000896534
												1.62911	0.00147	1.62911	0.00132	1.61911	0.000901379
												1.635	0.00149	1.635	0.00134	1.625	0.000913448
												1.64089	0.0015	1.64089	0.00135	1.63089	0.000915651
												1.64678	0.00151	1.64678	0.00135	1.63678	0.000922939
												1.65267	0.00152	1.65267	0.00137	1.64267	0.000934785
												1.65856	0.00154	1.65856	0.00138	1.64856	0.000945102
												1.66445	0.00154	1.66445	0.00139	1.65445	0.000945193
												1.67034	0.00155	1.67034	0.0014	1.66034	0.000958519
												1.67623	0.00156	1.67623	0.00141	1.66623	0.000970094
												1.68212	0.00156	1.68212	0.00141	1.67212	0.000974559
												1.68801	0.00155	1.68801	0.00142	1.67801	0.000980563
												1.6939	0.00155	1.6939	0.00143	1.6839	0.000992922
												1.69979	0.00154	1.69979	0.00143	1.68979	0.001
												1.70568	0.00154	1.70568	0.00143	1.69568	0.00101
												1.71157	0.00155	1.71157	0.00144	1.70157	0.00103
												1.71746	0.00155	1.71746	0.00144	1.70746	0.00105
												1.72335	0.00155	1.72335	0.00144	1.71335	0.00106
												1.72923	0.00156	1.72923	0.00144	1.71923	0.00109
												1.73512	0.00154	1.73512	0.00145	1.72512	0.00111
												1.74101	0.00154	1.74101	0.00145	1.73101	0.00115
												1.7469	0.00154	1.7469	0.00145	1.7369	0.00119
												1.75279	0.00154	1.75279	0.00145	1.74279	0.00123
												1.75868	0.00154	1.75868	0.00145	1.74868	0.00125
												1.76457	0.00155	1.76457	0.00144	1.75457	0.00127
												1.77046	0.00154	1.77046	0.00144	1.76046	0.00128
												1.77635	0.00154	1.77635	0.00143	1.76635	0.00127
												1.78224	0.00154	1.78224	0.00143	1.77224	0.00126
												1.78813	0.00154	1.78813	0.00143	1.77813	0.00125
												1.79402	0.00155	1.79402	0.00144	1.78402	0.00123
												1.79991	0.00155	1.79991	0.00144	1.78991	0.00121
												1.8058	0.00154	1.8058	0.00144	1.7958	0.0012
												1.81169	0.00155	1.81169	0.00144	1.80169	0.00119
												1.81758	0.00154	1.81758	0.00143	1.80758	0.00118
												1.82347	0.00155	1.82347	0.00142	1.81347	0.00117
												1.82936	0.00156	1.82936	0.00142	1.81936	0.00117
												1.83525	0.00158	1.83525	0.00142	1.82525	0.00116
												1.84114	0.00159	1.84114	0.00143	1.83114	0.00117
												1.84703	0.00163	1.84703	0.00144	1.83703	0.00118
												1.85292	0.00165	1.85292	0.00145	1.84292	0.00121
												1.85881	0.00169	1.85881	0.00147	1.84881	0.00124
												1.8647	0.00173	1.8647	0.00148	1.8547	0.00127
												1.87059	0.00178	1.87059	0.0015	1.86059	0.00128
												1.87648	0.00184	1.87648	0.00152	1.86648	0.00129
												1.88237	0.00188	1.88237	0.00155	1.87237	0.00128
												1.88826	0.00193	1.88826	0.00158	1.87826	0.00126
												1.89415	0.00197	1.89415	0.00162	1.88415	0.00122
												1.90004	0.00201	1.90004	0.00167	1.89004	0.00118
												1.90593	0.00203	1.90593	0.00173	1.89593	0.00112
												1.91182	0.00206	1.91182	0.00178	1.90182	0.00109
												1.91771	0.0021	1.91771	0.00183	1.90771	0.00106
												1.9236	0.00212	1.9236	0.00186	1.9136	0.00105
												1.92949	0.00212	1.92949	0.00188	1.91949	0.00105
												1.93538	0.00214	1.93538	0.00189	1.92538	0.00105
												1.94127	0.00214	1.94127	0.0019	1.93127	0.00104
												1.94716	0.00214	1.94716	0.0019	1.93716	0.00103
												1.95305	0.00215	1.95305	0.00189	1.94305	0.00101
												1.95894	0.00217	1.95894	0.0019	1.94894	0.000987745
												1.96483	0.00218	1.96483	0.00189	1.95483	0.000971984
												1.97072	0.00219	1.97072	0.0019	1.96072	0.000959542
												1.97661	0.0022	1.97661	0.00192	1.96661	0.000954349
												1.9825	0.0022	1.9825	0.00196	1.9725	0.000948787
												1.98839	0.00221	1.98839	0.00198	1.97839	0.000955705
												1.99428	0.00224	1.99428	0.00202	1.98428	0.00096528
												2.00017	0.00226	2.00017	0.00206	1.99017	0.000989784
												2.00606	0.0023	2.00606	0.00208	1.99606	0.00101
												2.01195	0.00231	2.01195	0.00211	2.00195	0.00106

## Sheet: I-V Curves, 2D-3D passivation
	300K		290K		280K		270K		260K		250K		240K		230K		220K		210K
-0.59991	-1.46532	-0.59991	-1.36404	-0.59992	-1.18837	-0.59992	-1.0339	-0.59992	-0.87973	-0.5999	-0.72817	-0.5999	-0.67327	-0.5999	-0.57343	-0.5999	-0.44987	-0.59991	-0.39039
-0.5499	-1.23562	-0.5499	-1.14933	-0.54991	-1.00723	-0.54991	-0.87709	-0.54991	-0.75318	-0.54989	-0.64319	-0.54989	-0.57927	-0.5899	-0.55831	-0.5899	-0.43549	-0.58989	-0.39195
-0.49991	-1.03621	-0.49991	-0.95981	-0.49992	-0.84875	-0.49991	-0.73893	-0.49992	-0.63715	-0.4999	-0.5443	-0.4999	-0.49478	-0.57989	-0.5431	-0.57989	-0.42506	-0.57989	-0.38315
-0.44993	-0.85848	-0.44994	-0.79248	-0.44994	-0.70642	-0.44994	-0.61668	-0.44993	-0.53248	-0.44992	-0.46409	-0.44992	-0.41546	-0.56989	-0.52854	-0.56989	-0.41495	-0.5699	-0.36364
-0.39993	-0.70019	-0.39994	-0.64512	-0.39994	-0.5806	-0.39994	-0.50541	-0.39994	-0.43951	-0.39992	-0.38169	-0.39992	-0.34709	-0.55989	-0.51242	-0.55989	-0.40127	-0.55988	-0.34971
-0.34992	-0.55726	-0.34993	-0.51439	-0.34993	-0.46592	-0.34993	-0.40654	-0.34993	-0.35785	-0.34992	-0.31192	-0.34991	-0.28533	-0.54989	-0.49668	-0.54989	-0.39156	-0.54989	-0.32931
-0.29992	-0.43177	-0.29993	-0.39956	-0.29993	-0.36676	-0.29993	-0.31981	-0.29993	-0.28505	-0.29992	-0.24899	-0.29992	-0.22911	-0.53988	-0.48295	-0.53989	-0.3796	-0.53989	-0.30439
-0.24989	-0.3245	-0.2499	-0.29964	-0.2499	-0.27806	-0.24989	-0.24378	-0.2499	-0.22054	-0.24988	-0.19323	-0.24988	-0.17905	-0.52989	-0.46563	-0.52989	-0.37082	-0.52988	-0.30132
-0.1999	-0.23289	-0.19991	-0.21474	-0.19991	-0.20324	-0.19991	-0.17787	-0.19991	-0.16335	-0.1999	-0.14469	-0.1999	-0.13459	-0.51989	-0.4517	-0.51989	-0.35987	-0.5199	-0.2936
-0.14993	-0.15663	-0.14993	-0.14397	-0.14993	-0.13901	-0.14993	-0.12141	-0.14993	-0.11423	-0.14993	-0.10196	-0.14993	-0.09502	-0.50989	-0.4377	-0.50989	-0.34818	-0.50989	-0.29599
-0.09993	-0.09391	-0.09993	-0.08619	-0.09994	-0.08475	-0.09993	-0.07457	-0.09993	-0.07128	-0.09992	-0.06418	-0.09992	-0.06048	-0.49989	-0.42346	-0.49989	-0.33954	-0.4999	-0.27653
-0.04993	-0.04343	-0.04993	-0.03974	-0.04993	-0.03966	-0.04993	-0.03505	-0.04993	-0.03405	-0.04992	-0.03077	-0.04992	-0.02945	-0.4899	-0.41002	-0.4899	-0.32972	-0.48988	-0.28909
9.09319e-05	0.00116	8.62138e-05	0.00116	8.70169e-05	0.000998207	9.08315e-05	0.000871826	9.45458e-05	0.000727454	0.00010478	0.000624742	9.65487e-05	0.000122759	-0.4799	-0.3954	-0.4799	-0.31893	-0.4799	-0.28052
0.0501	0.04407	0.0501	0.04105	0.05009	0.04047	0.0501	0.03578	0.05009	0.0342	0.0501	0.03109	0.0501	0.02968	-0.46991	-0.38442	-0.46991	-0.31048	-0.46991	-0.2453
0.10011	0.09367	0.1001	0.0869	0.1001	0.08514	0.1001	0.07575	0.1001	0.07251	0.1001	0.06589	0.1001	0.06241	-0.45991	-0.36976	-0.45991	-0.30055	-0.45991	-0.23098
0.1501	0.15062	0.15011	0.14205	0.15011	0.13782	0.1501	0.12252	0.1501	0.11608	0.15011	0.10546	0.15011	0.09954	-0.44992	-0.35709	-0.44992	-0.29166	-0.44991	-0.22467
0.20011	0.22153	0.2001	0.20875	0.2001	0.19885	0.2001	0.17746	0.2001	0.16536	0.20011	0.15008	0.20012	0.1419	-0.43992	-0.34412	-0.43992	-0.28095	-0.43992	-0.21596
0.25009	0.30483	0.25009	0.28799	0.25008	0.26986	0.25008	0.24248	0.25008	0.22307	0.25009	0.20237	0.25009	0.18852	-0.42992	-0.33206	-0.42992	-0.27134	-0.42992	-0.20837
0.30009	0.40172	0.30009	0.38203	0.30008	0.35221	0.30009	0.31735	0.30008	0.28883	0.30009	0.26182	0.30009	0.24286	-0.41992	-0.32023	-0.41992	-0.2623	-0.41992	-0.20137
0.35009	0.51399	0.35008	0.49049	0.35008	0.44643	0.35008	0.40422	0.35008	0.36255	0.35008	0.32726	0.35008	0.30429	-0.40992	-0.30887	-0.40992	-0.25353	-0.40992	-0.19588
0.40012	0.6383	0.40012	0.61306	0.40012	0.5515	0.40012	0.50064	0.40012	0.44411	0.40012	0.40282	0.40012	0.37208	-0.39992	-0.29696	-0.39992	-0.24668	-0.39992	-0.20407
0.45012	0.77741	0.45012	0.74829	0.45011	0.66832	0.45012	0.6074	0.45011	0.53414	0.45012	0.48453	0.45012	0.4469	-0.38992	-0.28748	-0.38992	-0.23782	-0.38992	-0.20755
0.50009	0.92556	0.50009	0.89511	0.50009	0.79289	0.50009	0.72429	0.50009	0.63416	0.50009	0.57372	0.50009	0.52971	-0.37992	-0.2769	-0.37992	-0.22958	-0.37991	-0.20108
0.55009	1.08378	0.55009	1.05337	0.55008	0.92724	0.55008	0.85114	0.55008	0.74021	0.55008	0.67187	0.55008	0.61924	-0.36992	-0.26584	-0.36992	-0.22104	-0.36991	-0.19668
0.60013	1.2511	0.60013	1.22016	0.60013	1.07001	0.60013	0.98659	0.60012	0.85517	0.60012	0.77776	0.60012	0.71664	-0.35991	-0.25589	-0.35991	-0.21276	-0.35991	-0.18574
0.65013	1.42433	0.65013	1.39417	0.65012	1.21963	0.65012	1.12958	0.65012	0.9819	0.65012	0.88979	0.65012	0.82061	-0.34991	-0.24484	-0.34991	-0.20455	-0.34991	-0.17343
0.70012	1.58372	0.70012	1.55802	0.70013	1.38103	0.70013	1.28474	0.70012	1.11169	0.70012	1.01122	0.70012	0.93526	-0.33991	-0.23468	-0.33991	-0.19658	-0.3399	-0.16973
0.75009	1.76993	0.75009	1.74856	0.75009	1.53214	0.75009	1.43003	0.7501	1.25179	0.7501	1.14237	0.7501	1.05388	-0.32992	-0.22535	-0.32992	-0.18881	-0.32992	-0.15854
0.80011	1.96115	0.80011	1.94725	0.80011	1.70843	0.80011	1.6013	0.80012	1.39777	0.80012	1.28437	0.80012	1.18409	-0.31992	-0.21618	-0.31992	-0.18126	-0.31992	-0.15392
0.85011	2.16812	0.85011	2.15211	0.85011	1.89107	0.85011	1.77873	0.85011	1.54067	0.85012	1.42748	0.85012	1.32298	-0.30992	-0.20719	-0.30992	-0.17494	-0.30992	-0.1456
0.90011	2.37465	0.90011	2.36303	0.90011	2.08298	0.90011	1.96661	0.90011	1.70555	0.9001	1.5738	0.9001	1.4672	-0.29991	-0.19883	-0.29991	-0.1676	-0.29991	-0.14345
0.95011	2.59171	0.95011	2.57947	0.95011	2.28298	0.95011	2.16024	0.95011	1.87827	0.95011	1.73222	0.95011	1.62658	-0.28991	-0.18906	-0.28991	-0.16095	-0.28991	-0.13535
1.00015	2.81382	1.00015	2.8057	1.00015	2.48757	1.00015	2.36064	1.00015	2.06185	1.00014	1.90439	1.00014	1.79465	-0.27991	-0.18078	-0.27991	-0.15409	-0.27991	-0.13009
1.05013	3.0561	1.05013	3.03558	1.05013	2.69785	1.05013	2.57115	1.05013	2.25342	1.05012	2.08709	1.05012	1.97842	-0.26991	-0.17233	-0.26991	-0.14709	-0.26991	-0.1292
1.10012	3.28434	1.10013	3.29154	1.10012	2.92227	1.10012	2.78625	1.10012	2.45386	1.10012	2.27985	1.10012	2.16652	-0.25991	-0.16412	-0.25991	-0.14008	-0.25991	-0.12163
1.15016	3.54267	1.15016	3.53703	1.15016	3.14825	1.15016	3.0223	1.15016	2.67461	1.15016	2.4772	1.15016	2.3633	-0.24988	-0.15595	-0.24988	-0.1336	-0.24988	-0.11649
1.20016	3.81044	1.20016	3.80056	1.20016	3.38308	1.20016	3.24714	1.20016	2.89581	1.20015	2.69053	1.20015	2.57694	-0.23988	-0.14832	-0.23989	-0.12712	-0.23988	-0.11201
1.25015	4.07753	1.25016	4.08102	1.25016	3.63833	1.25016	3.48773	1.25016	3.11701	1.25015	2.91223	1.25015	2.80159	-0.22989	-0.14016	-0.22989	-0.12053	-0.2299	-0.10527
1.30013	4.35511	1.30013	4.36712	1.30013	3.90669	1.30013	3.74543	1.30013	3.36061	1.30012	3.12763	1.30012	3.03716	-0.21989	-0.13274	-0.21989	-0.11499	-0.21989	-0.09947
1.30013	4.33189	1.30013	4.31995	1.30013	3.86653	1.30013	3.71732	1.30013	3.34056	1.30012	3.07666	1.30012	3.01351	-0.20989	-0.12525	-0.2099	-0.10867	-0.20991	-0.09431
1.25015	3.99241	1.25016	3.99059	1.25016	3.54585	1.25016	3.39888	1.25016	3.05418	1.25015	2.7909	1.25015	2.72705	-0.1999	-0.11806	-0.1999	-0.10266	-0.1999	-0.09061
1.20016	3.67832	1.20016	3.67014	1.20016	3.25987	1.20016	3.11806	1.20016	2.7795	1.20015	2.57701	1.20015	2.48006	-0.18992	-0.1109	-0.18992	-0.09657	-0.18991	-0.08525
1.15016	3.39141	1.15016	3.36734	1.15016	2.99251	1.15016	2.84441	1.15016	2.53446	1.15016	2.34151	1.15015	2.24931	-0.17992	-0.10428	-0.17992	-0.09108	-0.17991	-0.08015
1.10012	3.12022	1.10012	3.08789	1.10012	2.73669	1.10012	2.59457	1.10012	2.30837	1.10012	2.12556	1.10012	2.03659	-0.16992	-0.09734	-0.16992	-0.08535	-0.16992	-0.07686
1.05013	2.86283	1.05013	2.82938	1.05013	2.5057	1.05013	2.35629	1.05013	2.10015	1.05012	1.92682	1.05012	1.83967	-0.15992	-0.09096	-0.15992	-0.07971	-0.15992	-0.07202
1.00015	2.61485	1.00015	2.57524	1.00015	2.27912	1.00015	2.14167	1.00015	1.89723	1.00014	1.74463	1.00014	1.66146	-0.14993	-0.08462	-0.14992	-0.07436	-0.14992	-0.06734
0.95011	2.38001	0.95011	2.34394	0.95011	2.07285	0.95011	1.93864	0.95011	1.71838	0.95011	1.57682	0.95011	1.49135	-0.13993	-0.07827	-0.13993	-0.06888	-0.13993	-0.06297
0.90011	2.15687	0.90011	2.12409	0.90011	1.87405	0.90011	1.75138	0.90011	1.54532	0.9001	1.41713	0.9001	1.33754	-0.12992	-0.07196	-0.12993	-0.0638	-0.12993	-0.05676
0.85011	1.95365	0.85011	1.91346	0.85011	1.69407	0.85011	1.57599	0.85011	1.38963	0.85011	1.2687	0.85011	1.19042	-0.11992	-0.06594	-0.11992	-0.05849	-0.11992	-0.05217
0.80011	1.75922	0.80011	1.72039	0.80011	1.5202	0.80011	1.40697	0.80011	1.24031	0.80011	1.12597	0.80012	1.0618	-0.10992	-0.0599	-0.10992	-0.05334	-0.10992	-0.0479
0.75009	1.57652	0.75009	1.53767	0.75009	1.35729	0.7501	1.25161	0.7501	1.09946	0.7501	0.98283	0.7501	0.93962	-0.09992	-0.05407	-0.09992	-0.04832	-0.09992	-0.04241
0.70012	1.40488	0.70012	1.36838	0.70011	1.20235	0.70013	1.10809	0.70012	0.96993	0.70012	0.89325	0.70012	0.82593	-0.08992	-0.04834	-0.08992	-0.04342	-0.08992	-0.03873
0.65012	1.24093	0.65011	1.20435	0.65012	1.05997	0.65012	0.97152	0.65012	0.85258	0.65012	0.77698	0.65012	0.72033	-0.07991	-0.04307	-0.07991	-0.03838	-0.07991	-0.03479
0.60013	1.09138	0.60013	1.05344	0.60012	0.92291	0.60013	0.84773	0.60012	0.7413	0.60012	0.67517	0.60012	0.62382	-0.06991	-0.03754	-0.06991	-0.0336	-0.06991	-0.03028
0.55008	0.94555	0.55008	0.91072	0.55008	0.79992	0.55008	0.7324	0.55008	0.63909	0.55008	0.58354	0.55008	0.53627	-0.05992	-0.03202	-0.05992	-0.02885	-0.05992	-0.02639
0.50009	0.81074	0.50009	0.78074	0.50009	0.68562	0.50009	0.62386	0.50009	0.54487	0.50009	0.49772	0.50009	0.45713	-0.04992	-0.02677	-0.04992	-0.02401	-0.04992	-0.02215
0.45012	0.68584	0.45012	0.65727	0.45011	0.57937	0.45011	0.52492	0.45011	0.45787	0.45011	0.41833	0.45012	0.38471	-0.03992	-0.02139	-0.03992	-0.01929	-0.03992	-0.0179
0.40012	0.56987	0.40012	0.54424	0.40012	0.48131	0.40012	0.43415	0.40012	0.38008	0.40012	0.34827	0.40012	0.31849	-0.02991	-0.01612	-0.02991	-0.01455	-0.02991	-0.01345
0.35009	0.4636	0.35008	0.43993	0.35008	0.39097	0.35008	0.35253	0.35008	0.3088	0.35008	0.2834	0.35008	0.26001	-0.01992	-0.01084	-0.01992	-0.0098	-0.01992	-0.00907
0.30009	0.36717	0.30009	0.34783	0.30008	0.31028	0.30008	0.27836	0.30008	0.24548	0.30009	0.22628	0.30009	0.20728	-0.00991	-0.00559	-0.00991	-0.00511	-0.00991	-0.00467
0.25009	0.28211	0.25009	0.26608	0.25008	0.23802	0.25008	0.21296	0.25008	0.18966	0.25009	0.17511	0.25009	0.16042	7.54682e-05	-0.000566737	7.62713e-05	-0.000573696	8.00859e-05	-0.000490317
0.20011	0.20727	0.2001	0.19422	0.2001	0.17531	0.2001	0.15675	0.2001	0.14042	0.20011	0.12947	0.20011	0.11932	0.0101	0.00496	0.0101	0.00438	0.0101	0.00405
0.1501	0.14234	0.15009	0.13331	0.15009	0.12118	0.1501	0.10813	0.1501	0.09782	0.15011	0.09063	0.15011	0.08333	0.02011	0.01031	0.02011	0.00921	0.02011	0.00853
0.1001	0.08779	0.1001	0.08195	0.1001	0.07507	0.1001	0.06663	0.10009	0.06082	0.1001	0.05637	0.1001	0.05202	0.0301	0.01575	0.03011	0.01412	0.03011	0.01306
0.0501	0.04139	0.0501	0.03851	0.05009	0.03539	0.05009	0.03123	0.05009	0.02869	0.0501	0.02646	0.0501	0.02432	0.0401	0.02127	0.0401	0.0191	0.0401	0.01748
7.38665e-05	-0.000668557	6.96504e-05	-0.000629429	6.90481e-05	-0.000568486	6.53338e-05	-0.000637223	6.98511e-05	-0.000568063	7.91824e-05	-0.000555705	7.80782e-05	-0.000637429	0.0501	0.02689	0.0501	0.0252	0.0501	0.02194
-0.04993	-0.04328	-0.04993	-0.04013	-0.04993	-0.03703	-0.04993	-0.03265	-0.04993	-0.02985	-0.04992	-0.0276	-0.04992	-0.02511	0.0601	0.03261	0.0601	0.03071	0.0601	0.02664
-0.09993	-0.09293	-0.09993	-0.08628	-0.09993	-0.07913	-0.09993	-0.06954	-0.09993	-0.06261	-0.09992	-0.05709	-0.09992	-0.05157	0.0701	0.03842	0.0701	0.03616	0.07009	0.03146
-0.14993	-0.15443	-0.14994	-0.14366	-0.14994	-0.12953	-0.14994	-0.11356	-0.14994	-0.10095	-0.14993	-0.09095	-0.14992	-0.0823	0.0801	0.04441	0.0801	0.04174	0.0801	0.03617
-0.1999	-0.22932	-0.19991	-0.21506	-0.19991	-0.19181	-0.19991	-0.16832	-0.19991	-0.14735	-0.19991	-0.13074	-0.1999	-0.11706	0.0901	0.05064	0.0901	0.04741	0.0901	0.04104
-0.24989	-0.32113	-0.2499	-0.30212	-0.2499	-0.26568	-0.2499	-0.23366	-0.2499	-0.20099	-0.24988	-0.17972	-0.24988	-0.15854	0.1001	0.05694	0.1001	0.05324	0.1001	0.04684
-0.29992	-0.43104	-0.29993	-0.40694	-0.29993	-0.35315	-0.29993	-0.30989	-0.29993	-0.26373	-0.29992	-0.23481	-0.29991	-0.20402	0.11011	0.06299	0.11011	0.05928	0.11011	0.05167
-0.34993	-0.55933	-0.34993	-0.52937	-0.34993	-0.4529	-0.34993	-0.39826	-0.34993	-0.33626	-0.34992	-0.29722	-0.34991	-0.25718	0.12011	0.0697	0.12011	0.06531	0.12011	0.05782
-0.39993	-0.71212	-0.39994	-0.67437	-0.39994	-0.57057	-0.39994	-0.50097	-0.39994	-0.41905	-0.39992	-0.36935	-0.39992	-0.31854	0.13011	0.07655	0.13011	0.07159	0.13011	0.06321
-0.44993	-0.88631	-0.44994	-0.83903	-0.44994	-0.7047	-0.44994	-0.6182	-0.44994	-0.51318	-0.44992	-0.45137	-0.44992	-0.38562	0.14011	0.08342	0.14011	0.07811	0.14011	0.06847
-0.49991	-1.08357	-0.49992	-1.02796	-0.49992	-0.85554	-0.49992	-0.75123	-0.49992	-0.61753	-0.4999	-0.54251	-0.49989	-0.4619	0.15011	0.0906	0.15011	0.08459	0.15011	0.07486
-0.5499	-1.30594	-0.54991	-1.24246	-0.54991	-1.0261	-0.54991	-0.90125	-0.54991	-0.73825	-0.54989	-0.64747	-0.54989	-0.54933	0.16011	0.09766	0.16011	0.09141	0.1601	0.08083
-0.59991	-1.5519	-0.59991	-1.47389	-0.59993	-1.22197	-0.59992	-1.0701	-0.59992	-0.87376	-0.5999	-0.76506	-0.5999	-0.6506	0.17011	0.10488	0.17011	0.0982	0.17011	0.08525
--	--	--	--	--	--	--	--	--	--	--	--	--	--	0.1801	0.1128	0.1801	0.10512	0.1801	0.09094
--	--	--	--	--	--	--	--	--	--	--	--	--	--	0.1901	0.12046	0.1901	0.11242	0.1901	0.09753
--	--	--	--	--	--	--	--	--	--	--	--	--	--	0.20012	0.12873	0.20012	0.11965	0.20012	0.09139
--	--	--	--	--	--	--	--	--	--	--	--	--	--	0.21012	0.13684	0.21012	0.12703	0.21011	0.09466
--	--	--	--	--	--	--	--	--	--	--	--	--	--	0.2201	0.14486	0.22012	0.13502	0.22011	0.10175
--	--	--	--	--	--	--	--	--	--	--	--	--	--	0.2301	0.15344	0.23011	0.14298	0.23011	0.10769
--	--	--	--	--	--	--	--	--	--	--	--	--	--	0.2401	0.16214	0.2401	0.15029	0.24011	0.11321
--	--	--	--	--	--	--	--	--	--	--	--	--	--	0.25009	0.171	0.25009	0.15602	0.2501	0.11908
--	--	--	--	--	--	--	--	--	--	--	--	--	--	0.26009	0.18028	0.26009	0.16247	0.2601	0.12536
--	--	--	--	--	--	--	--	--	--	--	--	--	--	0.27009	0.18962	0.27009	0.16448	0.27009	0.13625
--	--	--	--	--	--	--	--	--	--	--	--	--	--	0.28009	0.20015	0.28009	0.17205	0.28009	0.13979
--	--	--	--	--	--	--	--	--	--	--	--	--	--	0.29009	0.20935	0.29009	0.19328	0.29009	0.14528
--	--	--	--	--	--	--	--	--	--	--	--	--	--	0.30009	0.21983	0.30009	0.18938	0.30009	0.15134
--	--	--	--	--	--	--	--	--	--	--	--	--	--	0.31009	0.23013	0.31009	0.21347	0.31009	0.18383
--	--	--	--	--	--	--	--	--	--	--	--	--	--	0.32009	0.24095	0.32009	0.22305	0.32009	0.19417
--	--	--	--	--	--	--	--	--	--	--	--	--	--	0.33009	0.25155	0.33009	0.23282	0.33009	0.20393
--	--	--	--	--	--	--	--	--	--	--	--	--	--	0.34008	0.26233	0.34008	0.24274	0.34008	0.21351
--	--	--	--	--	--	--	--	--	--	--	--	--	--	0.35008	0.27372	0.35008	0.25312	0.35008	0.22232
--	--	--	--	--	--	--	--	--	--	--	--	--	--	0.36009	0.28451	0.36008	0.26341	0.36008	0.19284
--	--	--	--	--	--	--	--	--	--	--	--	--	--	0.37009	0.29638	0.37009	0.27394	0.37009	0.1977
--	--	--	--	--	--	--	--	--	--	--	--	--	--	0.38009	0.30925	0.38009	0.26458	0.38009	0.2051
--	--	--	--	--	--	--	--	--	--	--	--	--	--	0.39012	0.32081	0.39012	0.27189	0.39012	0.20871
--	--	--	--	--	--	--	--	--	--	--	--	--	--	0.40012	0.33331	0.40012	0.28176	0.40012	0.21337
--	--	--	--	--	--	--	--	--	--	--	--	--	--	0.41013	0.34623	0.41012	0.29152	0.41012	0.22228
--	--	--	--	--	--	--	--	--	--	--	--	--	--	0.42012	0.35885	0.42012	0.30284	0.42012	0.28521
--	--	--	--	--	--	--	--	--	--	--	--	--	--	0.43012	0.37248	0.43012	0.31235	0.43012	0.29579
--	--	--	--	--	--	--	--	--	--	--	--	--	--	0.44012	0.38625	0.44012	0.32503	0.44012	0.29882
--	--	--	--	--	--	--	--	--	--	--	--	--	--	0.45012	0.40007	0.45011	0.33568	0.45011	0.27741
--	--	--	--	--	--	--	--	--	--	--	--	--	--	0.46011	0.41532	0.46011	0.34799	0.46011	0.31357
--	--	--	--	--	--	--	--	--	--	--	--	--	--	0.47011	0.4291	0.47011	0.3604	0.4701	0.3265
--	--	--	--	--	--	--	--	--	--	--	--	--	--	0.4801	0.44257	0.4801	0.37196	0.4801	0.34413
--	--	--	--	--	--	--	--	--	--	--	--	--	--	0.49009	0.45695	0.49009	0.38432	0.49009	0.35178
--	--	--	--	--	--	--	--	--	--	--	--	--	--	0.50009	0.47335	0.50009	0.39622	0.50009	0.34797
--	--	--	--	--	--	--	--	--	--	--	--	--	--	0.51009	0.48896	0.51009	0.40853	0.51009	0.36641
--	--	--	--	--	--	--	--	--	--	--	--	--	--	0.52009	0.50359	0.52008	0.41931	0.52008	0.37937
--	--	--	--	--	--	--	--	--	--	--	--	--	--	0.53008	0.51988	0.53008	0.43337	0.53008	0.39773
--	--	--	--	--	--	--	--	--	--	--	--	--	--	0.54008	0.53681	0.54008	0.44483	0.54007	0.41125
--	--	--	--	--	--	--	--	--	--	--	--	--	--	0.55008	0.55346	0.55008	0.45892	0.55008	0.42574
--	--	--	--	--	--	--	--	--	--	--	--	--	--	0.56008	0.57124	0.56008	0.47326	0.56009	0.44145
--	--	--	--	--	--	--	--	--	--	--	--	--	--	0.57008	0.58751	0.57008	0.4867	0.57008	0.43501
--	--	--	--	--	--	--	--	--	--	--	--	--	--	0.58012	0.60518	0.58012	0.50297	0.58012	0.44984
--	--	--	--	--	--	--	--	--	--	--	--	--	--	0.59012	0.62308	0.59012	0.51546	0.59012	0.45942
--	--	--	--	--	--	--	--	--	--	--	--	--	--	0.60012	0.64335	0.60012	0.52946	0.60012	0.46087
--	--	--	--	--	--	--	--	--	--	--	--	--	--	0.61011	0.66106	0.61011	0.53966	0.61011	0.48059
--	--	--	--	--	--	--	--	--	--	--	--	--	--	0.62011	0.67903	0.62011	0.5536	0.62011	0.49317
--	--	--	--	--	--	--	--	--	--	--	--	--	--	0.63012	0.69787	0.63011	0.56996	0.63011	0.50678
--	--	--	--	--	--	--	--	--	--	--	--	--	--	0.64012	0.71653	0.64012	0.58222	0.64012	0.53979
--	--	--	--	--	--	--	--	--	--	--	--	--	--	0.65012	0.73528	0.65012	0.59619	0.65012	0.55565
--	--	--	--	--	--	--	--	--	--	--	--	--	--	0.66012	0.75606	0.66012	0.61217	0.66011	0.56943
--	--	--	--	--	--	--	--	--	--	--	--	--	--	0.67012	0.77805	0.67012	0.62566	0.67012	0.59091
--	--	--	--	--	--	--	--	--	--	--	--	--	--	0.68013	0.79884	0.68012	0.64486	0.68012	0.60384
--	--	--	--	--	--	--	--	--	--	--	--	--	--	0.69013	0.81853	0.69012	0.66002	0.69012	0.59427
--	--	--	--	--	--	--	--	--	--	--	--	--	--	0.70012	0.83829	0.70012	0.67328	0.70012	0.60476
--	--	--	--	--	--	--	--	--	--	--	--	--	--	0.71012	0.86087	0.71012	0.688	0.71011	0.61779
--	--	--	--	--	--	--	--	--	--	--	--	--	--	0.72012	0.88257	0.72012	0.70664	0.72012	0.63474
--	--	--	--	--	--	--	--	--	--	--	--	--	--	0.73012	0.9044	0.73011	0.71927	0.73011	0.64019
--	--	--	--	--	--	--	--	--	--	--	--	--	--	0.74011	0.92672	0.74011	0.74073	0.74011	0.66421
--	--	--	--	--	--	--	--	--	--	--	--	--	--	0.7501	0.95006	0.7501	0.75595	0.7501	0.70775
--	--	--	--	--	--	--	--	--	--	--	--	--	--	0.7601	0.97313	0.76009	0.76978	0.7601	0.71568
--	--	--	--	--	--	--	--	--	--	--	--	--	--	0.77013	0.99635	0.77012	0.79189	0.77012	0.72989
--	--	--	--	--	--	--	--	--	--	--	--	--	--	0.78012	1.02015	0.78012	0.80612	0.78012	0.76188
--	--	--	--	--	--	--	--	--	--	--	--	--	--	0.79012	1.04356	0.79012	0.82263	0.79012	0.78771
--	--	--	--	--	--	--	--	--	--	--	--	--	--	0.80012	1.07	0.80012	0.8444	0.80013	0.78986
--	--	--	--	--	--	--	--	--	--	--	--	--	--	0.81012	1.09307	0.81011	0.8581	0.81011	0.81031
--	--	--	--	--	--	--	--	--	--	--	--	--	--	0.82012	1.1167	0.82011	0.88411	0.82011	0.82733
--	--	--	--	--	--	--	--	--	--	--	--	--	--	0.83012	1.14183	0.83012	0.89815	0.83011	0.80594
--	--	--	--	--	--	--	--	--	--	--	--	--	--	0.84012	1.1674	0.84011	0.91253	0.84012	0.86083
--	--	--	--	--	--	--	--	--	--	--	--	--	--	0.85012	1.19377	0.85012	0.93216	0.85012	0.86841
--	--	--	--	--	--	--	--	--	--	--	--	--	--	0.86012	1.22108	0.86012	0.94887	0.86011	0.85978
--	--	--	--	--	--	--	--	--	--	--	--	--	--	0.87012	1.24698	0.87012	0.96597	0.87012	0.88214
--	--	--	--	--	--	--	--	--	--	--	--	--	--	0.88012	1.27319	0.88012	0.9728	0.88012	0.90235
--	--	--	--	--	--	--	--	--	--	--	--	--	--	0.89011	1.30203	0.89011	0.99431	0.89011	0.91267
--	--	--	--	--	--	--	--	--	--	--	--	--	--	0.90011	1.32804	0.90011	1.01318	0.90011	0.96956
--	--	--	--	--	--	--	--	--	--	--	--	--	--	0.91012	1.3552	0.91011	1.03567	0.91011	0.97856
--	--	--	--	--	--	--	--	--	--	--	--	--	--	0.92012	1.39019	0.92011	1.06323	0.92011	0.97181
--	--	--	--	--	--	--	--	--	--	--	--	--	--	0.93012	1.41847	0.93012	1.08912	0.93012	0.99649
--	--	--	--	--	--	--	--	--	--	--	--	--	--	0.94011	1.44234	0.94012	1.10844	0.94012	1.01241
--	--	--	--	--	--	--	--	--	--	--	--	--	--	0.95011	1.46726	0.95012	1.13019	0.95011	1.039
--	--	--	--	--	--	--	--	--	--	--	--	--	--	0.96015	1.49874	0.96016	1.14877	0.96016	1.06965
--	--	--	--	--	--	--	--	--	--	--	--	--	--	0.97014	1.52778	0.97016	1.16686	0.97016	1.12141
--	--	--	--	--	--	--	--	--	--	--	--	--	--	0.98014	1.55793	0.98015	1.19606	0.98015	1.13854
--	--	--	--	--	--	--	--	--	--	--	--	--	--	0.99014	1.5864	0.99016	1.21495	0.99017	1.16268
--	--	--	--	--	--	--	--	--	--	--	--	--	--	1.00014	1.61726	1.00015	1.23783	1.00015	1.18779
--	--	--	--	--	--	--	--	--	--	--	--	--	--	1.01014	1.64838	1.01015	1.27923	1.01016	1.16759
--	--	--	--	--	--	--	--	--	--	--	--	--	--	1.02013	1.68339	1.02014	1.29757	1.02014	1.20808
--	--	--	--	--	--	--	--	--	--	--	--	--	--	1.03013	1.71489	1.03013	1.32377	1.03013	1.22489
--	--	--	--	--	--	--	--	--	--	--	--	--	--	1.04012	1.75059	1.04014	1.34973	1.04012	1.19551
--	--	--	--	--	--	--	--	--	--	--	--	--	--	1.05012	1.78183	1.05013	1.36462	1.05015	1.25249
--	--	--	--	--	--	--	--	--	--	--	--	--	--	1.06012	1.81481	1.06013	1.38847	1.06014	1.23229
--	--	--	--	--	--	--	--	--	--	--	--	--	--	1.07012	1.84772	1.07013	1.40484	1.07013	1.28456
--	--	--	--	--	--	--	--	--	--	--	--	--	--	1.08012	1.88372	1.08012	1.43256	1.08013	1.30751
--	--	--	--	--	--	--	--	--	--	--	--	--	--	1.09012	1.91803	1.09011	1.44293	1.09013	1.36868
--	--	--	--	--	--	--	--	--	--	--	--	--	--	1.10012	1.95044	1.10012	1.47536	1.10012	1.40323
--	--	--	--	--	--	--	--	--	--	--	--	--	--	1.11012	1.98521	1.11012	1.48664	1.11013	1.4367
--	--	--	--	--	--	--	--	--	--	--	--	--	--	1.12012	2.0214	1.12012	1.5148	1.12011	1.45993
--	--	--	--	--	--	--	--	--	--	--	--	--	--	1.13012	2.05249	1.13012	1.54183	1.13012	1.47007
--	--	--	--	--	--	--	--	--	--	--	--	--	--	1.14012	2.08996	1.14012	1.53832	1.14012	1.12831
--	--	--	--	--	--	--	--	--	--	--	--	--	--	1.15015	2.12357	1.15015	1.58697	1.15016	1.13106
--	--	--	--	--	--	--	--	--	--	--	--	--	--	1.16014	2.16526	1.16014	1.60655	1.16014	1.21579
--	--	--	--	--	--	--	--	--	--	--	--	--	--	1.17015	2.19656	1.17015	1.62356	1.17014	1.3628
--	--	--	--	--	--	--	--	--	--	--	--	--	--	1.18015	2.2366	1.18015	1.64907	1.18015	1.70627
--	--	--	--	--	--	--	--	--	--	--	--	--	--	1.19015	2.27495	1.19015	1.66857	1.19015	1.7378
--	--	--	--	--	--	--	--	--	--	--	--	--	--	1.20015	2.31122	1.20015	1.70868	1.20015	1.77139
--	--	--	--	--	--	--	--	--	--	--	--	--	--	1.21015	2.35321	1.21015	1.74336	1.21015	1.80538
--	--	--	--	--	--	--	--	--	--	--	--	--	--	1.22015	2.39128	1.22015	1.77022	1.22015	1.85182
--	--	--	--	--	--	--	--	--	--	--	--	--	--	1.23015	2.43239	1.23015	1.79431	1.23015	1.8539
--	--	--	--	--	--	--	--	--	--	--	--	--	--	1.24015	2.47253	1.24015	1.82927	1.24015	1.27352
--	--	--	--	--	--	--	--	--	--	--	--	--	--	1.25015	2.51289	1.25015	1.85088	1.25014	1.32448
--	--	--	--	--	--	--	--	--	--	--	--	--	--	1.26014	2.55373	1.26014	1.88178	1.26015	1.39132
--	--	--	--	--	--	--	--	--	--	--	--	--	--	1.27014	2.60397	1.27014	1.90443	1.27014	1.20802
--	--	--	--	--	--	--	--	--	--	--	--	--	--	1.28014	2.6398	1.28013	1.9491	1.28013	1.19301
--	--	--	--	--	--	--	--	--	--	--	--	--	--	1.29013	2.67825	1.29013	1.98095	1.29013	1.19618
--	--	--	--	--	--	--	--	--	--	--	--	--	--	1.30012	2.72645	1.30012	1.98939	1.30011	1.22284
--	--	--	--	--	--	--	--	--	--	--	--	--	--	1.30012	2.71138	1.30012	1.99449	1.30012	1.31877
--	--	--	--	--	--	--	--	--	--	--	--	--	--	1.29013	2.66385	1.29013	1.94707	1.29013	1.27682
--	--	--	--	--	--	--	--	--	--	--	--	--	--	1.28014	2.61122	1.28013	1.91132	1.28013	1.30782
--	--	--	--	--	--	--	--	--	--	--	--	--	--	1.27014	2.5679	1.27014	1.88537	1.27014	1.35095
--	--	--	--	--	--	--	--	--	--	--	--	--	--	1.26014	2.51518	1.26014	1.83563	1.26014	1.31385
--	--	--	--	--	--	--	--	--	--	--	--	--	--	1.25015	2.46958	1.25015	1.82042	1.25015	1.35976
--	--	--	--	--	--	--	--	--	--	--	--	--	--	1.24015	2.42482	1.24015	1.79916	1.24015	1.35144
--	--	--	--	--	--	--	--	--	--	--	--	--	--	1.23015	2.38003	1.23015	1.76512	1.23016	1.31517
--	--	--	--	--	--	--	--	--	--	--	--	--	--	1.22015	2.33102	1.22015	1.73365	1.22015	1.23815
--	--	--	--	--	--	--	--	--	--	--	--	--	--	1.21015	2.28886	1.21015	1.71306	1.21015	1.27336
--	--	--	--	--	--	--	--	--	--	--	--	--	--	1.20015	2.24151	1.20015	1.68523	1.20013	1.16361
--	--	--	--	--	--	--	--	--	--	--	--	--	--	1.19015	2.19775	1.19015	1.66315	1.19015	1.80384
--	--	--	--	--	--	--	--	--	--	--	--	--	--	1.18015	2.15215	1.18015	1.6335	1.18015	1.7843
--	--	--	--	--	--	--	--	--	--	--	--	--	--	1.17015	2.11366	1.17015	1.60341	1.17014	1.73619
--	--	--	--	--	--	--	--	--	--	--	--	--	--	1.16015	2.07222	1.16015	1.5877	1.16015	1.71279
--	--	--	--	--	--	--	--	--	--	--	--	--	--	1.15015	2.03446	1.15015	1.55417	1.15015	1.60878
--	--	--	--	--	--	--	--	--	--	--	--	--	--	1.14012	1.99276	1.14012	1.53457	1.14012	0.83224
--	--	--	--	--	--	--	--	--	--	--	--	--	--	1.13012	1.95445	1.13012	1.50763	1.13013	0.79898
--	--	--	--	--	--	--	--	--	--	--	--	--	--	1.12012	1.91627	1.12012	1.47423	1.12013	0.76388
--	--	--	--	--	--	--	--	--	--	--	--	--	--	1.11012	1.87672	1.11012	1.45902	1.11012	0.79972
--	--	--	--	--	--	--	--	--	--	--	--	--	--	1.10012	1.83919	1.10012	1.42874	1.10012	0.77602
--	--	--	--	--	--	--	--	--	--	--	--	--	--	1.09012	1.80136	1.09012	1.40517	1.09013	0.73741
--	--	--	--	--	--	--	--	--	--	--	--	--	--	1.08011	1.76225	1.08011	1.3852	1.08011	0.73072
--	--	--	--	--	--	--	--	--	--	--	--	--	--	1.07012	1.72743	1.07012	1.34865	1.07013	0.73185
--	--	--	--	--	--	--	--	--	--	--	--	--	--	1.06012	1.6935	1.06012	1.32839	1.06013	0.70338
--	--	--	--	--	--	--	--	--	--	--	--	--	--	1.05012	1.66011	1.05012	1.29672	1.05012	0.72524
--	--	--	--	--	--	--	--	--	--	--	--	--	--	1.04012	1.62737	1.04012	1.27621	1.04013	0.72344
--	--	--	--	--	--	--	--	--	--	--	--	--	--	1.03013	1.59661	1.03013	1.25354	1.03014	0.7085
--	--	--	--	--	--	--	--	--	--	--	--	--	--	1.02012	1.56173	1.02013	1.21628	1.02013	0.70125
--	--	--	--	--	--	--	--	--	--	--	--	--	--	1.01014	1.53124	1.01014	1.20611	1.01014	0.70378
--	--	--	--	--	--	--	--	--	--	--	--	--	--	1.00014	1.50142	1.00014	1.17791	1.00015	0.68894
--	--	--	--	--	--	--	--	--	--	--	--	--	--	0.99014	1.46827	0.99014	1.15008	0.99015	0.68686
--	--	--	--	--	--	--	--	--	--	--	--	--	--	0.98014	1.43554	0.98014	1.1332	0.98015	0.68228
--	--	--	--	--	--	--	--	--	--	--	--	--	--	0.97014	1.4065	0.97015	1.10929	0.97015	0.67439
--	--	--	--	--	--	--	--	--	--	--	--	--	--	0.96015	1.37718	0.96015	1.0986	0.96015	0.66108
--	--	--	--	--	--	--	--	--	--	--	--	--	--	0.95011	1.34702	0.95012	1.07299	0.95011	0.65481
--	--	--	--	--	--	--	--	--	--	--	--	--	--	0.94011	1.32002	0.94012	1.05167	0.94011	0.633
--	--	--	--	--	--	--	--	--	--	--	--	--	--	0.93011	1.292	0.93011	1.03288	0.93011	0.59917
--	--	--	--	--	--	--	--	--	--	--	--	--	--	0.92011	1.26395	0.92011	1.00749	0.92011	0.59683
--	--	--	--	--	--	--	--	--	--	--	--	--	--	0.9101	1.23413	0.91011	0.98623	0.91011	0.58399
--	--	--	--	--	--	--	--	--	--	--	--	--	--	0.9001	1.20547	0.90011	0.96974	0.90011	0.57142
--	--	--	--	--	--	--	--	--	--	--	--	--	--	0.8901	1.18159	0.89011	0.94824	0.89011	0.55985
--	--	--	--	--	--	--	--	--	--	--	--	--	--	0.88011	1.15446	0.88012	0.9273	0.88012	0.55543
--	--	--	--	--	--	--	--	--	--	--	--	--	--	0.87011	1.12977	0.87012	0.90679	0.87011	0.54874
--	--	--	--	--	--	--	--	--	--	--	--	--	--	0.86012	1.10348	0.86012	0.88892	0.86011	0.54537
--	--	--	--	--	--	--	--	--	--	--	--	--	--	0.85012	1.07981	0.85011	0.87372	0.85012	0.5269
--	--	--	--	--	--	--	--	--	--	--	--	--	--	0.84012	1.05339	0.84012	0.8524	0.84011	0.517
--	--	--	--	--	--	--	--	--	--	--	--	--	--	0.83012	1.03171	0.83011	0.83957	0.8301	0.49772
--	--	--	--	--	--	--	--	--	--	--	--	--	--	0.82012	1.00762	0.82011	0.82107	0.82011	0.47306
--	--	--	--	--	--	--	--	--	--	--	--	--	--	0.81012	0.98235	0.81011	0.80341	0.81011	0.45947
--	--	--	--	--	--	--	--	--	--	--	--	--	--	0.80012	0.95865	0.80011	0.78865	0.80011	0.4628
--	--	--	--	--	--	--	--	--	--	--	--	--	--	0.79012	0.93555	0.79012	0.76806	0.79012	0.44766
--	--	--	--	--	--	--	--	--	--	--	--	--	--	0.78012	0.91373	0.78012	0.75058	0.78012	0.44372
--	--	--	--	--	--	--	--	--	--	--	--	--	--	0.77013	0.89108	0.77012	0.73427	0.77012	0.44073
--	--	--	--	--	--	--	--	--	--	--	--	--	--	0.76009	0.86814	0.76009	0.71417	0.76009	0.43796
--	--	--	--	--	--	--	--	--	--	--	--	--	--	0.7501	0.84845	0.7501	0.70102	0.7501	0.42683
--	--	--	--	--	--	--	--	--	--	--	--	--	--	0.74011	0.82644	0.74011	0.68647	0.7401	0.42004
--	--	--	--	--	--	--	--	--	--	--	--	--	--	0.73012	0.80504	0.73011	0.66896	0.73011	0.40917
--	--	--	--	--	--	--	--	--	--	--	--	--	--	0.72012	0.78471	0.72011	0.65599	0.72011	0.38994
--	--	--	--	--	--	--	--	--	--	--	--	--	--	0.71012	0.76431	0.71012	0.64118	0.71011	0.38468
--	--	--	--	--	--	--	--	--	--	--	--	--	--	0.70012	0.74516	0.70012	0.62343	0.70011	0.37957
--	--	--	--	--	--	--	--	--	--	--	--	--	--	0.69012	0.72772	0.69012	0.61018	0.69013	0.37206
--	--	--	--	--	--	--	--	--	--	--	--	--	--	0.68013	0.70618	0.68012	0.59348	0.68011	0.35508
--	--	--	--	--	--	--	--	--	--	--	--	--	--	0.67012	0.68689	0.67012	0.58161	0.67012	0.35096
--	--	--	--	--	--	--	--	--	--	--	--	--	--	0.66012	0.67001	0.66012	0.56737	0.66012	0.34843
--	--	--	--	--	--	--	--	--	--	--	--	--	--	0.65012	0.65197	0.65012	0.55165	0.65011	0.34746
--	--	--	--	--	--	--	--	--	--	--	--	--	--	0.64012	0.63334	0.64011	0.5372	0.64011	0.34359
--	--	--	--	--	--	--	--	--	--	--	--	--	--	0.63012	0.61538	0.63011	0.52426	0.63011	0.33304
--	--	--	--	--	--	--	--	--	--	--	--	--	--	0.62011	0.59666	0.62011	0.50999	0.62011	0.32895
--	--	--	--	--	--	--	--	--	--	--	--	--	--	0.61011	0.58111	0.61011	0.49746	0.61011	0.31229
--	--	--	--	--	--	--	--	--	--	--	--	--	--	0.60012	0.56249	0.60012	0.48284	0.60012	0.29991
--	--	--	--	--	--	--	--	--	--	--	--	--	--	0.59012	0.54653	0.59012	0.47011	0.59011	0.30159
--	--	--	--	--	--	--	--	--	--	--	--	--	--	0.58012	0.53002	0.58012	0.45795	0.58012	0.29343
--	--	--	--	--	--	--	--	--	--	--	--	--	--	0.57008	0.51406	0.57008	0.44434	0.57008	0.27751
--	--	--	--	--	--	--	--	--	--	--	--	--	--	0.56008	0.49902	0.56008	0.43258	0.56008	0.27335
--	--	--	--	--	--	--	--	--	--	--	--	--	--	0.55008	0.48455	0.55008	0.41946	0.55008	0.27248
--	--	--	--	--	--	--	--	--	--	--	--	--	--	0.54008	0.46924	0.54008	0.40689	0.54008	0.2651
--	--	--	--	--	--	--	--	--	--	--	--	--	--	0.53008	0.45449	0.53008	0.39607	0.53008	0.25855
--	--	--	--	--	--	--	--	--	--	--	--	--	--	0.52008	0.44035	0.52009	0.38319	0.52008	0.25148
--	--	--	--	--	--	--	--	--	--	--	--	--	--	0.51009	0.42593	0.51009	0.37138	0.51009	0.24672
--	--	--	--	--	--	--	--	--	--	--	--	--	--	0.50009	0.41276	0.50009	0.35968	0.50008	0.24206
--	--	--	--	--	--	--	--	--	--	--	--	--	--	0.49009	0.39963	0.49009	0.34765	0.49009	0.23255
--	--	--	--	--	--	--	--	--	--	--	--	--	--	0.4801	0.38667	0.4801	0.33688	0.4801	0.21616
--	--	--	--	--	--	--	--	--	--	--	--	--	--	0.47011	0.37381	0.4701	0.32661	0.47011	0.21277
--	--	--	--	--	--	--	--	--	--	--	--	--	--	0.46011	0.36092	0.46011	0.31525	0.46011	0.20844
--	--	--	--	--	--	--	--	--	--	--	--	--	--	0.45011	0.3482	0.45011	0.306	0.45011	0.20395
--	--	--	--	--	--	--	--	--	--	--	--	--	--	0.44012	0.33649	0.44012	0.29557	0.44012	0.20915
--	--	--	--	--	--	--	--	--	--	--	--	--	--	0.43012	0.3243	0.43012	0.28451	0.43011	0.20034
--	--	--	--	--	--	--	--	--	--	--	--	--	--	0.42012	0.3128	0.42012	0.27548	0.42012	0.19637
--	--	--	--	--	--	--	--	--	--	--	--	--	--	0.41012	0.30093	0.41013	0.26523	0.41012	0.20299
--	--	--	--	--	--	--	--	--	--	--	--	--	--	0.40012	0.28903	0.40012	0.25571	0.40012	0.25232
--	--	--	--	--	--	--	--	--	--	--	--	--	--	0.39012	0.27807	0.39012	0.24702	0.39012	0.21248
--	--	--	--	--	--	--	--	--	--	--	--	--	--	0.38009	0.26758	0.38009	0.23724	0.38009	0.16172
--	--	--	--	--	--	--	--	--	--	--	--	--	--	0.37009	0.25622	0.37009	0.22804	0.37008	0.15707
--	--	--	--	--	--	--	--	--	--	--	--	--	--	0.36008	0.24554	0.36008	0.21959	0.36008	0.1514
--	--	--	--	--	--	--	--	--	--	--	--	--	--	0.35008	0.23556	0.35008	0.21021	0.35008	0.14698
--	--	--	--	--	--	--	--	--	--	--	--	--	--	0.34008	0.22507	0.34008	0.20199	0.34008	0.14662
--	--	--	--	--	--	--	--	--	--	--	--	--	--	0.33009	0.21592	0.33009	0.19351	0.33009	0.1396
--	--	--	--	--	--	--	--	--	--	--	--	--	--	0.32009	0.20608	0.32009	0.18564	0.32009	0.13481
--	--	--	--	--	--	--	--	--	--	--	--	--	--	0.31009	0.19732	0.31009	0.17789	0.31009	0.13187
--	--	--	--	--	--	--	--	--	--	--	--	--	--	0.30009	0.18824	0.30009	0.16961	0.30009	0.12507
--	--	--	--	--	--	--	--	--	--	--	--	--	--	0.29009	0.17966	0.29009	0.16239	0.29009	0.11989
--	--	--	--	--	--	--	--	--	--	--	--	--	--	0.28009	0.17116	0.28009	0.15473	0.28009	0.11571
--	--	--	--	--	--	--	--	--	--	--	--	--	--	0.27009	0.16269	0.27009	0.14752	0.2701	0.11091
--	--	--	--	--	--	--	--	--	--	--	--	--	--	0.26009	0.15483	0.26009	0.14083	0.26009	0.10388
--	--	--	--	--	--	--	--	--	--	--	--	--	--	0.25009	0.14662	0.25009	0.13316	0.25011	0.09828
--	--	--	--	--	--	--	--	--	--	--	--	--	--	0.2401	0.13867	0.2401	0.1264	0.2401	0.09238
--	--	--	--	--	--	--	--	--	--	--	--	--	--	0.2301	0.13125	0.2301	0.11985	0.23011	0.08695
--	--	--	--	--	--	--	--	--	--	--	--	--	--	0.2201	0.1236	0.2201	0.11301	0.22011	0.08274
--	--	--	--	--	--	--	--	--	--	--	--	--	--	0.2101	0.11618	0.21012	0.10671	0.21011	0.07875
--	--	--	--	--	--	--	--	--	--	--	--	--	--	0.20012	0.10954	0.20012	0.10012	0.20012	0.07403
--	--	--	--	--	--	--	--	--	--	--	--	--	--	0.1901	0.10272	0.1901	0.09409	0.19009	0.06995
--	--	--	--	--	--	--	--	--	--	--	--	--	--	0.1801	0.09612	0.1801	0.08792	0.1801	0.06678
--	--	--	--	--	--	--	--	--	--	--	--	--	--	0.17011	0.08962	0.17011	0.0826	0.1701	0.06214
--	--	--	--	--	--	--	--	--	--	--	--	--	--	0.1601	0.0832	0.16011	0.07688	0.1601	0.05731
--	--	--	--	--	--	--	--	--	--	--	--	--	--	0.15011	0.07703	0.15011	0.07103	0.15011	0.0537
--	--	--	--	--	--	--	--	--	--	--	--	--	--	0.14011	0.07095	0.14011	0.06564	0.14011	0.04981
--	--	--	--	--	--	--	--	--	--	--	--	--	--	0.13011	0.06521	0.13011	0.06034	0.13011	0.04641
--	--	--	--	--	--	--	--	--	--	--	--	--	--	0.12011	0.05939	0.12011	0.0549	0.12011	0.04285
--	--	--	--	--	--	--	--	--	--	--	--	--	--	0.11011	0.05391	0.11011	0.04992	0.1101	0.03908
--	--	--	--	--	--	--	--	--	--	--	--	--	--	0.1001	0.04844	0.1001	0.04498	0.1001	0.03509
--	--	--	--	--	--	--	--	--	--	--	--	--	--	0.0901	0.04311	0.0901	0.03987	0.0901	0.03176
--	--	--	--	--	--	--	--	--	--	--	--	--	--	0.0801	0.03783	0.0801	0.03512	0.0801	0.02798
--	--	--	--	--	--	--	--	--	--	--	--	--	--	0.0701	0.0327	0.0701	0.03041	0.0701	0.02432
--	--	--	--	--	--	--	--	--	--	--	--	--	--	0.0601	0.02772	0.0601	0.0258	0.0601	0.02039
--	--	--	--	--	--	--	--	--	--	--	--	--	--	0.0501	0.02287	0.0501	0.02128	0.0501	0.01663
--	--	--	--	--	--	--	--	--	--	--	--	--	--	0.0401	0.01797	0.0401	0.01682	0.0401	0.01344
--	--	--	--	--	--	--	--	--	--	--	--	--	--	0.0301	0.0133	0.0301	0.01242	0.03011	0.00986
--	--	--	--	--	--	--	--	--	--	--	--	--	--	0.02011	0.00868	0.02011	0.00805	0.0201	0.0064
--	--	--	--	--	--	--	--	--	--	--	--	--	--	0.0101	0.00412	0.0101	0.00378	0.0101	0.00298
--	--	--	--	--	--	--	--	--	--	--	--	--	--	8.07885e-05	-0.000507997	8.23947e-05	-0.00053256	8.31978e-05	-0.000456499
--	--	--	--	--	--	--	--	--	--	--	--	--	--	-0.00991	-0.00493	-0.00991	-0.00466	-0.00991	-0.00371
--	--	--	--	--	--	--	--	--	--	--	--	--	--	-0.01992	-0.00945	-0.01992	-0.00887	-0.01991	-0.007
--	--	--	--	--	--	--	--	--	--	--	--	--	--	-0.02992	-0.014	-0.02992	-0.01311	-0.02992	-0.01028
--	--	--	--	--	--	--	--	--	--	--	--	--	--	-0.03992	-0.01859	-0.03991	-0.01735	-0.03992	-0.01355
--	--	--	--	--	--	--	--	--	--	--	--	--	--	-0.04992	-0.02318	-0.04992	-0.02164	-0.04991	-0.017
--	--	--	--	--	--	--	--	--	--	--	--	--	--	-0.05992	-0.02788	-0.05992	-0.02595	-0.05992	-0.02044
--	--	--	--	--	--	--	--	--	--	--	--	--	--	-0.06991	-0.03269	-0.06991	-0.03029	-0.06991	-0.0239
--	--	--	--	--	--	--	--	--	--	--	--	--	--	-0.07991	-0.03749	-0.07991	-0.03466	-0.07991	-0.02719
--	--	--	--	--	--	--	--	--	--	--	--	--	--	-0.08991	-0.04265	-0.08991	-0.03897	-0.08991	-0.0305
--	--	--	--	--	--	--	--	--	--	--	--	--	--	-0.09992	-0.04767	-0.09992	-0.04343	-0.09992	-0.03373
--	--	--	--	--	--	--	--	--	--	--	--	--	--	-0.10992	-0.05293	-0.10992	-0.04807	-0.10992	-0.03746
--	--	--	--	--	--	--	--	--	--	--	--	--	--	-0.11992	-0.05832	-0.11992	-0.05286	-0.11992	-0.04043
--	--	--	--	--	--	--	--	--	--	--	--	--	--	-0.12992	-0.06366	-0.12992	-0.05765	-0.12992	-0.04396
--	--	--	--	--	--	--	--	--	--	--	--	--	--	-0.13993	-0.0692	-0.13993	-0.06233	-0.13992	-0.04735
--	--	--	--	--	--	--	--	--	--	--	--	--	--	-0.14992	-0.0751	-0.14992	-0.06745	-0.14992	-0.05082
--	--	--	--	--	--	--	--	--	--	--	--	--	--	-0.15992	-0.08087	-0.15992	-0.0726	-0.15992	-0.05424
--	--	--	--	--	--	--	--	--	--	--	--	--	--	-0.16992	-0.08704	-0.16992	-0.07797	-0.16992	-0.05807
--	--	--	--	--	--	--	--	--	--	--	--	--	--	-0.17992	-0.09318	-0.17992	-0.08293	-0.17991	-0.06169
--	--	--	--	--	--	--	--	--	--	--	--	--	--	-0.18991	-0.09979	-0.18991	-0.08837	-0.18991	-0.06534
--	--	--	--	--	--	--	--	--	--	--	--	--	--	-0.1999	-0.10656	-0.1999	-0.09403	-0.1999	-0.06883
--	--	--	--	--	--	--	--	--	--	--	--	--	--	-0.2099	-0.11312	-0.2099	-0.09975	-0.20989	-0.07308
--	--	--	--	--	--	--	--	--	--	--	--	--	--	-0.2199	-0.12022	-0.2199	-0.10516	-0.21989	-0.07647
--	--	--	--	--	--	--	--	--	--	--	--	--	--	-0.2299	-0.12767	-0.22989	-0.11146	-0.2299	-0.0797
--	--	--	--	--	--	--	--	--	--	--	--	--	--	-0.2399	-0.13496	-0.23989	-0.11741	-0.23989	-0.08402
--	--	--	--	--	--	--	--	--	--	--	--	--	--	-0.24989	-0.14212	-0.24989	-0.12351	-0.24988	-0.08815
--	--	--	--	--	--	--	--	--	--	--	--	--	--	-0.25991	-0.15056	-0.25992	-0.13015	-0.25992	-0.09162
--	--	--	--	--	--	--	--	--	--	--	--	--	--	-0.26991	-0.15862	-0.26992	-0.13626	-0.26992	-0.09748
--	--	--	--	--	--	--	--	--	--	--	--	--	--	-0.27991	-0.16596	-0.27992	-0.14288	-0.27992	-0.10219
--	--	--	--	--	--	--	--	--	--	--	--	--	--	-0.28991	-0.17511	-0.28991	-0.15032	-0.28992	-0.10688
--	--	--	--	--	--	--	--	--	--	--	--	--	--	-0.29991	-0.1836	-0.29991	-0.15689	-0.29992	-0.11151
--	--	--	--	--	--	--	--	--	--	--	--	--	--	-0.30992	-0.19179	-0.30992	-0.16453	-0.30992	-0.11644
--	--	--	--	--	--	--	--	--	--	--	--	--	--	-0.31992	-0.20115	-0.31992	-0.17131	-0.31993	-0.12022
--	--	--	--	--	--	--	--	--	--	--	--	--	--	-0.32992	-0.21009	-0.32992	-0.17863	-0.32993	-0.12396
--	--	--	--	--	--	--	--	--	--	--	--	--	--	-0.33991	-0.21942	-0.33991	-0.18656	-0.33991	-0.12748
--	--	--	--	--	--	--	--	--	--	--	--	--	--	-0.34991	-0.2293	-0.34991	-0.19428	-0.34992	-0.13264
--	--	--	--	--	--	--	--	--	--	--	--	--	--	-0.35991	-0.23926	-0.35991	-0.20188	-0.35992	-0.13804
--	--	--	--	--	--	--	--	--	--	--	--	--	--	-0.36991	-0.25038	-0.36991	-0.20994	-0.36993	-0.14287
--	--	--	--	--	--	--	--	--	--	--	--	--	--	-0.37992	-0.26114	-0.37992	-0.21768	-0.37992	-0.14743
--	--	--	--	--	--	--	--	--	--	--	--	--	--	-0.38992	-0.27088	-0.38992	-0.22603	-0.38992	-0.15278
--	--	--	--	--	--	--	--	--	--	--	--	--	--	-0.39992	-0.28214	-0.39992	-0.2346	-0.39992	-0.15757
--	--	--	--	--	--	--	--	--	--	--	--	--	--	-0.40992	-0.29306	-0.40992	-0.24267	-0.40992	-0.15944
--	--	--	--	--	--	--	--	--	--	--	--	--	--	-0.41992	-0.30521	-0.41992	-0.25144	-0.41992	-0.16591
--	--	--	--	--	--	--	--	--	--	--	--	--	--	-0.42992	-0.31708	-0.42992	-0.26118	-0.42991	-0.16942
--	--	--	--	--	--	--	--	--	--	--	--	--	--	-0.43992	-0.33049	-0.43992	-0.27096	-0.43991	-0.17382
--	--	--	--	--	--	--	--	--	--	--	--	--	--	-0.44992	-0.3433	-0.44991	-0.2801	-0.44991	-0.1775
--	--	--	--	--	--	--	--	--	--	--	--	--	--	-0.45991	-0.35464	-0.45991	-0.28955	-0.45991	-0.18568
--	--	--	--	--	--	--	--	--	--	--	--	--	--	-0.46991	-0.36738	-0.46991	-0.30039	-0.46991	-0.18934
--	--	--	--	--	--	--	--	--	--	--	--	--	--	-0.4799	-0.38133	-0.4799	-0.31054	-0.4799	-0.19896
--	--	--	--	--	--	--	--	--	--	--	--	--	--	-0.4899	-0.39627	-0.48989	-0.32095	-0.48989	-0.20411
--	--	--	--	--	--	--	--	--	--	--	--	--	--	-0.49989	-0.40995	-0.49989	-0.33142	-0.49989	-0.21103
--	--	--	--	--	--	--	--	--	--	--	--	--	--	-0.50989	-0.42337	-0.50989	-0.34268	-0.50989	-0.21679
--	--	--	--	--	--	--	--	--	--	--	--	--	--	-0.51989	-0.43801	-0.51989	-0.35484	-0.51989	-0.22446
--	--	--	--	--	--	--	--	--	--	--	--	--	--	-0.52989	-0.45245	-0.52989	-0.3661	-0.52989	-0.22074
--	--	--	--	--	--	--	--	--	--	--	--	--	--	-0.53988	-0.46775	-0.53988	-0.37752	-0.53988	-0.23034
--	--	--	--	--	--	--	--	--	--	--	--	--	--	-0.54989	-0.48511	-0.54988	-0.39058	-0.54988	-0.23671
--	--	--	--	--	--	--	--	--	--	--	--	--	--	-0.55989	-0.49908	-0.55989	-0.4021	-0.55989	-0.24292
--	--	--	--	--	--	--	--	--	--	--	--	--	--	-0.56989	-0.52061	-0.56989	-0.41406	-0.56989	-0.24987
--	--	--	--	--	--	--	--	--	--	--	--	--	--	-0.57989	-0.53394	-0.57989	-0.4276	-0.57989	-0.25789
--	--	--	--	--	--	--	--	--	--	--	--	--	--	-0.5899	-0.55278	-0.58989	-0.43955	-0.58989	-0.26246
--	--	--	--	--	--	--	--	--	--	--	--	--	--	-0.5999	-0.56859	-0.5999	-0.4541	-0.59989	-0.26599

## Sheet: I-V Curves, 2D-3D segregation
	300K		290K		280K		270K		260K		250K		240K		230K		220K		210K
-0.59991	-1.46532	-0.59991	-1.36404	-0.59992	-1.18837	-0.59992	-1.0339	-0.59992	-0.87973	-0.5999	-0.72817	-0.5999	-0.67327	-0.5999	-0.57343	-0.5999	-0.44987	-0.59991	-0.39039
-0.5499	-1.23562	-0.5499	-1.14933	-0.54991	-1.00723	-0.54991	-0.87709	-0.54991	-0.75318	-0.54989	-0.64319	-0.54989	-0.57927	-0.5899	-0.55831	-0.5899	-0.43549	-0.58989	-0.39195
-0.49991	-1.03621	-0.49991	-0.95981	-0.49992	-0.84875	-0.49991	-0.73893	-0.49992	-0.63715	-0.4999	-0.5443	-0.4999	-0.49478	-0.57989	-0.5431	-0.57989	-0.42506	-0.57989	-0.38315
-0.44993	-0.85848	-0.44994	-0.79248	-0.44994	-0.70642	-0.44994	-0.61668	-0.44993	-0.53248	-0.44992	-0.46409	-0.44992	-0.41546	-0.56989	-0.52854	-0.56989	-0.41495	-0.5699	-0.36364
-0.39993	-0.70019	-0.39994	-0.64512	-0.39994	-0.5806	-0.39994	-0.50541	-0.39994	-0.43951	-0.39992	-0.38169	-0.39992	-0.34709	-0.55989	-0.51242	-0.55989	-0.40127	-0.55988	-0.34971
-0.34992	-0.55726	-0.34993	-0.51439	-0.34993	-0.46592	-0.34993	-0.40654	-0.34993	-0.35785	-0.34992	-0.31192	-0.34991	-0.28533	-0.54989	-0.49668	-0.54989	-0.39156	-0.54989	-0.32931
-0.29992	-0.43177	-0.29993	-0.39956	-0.29993	-0.36676	-0.29993	-0.31981	-0.29993	-0.28505	-0.29992	-0.24899	-0.29992	-0.22911	-0.53988	-0.48295	-0.53989	-0.3796	-0.53989	-0.30439
-0.24989	-0.3245	-0.2499	-0.29964	-0.2499	-0.27806	-0.24989	-0.24378	-0.2499	-0.22054	-0.24988	-0.19323	-0.24988	-0.17905	-0.52989	-0.46563	-0.52989	-0.37082	-0.52988	-0.30132
-0.1999	-0.23289	-0.19991	-0.21474	-0.19991	-0.20324	-0.19991	-0.17787	-0.19991	-0.16335	-0.1999	-0.14469	-0.1999	-0.13459	-0.51989	-0.4517	-0.51989	-0.35987	-0.5199	-0.2936
-0.14993	-0.15663	-0.14993	-0.14397	-0.14993	-0.13901	-0.14993	-0.12141	-0.14993	-0.11423	-0.14993	-0.10196	-0.14993	-0.09502	-0.50989	-0.4377	-0.50989	-0.34818	-0.50989	-0.29599
-0.09993	-0.09391	-0.09993	-0.08619	-0.09994	-0.08475	-0.09993	-0.07457	-0.09993	-0.07128	-0.09992	-0.06418	-0.09992	-0.06048	-0.49989	-0.42346	-0.49989	-0.33954	-0.4999	-0.27653
-0.04993	-0.04343	-0.04993	-0.03974	-0.04993	-0.03966	-0.04993	-0.03505	-0.04993	-0.03405	-0.04992	-0.03077	-0.04992	-0.02945	-0.4899	-0.41002	-0.4899	-0.32972	-0.48988	-0.28909
9.09319e-05	0.00116	8.62138e-05	0.00116	8.70169e-05	0.000998207	9.08315e-05	0.000871826	9.45458e-05	0.000727454	0.00010478	0.000624742	9.65487e-05	0.000122759	-0.4799	-0.3954	-0.4799	-0.31893	-0.4799	-0.28052
0.0501	0.04407	0.0501	0.04105	0.05009	0.04047	0.0501	0.03578	0.05009	0.0342	0.0501	0.03109	0.0501	0.02968	-0.46991	-0.38442	-0.46991	-0.31048	-0.46991	-0.2453
0.10011	0.09367	0.1001	0.0869	0.1001	0.08514	0.1001	0.07575	0.1001	0.07251	0.1001	0.06589	0.1001	0.06241	-0.45991	-0.36976	-0.45991	-0.30055	-0.45991	-0.23098
0.1501	0.15062	0.15011	0.14205	0.15011	0.13782	0.1501	0.12252	0.1501	0.11608	0.15011	0.10546	0.15011	0.09954	-0.44992	-0.35709	-0.44992	-0.29166	-0.44991	-0.22467
0.20011	0.22153	0.2001	0.20875	0.2001	0.19885	0.2001	0.17746	0.2001	0.16536	0.20011	0.15008	0.20012	0.1419	-0.43992	-0.34412	-0.43992	-0.28095	-0.43992	-0.21596
0.25009	0.30483	0.25009	0.28799	0.25008	0.26986	0.25008	0.24248	0.25008	0.22307	0.25009	0.20237	0.25009	0.18852	-0.42992	-0.33206	-0.42992	-0.27134	-0.42992	-0.20837
0.30009	0.40172	0.30009	0.38203	0.30008	0.35221	0.30009	0.31735	0.30008	0.28883	0.30009	0.26182	0.30009	0.24286	-0.41992	-0.32023	-0.41992	-0.2623	-0.41992	-0.20137
0.35009	0.51399	0.35008	0.49049	0.35008	0.44643	0.35008	0.40422	0.35008	0.36255	0.35008	0.32726	0.35008	0.30429	-0.40992	-0.30887	-0.40992	-0.25353	-0.40992	-0.19588
0.40012	0.6383	0.40012	0.61306	0.40012	0.5515	0.40012	0.50064	0.40012	0.44411	0.40012	0.40282	0.40012	0.37208	-0.39992	-0.29696	-0.39992	-0.24668	-0.39992	-0.20407
0.45012	0.77741	0.45012	0.74829	0.45011	0.66832	0.45012	0.6074	0.45011	0.53414	0.45012	0.48453	0.45012	0.4469	-0.38992	-0.28748	-0.38992	-0.23782	-0.38992	-0.20755
0.50009	0.92556	0.50009	0.89511	0.50009	0.79289	0.50009	0.72429	0.50009	0.63416	0.50009	0.57372	0.50009	0.52971	-0.37992	-0.2769	-0.37992	-0.22958	-0.37991	-0.20108
0.55009	1.08378	0.55009	1.05337	0.55008	0.92724	0.55008	0.85114	0.55008	0.74021	0.55008	0.67187	0.55008	0.61924	-0.36992	-0.26584	-0.36992	-0.22104	-0.36991	-0.19668
0.60013	1.2511	0.60013	1.22016	0.60013	1.07001	0.60013	0.98659	0.60012	0.85517	0.60012	0.77776	0.60012	0.71664	-0.35991	-0.25589	-0.35991	-0.21276	-0.35991	-0.18574
0.65013	1.42433	0.65013	1.39417	0.65012	1.21963	0.65012	1.12958	0.65012	0.9819	0.65012	0.88979	0.65012	0.82061	-0.34991	-0.24484	-0.34991	-0.20455	-0.34991	-0.17343
0.70012	1.58372	0.70012	1.55802	0.70013	1.38103	0.70013	1.28474	0.70012	1.11169	0.70012	1.01122	0.70012	0.93526	-0.33991	-0.23468	-0.33991	-0.19658	-0.3399	-0.16973
0.75009	1.76993	0.75009	1.74856	0.75009	1.53214	0.75009	1.43003	0.7501	1.25179	0.7501	1.14237	0.7501	1.05388	-0.32992	-0.22535	-0.32992	-0.18881	-0.32992	-0.15854
0.80011	1.96115	0.80011	1.94725	0.80011	1.70843	0.80011	1.6013	0.80012	1.39777	0.80012	1.28437	0.80012	1.18409	-0.31992	-0.21618	-0.31992	-0.18126	-0.31992	-0.15392
0.85011	2.16812	0.85011	2.15211	0.85011	1.89107	0.85011	1.77873	0.85011	1.54067	0.85012	1.42748	0.85012	1.32298	-0.30992	-0.20719	-0.30992	-0.17494	-0.30992	-0.1456
0.90011	2.37465	0.90011	2.36303	0.90011	2.08298	0.90011	1.96661	0.90011	1.70555	0.9001	1.5738	0.9001	1.4672	-0.29991	-0.19883	-0.29991	-0.1676	-0.29991	-0.14345
0.95011	2.59171	0.95011	2.57947	0.95011	2.28298	0.95011	2.16024	0.95011	1.87827	0.95011	1.73222	0.95011	1.62658	-0.28991	-0.18906	-0.28991	-0.16095	-0.28991	-0.13535
1.00015	2.81382	1.00015	2.8057	1.00015	2.48757	1.00015	2.36064	1.00015	2.06185	1.00014	1.90439	1.00014	1.79465	-0.27991	-0.18078	-0.27991	-0.15409	-0.27991	-0.13009
1.05013	3.0561	1.05013	3.03558	1.05013	2.69785	1.05013	2.57115	1.05013	2.25342	1.05012	2.08709	1.05012	1.97842	-0.26991	-0.17233	-0.26991	-0.14709	-0.26991	-0.1292
1.10012	3.28434	1.10013	3.29154	1.10012	2.92227	1.10012	2.78625	1.10012	2.45386	1.10012	2.27985	1.10012	2.16652	-0.25991	-0.16412	-0.25991	-0.14008	-0.25991	-0.12163
1.15016	3.54267	1.15016	3.53703	1.15016	3.14825	1.15016	3.0223	1.15016	2.67461	1.15016	2.4772	1.15016	2.3633	-0.24988	-0.15595	-0.24988	-0.1336	-0.24988	-0.11649
1.20016	3.81044	1.20016	3.80056	1.20016	3.38308	1.20016	3.24714	1.20016	2.89581	1.20015	2.69053	1.20015	2.57694	-0.23988	-0.14832	-0.23989	-0.12712	-0.23988	-0.11201
1.25015	4.07753	1.25016	4.08102	1.25016	3.63833	1.25016	3.48773	1.25016	3.11701	1.25015	2.91223	1.25015	2.80159	-0.22989	-0.14016	-0.22989	-0.12053	-0.2299	-0.10527
1.30013	4.35511	1.30013	4.36712	1.30013	3.90669	1.30013	3.74543	1.30013	3.36061	1.30012	3.12763	1.30012	3.03716	-0.21989	-0.13274	-0.21989	-0.11499	-0.21989	-0.09947
1.30013	4.33189	1.30013	4.31995	1.30013	3.86653	1.30013	3.71732	1.30013	3.34056	1.30012	3.07666	1.30012	3.01351	-0.20989	-0.12525	-0.2099	-0.10867	-0.20991	-0.09431
1.25015	3.99241	1.25016	3.99059	1.25016	3.54585	1.25016	3.39888	1.25016	3.05418	1.25015	2.7909	1.25015	2.72705	-0.1999	-0.11806	-0.1999	-0.10266	-0.1999	-0.09061
1.20016	3.67832	1.20016	3.67014	1.20016	3.25987	1.20016	3.11806	1.20016	2.7795	1.20015	2.57701	1.20015	2.48006	-0.18992	-0.1109	-0.18992	-0.09657	-0.18991	-0.08525
1.15016	3.39141	1.15016	3.36734	1.15016	2.99251	1.15016	2.84441	1.15016	2.53446	1.15016	2.34151	1.15015	2.24931	-0.17992	-0.10428	-0.17992	-0.09108	-0.17991	-0.08015
1.10012	3.12022	1.10012	3.08789	1.10012	2.73669	1.10012	2.59457	1.10012	2.30837	1.10012	2.12556	1.10012	2.03659	-0.16992	-0.09734	-0.16992	-0.08535	-0.16992	-0.07686
1.05013	2.86283	1.05013	2.82938	1.05013	2.5057	1.05013	2.35629	1.05013	2.10015	1.05012	1.92682	1.05012	1.83967	-0.15992	-0.09096	-0.15992	-0.07971	-0.15992	-0.07202
1.00015	2.61485	1.00015	2.57524	1.00015	2.27912	1.00015	2.14167	1.00015	1.89723	1.00014	1.74463	1.00014	1.66146	-0.14993	-0.08462	-0.14992	-0.07436	-0.14992	-0.06734
0.95011	2.38001	0.95011	2.34394	0.95011	2.07285	0.95011	1.93864	0.95011	1.71838	0.95011	1.57682	0.95011	1.49135	-0.13993	-0.07827	-0.13993	-0.06888	-0.13993	-0.06297
0.90011	2.15687	0.90011	2.12409	0.90011	1.87405	0.90011	1.75138	0.90011	1.54532	0.9001	1.41713	0.9001	1.33754	-0.12992	-0.07196	-0.12993	-0.0638	-0.12993	-0.05676
0.85011	1.95365	0.85011	1.91346	0.85011	1.69407	0.85011	1.57599	0.85011	1.38963	0.85011	1.2687	0.85011	1.19042	-0.11992	-0.06594	-0.11992	-0.05849	-0.11992	-0.05217
0.80011	1.75922	0.80011	1.72039	0.80011	1.5202	0.80011	1.40697	0.80011	1.24031	0.80011	1.12597	0.80012	1.0618	-0.10992	-0.0599	-0.10992	-0.05334	-0.10992	-0.0479
0.75009	1.57652	0.75009	1.53767	0.75009	1.35729	0.7501	1.25161	0.7501	1.09946	0.7501	0.98283	0.7501	0.93962	-0.09992	-0.05407	-0.09992	-0.04832	-0.09992	-0.04241
0.70012	1.40488	0.70012	1.36838	0.70011	1.20235	0.70013	1.10809	0.70012	0.96993	0.70012	0.89325	0.70012	0.82593	-0.08992	-0.04834	-0.08992	-0.04342	-0.08992	-0.03873
0.65012	1.24093	0.65011	1.20435	0.65012	1.05997	0.65012	0.97152	0.65012	0.85258	0.65012	0.77698	0.65012	0.72033	-0.07991	-0.04307	-0.07991	-0.03838	-0.07991	-0.03479
0.60013	1.09138	0.60013	1.05344	0.60012	0.92291	0.60013	0.84773	0.60012	0.7413	0.60012	0.67517	0.60012	0.62382	-0.06991	-0.03754	-0.06991	-0.0336	-0.06991	-0.03028
0.55008	0.94555	0.55008	0.91072	0.55008	0.79992	0.55008	0.7324	0.55008	0.63909	0.55008	0.58354	0.55008	0.53627	-0.05992	-0.03202	-0.05992	-0.02885	-0.05992	-0.02639
0.50009	0.81074	0.50009	0.78074	0.50009	0.68562	0.50009	0.62386	0.50009	0.54487	0.50009	0.49772	0.50009	0.45713	-0.04992	-0.02677	-0.04992	-0.02401	-0.04992	-0.02215
0.45012	0.68584	0.45012	0.65727	0.45011	0.57937	0.45011	0.52492	0.45011	0.45787	0.45011	0.41833	0.45012	0.38471	-0.03992	-0.02139	-0.03992	-0.01929	-0.03992	-0.0179
0.40012	0.56987	0.40012	0.54424	0.40012	0.48131	0.40012	0.43415	0.40012	0.38008	0.40012	0.34827	0.40012	0.31849	-0.02991	-0.01612	-0.02991	-0.01455	-0.02991	-0.01345
0.35009	0.4636	0.35008	0.43993	0.35008	0.39097	0.35008	0.35253	0.35008	0.3088	0.35008	0.2834	0.35008	0.26001	-0.01992	-0.01084	-0.01992	-0.0098	-0.01992	-0.00907
0.30009	0.36717	0.30009	0.34783	0.30008	0.31028	0.30008	0.27836	0.30008	0.24548	0.30009	0.22628	0.30009	0.20728	-0.00991	-0.00559	-0.00991	-0.00511	-0.00991	-0.00467
0.25009	0.28211	0.25009	0.26608	0.25008	0.23802	0.25008	0.21296	0.25008	0.18966	0.25009	0.17511	0.25009	0.16042	7.54682e-05	-0.000566737	7.62713e-05	-0.000573696	8.00859e-05	-0.000490317
0.20011	0.20727	0.2001	0.19422	0.2001	0.17531	0.2001	0.15675	0.2001	0.14042	0.20011	0.12947	0.20011	0.11932	0.0101	0.00496	0.0101	0.00438	0.0101	0.00405
0.1501	0.14234	0.15009	0.13331	0.15009	0.12118	0.1501	0.10813	0.1501	0.09782	0.15011	0.09063	0.15011	0.08333	0.02011	0.01031	0.02011	0.00921	0.02011	0.00853
0.1001	0.08779	0.1001	0.08195	0.1001	0.07507	0.1001	0.06663	0.10009	0.06082	0.1001	0.05637	0.1001	0.05202	0.0301	0.01575	0.03011	0.01412	0.03011	0.01306
0.0501	0.04139	0.0501	0.03851	0.05009	0.03539	0.05009	0.03123	0.05009	0.02869	0.0501	0.02646	0.0501	0.02432	0.0401	0.02127	0.0401	0.0191	0.0401	0.01748
7.38665e-05	-0.000668557	6.96504e-05	-0.000629429	6.90481e-05	-0.000568486	6.53338e-05	-0.000637223	6.98511e-05	-0.000568063	7.91824e-05	-0.000555705	7.80782e-05	-0.000637429	0.0501	0.02689	0.0501	0.0252	0.0501	0.02194
-0.04993	-0.04328	-0.04993	-0.04013	-0.04993	-0.03703	-0.04993	-0.03265	-0.04993	-0.02985	-0.04992	-0.0276	-0.04992	-0.02511	0.0601	0.03261	0.0601	0.03071	0.0601	0.02664
-0.09993	-0.09293	-0.09993	-0.08628	-0.09993	-0.07913	-0.09993	-0.06954	-0.09993	-0.06261	-0.09992	-0.05709	-0.09992	-0.05157	0.0701	0.03842	0.0701	0.03616	0.07009	0.03146
-0.14993	-0.15443	-0.14994	-0.14366	-0.14994	-0.12953	-0.14994	-0.11356	-0.14994	-0.10095	-0.14993	-0.09095	-0.14992	-0.0823	0.0801	0.04441	0.0801	0.04174	0.0801	0.03617
-0.1999	-0.22932	-0.19991	-0.21506	-0.19991	-0.19181	-0.19991	-0.16832	-0.19991	-0.14735	-0.19991	-0.13074	-0.1999	-0.11706	0.0901	0.05064	0.0901	0.04741	0.0901	0.04104
-0.24989	-0.32113	-0.2499	-0.30212	-0.2499	-0.26568	-0.2499	-0.23366	-0.2499	-0.20099	-0.24988	-0.17972	-0.24988	-0.15854	0.1001	0.05694	0.1001	0.05324	0.1001	0.04684
-0.29992	-0.43104	-0.29993	-0.40694	-0.29993	-0.35315	-0.29993	-0.30989	-0.29993	-0.26373	-0.29992	-0.23481	-0.29991	-0.20402	0.11011	0.06299	0.11011	0.05928	0.11011	0.05167
-0.34993	-0.55933	-0.34993	-0.52937	-0.34993	-0.4529	-0.34993	-0.39826	-0.34993	-0.33626	-0.34992	-0.29722	-0.34991	-0.25718	0.12011	0.0697	0.12011	0.06531	0.12011	0.05782
-0.39993	-0.71212	-0.39994	-0.67437	-0.39994	-0.57057	-0.39994	-0.50097	-0.39994	-0.41905	-0.39992	-0.36935	-0.39992	-0.31854	0.13011	0.07655	0.13011	0.07159	0.13011	0.06321
-0.44993	-0.88631	-0.44994	-0.83903	-0.44994	-0.7047	-0.44994	-0.6182	-0.44994	-0.51318	-0.44992	-0.45137	-0.44992	-0.38562	0.14011	0.08342	0.14011	0.07811	0.14011	0.06847
-0.49991	-1.08357	-0.49992	-1.02796	-0.49992	-0.85554	-0.49992	-0.75123	-0.49992	-0.61753	-0.4999	-0.54251	-0.49989	-0.4619	0.15011	0.0906	0.15011	0.08459	0.15011	0.07486
-0.5499	-1.30594	-0.54991	-1.24246	-0.54991	-1.0261	-0.54991	-0.90125	-0.54991	-0.73825	-0.54989	-0.64747	-0.54989	-0.54933	0.16011	0.09766	0.16011	0.09141	0.1601	0.08083
-0.59991	-1.5519	-0.59991	-1.47389	-0.59993	-1.22197	-0.59992	-1.0701	-0.59992	-0.87376	-0.5999	-0.76506	-0.5999	-0.6506	0.17011	0.10488	0.17011	0.0982	0.17011	0.08525
--	--	--	--	--	--	--	--	--	--	--	--	--	--	0.1801	0.1128	0.1801	0.10512	0.1801	0.09094
--	--	--	--	--	--	--	--	--	--	--	--	--	--	0.1901	0.12046	0.1901	0.11242	0.1901	0.09753
--	--	--	--	--	--	--	--	--	--	--	--	--	--	0.20012	0.12873	0.20012	0.11965	0.20012	0.09139
--	--	--	--	--	--	--	--	--	--	--	--	--	--	0.21012	0.13684	0.21012	0.12703	0.21011	0.09466
--	--	--	--	--	--	--	--	--	--	--	--	--	--	0.2201	0.14486	0.22012	0.13502	0.22011	0.10175
--	--	--	--	--	--	--	--	--	--	--	--	--	--	0.2301	0.15344	0.23011	0.14298	0.23011	0.10769
--	--	--	--	--	--	--	--	--	--	--	--	--	--	0.2401	0.16214	0.2401	0.15029	0.24011	0.11321
--	--	--	--	--	--	--	--	--	--	--	--	--	--	0.25009	0.171	0.25009	0.15602	0.2501	0.11908
--	--	--	--	--	--	--	--	--	--	--	--	--	--	0.26009	0.18028	0.26009	0.16247	0.2601	0.12536
--	--	--	--	--	--	--	--	--	--	--	--	--	--	0.27009	0.18962	0.27009	0.16448	0.27009	0.13625
--	--	--	--	--	--	--	--	--	--	--	--	--	--	0.28009	0.20015	0.28009	0.17205	0.28009	0.13979
--	--	--	--	--	--	--	--	--	--	--	--	--	--	0.29009	0.20935	0.29009	0.19328	0.29009	0.14528
--	--	--	--	--	--	--	--	--	--	--	--	--	--	0.30009	0.21983	0.30009	0.18938	0.30009	0.15134
--	--	--	--	--	--	--	--	--	--	--	--	--	--	0.31009	0.23013	0.31009	0.21347	0.31009	0.18383
--	--	--	--	--	--	--	--	--	--	--	--	--	--	0.32009	0.24095	0.32009	0.22305	0.32009	0.19417
--	--	--	--	--	--	--	--	--	--	--	--	--	--	0.33009	0.25155	0.33009	0.23282	0.33009	0.20393
--	--	--	--	--	--	--	--	--	--	--	--	--	--	0.34008	0.26233	0.34008	0.24274	0.34008	0.21351
--	--	--	--	--	--	--	--	--	--	--	--	--	--	0.35008	0.27372	0.35008	0.25312	0.35008	0.22232
--	--	--	--	--	--	--	--	--	--	--	--	--	--	0.36009	0.28451	0.36008	0.26341	0.36008	0.19284
--	--	--	--	--	--	--	--	--	--	--	--	--	--	0.37009	0.29638	0.37009	0.27394	0.37009	0.1977
--	--	--	--	--	--	--	--	--	--	--	--	--	--	0.38009	0.30925	0.38009	0.26458	0.38009	0.2051
--	--	--	--	--	--	--	--	--	--	--	--	--	--	0.39012	0.32081	0.39012	0.27189	0.39012	0.20871
--	--	--	--	--	--	--	--	--	--	--	--	--	--	0.40012	0.33331	0.40012	0.28176	0.40012	0.21337
--	--	--	--	--	--	--	--	--	--	--	--	--	--	0.41013	0.34623	0.41012	0.29152	0.41012	0.22228
--	--	--	--	--	--	--	--	--	--	--	--	--	--	0.42012	0.35885	0.42012	0.30284	0.42012	0.28521
--	--	--	--	--	--	--	--	--	--	--	--	--	--	0.43012	0.37248	0.43012	0.31235	0.43012	0.29579
--	--	--	--	--	--	--	--	--	--	--	--	--	--	0.44012	0.38625	0.44012	0.32503	0.44012	0.29882
--	--	--	--	--	--	--	--	--	--	--	--	--	--	0.45012	0.40007	0.45011	0.33568	0.45011	0.27741
--	--	--	--	--	--	--	--	--	--	--	--	--	--	0.46011	0.41532	0.46011	0.34799	0.46011	0.31357
--	--	--	--	--	--	--	--	--	--	--	--	--	--	0.47011	0.4291	0.47011	0.3604	0.4701	0.3265
--	--	--	--	--	--	--	--	--	--	--	--	--	--	0.4801	0.44257	0.4801	0.37196	0.4801	0.34413
--	--	--	--	--	--	--	--	--	--	--	--	--	--	0.49009	0.45695	0.49009	0.38432	0.49009	0.35178
--	--	--	--	--	--	--	--	--	--	--	--	--	--	0.50009	0.47335	0.50009	0.39622	0.50009	0.34797
--	--	--	--	--	--	--	--	--	--	--	--	--	--	0.51009	0.48896	0.51009	0.40853	0.51009	0.36641
--	--	--	--	--	--	--	--	--	--	--	--	--	--	0.52009	0.50359	0.52008	0.41931	0.52008	0.37937
--	--	--	--	--	--	--	--	--	--	--	--	--	--	0.53008	0.51988	0.53008	0.43337	0.53008	0.39773
--	--	--	--	--	--	--	--	--	--	--	--	--	--	0.54008	0.53681	0.54008	0.44483	0.54007	0.41125
--	--	--	--	--	--	--	--	--	--	--	--	--	--	0.55008	0.55346	0.55008	0.45892	0.55008	0.42574
--	--	--	--	--	--	--	--	--	--	--	--	--	--	0.56008	0.57124	0.56008	0.47326	0.56009	0.44145
--	--	--	--	--	--	--	--	--	--	--	--	--	--	0.57008	0.58751	0.57008	0.4867	0.57008	0.43501
--	--	--	--	--	--	--	--	--	--	--	--	--	--	0.58012	0.60518	0.58012	0.50297	0.58012	0.44984
--	--	--	--	--	--	--	--	--	--	--	--	--	--	0.59012	0.62308	0.59012	0.51546	0.59012	0.45942
--	--	--	--	--	--	--	--	--	--	--	--	--	--	0.60012	0.64335	0.60012	0.52946	0.60012	0.46087
--	--	--	--	--	--	--	--	--	--	--	--	--	--	0.61011	0.66106	0.61011	0.53966	0.61011	0.48059
--	--	--	--	--	--	--	--	--	--	--	--	--	--	0.62011	0.67903	0.62011	0.5536	0.62011	0.49317
--	--	--	--	--	--	--	--	--	--	--	--	--	--	0.63012	0.69787	0.63011	0.56996	0.63011	0.50678
--	--	--	--	--	--	--	--	--	--	--	--	--	--	0.64012	0.71653	0.64012	0.58222	0.64012	0.53979
--	--	--	--	--	--	--	--	--	--	--	--	--	--	0.65012	0.73528	0.65012	0.59619	0.65012	0.55565
--	--	--	--	--	--	--	--	--	--	--	--	--	--	0.66012	0.75606	0.66012	0.61217	0.66011	0.56943
--	--	--	--	--	--	--	--	--	--	--	--	--	--	0.67012	0.77805	0.67012	0.62566	0.67012	0.59091
--	--	--	--	--	--	--	--	--	--	--	--	--	--	0.68013	0.79884	0.68012	0.64486	0.68012	0.60384
--	--	--	--	--	--	--	--	--	--	--	--	--	--	0.69013	0.81853	0.69012	0.66002	0.69012	0.59427
--	--	--	--	--	--	--	--	--	--	--	--	--	--	0.70012	0.83829	0.70012	0.67328	0.70012	0.60476
--	--	--	--	--	--	--	--	--	--	--	--	--	--	0.71012	0.86087	0.71012	0.688	0.71011	0.61779
--	--	--	--	--	--	--	--	--	--	--	--	--	--	0.72012	0.88257	0.72012	0.70664	0.72012	0.63474
--	--	--	--	--	--	--	--	--	--	--	--	--	--	0.73012	0.9044	0.73011	0.71927	0.73011	0.64019
--	--	--	--	--	--	--	--	--	--	--	--	--	--	0.74011	0.92672	0.74011	0.74073	0.74011	0.66421
--	--	--	--	--	--	--	--	--	--	--	--	--	--	0.7501	0.95006	0.7501	0.75595	0.7501	0.70775
--	--	--	--	--	--	--	--	--	--	--	--	--	--	0.7601	0.97313	0.76009	0.76978	0.7601	0.71568
--	--	--	--	--	--	--	--	--	--	--	--	--	--	0.77013	0.99635	0.77012	0.79189	0.77012	0.72989
--	--	--	--	--	--	--	--	--	--	--	--	--	--	0.78012	1.02015	0.78012	0.80612	0.78012	0.76188
--	--	--	--	--	--	--	--	--	--	--	--	--	--	0.79012	1.04356	0.79012	0.82263	0.79012	0.78771
--	--	--	--	--	--	--	--	--	--	--	--	--	--	0.80012	1.07	0.80012	0.8444	0.80013	0.78986
--	--	--	--	--	--	--	--	--	--	--	--	--	--	0.81012	1.09307	0.81011	0.8581	0.81011	0.81031
--	--	--	--	--	--	--	--	--	--	--	--	--	--	0.82012	1.1167	0.82011	0.88411	0.82011	0.82733
--	--	--	--	--	--	--	--	--	--	--	--	--	--	0.83012	1.14183	0.83012	0.89815	0.83011	0.80594
--	--	--	--	--	--	--	--	--	--	--	--	--	--	0.84012	1.1674	0.84011	0.91253	0.84012	0.86083
--	--	--	--	--	--	--	--	--	--	--	--	--	--	0.85012	1.19377	0.85012	0.93216	0.85012	0.86841
--	--	--	--	--	--	--	--	--	--	--	--	--	--	0.86012	1.22108	0.86012	0.94887	0.86011	0.85978
--	--	--	--	--	--	--	--	--	--	--	--	--	--	0.87012	1.24698	0.87012	0.96597	0.87012	0.88214
--	--	--	--	--	--	--	--	--	--	--	--	--	--	0.88012	1.27319	0.88012	0.9728	0.88012	0.90235
--	--	--	--	--	--	--	--	--	--	--	--	--	--	0.89011	1.30203	0.89011	0.99431	0.89011	0.91267
--	--	--	--	--	--	--	--	--	--	--	--	--	--	0.90011	1.32804	0.90011	1.01318	0.90011	0.96956
--	--	--	--	--	--	--	--	--	--	--	--	--	--	0.91012	1.3552	0.91011	1.03567	0.91011	0.97856
--	--	--	--	--	--	--	--	--	--	--	--	--	--	0.92012	1.39019	0.92011	1.06323	0.92011	0.97181
--	--	--	--	--	--	--	--	--	--	--	--	--	--	0.93012	1.41847	0.93012	1.08912	0.93012	0.99649
--	--	--	--	--	--	--	--	--	--	--	--	--	--	0.94011	1.44234	0.94012	1.10844	0.94012	1.01241
--	--	--	--	--	--	--	--	--	--	--	--	--	--	0.95011	1.46726	0.95012	1.13019	0.95011	1.039
--	--	--	--	--	--	--	--	--	--	--	--	--	--	0.96015	1.49874	0.96016	1.14877	0.96016	1.06965
--	--	--	--	--	--	--	--	--	--	--	--	--	--	0.97014	1.52778	0.97016	1.16686	0.97016	1.12141
--	--	--	--	--	--	--	--	--	--	--	--	--	--	0.98014	1.55793	0.98015	1.19606	0.98015	1.13854
--	--	--	--	--	--	--	--	--	--	--	--	--	--	0.99014	1.5864	0.99016	1.21495	0.99017	1.16268
--	--	--	--	--	--	--	--	--	--	--	--	--	--	1.00014	1.61726	1.00015	1.23783	1.00015	1.18779
--	--	--	--	--	--	--	--	--	--	--	--	--	--	1.01014	1.64838	1.01015	1.27923	1.01016	1.16759
--	--	--	--	--	--	--	--	--	--	--	--	--	--	1.02013	1.68339	1.02014	1.29757	1.02014	1.20808
--	--	--	--	--	--	--	--	--	--	--	--	--	--	1.03013	1.71489	1.03013	1.32377	1.03013	1.22489
--	--	--	--	--	--	--	--	--	--	--	--	--	--	1.04012	1.75059	1.04014	1.34973	1.04012	1.19551
--	--	--	--	--	--	--	--	--	--	--	--	--	--	1.05012	1.78183	1.05013	1.36462	1.05015	1.25249
--	--	--	--	--	--	--	--	--	--	--	--	--	--	1.06012	1.81481	1.06013	1.38847	1.06014	1.23229
--	--	--	--	--	--	--	--	--	--	--	--	--	--	1.07012	1.84772	1.07013	1.40484	1.07013	1.28456
--	--	--	--	--	--	--	--	--	--	--	--	--	--	1.08012	1.88372	1.08012	1.43256	1.08013	1.30751
--	--	--	--	--	--	--	--	--	--	--	--	--	--	1.09012	1.91803	1.09011	1.44293	1.09013	1.36868
--	--	--	--	--	--	--	--	--	--	--	--	--	--	1.10012	1.95044	1.10012	1.47536	1.10012	1.40323
--	--	--	--	--	--	--	--	--	--	--	--	--	--	1.11012	1.98521	1.11012	1.48664	1.11013	1.4367
--	--	--	--	--	--	--	--	--	--	--	--	--	--	1.12012	2.0214	1.12012	1.5148	1.12011	1.45993
--	--	--	--	--	--	--	--	--	--	--	--	--	--	1.13012	2.05249	1.13012	1.54183	1.13012	1.47007
--	--	--	--	--	--	--	--	--	--	--	--	--	--	1.14012	2.08996	1.14012	1.53832	1.14012	1.12831
--	--	--	--	--	--	--	--	--	--	--	--	--	--	1.15015	2.12357	1.15015	1.58697	1.15016	1.13106
--	--	--	--	--	--	--	--	--	--	--	--	--	--	1.16014	2.16526	1.16014	1.60655	1.16014	1.21579
--	--	--	--	--	--	--	--	--	--	--	--	--	--	1.17015	2.19656	1.17015	1.62356	1.17014	1.3628
--	--	--	--	--	--	--	--	--	--	--	--	--	--	1.18015	2.2366	1.18015	1.64907	1.18015	1.70627
--	--	--	--	--	--	--	--	--	--	--	--	--	--	1.19015	2.27495	1.19015	1.66857	1.19015	1.7378
--	--	--	--	--	--	--	--	--	--	--	--	--	--	1.20015	2.31122	1.20015	1.70868	1.20015	1.77139
--	--	--	--	--	--	--	--	--	--	--	--	--	--	1.21015	2.35321	1.21015	1.74336	1.21015	1.80538
--	--	--	--	--	--	--	--	--	--	--	--	--	--	1.22015	2.39128	1.22015	1.77022	1.22015	1.85182
--	--	--	--	--	--	--	--	--	--	--	--	--	--	1.23015	2.43239	1.23015	1.79431	1.23015	1.8539
--	--	--	--	--	--	--	--	--	--	--	--	--	--	1.24015	2.47253	1.24015	1.82927	1.24015	1.27352
--	--	--	--	--	--	--	--	--	--	--	--	--	--	1.25015	2.51289	1.25015	1.85088	1.25014	1.32448
--	--	--	--	--	--	--	--	--	--	--	--	--	--	1.26014	2.55373	1.26014	1.88178	1.26015	1.39132
--	--	--	--	--	--	--	--	--	--	--	--	--	--	1.27014	2.60397	1.27014	1.90443	1.27014	1.20802
--	--	--	--	--	--	--	--	--	--	--	--	--	--	1.28014	2.6398	1.28013	1.9491	1.28013	1.19301
--	--	--	--	--	--	--	--	--	--	--	--	--	--	1.29013	2.67825	1.29013	1.98095	1.29013	1.19618
--	--	--	--	--	--	--	--	--	--	--	--	--	--	1.30012	2.72645	1.30012	1.98939	1.30011	1.22284
--	--	--	--	--	--	--	--	--	--	--	--	--	--	1.30012	2.71138	1.30012	1.99449	1.30012	1.31877
--	--	--	--	--	--	--	--	--	--	--	--	--	--	1.29013	2.66385	1.29013	1.94707	1.29013	1.27682
--	--	--	--	--	--	--	--	--	--	--	--	--	--	1.28014	2.61122	1.28013	1.91132	1.28013	1.30782
--	--	--	--	--	--	--	--	--	--	--	--	--	--	1.27014	2.5679	1.27014	1.88537	1.27014	1.35095
--	--	--	--	--	--	--	--	--	--	--	--	--	--	1.26014	2.51518	1.26014	1.83563	1.26014	1.31385
--	--	--	--	--	--	--	--	--	--	--	--	--	--	1.25015	2.46958	1.25015	1.82042	1.25015	1.35976
--	--	--	--	--	--	--	--	--	--	--	--	--	--	1.24015	2.42482	1.24015	1.79916	1.24015	1.35144
--	--	--	--	--	--	--	--	--	--	--	--	--	--	1.23015	2.38003	1.23015	1.76512	1.23016	1.31517
--	--	--	--	--	--	--	--	--	--	--	--	--	--	1.22015	2.33102	1.22015	1.73365	1.22015	1.23815
--	--	--	--	--	--	--	--	--	--	--	--	--	--	1.21015	2.28886	1.21015	1.71306	1.21015	1.27336
--	--	--	--	--	--	--	--	--	--	--	--	--	--	1.20015	2.24151	1.20015	1.68523	1.20013	1.16361
--	--	--	--	--	--	--	--	--	--	--	--	--	--	1.19015	2.19775	1.19015	1.66315	1.19015	1.80384
--	--	--	--	--	--	--	--	--	--	--	--	--	--	1.18015	2.15215	1.18015	1.6335	1.18015	1.7843
--	--	--	--	--	--	--	--	--	--	--	--	--	--	1.17015	2.11366	1.17015	1.60341	1.17014	1.73619
--	--	--	--	--	--	--	--	--	--	--	--	--	--	1.16015	2.07222	1.16015	1.5877	1.16015	1.71279
--	--	--	--	--	--	--	--	--	--	--	--	--	--	1.15015	2.03446	1.15015	1.55417	1.15015	1.60878
--	--	--	--	--	--	--	--	--	--	--	--	--	--	1.14012	1.99276	1.14012	1.53457	1.14012	0.83224
--	--	--	--	--	--	--	--	--	--	--	--	--	--	1.13012	1.95445	1.13012	1.50763	1.13013	0.79898
--	--	--	--	--	--	--	--	--	--	--	--	--	--	1.12012	1.91627	1.12012	1.47423	1.12013	0.76388
--	--	--	--	--	--	--	--	--	--	--	--	--	--	1.11012	1.87672	1.11012	1.45902	1.11012	0.79972
--	--	--	--	--	--	--	--	--	--	--	--	--	--	1.10012	1.83919	1.10012	1.42874	1.10012	0.77602
--	--	--	--	--	--	--	--	--	--	--	--	--	--	1.09012	1.80136	1.09012	1.40517	1.09013	0.73741
--	--	--	--	--	--	--	--	--	--	--	--	--	--	1.08011	1.76225	1.08011	1.3852	1.08011	0.73072
--	--	--	--	--	--	--	--	--	--	--	--	--	--	1.07012	1.72743	1.07012	1.34865	1.07013	0.73185
--	--	--	--	--	--	--	--	--	--	--	--	--	--	1.06012	1.6935	1.06012	1.32839	1.06013	0.70338
--	--	--	--	--	--	--	--	--	--	--	--	--	--	1.05012	1.66011	1.05012	1.29672	1.05012	0.72524
--	--	--	--	--	--	--	--	--	--	--	--	--	--	1.04012	1.62737	1.04012	1.27621	1.04013	0.72344
--	--	--	--	--	--	--	--	--	--	--	--	--	--	1.03013	1.59661	1.03013	1.25354	1.03014	0.7085
--	--	--	--	--	--	--	--	--	--	--	--	--	--	1.02012	1.56173	1.02013	1.21628	1.02013	0.70125
--	--	--	--	--	--	--	--	--	--	--	--	--	--	1.01014	1.53124	1.01014	1.20611	1.01014	0.70378
--	--	--	--	--	--	--	--	--	--	--	--	--	--	1.00014	1.50142	1.00014	1.17791	1.00015	0.68894
--	--	--	--	--	--	--	--	--	--	--	--	--	--	0.99014	1.46827	0.99014	1.15008	0.99015	0.68686
--	--	--	--	--	--	--	--	--	--	--	--	--	--	0.98014	1.43554	0.98014	1.1332	0.98015	0.68228
--	--	--	--	--	--	--	--	--	--	--	--	--	--	0.97014	1.4065	0.97015	1.10929	0.97015	0.67439
--	--	--	--	--	--	--	--	--	--	--	--	--	--	0.96015	1.37718	0.96015	1.0986	0.96015	0.66108
--	--	--	--	--	--	--	--	--	--	--	--	--	--	0.95011	1.34702	0.95012	1.07299	0.95011	0.65481
--	--	--	--	--	--	--	--	--	--	--	--	--	--	0.94011	1.32002	0.94012	1.05167	0.94011	0.633
--	--	--	--	--	--	--	--	--	--	--	--	--	--	0.93011	1.292	0.93011	1.03288	0.93011	0.59917
--	--	--	--	--	--	--	--	--	--	--	--	--	--	0.92011	1.26395	0.92011	1.00749	0.92011	0.59683
--	--	--	--	--	--	--	--	--	--	--	--	--	--	0.9101	1.23413	0.91011	0.98623	0.91011	0.58399
--	--	--	--	--	--	--	--	--	--	--	--	--	--	0.9001	1.20547	0.90011	0.96974	0.90011	0.57142
--	--	--	--	--	--	--	--	--	--	--	--	--	--	0.8901	1.18159	0.89011	0.94824	0.89011	0.55985
--	--	--	--	--	--	--	--	--	--	--	--	--	--	0.88011	1.15446	0.88012	0.9273	0.88012	0.55543
--	--	--	--	--	--	--	--	--	--	--	--	--	--	0.87011	1.12977	0.87012	0.90679	0.87011	0.54874
--	--	--	--	--	--	--	--	--	--	--	--	--	--	0.86012	1.10348	0.86012	0.88892	0.86011	0.54537
--	--	--	--	--	--	--	--	--	--	--	--	--	--	0.85012	1.07981	0.85011	0.87372	0.85012	0.5269
--	--	--	--	--	--	--	--	--	--	--	--	--	--	0.84012	1.05339	0.84012	0.8524	0.84011	0.517
--	--	--	--	--	--	--	--	--	--	--	--	--	--	0.83012	1.03171	0.83011	0.83957	0.8301	0.49772
--	--	--	--	--	--	--	--	--	--	--	--	--	--	0.82012	1.00762	0.82011	0.82107	0.82011	0.47306
--	--	--	--	--	--	--	--	--	--	--	--	--	--	0.81012	0.98235	0.81011	0.80341	0.81011	0.45947
--	--	--	--	--	--	--	--	--	--	--	--	--	--	0.80012	0.95865	0.80011	0.78865	0.80011	0.4628
--	--	--	--	--	--	--	--	--	--	--	--	--	--	0.79012	0.93555	0.79012	0.76806	0.79012	0.44766
--	--	--	--	--	--	--	--	--	--	--	--	--	--	0.78012	0.91373	0.78012	0.75058	0.78012	0.44372
--	--	--	--	--	--	--	--	--	--	--	--	--	--	0.77013	0.89108	0.77012	0.73427	0.77012	0.44073
--	--	--	--	--	--	--	--	--	--	--	--	--	--	0.76009	0.86814	0.76009	0.71417	0.76009	0.43796
--	--	--	--	--	--	--	--	--	--	--	--	--	--	0.7501	0.84845	0.7501	0.70102	0.7501	0.42683
--	--	--	--	--	--	--	--	--	--	--	--	--	--	0.74011	0.82644	0.74011	0.68647	0.7401	0.42004
--	--	--	--	--	--	--	--	--	--	--	--	--	--	0.73012	0.80504	0.73011	0.66896	0.73011	0.40917
--	--	--	--	--	--	--	--	--	--	--	--	--	--	0.72012	0.78471	0.72011	0.65599	0.72011	0.38994
--	--	--	--	--	--	--	--	--	--	--	--	--	--	0.71012	0.76431	0.71012	0.64118	0.71011	0.38468
--	--	--	--	--	--	--	--	--	--	--	--	--	--	0.70012	0.74516	0.70012	0.62343	0.70011	0.37957
--	--	--	--	--	--	--	--	--	--	--	--	--	--	0.69012	0.72772	0.69012	0.61018	0.69013	0.37206
--	--	--	--	--	--	--	--	--	--	--	--	--	--	0.68013	0.70618	0.68012	0.59348	0.68011	0.35508
--	--	--	--	--	--	--	--	--	--	--	--	--	--	0.67012	0.68689	0.67012	0.58161	0.67012	0.35096
--	--	--	--	--	--	--	--	--	--	--	--	--	--	0.66012	0.67001	0.66012	0.56737	0.66012	0.34843
--	--	--	--	--	--	--	--	--	--	--	--	--	--	0.65012	0.65197	0.65012	0.55165	0.65011	0.34746
--	--	--	--	--	--	--	--	--	--	--	--	--	--	0.64012	0.63334	0.64011	0.5372	0.64011	0.34359
--	--	--	--	--	--	--	--	--	--	--	--	--	--	0.63012	0.61538	0.63011	0.52426	0.63011	0.33304
--	--	--	--	--	--	--	--	--	--	--	--	--	--	0.62011	0.59666	0.62011	0.50999	0.62011	0.32895
--	--	--	--	--	--	--	--	--	--	--	--	--	--	0.61011	0.58111	0.61011	0.49746	0.61011	0.31229
--	--	--	--	--	--	--	--	--	--	--	--	--	--	0.60012	0.56249	0.60012	0.48284	0.60012	0.29991
--	--	--	--	--	--	--	--	--	--	--	--	--	--	0.59012	0.54653	0.59012	0.47011	0.59011	0.30159
--	--	--	--	--	--	--	--	--	--	--	--	--	--	0.58012	0.53002	0.58012	0.45795	0.58012	0.29343
--	--	--	--	--	--	--	--	--	--	--	--	--	--	0.57008	0.51406	0.57008	0.44434	0.57008	0.27751
--	--	--	--	--	--	--	--	--	--	--	--	--	--	0.56008	0.49902	0.56008	0.43258	0.56008	0.27335
--	--	--	--	--	--	--	--	--	--	--	--	--	--	0.55008	0.48455	0.55008	0.41946	0.55008	0.27248
--	--	--	--	--	--	--	--	--	--	--	--	--	--	0.54008	0.46924	0.54008	0.40689	0.54008	0.2651
--	--	--	--	--	--	--	--	--	--	--	--	--	--	0.53008	0.45449	0.53008	0.39607	0.53008	0.25855
--	--	--	--	--	--	--	--	--	--	--	--	--	--	0.52008	0.44035	0.52009	0.38319	0.52008	0.25148
--	--	--	--	--	--	--	--	--	--	--	--	--	--	0.51009	0.42593	0.51009	0.37138	0.51009	0.24672
--	--	--	--	--	--	--	--	--	--	--	--	--	--	0.50009	0.41276	0.50009	0.35968	0.50008	0.24206
--	--	--	--	--	--	--	--	--	--	--	--	--	--	0.49009	0.39963	0.49009	0.34765	0.49009	0.23255
--	--	--	--	--	--	--	--	--	--	--	--	--	--	0.4801	0.38667	0.4801	0.33688	0.4801	0.21616
--	--	--	--	--	--	--	--	--	--	--	--	--	--	0.47011	0.37381	0.4701	0.32661	0.47011	0.21277
--	--	--	--	--	--	--	--	--	--	--	--	--	--	0.46011	0.36092	0.46011	0.31525	0.46011	0.20844
--	--	--	--	--	--	--	--	--	--	--	--	--	--	0.45011	0.3482	0.45011	0.306	0.45011	0.20395
--	--	--	--	--	--	--	--	--	--	--	--	--	--	0.44012	0.33649	0.44012	0.29557	0.44012	0.20915
--	--	--	--	--	--	--	--	--	--	--	--	--	--	0.43012	0.3243	0.43012	0.28451	0.43011	0.20034
--	--	--	--	--	--	--	--	--	--	--	--	--	--	0.42012	0.3128	0.42012	0.27548	0.42012	0.19637
--	--	--	--	--	--	--	--	--	--	--	--	--	--	0.41012	0.30093	0.41013	0.26523	0.41012	0.20299
--	--	--	--	--	--	--	--	--	--	--	--	--	--	0.40012	0.28903	0.40012	0.25571	0.40012	0.25232
--	--	--	--	--	--	--	--	--	--	--	--	--	--	0.39012	0.27807	0.39012	0.24702	0.39012	0.21248
--	--	--	--	--	--	--	--	--	--	--	--	--	--	0.38009	0.26758	0.38009	0.23724	0.38009	0.16172
--	--	--	--	--	--	--	--	--	--	--	--	--	--	0.37009	0.25622	0.37009	0.22804	0.37008	0.15707
--	--	--	--	--	--	--	--	--	--	--	--	--	--	0.36008	0.24554	0.36008	0.21959	0.36008	0.1514
--	--	--	--	--	--	--	--	--	--	--	--	--	--	0.35008	0.23556	0.35008	0.21021	0.35008	0.14698
--	--	--	--	--	--	--	--	--	--	--	--	--	--	0.34008	0.22507	0.34008	0.20199	0.34008	0.14662
--	--	--	--	--	--	--	--	--	--	--	--	--	--	0.33009	0.21592	0.33009	0.19351	0.33009	0.1396
--	--	--	--	--	--	--	--	--	--	--	--	--	--	0.32009	0.20608	0.32009	0.18564	0.32009	0.13481
--	--	--	--	--	--	--	--	--	--	--	--	--	--	0.31009	0.19732	0.31009	0.17789	0.31009	0.13187
--	--	--	--	--	--	--	--	--	--	--	--	--	--	0.30009	0.18824	0.30009	0.16961	0.30009	0.12507
--	--	--	--	--	--	--	--	--	--	--	--	--	--	0.29009	0.17966	0.29009	0.16239	0.29009	0.11989
--	--	--	--	--	--	--	--	--	--	--	--	--	--	0.28009	0.17116	0.28009	0.15473	0.28009	0.11571
--	--	--	--	--	--	--	--	--	--	--	--	--	--	0.27009	0.16269	0.27009	0.14752	0.2701	0.11091
--	--	--	--	--	--	--	--	--	--	--	--	--	--	0.26009	0.15483	0.26009	0.14083	0.26009	0.10388
--	--	--	--	--	--	--	--	--	--	--	--	--	--	0.25009	0.14662	0.25009	0.13316	0.25011	0.09828
--	--	--	--	--	--	--	--	--	--	--	--	--	--	0.2401	0.13867	0.2401	0.1264	0.2401	0.09238
--	--	--	--	--	--	--	--	--	--	--	--	--	--	0.2301	0.13125	0.2301	0.11985	0.23011	0.08695
--	--	--	--	--	--	--	--	--	--	--	--	--	--	0.2201	0.1236	0.2201	0.11301	0.22011	0.08274
--	--	--	--	--	--	--	--	--	--	--	--	--	--	0.2101	0.11618	0.21012	0.10671	0.21011	0.07875
--	--	--	--	--	--	--	--	--	--	--	--	--	--	0.20012	0.10954	0.20012	0.10012	0.20012	0.07403
--	--	--	--	--	--	--	--	--	--	--	--	--	--	0.1901	0.10272	0.1901	0.09409	0.19009	0.06995
--	--	--	--	--	--	--	--	--	--	--	--	--	--	0.1801	0.09612	0.1801	0.08792	0.1801	0.06678
--	--	--	--	--	--	--	--	--	--	--	--	--	--	0.17011	0.08962	0.17011	0.0826	0.1701	0.06214
--	--	--	--	--	--	--	--	--	--	--	--	--	--	0.1601	0.0832	0.16011	0.07688	0.1601	0.05731
--	--	--	--	--	--	--	--	--	--	--	--	--	--	0.15011	0.07703	0.15011	0.07103	0.15011	0.0537
--	--	--	--	--	--	--	--	--	--	--	--	--	--	0.14011	0.07095	0.14011	0.06564	0.14011	0.04981
--	--	--	--	--	--	--	--	--	--	--	--	--	--	0.13011	0.06521	0.13011	0.06034	0.13011	0.04641
--	--	--	--	--	--	--	--	--	--	--	--	--	--	0.12011	0.05939	0.12011	0.0549	0.12011	0.04285
--	--	--	--	--	--	--	--	--	--	--	--	--	--	0.11011	0.05391	0.11011	0.04992	0.1101	0.03908
--	--	--	--	--	--	--	--	--	--	--	--	--	--	0.1001	0.04844	0.1001	0.04498	0.1001	0.03509
--	--	--	--	--	--	--	--	--	--	--	--	--	--	0.0901	0.04311	0.0901	0.03987	0.0901	0.03176
--	--	--	--	--	--	--	--	--	--	--	--	--	--	0.0801	0.03783	0.0801	0.03512	0.0801	0.02798
--	--	--	--	--	--	--	--	--	--	--	--	--	--	0.0701	0.0327	0.0701	0.03041	0.0701	0.02432
--	--	--	--	--	--	--	--	--	--	--	--	--	--	0.0601	0.02772	0.0601	0.0258	0.0601	0.02039
--	--	--	--	--	--	--	--	--	--	--	--	--	--	0.0501	0.02287	0.0501	0.02128	0.0501	0.01663
--	--	--	--	--	--	--	--	--	--	--	--	--	--	0.0401	0.01797	0.0401	0.01682	0.0401	0.01344
--	--	--	--	--	--	--	--	--	--	--	--	--	--	0.0301	0.0133	0.0301	0.01242	0.03011	0.00986
--	--	--	--	--	--	--	--	--	--	--	--	--	--	0.02011	0.00868	0.02011	0.00805	0.0201	0.0064
--	--	--	--	--	--	--	--	--	--	--	--	--	--	0.0101	0.00412	0.0101	0.00378	0.0101	0.00298
--	--	--	--	--	--	--	--	--	--	--	--	--	--	8.07885e-05	-0.000507997	8.23947e-05	-0.00053256	8.31978e-05	-0.000456499
--	--	--	--	--	--	--	--	--	--	--	--	--	--	-0.00991	-0.00493	-0.00991	-0.00466	-0.00991	-0.00371
--	--	--	--	--	--	--	--	--	--	--	--	--	--	-0.01992	-0.00945	-0.01992	-0.00887	-0.01991	-0.007
--	--	--	--	--	--	--	--	--	--	--	--	--	--	-0.02992	-0.014	-0.02992	-0.01311	-0.02992	-0.01028
--	--	--	--	--	--	--	--	--	--	--	--	--	--	-0.03992	-0.01859	-0.03991	-0.01735	-0.03992	-0.01355
--	--	--	--	--	--	--	--	--	--	--	--	--	--	-0.04992	-0.02318	-0.04992	-0.02164	-0.04991	-0.017
--	--	--	--	--	--	--	--	--	--	--	--	--	--	-0.05992	-0.02788	-0.05992	-0.02595	-0.05992	-0.02044
--	--	--	--	--	--	--	--	--	--	--	--	--	--	-0.06991	-0.03269	-0.06991	-0.03029	-0.06991	-0.0239
--	--	--	--	--	--	--	--	--	--	--	--	--	--	-0.07991	-0.03749	-0.07991	-0.03466	-0.07991	-0.02719
--	--	--	--	--	--	--	--	--	--	--	--	--	--	-0.08991	-0.04265	-0.08991	-0.03897	-0.08991	-0.0305
--	--	--	--	--	--	--	--	--	--	--	--	--	--	-0.09992	-0.04767	-0.09992	-0.04343	-0.09992	-0.03373
--	--	--	--	--	--	--	--	--	--	--	--	--	--	-0.10992	-0.05293	-0.10992	-0.04807	-0.10992	-0.03746
--	--	--	--	--	--	--	--	--	--	--	--	--	--	-0.11992	-0.05832	-0.11992	-0.05286	-0.11992	-0.04043
--	--	--	--	--	--	--	--	--	--	--	--	--	--	-0.12992	-0.06366	-0.12992	-0.05765	-0.12992	-0.04396
--	--	--	--	--	--	--	--	--	--	--	--	--	--	-0.13993	-0.0692	-0.13993	-0.06233	-0.13992	-0.04735
--	--	--	--	--	--	--	--	--	--	--	--	--	--	-0.14992	-0.0751	-0.14992	-0.06745	-0.14992	-0.05082
--	--	--	--	--	--	--	--	--	--	--	--	--	--	-0.15992	-0.08087	-0.15992	-0.0726	-0.15992	-0.05424
--	--	--	--	--	--	--	--	--	--	--	--	--	--	-0.16992	-0.08704	-0.16992	-0.07797	-0.16992	-0.05807
--	--	--	--	--	--	--	--	--	--	--	--	--	--	-0.17992	-0.09318	-0.17992	-0.08293	-0.17991	-0.06169
--	--	--	--	--	--	--	--	--	--	--	--	--	--	-0.18991	-0.09979	-0.18991	-0.08837	-0.18991	-0.06534
--	--	--	--	--	--	--	--	--	--	--	--	--	--	-0.1999	-0.10656	-0.1999	-0.09403	-0.1999	-0.06883
--	--	--	--	--	--	--	--	--	--	--	--	--	--	-0.2099	-0.11312	-0.2099	-0.09975	-0.20989	-0.07308
--	--	--	--	--	--	--	--	--	--	--	--	--	--	-0.2199	-0.12022	-0.2199	-0.10516	-0.21989	-0.07647
--	--	--	--	--	--	--	--	--	--	--	--	--	--	-0.2299	-0.12767	-0.22989	-0.11146	-0.2299	-0.0797
--	--	--	--	--	--	--	--	--	--	--	--	--	--	-0.2399	-0.13496	-0.23989	-0.11741	-0.23989	-0.08402
--	--	--	--	--	--	--	--	--	--	--	--	--	--	-0.24989	-0.14212	-0.24989	-0.12351	-0.24988	-0.08815
--	--	--	--	--	--	--	--	--	--	--	--	--	--	-0.25991	-0.15056	-0.25992	-0.13015	-0.25992	-0.09162
--	--	--	--	--	--	--	--	--	--	--	--	--	--	-0.26991	-0.15862	-0.26992	-0.13626	-0.26992	-0.09748
--	--	--	--	--	--	--	--	--	--	--	--	--	--	-0.27991	-0.16596	-0.27992	-0.14288	-0.27992	-0.10219
--	--	--	--	--	--	--	--	--	--	--	--	--	--	-0.28991	-0.17511	-0.28991	-0.15032	-0.28992	-0.10688
--	--	--	--	--	--	--	--	--	--	--	--	--	--	-0.29991	-0.1836	-0.29991	-0.15689	-0.29992	-0.11151
--	--	--	--	--	--	--	--	--	--	--	--	--	--	-0.30992	-0.19179	-0.30992	-0.16453	-0.30992	-0.11644
--	--	--	--	--	--	--	--	--	--	--	--	--	--	-0.31992	-0.20115	-0.31992	-0.17131	-0.31993	-0.12022
--	--	--	--	--	--	--	--	--	--	--	--	--	--	-0.32992	-0.21009	-0.32992	-0.17863	-0.32993	-0.12396
--	--	--	--	--	--	--	--	--	--	--	--	--	--	-0.33991	-0.21942	-0.33991	-0.18656	-0.33991	-0.12748
--	--	--	--	--	--	--	--	--	--	--	--	--	--	-0.34991	-0.2293	-0.34991	-0.19428	-0.34992	-0.13264
--	--	--	--	--	--	--	--	--	--	--	--	--	--	-0.35991	-0.23926	-0.35991	-0.20188	-0.35992	-0.13804
--	--	--	--	--	--	--	--	--	--	--	--	--	--	-0.36991	-0.25038	-0.36991	-0.20994	-0.36993	-0.14287
--	--	--	--	--	--	--	--	--	--	--	--	--	--	-0.37992	-0.26114	-0.37992	-0.21768	-0.37992	-0.14743
--	--	--	--	--	--	--	--	--	--	--	--	--	--	-0.38992	-0.27088	-0.38992	-0.22603	-0.38992	-0.15278
--	--	--	--	--	--	--	--	--	--	--	--	--	--	-0.39992	-0.28214	-0.39992	-0.2346	-0.39992	-0.15757
--	--	--	--	--	--	--	--	--	--	--	--	--	--	-0.40992	-0.29306	-0.40992	-0.24267	-0.40992	-0.15944
--	--	--	--	--	--	--	--	--	--	--	--	--	--	-0.41992	-0.30521	-0.41992	-0.25144	-0.41992	-0.16591
--	--	--	--	--	--	--	--	--	--	--	--	--	--	-0.42992	-0.31708	-0.42992	-0.26118	-0.42991	-0.16942
--	--	--	--	--	--	--	--	--	--	--	--	--	--	-0.43992	-0.33049	-0.43992	-0.27096	-0.43991	-0.17382
--	--	--	--	--	--	--	--	--	--	--	--	--	--	-0.44992	-0.3433	-0.44991	-0.2801	-0.44991	-0.1775
--	--	--	--	--	--	--	--	--	--	--	--	--	--	-0.45991	-0.35464	-0.45991	-0.28955	-0.45991	-0.18568
--	--	--	--	--	--	--	--	--	--	--	--	--	--	-0.46991	-0.36738	-0.46991	-0.30039	-0.46991	-0.18934
--	--	--	--	--	--	--	--	--	--	--	--	--	--	-0.4799	-0.38133	-0.4799	-0.31054	-0.4799	-0.19896
--	--	--	--	--	--	--	--	--	--	--	--	--	--	-0.4899	-0.39627	-0.48989	-0.32095	-0.48989	-0.20411
--	--	--	--	--	--	--	--	--	--	--	--	--	--	-0.49989	-0.40995	-0.49989	-0.33142	-0.49989	-0.21103
--	--	--	--	--	--	--	--	--	--	--	--	--	--	-0.50989	-0.42337	-0.50989	-0.34268	-0.50989	-0.21679
--	--	--	--	--	--	--	--	--	--	--	--	--	--	-0.51989	-0.43801	-0.51989	-0.35484	-0.51989	-0.22446
--	--	--	--	--	--	--	--	--	--	--	--	--	--	-0.52989	-0.45245	-0.52989	-0.3661	-0.52989	-0.22074
--	--	--	--	--	--	--	--	--	--	--	--	--	--	-0.53988	-0.46775	-0.53988	-0.37752	-0.53988	-0.23034
--	--	--	--	--	--	--	--	--	--	--	--	--	--	-0.54989	-0.48511	-0.54988	-0.39058	-0.54988	-0.23671
--	--	--	--	--	--	--	--	--	--	--	--	--	--	-0.55989	-0.49908	-0.55989	-0.4021	-0.55989	-0.24292
--	--	--	--	--	--	--	--	--	--	--	--	--	--	-0.56989	-0.52061	-0.56989	-0.41406	-0.56989	-0.24987
--	--	--	--	--	--	--	--	--	--	--	--	--	--	-0.57989	-0.53394	-0.57989	-0.4276	-0.57989	-0.25789
--	--	--	--	--	--	--	--	--	--	--	--	--	--	-0.5899	-0.55278	-0.58989	-0.43955	-0.58989	-0.26246
--	--	--	--	--	--	--	--	--	--	--	--	--	--	-0.5999	-0.56859	-0.5999	-0.4541	-0.59989	-0.26599

## Sheet: DC galvanostatic curves, dark
	3D		2D-3D passivation		2D-3D segregation		2D
1.455	0.0014			1.453	0.000246733	1.453	-1.52588e-06
2.416	0.00149	2.41	0.00587	2.412	0.000237179	2.409	-1.52588e-06
3.378	0.00149	3.372	0.00725	3.368	0.000258148	3.367	-7.75099e-05
4.336	0.00149	4.33	0.00523	4.326	0.000237894	4.323	-1.52588e-06
5.296	0.00138	5.285	0.00481	5.282	0.000249539	5.279	-0.000578976
6.254	0.00142	6.245	0.00547	6.239	0.000255369	6.238	1.04427e-05
7.211	0.00143	7.2	0.00507	7.195	0.00024492	7.199	-0.000304031
8.17	0.00138	8.157	0.00484	8.155	0.000246666	8.154	6.64234e-05
9.125	0.00148	9.112	0.0052	9.111	0.000243401	9.113	-0.000106931
10.083	0.00152	10.07	0.00494	10.068	0.000240241	10.071	-4.17709e-05
11.038	0.0014	11.028	0.00527	11.026	0.000311682	11.028	-4.10795e-05
11.994	0.00149	11.985	0.00435	11.985	0.000242501	11.985	-2.80619e-05
12.951	0.00149	12.946	0.00506	12.943	0.000277437	12.944	-4.44174e-05
13.908	0.00149	13.902	0.00465	13.903	0.000288162	13.901	-2.4581e-05
14.865	0.00138	14.858	0.00485	14.858	0.000225386	14.859	-2.985e-05
15.821	0.00142	15.815	0.00441	15.814	0.000292816	15.816	-4.31299e-05
16.812	0.00143	16.804	0.005	16.807	0.000244557	16.805	-5.92947e-05
17.77	0.00138	17.764	0.00464	17.765	0.000260708	17.763	-3.68595e-05
18.726	0.00152	18.72	0.00469	18.722	0.000243177	18.72	-3.06129e-05
19.686	0.0014	19.678	0.00473	19.678	0.000234312	19.679	-3.79801e-05
20.644	0.00149	20.634	0.00431	20.638	0.000274258	20.635	-3.47614e-05
21.602	0.00149	21.594	0.00487	21.598	0.000246733	21.594	-3.91483e-05
22.558	0.00149	22.55	0.00458	22.557	0.000237179	22.55	-8.1706e-05
23.517	0.00138	23.506	0.0049	23.514	0.000258148	23.511	-3.29971e-05
24.474	0.00142	24.464	0.00449	24.472	0.000237894	24.469	-4.704e-05
25.431	0.00143	25.422	0.00481	25.429	0.000249539	25.427	-3.84808e-05
26.389	0.00138	26.378	0.00431	26.384	0.000255369	26.387	-2.62022e-05
27.344	0.00152	27.334	0.00458	27.34	0.00024492	27.345	-3.42131e-05
28.3	0.0014	28.29	0.0049	28.3	0.000246666	28.302	-5.07355e-05
29.256	0.00149	29.248	0.00459	29.257	0.000243401	29.259	-5.69344e-05
30.216	0.00149	30.204	0.00451	30.214	0.000240241	30.216	-5.44548e-05
31.172	0.00149	31.162	0.00438	31.173	0.000311682	31.173	-5.26667e-05
32.16	0.00138	32.153	0.00413	32.164	0.000242501	32.163	-4.25339e-05
33.118	0.00142	33.108	0.00419	33.12	0.000277437	33.125	-3.19242e-05
34.074	0.00143	34.065	0.00441	34.076	0.000288162	34.081	-3.77655e-05
35.035	0.00138	35.022	0.00449	35.036	0.000225386	35.037	-3.08275e-05
35.993	0.00112	35.982	0.00437	35.992	0.000292816	35.996	-5.05686e-05
36.948	0.00112	36.94	0.00433	36.95	0.000244557	36.955	-2.71797e-05
37.905	0.00109	37.898	0.0041	37.945	0.000260708	37.912	-4.62294e-05
38.862	0.00108	38.855	0.0045	38.904	0.000243177	38.87	-5.55277e-05
39.82	0.00112	39.812	0.00421	39.86	0.000234312	39.827	-4.39167e-05
40.777	0.00109	40.77	0.00456	40.818	0.000274258	40.783	-1.88351e-05
41.736	0.00112	41.73	0.00434	41.774	0.000246733	41.739	-4.10795e-05
42.697	0.00106	42.686	0.00443	42.731	0.000237179	42.7	-4.02689e-05
43.656	0.00115	43.646	0.00411	43.688	0.000258148	43.657	-6.72817e-05
44.614	0.00108	44.603	0.00407	44.648	0.000237894	44.614	-4.29869e-05
45.57	0.00112	45.562	0.00444	45.607	0.000249539	45.573	-6.26802e-05
46.525	0.00108	46.522	0.00397	46.562	0.000255369	46.53	-2.74658e-05
47.516	0.00117	47.512	0.00422	47.552	0.00024492	47.52	-3.55959e-05
48.474	0.00113	48.47	0.00393	48.511	0.000246666	48.479	-3.17097e-05
49.435	0.00119	49.427	0.00472	49.473	0.000243401	49.436	-2.95401e-05
50.392	0.00106	50.385	0.00416	50.428	0.000240241	50.393	-6.21557e-05
51.35	0.00107	51.343	0.00394	51.386	0.000311682	51.349	-4.28677e-05
52.322	0.00138	52.302	0.00371	52.342	0.000242501	52.309	-3.1209e-05
53.28	0.00152	53.264	0.00424	53.301	0.000277437	53.267	-2.4271e-05
54.242	0.0014	54.224	0.00363	54.26	0.000288162	54.223	-5.28574e-05
55.198	0.00149	55.18	0.0041	55.218	0.000225386	55.179	-4.05788e-05
56.156	0.00149	56.138	0.00411	56.174	0.000292816	56.139	-3.41177e-05
57.114	0.00149	57.094	0.00446	57.132	0.000244557	57.096	-4.68731e-05
58.071	0.00138	58.052	0.00367	58.089	0.000260708	58.053	-5.60045e-05
59.028	0.00142	59.011	0.00365	59.049	0.000243177	59.013	-4.76599e-05
59.986	0.00143	59.968	0.00392	60.005	0.000234312	59.969	-3.24965e-05
60.945	0.00138	60.927	0.00393	60.964	0.000274258	60.929	-2.26974e-05
61.902	0.00112	61.884	0.004	61.92	0.000246733	61.89	-4.00543e-05
62.893	0.00112	62.875	0.00383	62.914	0.000237179	62.879	-3.70979e-05
63.848	0.00109	63.829	0.00383	63.873	0.000258148	63.837	-3.23534e-05
64.805	0.00108	64.784	0.0039	64.83	0.000237894	64.797	-6.78778e-05
65.766	0.00138	65.74	0.00368	65.788	0.000249539	65.756	-3.46422e-05
66.725	0.00142	66.697	0.00363	66.746	0.000255369	66.711	-3.30448e-05
67.681	0.00143	67.655	0.00385	67.702	0.00024492	67.669	-5.44071e-05
68.643	0.00138	68.613	0.00387	68.659	0.000246666	68.625	-4.79698e-05
69.6	0.00152	69.568	0.00388	69.619	0.000243401	69.586	-2.7585e-05
70.555	0.0014	70.522	0.00361	70.58	0.000240241	70.543	-3.40223e-05
71.512	0.00149	71.483	0.00332	71.537	0.000311682	71.501	-6.33478e-05
72.469	0.00149	72.44	0.00372	72.495	0.000242501	72.459	-4.40359e-05
73.428	0.00149	73.398	0.00362	73.452	0.000277437	73.413	-5.75066e-05
74.382	0.00138	74.354	0.00349	74.408	0.000288162	74.37	-3.13282e-05
75.338	0.00142	75.312	0.00338	75.365	0.000225386	75.328	-3.7694e-05
76.296	0.00143	76.272	0.00411	76.323	0.000292816	76.285	-3.55721e-05
77.252	0.00138	77.227	0.0035	77.28	0.000244557	77.241	-2.25067e-05
78.242	0.00152	78.218	0.00338	78.27	0.000260708	78.233	-4.82082e-05
79.199	0.0014	79.175	0.00373	79.226	0.000243177	79.19	-6.10828e-05
80.155	0.00149	80.133	0.0035	80.182	0.000234312	80.146	-6.07252e-05
81.114	0.00149	81.088	0.00376	81.138	0.000274258	81.102	-2.44617e-05
82.072	0.00149	82.048	0.0032	82.094	0.000246733	82.063	-6.02961e-05
83.031	0.00138	83.005	0.00335	83.05	0.000237179	83.022	-4.50373e-05
83.988	0.00142	83.962	0.00317	84.008	0.000258148	83.977	-4.54426e-05
84.948	0.00143	84.918	0.00374	84.962	0.000237894	84.935	-3.90291e-05
85.909	0.00138	85.874	0.00355	85.921	0.000249539	85.891	-6.09398e-05
86.865	0.00112	86.832	0.0031	86.877	0.000255369	86.849	-5.97239e-05
87.822	0.00112	87.788	0.00361	87.832	0.00024492	87.807	-3.54052e-05
88.779	0.00109	88.745	0.00317	88.788	0.000246666	88.767	-3.44753e-05
89.738	0.00108	89.703	0.00373	89.748	0.000243401	89.725	-8.46624e-05
90.696	0.00112	90.662	0.00287	90.705	0.000240241	90.683	-3.87907e-05
91.652	0.00109	91.617	0.00355	91.661	0.000311682	91.645	-3.50714e-05
92.608	0.00112	92.574	0.00328	92.617	0.000242501	92.603	-3.93629e-05
93.599	0.00106	93.564	0.0035	93.606	0.000277437	93.598	-4.60863e-05
94.556	0.00115	94.521	0.00318	94.562	0.000288162	94.553	-2.7585e-05
95.513	0.00108	95.477	0.00282	95.519	0.000225386	95.513	-7.57217e-05
96.469	0.00112	96.432	0.0035	96.476	0.000292816	96.506	-3.9196e-05
97.431	0.00108	97.388	0.00343	97.432	0.000244557	97.461	-4.92334e-05
98.388	0.00117	98.345	0.00317	98.388	0.000260708	98.42	-2.98738e-05
99.348	0.00113	99.3	0.00318	99.344	0.000243177	99.376	-4.25339e-05
100.303	0.00119	100.258	0.0029	100.302	0.000234312	100.334	2.12193e-06
101.264	0.00106	101.215	0.00318	101.259	0.000274258	101.291	-6.20842e-05
102.224	0.00107	102.173	0.00306	102.216	0.000246733	102.253	-5.40495e-05
103.18	0.00109	103.13	0.00311	103.17	0.000237179	103.214	-1.88351e-05
104.138	0.00112	104.087	0.00297	104.128	0.000258148	104.171	-6.63996e-05
105.096	0.00106	105.046	0.00299	105.084	0.000237894	105.127	-4.81606e-05
106.056	0.00115	106.002	0.00324	106.04	0.000249539	106.087	-5.06639e-05
107.016	0.00108	106.957	0.00276	107	0.000255369	107.044	-7.36713e-06
107.975	0.00112	107.914	0.00315	107.958	0.00024492	108.007	-7.14064e-05
108.965	0.00108	108.905	0.00314	108.949	0.000246666	109.001	-5.30005e-05
109.921	0.00117	109.862	0.00329	109.905	0.000243401	109.958	-1.00851e-05
110.878	0.00113	110.817	0.00323	110.865	0.000240241	110.916	-3.34263e-05
111.84	0.00119	111.776	0.00298	111.821	0.000311682	111.873	-5.41449e-05
112.796	0.00106	112.733	0.00273	112.776	0.000242501	112.833	-0.000124979
113.754	0.00107	113.688	0.00285	113.731	0.000277437	113.789	-4.77314e-05
114.713	0.00138	114.644	0.00304	114.687	0.000288162	114.749	-8.14438e-05
115.672	0.00145	115.603	0.0029	115.642	0.000225386	115.707	-3.38316e-05
116.629	0.0014	116.56	0.00278	116.599	0.000292816	116.665	-7.18832e-05
117.588	0.00149	117.517	0.00285	117.556	0.000244557	117.621	-1.27077e-05
118.545	0.00149	118.472	0.00295	118.512	0.000260708	118.577	-3.17335e-05
119.502	0.00149	119.429	0.0033	119.472	0.000243177	119.536	-3.83854e-05
120.458	0.00138	120.386	0.00296	120.426	0.000234312	120.496	-0.000101089
121.417	0.00142	121.342	0.00276	121.383	0.000274258	121.453	1.7643e-06
122.372	0.00143	122.302	0.00284	122.344	0.000246733	122.41	-7.62224e-05
123.328	0.00138	123.257	0.00275	123.3	0.000237179	123.366	-3.08514e-05
124.322	0.00112	124.25	0.00271	124.291	0.000258148	124.359	-9.38892e-05
125.282	0.00112	125.205	0.00262	125.248	0.000237894	125.315	-1.94788e-05
126.24	0.00109	126.162	0.00338	126.203	0.000249539	126.276	-7.12872e-05
127.201	0.00108	127.118	0.00272	127.158	0.000255369	127.233	-7.43866e-06
128.156	0.00138	128.075	0.00267	128.114	0.00024492	128.189	-8.52823e-05
129.117	0.00142	129.031	0.00282	129.072	0.000246666	129.148	-6.77109e-06
130.072	0.00143	129.988	0.00259	130.028	0.000243401	130.106	-8.64744e-05
131.028	0.00138	130.944	0.00321	130.986	0.000240241	131.061	-3.41892e-05
131.985	0.00135	131.9	0.0027	131.94	0.000311682	132.017	-4.73022e-05
132.94	0.0014	132.857	0.00266	132.897	0.000242501	132.977	-2.67506e-05
133.897	0.00149	133.818	0.00249	133.855	0.000277437	133.933	-4.90904e-05
134.855	0.00149	134.777	0.00294	134.809	0.000288162	134.893	-1.57356e-06
135.81	0.00149	135.732	0.00272	135.765	0.000225386	135.853	-6.11067e-05
136.768	0.00138	136.69	0.00269	136.722	0.000292816	136.811	-6.34193e-06
137.723	0.00142	137.647	0.00263	137.676	0.000244557	137.768	-6.845e-05
138.681	0.00143	138.603	0.00256	138.632	0.000260708	138.724	-2.07186e-05
139.671	0.00138	139.592	0.00291	139.622	0.000243177	139.717	-8.23498e-05
140.628	0.00125	140.548	0.00244	140.578	0.000234312	140.674	-1.53542e-05
141.588	0.00109	141.504	0.00275	141.534	0.000274258	141.636	-5.9247e-05
142.546	0.00112	142.463	0.00255	142.49	0.000246733	142.593	-1.89304e-05
143.503	0.00106	143.42	0.00277	143.446	0.000237179	143.553	-3.37362e-05
144.458	0.00115	144.378	0.00269	144.404	0.000258148	144.509	-3.99828e-05
145.414	0.00108	145.334	0.00219	145.36	0.000237894	145.469	-7.62939e-06
146.37	0.00112	146.29	0.00268	146.316	0.000249539	146.432	-7.46012e-05
147.327	0.00108	147.248	0.00252	147.275	0.000255369	147.388	-2.32458e-05
148.284	0.00117	148.205	0.00275	148.23	0.00024492	148.349	-3.0756e-05
149.238	0.00113	149.162	0.00275	149.185	0.000246666	149.308	-6.45876e-05
150.196	0.00119	150.118	0.0027	150.141	0.000243401	150.263	-7.22647e-05
151.153	0.00106	151.076	0.00259	151.1	0.000240241	151.219	-3.55721e-05
152.114	0.00107	152.038	0.00245	152.059	0.000311682	152.176	-8.98838e-05
153.071	0.00138	152.994	0.00221	153.014	0.000242501	153.135	-4.29153e-07
154.027	0.00115	153.955	0.00243	153.97	0.000277437	154.091	-7.66039e-05
155.018	0.0014	154.947	0.00205	154.958	0.000288162	155.086	-5.60284e-06
155.978	0.00149	155.904	0.00278	155.919	0.000225386	156.044	-5.43118e-05
156.935	0.00149	156.86	0.00236	156.877	0.000292816	157	-4.84705e-05
157.892	0.00149	157.82	0.00266	157.833	0.000244557	157.959	-3.6478e-05
158.849	0.00138	158.777	0.00216	158.788	0.000260708	158.915	-4.40598e-05
159.805	0.00142	159.734	0.00264	159.742	0.000243177	159.872	-7.86305e-05
160.761	0.00143	160.69	0.00239	160.698	0.000234312	160.83	-8.7738e-06
161.718	0.00138	161.646	0.00239	161.654	0.000274258	161.787	-5.58615e-05
162.674	0.00112	162.602	0.0026	162.608	0.000246733	162.743	-3.3474e-05
163.631	0.00112	163.559	0.00213	163.564	0.000237179	163.701	-5.43594e-05
164.586	0.00109	164.515	0.00223	164.521	0.000258148	164.657	-6.02484e-05
165.544	0.00108	165.476	0.00214	165.482	0.000237894	165.613	-5.16176e-05
166.501	0.00138	166.432	0.00234	166.438	0.000249539	166.571	-6.61135e-05
167.464	0.00142	167.39	0.00241	167.396	0.000255369	167.531	-3.31163e-05
168.425	0.00143	168.345	0.00245	168.355	0.00024492	168.489	-3.6931e-05
169.382	0.00138	169.302	0.0024	169.311	0.000246666	169.447	-2.67029e-05
170.373	0.00125	170.293	0.00193	170.3	0.000243401	170.438	-5.01633e-05
171.331	0.0014	171.25	0.00217	171.256	0.000240241	171.396	-5.49793e-05
172.286	0.00149	172.207	0.00249	172.216	0.000311682	172.354	-7.8392e-05
173.242	0.00149	173.162	0.00233	173.172	0.000242501	173.31	-4.52042e-05
174.202	0.00149	174.118	0.0021	174.13	0.000277437	174.268	-9.52005e-05
175.158	0.00138	175.115	0.00215	175.087	0.000288162	175.23	-3.71218e-05
176.116	0.00142	176.075	0.00246	176.048	0.000225386	176.191	-3.50952e-05
177.074	0.00143	177.03	0.00181	177.006	0.000292816	177.153	-5.44548e-05
178.03	0.00138	177.988	0.00183	177.962	0.000244557	178.114	-6.69241e-05
178.992	0.00115	178.946	0.00225	178.918	0.000260708	179.075	-3.20911e-05
179.952	0.00109	179.904	0.0022	179.875	0.000243177	180.033	-3.7694e-05
180.91	0.00112	180.859	0.00232	180.83	0.000234312	180.991	-1.59264e-05
181.868	0.00106	181.816	0.00165	181.785	0.000274258	181.947	-5.4574e-05
182.827	0.00115	182.772	0.00242	182.742	0.000246733	182.906	-4.00782e-05
183.784	0.00108	183.732	0.0019	183.698	0.000237179	183.866	-6.61135e-05
184.743	0.00112	184.692	0.00219	184.653	0.000258148	184.823	-1.03474e-05
185.734	0.00108	185.682	0.00174	185.642	0.000237894	185.813	-7.73668e-05
186.692	0.00117	186.638	0.00245	186.6	0.000249539	186.771	-1.40667e-05
187.651	0.00113	187.595	0.00213	187.556	0.000255369	187.73	-4.15802e-05
188.607	0.00119	188.554	0.00226	188.515	0.00024492	188.688	-1.00613e-05
189.566	0.00106	189.516	0.002	189.471	0.000246666	189.646	-5.53608e-05
190.526	0.00107	190.472	0.00241	190.43	0.000243401	190.603	-2.3222e-05
191.483	0.00138	191.43	0.00196	191.387	0.000240241	191.561	-6.30617e-05
192.439	0.00115	192.387	0.00225	192.345	0.000311682	192.522	-4.18663e-05
193.398	0.0014	193.345	0.00193	193.3	0.000242501	193.479	-4.59433e-05
194.358	0.00149	194.304	0.00211	194.263	0.000277437	194.441	-7.23362e-05
195.316	0.00149	195.263	0.00194	195.219	0.000288162	195.397	-2.82049e-05
196.273	0.00149	196.223	0.00198	196.176	0.000225386	196.356	-4.45127e-05
197.234	0.00138	197.18	0.00222	197.136	0.000292816	197.314	-3.34501e-05
198.192	0.00142	198.138	0.00242	198.092	0.000244557	198.271	-6.36578e-05
199.152	0.00143	199.095	0.00186	199.052	0.000260708	199.231	-2.24352e-05
200.112	0.00138	200.052	0.00204	200.008	0.000243177	200.193	-4.22239e-05
201.102	0.00112	201.045	0.00168	201.002	0.000234312	201.19	-4.62532e-05
202.061	0.00112	202.004	0.00239	201.961	0.000274258	202.147	-1.93357e-05
203.023	0.00109	202.961	0.00193	202.917	0.000246733	203.107	-5.55754e-05
203.981	0.00108	203.917	0.00224	203.872	0.000237179	204.069	-5.94139e-05
204.942	0.00138	204.875	0.00197	204.83	0.000258148	205.03	-2.71082e-05
205.898	0.00142	205.83	0.00203	205.787	0.000237894	205.987	-8.76665e-05
206.857	0.00143	206.788	0.00183	206.744	0.000249539	206.946	-6.22511e-05
207.816	0.00138	207.745	0.00189	207.702	0.000255369	207.908	-5.55754e-05
208.778	0.00125	208.703	0.00205	208.66	0.00024492	208.869	-5.84841e-05
209.739	0.0014	209.66	0.00192	209.616	0.000246666	209.828	-2.82764e-05
210.695	0.00149	210.619	0.00208	210.571	0.000243401	210.785	-4.92096e-05
211.652	0.00149	211.58	0.00184	211.53	0.000240241	211.747	-3.6335e-05
212.615	0.00149	212.54	0.00179	212.487	0.000311682	212.705	-5.41449e-05
213.572	0.00138	213.498	0.00198	213.447	0.000242501	213.666	-3.65257e-05
214.528	0.00142	214.455	0.00178	214.402	0.000277437	214.622	-6.42061e-05
215.49	0.00143	215.412	0.00185	215.36	0.000288162	215.579	-5.45979e-05
216.481	0.00138	216.404	0.00187	216.35	0.000225386	216.572	-4.88281e-05
217.438	0.00115	217.364	0.00176	217.311	0.000292816	217.533	-6.80208e-05
218.394	0.00112	218.322	0.00167	218.268	0.000244557	218.49	-5.28097e-05
219.354	0.00112	219.282	0.0019	219.225	0.000260708	219.448	-6.26087e-05
220.315	0.00109	220.24	0.00194	220.182	0.000243177	220.41	-3.99351e-05
221.275	0.00108	221.198	0.00171	221.138	0.000234312	221.367	-6.42538e-05
222.232	0.00138	222.155	0.00169	222.095	0.000274258	222.327	-2.05278e-05
223.189	0.00142	223.115	0.00159	223.052	0.000246733	223.283	-5.55277e-05
224.145	0.00143	224.076	0.00187	224.008	0.000237179	224.242	-4.11034e-05
225.102	0.00138	225.032	0.00177	224.964	0.000258148	225.199	-6.04868e-05
226.062	0.00125	225.99	0.00179	225.92	0.000237894	226.156	-1.9455e-05
227.02	0.0014	226.946	0.00205	226.877	0.000249539	227.116	-7.00712e-05
227.976	0.00149	227.905	0.00189	227.835	0.000255369	228.076	-2.55346e-05
228.934	0.00149	228.862	0.00139	228.79	0.00024492	229.034	-7.16686e-05
229.89	0.00149	229.82	0.00166	229.75	0.000246666	229.996	-5.9104e-05
230.848	0.00138	230.777	0.00207	230.706	0.000243401	230.954	-2.39849e-05
231.84	0.00142	231.766	0.00197	231.696	0.000240241	231.943	-4.73499e-05
232.798	0.00143	232.725	0.00152	232.653	0.000311682	232.906	5.26905e-06
233.757	0.00138	233.685	0.00155	233.609	0.000242501	233.861	-5.90801e-05
234.718	0.00115	234.644	0.00149	234.565	0.000277437	234.818	-4.77314e-05
235.675	0.00109	235.603	0.00134	235.522	0.000288162	235.776	-5.22852e-05
236.631	0.00112	236.559	0.00134	236.48	0.000225386	236.732	-5.00441e-05
237.588	0.00106	237.515	0.00137	237.436	0.000292816	237.689	-2.985e-05
238.548	0.00115	238.47	0.00139	238.392	0.000244557	238.647	-4.09126e-05
239.508	0.00108	239.425	0.00192	239.347	0.000260708	239.602	-1.54495e-05
240.466	0.00112	240.382	0.00151	240.302	0.000243177	240.566	-2.89202e-05
241.424	0.00108	241.337	0.00132	241.258	0.000234312	241.524	-5.85079e-05
242.38	0.00117	242.298	0.00167	242.215	0.000274258	242.485	-1.12534e-05
243.338	0.00113	243.254	0.0015	243.173	0.000347024	243.445	-6.08206e-05
244.295	0.00119	244.21	0.00174	244.132	0.000384454	244.401	-5.89132e-05
245.256	0.00106	245.167	0.0015	245.087	0.000363105	245.363	-4.6587e-05
246.213	0.00107	246.126	0.00158	246.043	0.00032385	246.319	-5.05209e-05
247.205	0.00138	247.117	0.00149	247.032	0.000378225	247.311	-7.56979e-05
248.162	0.00115	248.075	0.00178	247.996	0.000324829	248.27	-3.17812e-05
249.118	0.0014	249.032	0.00175	248.953	0.000320069	249.229	-1.28031e-05
250.074	0.00149	249.994	0.00191	249.908	0.00030812	250.186	-5.95093e-05
251.03	0.00149	250.952	0.00153	250.865	0.00035466	251.147	-1.62125e-05
251.987	0.00149	251.908	0.00146	251.82	0.000321211	252.107	-4.59194e-05
252.942	0.00138	252.864	0.00144	252.777	0.000332152	253.063	-2.75373e-05
253.898	0.00142	253.822	0.00111	253.732	0.000316102	254.022	-7.4172e-05
254.856	0.00143	254.779	0.00124	254.687	0.000274853	254.981	-4.92096e-05
255.814	0.00138	255.736	0.00144	255.642	0.000281104	255.941	-6.06537e-05
256.771	0.00112	256.692	0.00137	256.598	0.000339849	256.903	-7.5841e-05
257.729	0.00112	257.65	0.00126	257.554	0.000302695	257.859	-4.2367e-05
258.691	0.00109	258.608	0.00116	258.508	0.000303851	258.819	-3.95775e-05
259.648	0.00112	259.563	0.00162	259.47	0.000354466	259.779	-5.52893e-05
260.605	0.00112	260.522	0.00125	260.43	0.00031189	260.734	-3.88622e-05
261.567	0.00109	261.48	0.00146	261.387	0.000286431	261.696	-1.96695e-05
262.561	0.00108	262.47	0.00125	262.376	0.000306805	262.689	-4.80413e-05
263.518	0.00138	263.426	0.00124	263.33	0.000324961	263.646	-3.14474e-05
264.476	0.00142	264.382	0.00159	264.287	0.000308302	264.605	-7.56741e-05
265.436	0.00143	265.34	0.0017	265.245	0.000260137	265.562	-5.31673e-05
266.392	0.00138	266.298	0.0012	266.2	0.000308788	266.519	-7.09772e-05
267.352	0.00125	267.258	0.00118	267.157	0.000271828	267.476	-3.7241e-05
268.307	0.0014	268.213	0.00157	268.112	0.000273079	268.434	-5.75781e-05
269.268	0.00149	269.17	0.00152	269.068	0.000288624	269.392	-2.91348e-05
270.226	0.00149	270.128	0.00123	270.026	0.00029196	270.352	-4.58479e-05
271.183	0.00149	271.086	0.0011	270.983	0.0002845	271.311	-3.79086e-05
272.143	0.00138	272.043	0.00117	271.939	0.000266446	272.273	-4.53949e-05
273.1	0.00142	273	0.00133	272.896	0.000279086	273.235	-5.14746e-05
274.056	0.00143	273.957	0.00134	273.852	0.000136232	274.191	-4.16994e-05
275.012	0.00138	274.912	0.00154	274.808	0.000274177	275.149	-7.5531e-05
275.968	0.00115	275.87	0.00139	275.762	0.000246733	276.106	-4.79937e-05
276.926	0.00109	276.83	0.00119	276.718	0.000237179	277.063	-4.16994e-05
277.92	0.00112	277.82	0.00127	277.708	0.000258148	278.053	-3.42846e-05
278.876	0.00106	278.778	0.00142	278.664	0.000237894	279.009	-5.42641e-05
279.832	0.00115	279.735	0.00161	279.62	0.000249539	279.969	-4.8399e-05
280.789	0.00108	280.692	0.00146	280.579	0.000255369	280.925	-3.0899e-05
281.745	0.00112	281.654	0.00153	281.534	0.00024492	281.883	-8.51631e-05
282.704	0.00108	282.61	0.000905623	282.49	0.000246666	282.846	-8.1563e-05
283.661	0.00117	283.568	0.00128	283.448	0.000243401	283.803	-5.55992e-05
284.621	0.00113	284.524	0.00126	284.405	0.000240241	284.763	-5.58138e-05
285.58	0.00119	285.48	0.000951846	285.362	0.000311682	285.721	-2.48909e-05
286.538	0.00106	286.437	0.00128	286.323	0.000242501	286.679	-6.02484e-05
287.498	0.00107	287.396	0.00142	287.281	0.000277437	287.636	-1.88589e-05
288.492	0.00138	288.353	0.00137	288.241	0.000288162	288.593	-1.38283e-05
289.449	0.00115	289.308	0.00117	289.201	0.000225386	289.55	-5.64814e-05
290.406	0.0014	290.267	0.0015	290.16	0.000292816	290.507	-4.673e-05
291.364	0.00149	291.225	0.000538369	291.117	0.000244557	291.463	-5.07116e-05
292.324	0.00149	292.181	0.00128	292.072	0.000260708	292.424	-6.48022e-05
293.315	0.00149	293.174	0.00090431	293.062	0.000243177	293.419	-2.21729e-05
294.273	0.00138	294.13	0.00132	294.02	0.000234312	294.38	-7.08342e-05
295.231	0.00142	295.087	0.00142	294.976	0.000274258	295.336	-8.86917e-06
296.188	0.00143	296.045	0.00131	295.932	0.000244703	296.293	-3.79562e-05
297.148	0.00138	297.004	0.00101	296.888	0.000244749	297.248	-3.7384e-05
298.105	0.00112	297.962	0.000816519	297.847	0.000211879	298.206	-7.58171e-05
299.062	0.00112	298.92	0.00121	298.802	0.00024713	299.166	-2.58684e-05
300.019	0.00109	299.875	0.00104	299.759	0.00025267	300.126	-8.2922e-05
300.977	0.02431	300.83	0.0015	300.718	0.000245	301.083	-4.54903e-05
301.934	0.03059	301.788	0.00113	301.677	0.00027883	302.056	0.000730443
302.89	0.03244	302.055	0.07692	301.942	0.00366	303.016	0.000754356
303.846	0.03363	302.204	0.07642	302.088	0.00437	303.973	0.000727367
304.806	0.03447	302.35	0.07644	302.237	0.00457	304.929	0.000755525
305.764	0.03512	302.497	0.07635	302.384	0.00477	305.886	0.000758672
306.725	0.03568	302.644	0.07636	302.536	0.0048	306.843	0.000744152
307.682	0.03627	302.792	0.07662	302.682	0.00492	307.802	0.000751448
308.676	0.03656	302.942	0.07667	302.827	0.00499	308.794	0.000764489
309.634	0.03688	303.088	0.07657	302.972	0.00504	309.753	0.000731373
310.59	0.03716	303.238	0.07678	303.12	0.00508	310.713	0.000732279
311.548	0.03746	303.385	0.07675	303.266	0.00513	311.673	0.000723886
312.506	0.03805	303.532	0.07652	303.412	0.00519	312.633	0.000724769
313.472	0.03798	303.678	0.07687	303.558	0.00519	313.591	0.000736213
314.434	0.03818	303.825	0.07668	303.706	0.00524	314.553	0.000717616
315.39	0.03836	303.972	0.07719	303.852	0.00525	315.513	0.000759768
316.346	0.03855	304.126	0.07686	304	0.0053	316.473	0.000744677
317.304	0.03851	304.278	0.07678	304.148	0.00531	317.431	0.000760245
318.261	0.03885	304.43	0.07673	304.294	0.00535	318.39	0.000764585
319.218	0.03891	304.578	0.07672	304.44	0.00537	319.348	0.000756836
320.176	0.03904	304.73	0.07706	304.588	0.00537	320.309	0.00077827
321.134	0.03941	304.878	0.07698	304.735	0.00542	321.27	0.000746155
322.092	0.03938	305.027	0.07702	304.882	0.00544	322.229	0.00076201
323.048	0.03948	305.177	0.07707	305.029	0.00547	323.19	0.000785303
324.043	0.03948	305.325	0.07709	305.182	0.00548	324.182	0.000720644
325.001	0.03966	305.474	0.07725	305.33	0.00551	325.14	0.000752449
325.958	0.03972	305.622	0.07738	305.477	0.00551	326.097	0.000722933
326.915	0.03983	305.77	0.07723	305.627	0.00557	327.056	0.000757337
327.873	0.03991	305.917	0.07698	305.773	0.00555	328.014	0.000747251
328.834	0.03993	306.068	0.07694	305.919	0.00555	328.972	0.000778341
329.794	0.04006	306.218	0.07746	306.067	0.00557	329.933	0.000743604
330.756	0.04011	306.364	0.07722	306.216	0.00561	330.891	0.000778413
331.718	0.04018	306.512	0.07712	306.363	0.00559	331.852	0.000758171
332.678	0.04023	306.659	0.07762	306.509	0.00561	332.811	0.000749302
333.642	0.04033	306.81	0.07725	306.657	0.00563	333.773	0.000761247
334.603	0.04039	306.957	0.07779	306.805	0.00564	334.737	0.000792766
335.561	0.04044	307.104	0.07747	306.95	0.00565	335.696	0.000761485
336.518	0.0405	307.255	0.07744	307.098	0.00566	336.653	0.000745916
337.475	0.04056	307.436	0.07755	307.285	0.00568	337.609	0.000756121
338.434	0.04054	307.582	0.07738	307.43	0.00574	338.567	0.000758076
339.426	0.04062	307.735	0.07769	307.578	0.00573	339.561	0.000732636
340.39	0.04066	307.882	0.07748	307.724	0.00576	340.517	0.00077095
341.35	0.04069	308.034	0.07772	307.87	0.00578	341.476	0.000769424
342.306	0.04074	308.182	0.07755	308.019	0.00575	342.435	0.000746202
343.264	0.04078	308.33	0.07767	308.172	0.00578	343.397	0.000765228
344.222	0.04072	308.478	0.07761	308.319	0.00578	344.356	0.000758886
345.18	0.04082	308.628	0.07812	308.468	0.00579	345.316	0.0007442
346.14	0.04086	308.774	0.07751	308.614	0.00578	346.279	0.000748611
347.103	0.04088	308.921	0.07819	308.76	0.00584	347.237	0.000747943
348.063	0.04088	309.069	0.07788	308.906	0.00585	348.199	0.000735641
349.021	0.04097	309.218	0.07782	309.052	0.00583	349.159	0.000750923
349.979	0.04096	309.364	0.07793	309.197	0.00584	350.116	0.000756073
350.939	0.04099	309.511	0.07783	309.345	0.00587	351.072	0.000760412
351.896	0.04099	309.658	0.07802	309.491	0.00591	352.031	0.000745988
352.852	0.04103	309.807	0.07792	309.638	0.00587	352.99	0.000790262
353.808	0.04082	309.975	0.07796	309.785	0.00589	353.947	0.000754285
354.799	0.04119	310.124	0.07799	309.932	0.00588	354.937	0.000759649
355.756	0.04118	310.271	0.0783	310.079	0.00591	355.893	0.000733185
356.713	0.04109	310.422	0.07827	310.226	0.00595	356.85	0.000748873
357.669	0.04114	310.57	0.078	310.372	0.00592	357.81	0.000716472
358.626	0.04115	310.724	0.07813	310.518	0.00593	358.767	0.000771642
359.585	0.04126	310.872	0.07815	310.665	0.00593	359.726	0.000751472
360.544	0.04115	311.02	0.07814	310.81	0.00597	360.686	0.000773382
361.505	0.0412	311.168	0.07823	310.957	0.00598	361.646	0.000764442
362.465	0.04121	311.318	0.07802	311.104	0.00598	362.606	0.000762343
363.422	0.04121	311.467	0.07835	311.25	0.00597	363.564	0.000778461
364.382	0.04126	311.62	0.07807	311.397	0.006	364.522	0.00074482
365.343	0.04128	311.767	0.07816	311.545	0.00602	365.483	0.000763702
366.299	0.04131	311.914	0.07864	311.691	0.00607	366.439	0.000725532
367.257	0.04134	312.06	0.07836	311.837	0.00602	367.397	0.000760102
368.214	0.04131	312.21	0.07823	311.982	0.00604	368.355	0.000727034
369.174	0.04135	312.357	0.07856	312.128	0.00605	369.314	0.000805378
370.165	0.04137	312.505	0.07842	312.277	0.00607	370.306	0.000735092
371.122	0.04141	312.652	0.07835	312.424	0.00606	371.265	0.00079391
372.079	0.04143	312.799	0.0786	312.57	0.00608	372.226	0.000795794
373.044	0.04142	312.95	0.07853	312.718	0.00605	373.186	0.000740624
373.999	0.04139	313.098	0.07855	312.866	0.00605	374.147	0.000775838
374.956	0.04147	313.245	0.07852	313.014	0.00608	375.106	0.000743079
375.915	0.04143	313.392	0.07862	313.162	0.00611	376.067	0.000746226
376.871	0.04147	313.543	0.07877	313.308	0.00608	377.026	0.000767779
377.828	0.04149	313.692	0.07849	313.455	0.00608	377.985	0.000725555
378.785	0.04149	313.84	0.0786	313.601	0.00613	378.946	0.00075779
379.742	0.04136	313.987	0.07879	313.75	0.00612	379.906	0.000741982
380.699	0.04143	314.135	0.0784	313.899	0.00612	380.864	0.000760078
381.656	0.04147	314.285	0.07898	314.047	0.00616	381.821	0.000753856
382.614	0.04144	314.431	0.07858	314.192	0.00616	382.781	0.000718379
383.575	0.04147	314.58	0.07878	314.339	0.00615	383.741	0.000797486
384.533	0.04142	314.727	0.07853	314.486	0.00615	384.706	0.000764036
385.528	0.04152	314.872	0.07864	314.632	0.00617	385.696	0.000738955
386.488	0.04153	315.02	0.07854	314.779	0.00619	386.655	0.000770521
387.45	0.04158	315.168	0.07883	314.926	0.00621	387.613	0.000755715
388.408	0.04154	315.318	0.0786	315.079	0.00619	388.575	0.000780511
389.368	0.04154	315.465	0.07889	315.225	0.00621	389.532	0.000748944
390.327	0.0415	315.612	0.07865	315.37	0.00622	390.49	0.000769544
391.285	0.04158	315.758	0.07882	315.516	0.00617	391.451	0.000767374
392.242	0.04155	315.905	0.07912	315.663	0.00622	392.409	0.000704885
393.201	0.04157	316.053	0.07896	315.81	0.00624	393.367	0.000761175
394.158	0.04162	316.2	0.07877	315.957	0.00626	394.326	0.000713515
395.116	0.04162	316.346	0.07875	316.105	0.00625	395.284	0.000789976
396.077	0.0416	316.498	0.07878	316.251	0.00625	396.242	0.000745702
397.036	0.04165	316.644	0.07895	316.4	0.00627	397.204	0.000754738
397.992	0.04161	316.79	0.07904	316.548	0.00625	398.167	0.000793219
398.95	0.04163	316.939	0.07901	316.694	0.00627	399.126	0.000731468
399.912	0.04167	317.091	0.07894	316.843	0.00628	400.084	0.000772047
400.902	0.04165	317.238	0.07922	316.988	0.00628	401.076	0.000752163
401.862	0.04165	317.388	0.07931	317.137	0.0063	402.035	0.000748038
402.824	0.04164	317.537	0.07909	317.285	0.00628	402.996	0.000774503
403.785	0.04166	317.684	0.07911	317.434	0.00629	403.956	0.000776863
404.742	0.04167	317.836	0.07917	317.581	0.00627	404.913	0.000753069
405.7	0.04171	317.983	0.07901	317.728	0.00632	405.873	0.000724149
406.661	0.04168	318.132	0.07907	317.88	0.00628	406.831	0.000785875
407.618	0.04172	318.285	0.07917	318.027	0.00633	407.792	0.000748396
408.578	0.04171	318.435	0.079	318.175	0.00635	408.751	0.000756502
409.535	0.04175	318.588	0.0794	318.32	0.00634	409.713	0.000796676
410.492	0.04174	318.74	0.07905	318.467	0.00632	410.671	0.000714326
411.449	0.04173	318.886	0.07948	318.615	0.00636	411.631	0.000776148
412.406	0.04129	319.034	0.07931	318.762	0.00635	412.592	0.000795889
413.364	0.04177	319.188	0.07939	318.909	0.00638	413.553	0.00074327
414.322	0.04179	319.34	0.07941	319.055	0.00639	414.513	0.000785184
415.279	0.0418	319.488	0.07956	319.2	0.00639	415.471	0.000767159
416.268	0.04186	319.635	0.07927	319.354	0.00636	416.466	0.000752211
417.226	0.04184	319.782	0.07895	319.5	0.00638	417.424	0.000782752
418.182	0.04188	319.931	0.0793	319.65	0.0064	418.384	0.000737047
419.141	0.04184	320.078	0.07911	319.798	0.0064	419.346	0.000757647
420.098	0.04176	320.227	0.07883	319.945	0.00637	420.307	0.000778532
421.057	0.0419	320.375	0.07934	320.09	0.00648	421.264	0.000733852
422.014	0.04204	320.525	0.07927	320.238	0.00641	422.223	0.000754976
422.975	0.04194	320.678	0.07903	320.385	0.00643	423.181	0.000748158
423.933	0.04193	320.83	0.07919	320.531	0.00635	424.143	0.00075717
424.892	0.04196	320.978	0.07889	320.679	0.00641	425.101	0.000748611
425.848	0.04194	321.125	0.07932	320.827	0.00646	426.059	0.000773144
426.807	0.04194	321.273	0.07975	320.975	0.00638	427.019	0.000785303
427.764	0.04187	321.42	0.07947	321.122	0.00646	427.983	0.00073595
428.723	0.04194	321.568	0.07954	321.268	0.00647	428.941	0.000790286
429.68	0.04192	321.717	0.07949	321.415	0.00651	429.899	0.000745368
430.64	0.04191	321.87	0.07945	321.563	0.00643	430.858	0.000757503
431.632	0.04194	322.025	0.07945	321.71	0.00647	431.85	0.00078063
432.59	0.04183	322.179	0.07911	321.857	0.00656	432.807	0.000736094
433.548	0.04193	322.332	0.07937	322.002	0.0065	433.769	0.000782466
434.504	0.04193	322.512	0.07934	322.15	0.00645	434.727	0.000729847
435.466	0.04195	322.66	0.07922	322.305	0.0065	435.688	0.000760365
436.426	0.04194	322.81	0.07964	322.493	0.00678	436.646	0.000765538
437.385	0.04193	322.957	0.07967	322.638	0.00652	437.606	0.000775313
438.342	0.04196	323.104	0.07952	322.787	0.0065	438.566	0.000774813
439.3	0.04201	323.255	0.07966	322.935	0.00652	439.527	0.000749779
440.257	0.04198	323.405	0.07973	323.081	0.00655	440.49	0.000770474
441.216	0.04201	323.552	0.07981	323.227	0.00655	441.45	0.000776744
442.172	0.04199	323.7	0.07946	323.38	0.00653	442.411	0.000767803
443.128	0.042	323.848	0.07954	323.533	0.0065	443.374	0.000744844
444.086	0.04187	323.996	0.07948	323.68	0.00656	444.332	0.000796342
445.043	0.04198	324.146	0.07967	323.829	0.00653	445.291	0.000775075
446.004	0.04201	324.295	0.0798	323.977	0.00652	446.252	0.000747633
446.995	0.04203	324.444	0.07936	324.125	0.00657	447.244	0.000762749
447.952	0.04203	324.595	0.07973	324.27	0.00656	448.203	0.000724816
448.908	0.04205	324.747	0.07955	324.42	0.0066	449.162	0.000800323
449.865	0.04198	324.894	0.07967	324.567	0.00667	450.123	0.000756764
450.824	0.04211	325.043	0.07961	324.715	0.00653	451.085	0.000738573
451.781	0.04209	325.19	0.0798	324.86	0.00662	452.045	0.000770855
452.738	0.04206	325.34	0.07962	325.008	0.00663	453.003	0.000730109
453.7	0.04214	325.488	0.07979	325.154	0.0066	453.964	0.000764871
454.656	0.04208	325.638	0.08014	325.299	0.00657	454.923	0.000757575
455.618	0.04212	325.785	0.0797	325.448	0.0066	455.883	0.000747609
456.576	0.04206	325.933	0.07975	325.594	0.00661	456.845	0.00077765
457.536	0.04205	326.08	0.08006	325.742	0.00661	457.804	0.000749087
458.497	0.04221	326.228	0.0795	325.888	0.00655	458.762	0.000767994
459.456	0.04216	326.376	0.07977	326.034	0.0066	459.721	0.000777149
460.415	0.04225	326.524	0.08008	326.182	0.00664	460.68	0.000759721
461.372	0.04222	326.672	0.08004	326.327	0.00661	461.637	0.000754714
462.363	0.04222	326.82	0.07996	326.475	0.00664	462.632	0.000743127
463.321	0.0422	326.968	0.08018	326.62	0.00667	463.599	0.000720787
464.276	0.04227	327.122	0.08011	326.767	0.00667	464.556	0.000791454
465.235	0.04218	327.27	0.07985	326.913	0.0066	465.515	0.00074079
466.193	0.04232	327.416	0.08011	327.058	0.00673	466.476	0.000754714
467.152	0.0422	327.564	0.07998	327.207	0.00665	467.44	0.000769615
468.113	0.04229	327.712	0.0799	327.358	0.00669	468.401	0.000761557
469.076	0.04226	327.862	0.07992	327.505	0.00667	469.359	0.00074532
470.034	0.04224	328.01	0.08017	327.651	0.00661	470.317	0.000753522
470.994	0.0423	328.162	0.07975	327.8	0.00669	471.274	0.000767279
471.951	0.04229	328.31	0.08017	327.948	0.00664	472.236	0.000764656
472.908	0.04228	328.458	0.08014	328.103	0.00678	473.195	0.000752616
473.866	0.04234	328.606	0.07991	328.249	0.00668	474.155	0.00080123
474.823	0.04227	328.754	0.08025	328.402	0.00673	475.12	0.000786567
475.78	0.04233	328.904	0.08018	328.549	0.00672	476.079	0.000749612
476.739	0.04228	329.058	0.08004	328.696	0.00668	477.037	0.000775886
477.729	0.04238	329.207	0.08	328.842	0.00669	478.03	0.000753164
478.688	0.0423	329.358	0.07997	328.995	0.00677	478.988	0.000781775
479.646	0.04237	329.508	0.08006	329.142	0.00669	479.945	0.000759578
480.605	0.04231	329.655	0.08	329.288	0.00679	480.903	0.000744104
481.562	0.04243	329.81	0.08016	329.435	0.0067	481.864	0.000782037
482.521	0.04231	329.957	0.07989	329.58	0.00667	482.823	0.000726366
483.479	0.04234	330.105	0.08017	329.73	0.00678	483.782	0.000779176
484.434	0.04234	330.256	0.0802	329.878	0.00672	484.742	0.000751233
485.391	0.04244	330.405	0.08018	330.024	0.00675	485.7	0.000761819
486.351	0.04237	330.552	0.08052	330.172	0.00677	486.659	0.000764489
487.308	0.04244	330.7	0.07999	330.32	0.00674	487.619	0.000738406
488.267	0.04242	330.847	0.07995	330.468	0.00675	488.58	0.000807023
489.225	0.04241	330.996	0.08026	330.614	0.00675	489.539	0.000747395
490.182	0.0424	331.144	0.08008	330.761	0.00673	490.5	0.000753641
491.139	0.04243	331.294	0.08015	330.907	0.00675	491.46	0.000799465
492.095	0.04236	331.442	0.08026	331.055	0.00678	492.419	0.00075233
493.086	0.04252	331.59	0.08025	331.205	0.00678	493.416	0.000741768
494.046	0.04245	331.738	0.08047	331.351	0.00677	494.379	0.000772071
495.004	0.04251	331.887	0.0802	331.5	0.00678	495.342	0.00078795
495.962	0.04246	332.038	0.0805	331.65	0.00678	496.302	0.000776935
496.92	0.04251	332.19	0.08035	331.797	0.00674	497.26	0.000774741
497.878	0.04244	332.344	0.08015	331.95	0.00679	498.219	0.000765133
498.838	0.04256	332.492	0.08024	332.098	0.00675	499.177	0.000754166
499.796	0.0424	332.64	0.0802	332.252	0.00681	500.135	0.000769806
500.752	0.04247	332.787	0.08057	332.402	0.00682	501.097	0.000738573
501.71	0.04251	332.938	0.08054	332.548	0.00676	502.058	0.00076983
502.668	0.04248	333.085	0.08026	332.695	0.00676	503.02	0.000779557
503.629	0.04262	333.232	0.08076	332.843	0.00687	503.977	0.000744486
504.586	0.04257	333.379	0.08037	332.991	0.00684	504.941	0.00075233
505.546	0.04258	333.528	0.08012	333.14	0.00687	505.903	0.000781012
506.504	0.04252	333.675	0.08055	333.288	0.00689	506.861	0.000741076
507.462	0.04258	333.825	0.08024	333.434	0.00684	507.822	0.000774002
508.452	0.04258	333.974	0.08035	333.588	0.00688	508.814	0.000795245
509.409	0.04259	334.122	0.08048	333.735	0.00682	509.775	0.00072248
510.37	0.04256	334.273	0.08045	333.884	0.00685	510.735	0.000791168
511.329	0.04259	334.42	0.08042	334.031	0.00682	511.695	0.000777531
512.292	0.0426	334.567	0.0807	334.177	0.00683	512.653	0.000726151
513.25	0.04249	334.713	0.08045	334.324	0.00688	513.619	0.000764656
514.207	0.04263	334.862	0.08051	334.471	0.00685	514.58	0.000824595
515.17	0.04258	335.014	0.08015	334.618	0.00686	515.539	0.000748086
516.132	0.04261	335.163	0.08052	334.764	0.00687	516.497	0.00076642
517.091	0.04268	335.31	0.08064	334.914	0.00687	517.455	0.00079248
518.048	0.04261	335.463	0.08058	335.06	0.00686	518.415	0.00071373
519.005	0.0426	335.612	0.08063	335.211	0.00685	519.373	0.000810051
519.962	0.04264	335.76	0.08048	335.357	0.0069	520.33	0.000720525
520.918	0.04262	335.907	0.08039	335.504	0.00691	521.291	0.000778031
521.875	0.04269	336.055	0.08055	335.65	0.0069	522.249	0.000746179
522.836	0.04266	336.202	0.08063	335.8	0.0069	523.21	0.000788975
523.826	0.04257	336.35	0.0805	335.947	0.0069	524.203	0.000794077
524.786	0.04263	336.498	0.0805	336.092	0.00689	525.161	0.000741625
525.749	0.04266	336.646	0.08061	336.242	0.00692	526.119	0.00080502
526.706	0.04268	336.796	0.08076	336.391	0.00691	527.08	0.000753379
527.666	0.04259	336.948	0.08074	336.537	0.00694	528.039	0.000782204
528.624	0.0427	337.096	0.08072	336.689	0.00699	529.002	0.000813627
529.583	0.0427	337.245	0.08065	336.836	0.00692	529.966	0.000798035
530.54	0.04264	337.4	0.08059	336.984	0.00691	530.926	0.000768518
531.498	0.0427	337.58	0.08067	337.136	0.00697	531.886	0.000776601
532.455	0.0427	337.728	0.08032	337.285	0.00692	532.845	0.000765324
533.415	0.04271	337.874	0.08085	337.438	0.00695	533.804	0.000774431
534.374	0.04272	338.024	0.08061	337.624	0.00693	534.765	0.000767136
535.336	0.04272	338.172	0.08063	337.773	0.00694	535.728	0.000778842
536.296	0.04273	338.32	0.08072	337.919	0.00697	536.689	0.000731015
537.254	0.04273	338.468	0.0806	338.066	0.00696	537.649	0.000769949
538.212	0.04274	338.618	0.08066	338.212	0.00693	538.607	0.000754642
539.205	0.04275	338.765	0.08073	338.36	0.00693	539.603	0.000723863
540.166	0.04276	338.92	0.08068	338.508	0.00692	540.566	0.000768352
541.126	0.04276	339.09	0.08067	338.658	0.00692	541.526	0.000769138
542.084	0.04277	339.236	0.08094	338.804	0.00692	542.485	0.00072906
543.044	0.04277	339.384	0.08083	338.951	0.00696	543.448	0.000769925
544.006	0.04278	339.532	0.08096	339.096	0.00696	544.409	0.000764632
544.963	0.04279	339.68	0.08082	339.25	0.00694	545.372	0.000745296
545.921	0.0428	339.827	0.08077	339.401	0.00701	546.33	0.000776625
546.882	0.04281	339.975	0.08084	339.548	0.00697	547.293	0.00079155
547.845	0.04282	340.126	0.08066	339.696	0.00695	548.256	0.000766587
548.802	0.04282	340.275	0.08085	339.843	0.00693	549.213	0.000766277
549.758	0.04283	340.422	0.08091	339.99	0.00697	550.173	0.000784659
550.717	0.04284	340.572	0.08063	340.136	0.00699	551.136	0.000767779
551.678	0.04285	340.719	0.08073	340.285	0.00699	552.097	0.000752497
552.635	0.04285	340.868	0.08102	340.432	0.007	553.053	0.000806928
553.592	0.04286	341.017	0.08092	340.58	0.00699	554.012	0.000777364
554.583	0.04287	341.166	0.08078	340.732	0.00697	555.003	0.000769806
555.541	0.04287	341.314	0.08074	340.878	0.00698	555.963	0.000740314
556.501	0.04288	341.462	0.08069	341.029	0.00698	556.923	0.000814557
557.458	0.04289	341.611	0.08093	341.194	0.00696	557.881	0.000726295
558.415	0.0429	341.763	0.08095	341.347	0.00701	558.84	0.000785661
559.372	0.0429	341.912	0.08096	341.494	0.00699	559.797	0.000742125
560.328	0.04291	342.065	0.08073	341.641	0.00699	560.756	0.000802898
561.284	0.04292	342.214	0.08091	341.788	0.00701	561.714	0.000772119
562.24	0.04293	342.368	0.08098	341.937	0.00702	562.672	0.000774288
563.196	0.04294	342.518	0.08102	342.083	0.00705	563.635	0.000789905
564.155	0.04294	342.669	0.08098	342.232	0.00703	564.593	0.000749707
565.111	0.04295	342.82	0.08078	342.38	0.00702	565.551	0.000788784
566.066	0.04296	342.968	0.08127	342.529	0.00703	566.51	0.000749516
567.024	0.04297	343.117	0.08068	342.676	0.00701	567.472	0.000720358
567.984	0.04298	343.265	0.08092	342.825	0.007	568.429	0.000766373
568.941	0.04298	343.414	0.08091	342.972	0.00704	569.387	0.000756836
569.931	0.04299	343.562	0.08096	343.122	0.00705	570.379	0.000778103
570.888	0.043	343.712	0.08118	343.269	0.00706	571.341	0.000769496
571.846	0.04301	343.862	0.08078	343.416	0.00705	572.299	0.000793433
572.804	0.04301	344.01	0.08117	343.562	0.00705	573.258	0.000765348
573.763	0.04302	344.158	0.08094	343.711	0.00701	574.216	0.000779414
574.723	0.04303	344.308	0.08087	343.862	0.00704	575.176	0.000785184
575.679	0.04304	344.46	0.08101	344.01	0.00703	576.134	0.000776744
576.64	0.04304	344.609	0.08077	344.158	0.007	577.092	0.000772905
577.596	0.04305	344.762	0.08129	344.305	0.00703	578.056	0.000755477
578.554	0.04306	344.91	0.08107	344.45	0.00707	579.013	0.000770164
579.511	0.04307	345.057	0.08091	344.6	0.00706	579.971	0.000734997
580.468	0.04308	345.204	0.08109	344.752	0.00707	580.929	0.000783587
581.426	0.04309	345.35	0.08063	344.92	0.00704	581.89	0.000775647
582.382	0.04309	345.5	0.08104	345.067	0.00711	582.851	0.000753689
583.338	0.0431	345.647	0.08122	345.216	0.00708	583.813	0.000762892
584.296	0.04311	345.798	0.0809	345.365	0.00707	584.773	0.000779605
585.286	0.04312	345.945	0.08143	345.512	0.00708	585.767	0.000751781
586.246	0.04313	346.095	0.08084	345.66	0.0071	586.726	0.000787306
587.204	0.04314	346.246	0.08115	345.807	0.00705	587.688	0.000785708
588.161	0.04315	346.394	0.0812	345.955	0.0071	588.65	0.000746131
589.119	0.04316	346.542	0.08096	346.102	0.0071	589.607	0.000798416
590.076	0.04317	346.69	0.08112	346.251	0.00712	590.565	0.000756073
591.036	0.04318	346.84	0.08124	346.402	0.00709	591.524	0.0008044
591.993	0.04319	346.989	0.08127	346.548	0.00713	592.483	0.000753117
592.951	0.0432	347.137	0.08097	346.698	0.00714	593.443	0.000750828
593.907	0.04321	347.29	0.08105	346.846	0.00711	594.402	0.000769186
594.864	0.04323	347.437	0.08129	346.995	0.00712	595.365	0.000745869
595.824	0.04324	347.586	0.0808	347.142	0.00711	596.324	0.000747132
596.785	0.04325	347.736	0.08113	347.29	0.0071	597.281	0.000776339
597.742	0.04326	347.888	0.08117	347.439	0.0071	598.243	0.000724888
598.7	0.04327	348.037	0.08091	347.59	0.00711	599.203	0.000787592
599.658	0.04328	348.184	0.08132	347.745	0.00713	600.166	0.000798011
600.649	0.04329	348.335	0.081	347.892	0.00714	601.157	0.000750351
601.61	0.0433	348.484	0.0811	348.041	0.00712	602.116	0.00078783
602.568	0.04331	348.653	0.08139	348.192	0.00711	603.093	-5.93424e-05
603.527	0.04332	348.802	0.08105	348.34	0.00713	604.052	-3.5882e-05
604.484	0.04334	348.952	0.08107	348.49	0.00713	605.011	-4.14371e-05
605.444	0.04335	349.1	0.08109	348.637	0.00709	605.971	-2.4724e-05
606.406	0.04335	349.248	0.08118	348.785	0.00715	606.933	-3.12567e-05
607.365	0.04336	349.399	0.08132	348.932	0.00715	607.89	-5.45263e-05
608.323	0.04337	349.548	0.08126	349.08	0.00714	608.849	4.74453e-06
609.282	0.04339	349.697	0.08137	349.227	0.00718	609.809	-6.16789e-05
610.24	0.04339	349.846	0.08143	349.375	0.00713	610.768	-3.75032e-05
611.197	0.04341	350.001	0.08108	349.521	0.00713	611.733	-2.51055e-05
612.154	0.04342	350.152	0.08114	349.669	0.00716	612.693	-9.63211e-06
613.112	0.04343	350.3	0.08098	349.825	0.00713	613.654	-5.96762e-05
614.071	0.04344	350.45	0.08128	349.972	0.00714	614.617	-5.58138e-05
615.029	0.04345	350.598	0.08113	350.12	0.00715	615.581	-1.35899e-05
616.02	0.04346	350.748	0.08119	350.266	0.00716	616.573	-3.98159e-05
616.978	0.04347	350.896	0.08141	350.415	0.00719	617.531	-1.33038e-05
617.94	0.04348	351.044	0.08096	350.563	0.0072	618.493	-1.12534e-05
618.896	0.04349	351.198	0.0813	350.71	0.00719	619.453	-7.81298e-05
619.856	0.0435	351.347	0.08136	350.857	0.00716	620.412	-5.74112e-05
620.812	0.0435	351.495	0.08134	351.005	0.00717	621.371	-3.52859e-05
621.773	0.04351	351.644	0.08111	351.158	0.00719	622.328	-8.51154e-05
622.73	0.04352	351.791	0.08142	351.306	0.00717	623.285	-1.96934e-05
623.693	0.04352	351.94	0.08137	351.452	0.00717	624.246	-5.55992e-05
624.648	0.04352	352.09	0.08143	351.601	0.00721	625.207	-4.9901e-05
625.608	0.04353	352.24	0.08142	351.752	0.00715	626.166	-2.83241e-05
626.565	0.04354	352.39	0.08134	351.898	0.0072	627.128	-5.5027e-05
627.52	0.04354	352.538	0.08137	352.045	0.00722	628.089	-3.45469e-05
628.478	0.04355	352.72	0.08137	352.192	0.00719	629.049	-2.32697e-05
629.437	0.04355	352.868	0.0817	352.34	0.00716	630.008	-6.47783e-05
630.395	0.04355	353.017	0.08112	352.488	0.00717	630.967	-2.62022e-05
631.386	0.04356	353.19	0.08129	352.668	0.00719	631.96	-6.37293e-05
632.344	0.04356	353.34	0.08163	352.816	0.0072	632.918	-3.90291e-05
633.3	0.04357	353.488	0.08136	352.964	0.0072	633.875	-8.95023e-05
634.262	0.04357	353.635	0.08116	353.11	0.00722	634.833	-4.62055e-05
635.222	0.04358	353.785	0.08164	353.26	0.00721	635.79	-6.41823e-05
636.183	0.04358	353.934	0.08152	353.427	0.00723	636.753	-5.21898e-05
637.141	0.04359	354.083	0.08148	353.575	0.00719	637.711	-3.64542e-05
638.099	0.04359	354.235	0.08143	353.72	0.0072	638.673	-6.27279e-05
639.056	0.04361	354.385	0.08163	353.868	0.00721	639.631	4.3869e-06
640.015	0.04362	354.535	0.08135	354.017	0.00722	640.59	-4.61817e-05
640.974	0.04364	354.683	0.08146	354.162	0.00724	641.549	-2.55346e-05
641.932	0.04364	354.832	0.08172	354.308	0.00721	642.51	-4.87089e-05
642.888	0.04365	354.98	0.08136	354.462	0.00727	643.471	-6.57082e-05
643.845	0.04366	355.128	0.08156	354.608	0.00721	644.429	-4.32968e-05
644.805	0.04367	355.276	0.08177	354.756	0.00722	645.391	-3.42846e-05
645.762	0.04367	355.426	0.08144	354.902	0.00719	646.349	-7.51019e-05
646.752	0.04367	355.577	0.08177	355.05	0.00721	647.344	-4.02689e-05
647.71	0.04369	355.73	0.08134	355.198	0.00724	648.308	-4.4632e-05
648.668	0.0437	355.88	0.08158	355.346	0.00721	649.271	-5.84126e-05
649.628	0.04368	356.028	0.08142	355.493	0.00725	650.23	-5.68867e-05
650.586	0.04369	356.178	0.0817	355.64	0.00723	651.189	-3.86238e-05
651.544	0.0437	356.328	0.08166	355.79	0.00723	652.148	-7.4935e-05
652.501	0.04371	356.475	0.08156	355.937	0.00721	653.106	1.1754e-05
653.459	0.04372	356.625	0.08167	356.084	0.00723	654.064	-5.29289e-05
654.419	0.04373	356.776	0.08161	356.238	0.00721	655.022	9.2268e-06
655.376	0.04374	356.925	0.08153	356.384	0.00723	655.981	-8.78572e-05
656.334	0.04375	357.072	0.08144	356.53	0.00722	656.942	-4.54426e-05
657.292	0.04376	357.221	0.08119	356.679	0.00729	657.901	2.38419e-07
658.249	0.04377	357.372	0.08186	356.829	0.00733	658.863	-9.22918e-05
659.208	0.04379	357.522	0.08124	356.976	0.00723	659.821	-2.09808e-05
660.167	0.04379	357.673	0.0817	357.124	0.00726	660.783	-2.52724e-05
661.125	0.04381	357.824	0.08154	357.27	0.00728	661.742	-9.17912e-05
662.118	0.04382	357.972	0.08146	357.42	0.00724	662.738	-3.79324e-05
663.076	0.04383	358.122	0.08153	357.567	0.00726	663.697	-3.81947e-05
664.036	0.04384	358.272	0.08134	357.715	0.00726	664.657	-9.63449e-05
664.992	0.04386	358.42	0.08155	357.863	0.00724	665.62	-6.69003e-05
665.951	0.04387	358.567	0.08152	358.01	0.00724	666.579	-3.54052e-05
666.908	0.04388	358.714	0.0815	358.158	0.00729	667.543	-5.65767e-05
667.865	0.04389	358.87	0.08151	358.312	0.00728	668.51	-5.05209e-05
668.825	0.04393	359.019	0.08159	358.461	0.00724	669.47	-9.25779e-05
669.783	0.04393	359.168	0.08157	358.61	0.00729	670.428	-3.98159e-06
670.74	0.04394	359.317	0.0814	358.756	0.00728	671.386	-0.000124955
671.698	0.04394	359.468	0.08164	358.904	0.00724	672.343	-5.84126e-06
672.655	0.04394	359.615	0.08155	359.052	0.00728	673.303	-5.3215e-05
673.612	0.04395	359.77	0.08193	359.2	0.00731	674.264	-7.40051e-05
674.571	0.04395	359.917	0.08176	359.35	0.00723	675.224	1.33514e-06
675.529	0.04395	360.066	0.08142	359.496	0.00728	676.187	-3.86238e-05
676.487	0.04395	360.214	0.08146	359.644	0.00731	677.15	-9.48429e-05
677.477	0.04395	360.362	0.08168	359.792	0.00728	678.141	-1.21593e-05
678.434	0.04396	360.51	0.08155	359.94	0.00729	679.101	-3.17812e-05
679.394	0.04396	360.658	0.08155	360.087	0.00728	680.061	-7.95126e-05
680.352	0.04397	360.808	0.08162	360.236	0.00729	681.019	-8.72612e-06
681.311	0.04397	360.955	0.08156	360.385	0.00731	681.981	-4.58956e-05
682.27	0.04397	361.104	0.08185	360.532	0.00731	682.939	-5.58853e-05
683.228	0.04398	361.255	0.08168	360.679	0.00732	683.901	-4.19617e-06
684.186	0.04398	361.41	0.08141	360.829	0.00732	684.859	-8.7738e-05
685.144	0.04398	361.56	0.08148	360.977	0.0073	685.824	-7.36952e-05
686.106	0.04399	361.71	0.0813	361.127	0.00734	686.783	-9.84669e-06
687.064	0.04399	361.862	0.08164	361.275	0.00728	687.742	-0.000108504
688.026	0.044	362.012	0.08173	361.422	0.00732	688.706	-5.81741e-05
688.983	0.04399	362.162	0.08173	361.569	0.00732	689.666	-5.09739e-05
689.943	0.04399	362.309	0.08161	361.716	0.00728	690.626	-8.20398e-05
690.903	0.04401	362.467	0.08144	361.862	0.00733	691.585	-9.74178e-05
691.865	0.04401	362.618	0.08148	362.01	0.00731	692.543	-3.15666e-05
692.858	0.04402	362.766	0.08164	362.157	0.0073	693.536	-0.000100279
693.816	0.04402	362.915	0.0815	362.303	0.0073	694.496	-2.24113e-06
694.773	0.04403	363.064	0.08159	362.454	0.0073	695.455	-6.20127e-05
695.73	0.04404	363.212	0.08188	362.6	0.00732	696.417	-8.47101e-05
696.691	0.04405	363.36	0.08156	362.757	0.00733	697.379	0
697.651	0.04405	363.508	0.08115	362.907	0.00733	698.337	-4.90189e-05
698.61	0.04405	363.658	0.08161	363.055	0.0073	699.296	-5.23806e-05
699.568	0.04405	363.81	0.08179	363.202	0.00732	700.26	-9.98974e-06
700.526	0.04406	363.957	0.08163	363.35	0.00734	701.223	-2.96593e-05
701.486	0.04406	364.11	0.08178	363.497	0.00734	702.182	-6.04868e-05
702.445	0.04407	364.258	0.08161	363.644	0.00733	703.143	-2.57254e-05
703.402	0.04407	364.408	0.08171	363.792	0.00736	704.102	-1.8096e-05
704.358	0.04408	364.557	0.08184	363.94	0.00733	705.061	-4.80413e-05
705.317	0.04409	364.705	0.082	364.087	0.00732	706.021	-4.31776e-05
706.278	0.04409	364.854	0.08177	364.234	0.00733	706.986	-3.07322e-05
707.236	0.0441	365.002	0.08182	364.382	0.00736	707.944	-7.689e-05
708.23	0.04412	365.152	0.08159	364.564	0.00735	708.936	-1.5521e-05
709.188	0.04414	365.304	0.08175	364.717	0.00737	709.893	-0.000102043
710.151	0.04414	365.453	0.08161	364.866	0.00735	710.852	-2.26736e-05
711.108	0.04416	365.603	0.08171	365.014	0.00734	711.812	-8.43525e-05
712.066	0.04416	365.753	0.08186	365.163	0.00735	712.769	-2.44856e-05
713.022	0.04418	365.902	0.08163	365.312	0.00739	713.727	-4.43935e-05
713.98	0.04419	366.05	0.08193	365.468	0.00733	714.688	-5.6529e-05
714.938	0.0442	366.198	0.08186	365.615	0.00738	715.647	-7.31945e-06
715.897	0.04421	366.346	0.08186	365.762	0.00738	716.606	-6.41346e-05
716.857	0.04422	366.497	0.08201	365.91	0.00736	717.566	-1.76191e-05
717.815	0.04423	366.645	0.08181	366.058	0.00739	718.525	-3.59535e-05
718.773	0.04424	366.798	0.0821	366.207	0.00736	719.489	-9.64403e-05
719.73	0.04425	366.95	0.0818	366.356	0.00738	720.449	-6.44922e-05
720.69	0.04426	367.1	0.08202	366.505	0.00737	721.407	-1.07765e-05
721.652	0.04426	367.252	0.08168	366.653	0.0074	722.37	-8.84533e-05
722.61	0.04427	367.407	0.08208	366.801	0.0074	723.33	-4.50373e-05
723.602	0.04428	367.558	0.08166	366.952	0.00738	724.323	-2.8944e-05
724.563	0.04429	367.707	0.08199	367.1	0.00741	725.283	-0.000103426
725.522	0.0443	367.895	0.08186	367.252	0.00737	726.243	-4.2367e-05
726.481	0.04431	368.045	0.08173	367.402	0.00741	727.201	-2.79665e-05
727.437	0.04428	368.192	0.08204	367.55	0.0074	728.16	-6.4826e-05
728.397	0.04429	368.344	0.08173	367.698	0.00738	729.117	-1.75715e-05
729.354	0.04429	368.492	0.08211	367.88	0.00741	730.079	-5.48363e-05
730.313	0.0443	368.64	0.08197	368.028	0.00737	731.039	-5.01871e-05
731.275	0.04431	368.79	0.08201	368.176	0.00737	731.997	-2.60115e-05
732.233	0.04432	368.94	0.08191	368.322	0.00741	732.957	-4.15802e-05
733.192	0.04432	369.088	0.08188	368.47	0.00739	733.917	-5.03063e-06
734.151	0.04433	369.236	0.082	368.623	0.00741	734.879	-4.58479e-05
735.106	0.04434	369.384	0.08193	368.77	0.00739	735.839	-9.05037e-05
736.069	0.04435	369.532	0.08199	368.918	0.00741	736.803	-2.61545e-05
737.026	0.04435	369.682	0.08208	369.067	0.00742	737.767	-6.7234e-06
737.984	0.04436	369.832	0.08179	369.222	0.00741	738.727	-2.79665e-05
738.974	0.04436	369.982	0.08218	369.373	0.00743	739.721	-6.82354e-05
739.933	0.04437	370.13	0.08189	369.519	0.00742	740.678	6.55651e-06
740.894	0.04438	370.282	0.08196	369.666	0.00744	741.636	-9.33886e-05
741.852	0.04439	370.432	0.08204	369.815	0.00742	742.596	-5.07832e-06
742.808	0.04439	370.58	0.08187	369.962	0.00739	743.554	-7.83682e-05
743.766	0.0444	370.73	0.082	370.11	0.00745	744.516	-8.96931e-05
744.726	0.04441	370.878	0.08193	370.258	0.00744	745.473	-2.3222e-05
745.684	0.04441	371.027	0.08216	370.407	0.00742	746.433	-7.8249e-05
746.642	0.04442	371.176	0.08222	370.555	0.00743	747.393	-1.95026e-05
747.6	0.04443	371.325	0.08213	370.704	0.00743	748.353	-4.36783e-05
748.558	0.04444	371.476	0.08207	370.853	0.00744	749.316	-7.689e-05
749.516	0.04445	371.627	0.08217	371.005	0.00742	750.274	-3.75986e-05
750.474	0.04446	371.782	0.08215	371.152	0.00745	751.233	-3.87192e-05
751.434	0.04447	371.935	0.08211	371.3	0.00743	752.194	-9.22918e-05
752.392	0.04448	372.088	0.08197	371.449	0.00742	753.153	-5.48363e-06
753.353	0.04448	372.245	0.0821	371.596	0.00744	754.115	-3.04699e-05
754.345	0.04449	372.393	0.08231	371.748	0.00741	755.107	-6.73771e-05
755.303	0.0445	372.543	0.08214	371.917	0.00744	756.066	-2.90155e-05
756.263	0.04451	372.692	0.08227	372.066	0.00744	757.024	-9.47237e-05
757.222	0.04452	372.84	0.08218	372.214	0.00746	757.983	-3.44038e-05
758.182	0.04453	372.99	0.08191	372.36	0.00744	758.943	-8.23498e-05
759.143	0.04454	373.14	0.08206	372.51	0.00748	759.901	-4.27485e-05
760.105	0.04455	373.288	0.08197	372.656	0.00745	760.859	-4.82559e-05
761.064	0.04456	373.437	0.08177	372.808	0.00744	761.819	-6.13213e-05
762.022	0.04457	373.588	0.08189	372.957	0.00744	762.781	-2.90871e-06
762.982	0.04458	373.74	0.08211	373.104	0.00745	763.746	-2.0051e-05
763.943	0.04459	373.887	0.0821	373.252	0.00748	764.703	-5.40257e-05
764.901	0.0446	374.038	0.08182	373.4	0.00745	765.663	-2.92063e-05
765.859	0.04461	374.186	0.08206	373.547	0.00745	766.623	-6.8903e-05
766.818	0.04461	374.337	0.08177	373.695	0.00748	767.617	-5.02586e-05
767.778	0.04462	374.486	0.082	373.844	0.00747	768.579	-1.97649e-05
768.738	0.04463	374.635	0.08231	373.996	0.00747	769.539	-4.3273e-05
769.734	0.04464	374.784	0.08205	374.146	0.00746	770.533	-9.77755e-05
770.692	0.04465	374.931	0.08265	374.292	0.00748	771.495	-3.67165e-05
771.649	0.04465	375.08	0.08215	374.44	0.00745	772.454	-4.50134e-05
772.608	0.04466	375.232	0.08233	374.591	0.00744	773.415	-5.92709e-05
773.569	0.04467	375.38	0.08238	374.742	0.00743	774.377	-6.03914e-05
774.526	0.04468	375.528	0.08241	374.89	0.00746	775.336	-4.57764e-05
775.484	0.04468	375.677	0.08256	375.04	0.00745	776.293	-7.95364e-05
776.443	0.04469	375.828	0.08312	375.19	0.00747	777.256	-4.57287e-05
777.402	0.0447	375.978	0.08252	375.337	0.00749	778.216	-6.67095e-05
778.362	0.04471	376.126	0.08237	375.488	0.00747	779.176	-5.26667e-05
779.323	0.04471	376.275	0.08218	375.64	0.00745	780.135	-2.75612e-05
780.282	0.04472	376.428	0.08245	375.788	0.00749	781.096	-6.97374e-05
781.242	0.04473	376.582	0.08237	375.937	0.00745	782.055	-5.7888e-05
782.204	0.04474	376.732	0.08262	376.093	0.00748	783.013	-4.63724e-05
783.162	0.04475	376.885	0.08223	376.24	0.00745	783.973	-4.47273e-05
784.12	0.04475	377.032	0.08254	376.388	0.00747	784.933	-3.20196e-05
785.112	0.04476	377.185	0.08221	376.537	0.00747	785.926	-8.00848e-05
786.071	0.04477	377.338	0.08201	376.689	0.00746	786.886	-3.65496e-05
787.031	0.04478	377.49	0.08208	376.837	0.00746	787.847	-1.91689e-05
787.99	0.04479	377.638	0.08187	376.989	0.00746	788.807	-8.27789e-05
788.948	0.0448	377.788	0.08207	377.138	0.00747	789.767	-2.19822e-05
789.908	0.04481	377.938	0.0819	377.288	0.00744	790.73	-4.33683e-05
790.867	0.04482	378.085	0.0821	377.436	0.00747	791.691	-6.5589e-05
791.826	0.04483	378.235	0.08225	377.582	0.00747	792.651	-6.28471e-05
792.784	0.04483	378.385	0.08239	377.735	0.00744	793.611	-5.94139e-05
793.743	0.04484	378.533	0.08237	377.883	0.00746	794.57	-8.25644e-05
794.703	0.04485	378.684	0.0826	378.032	0.00747	795.532	-6.98566e-05
795.662	0.04486	378.836	0.08217	378.187	0.00748	796.489	-6.44684e-05
796.621	0.04486	378.995	0.08238	378.334	0.00745	797.449	-5.65529e-05
797.579	0.04487	379.144	0.0823	378.48	0.00745	798.41	-4.99725e-05
798.536	0.04488	379.293	0.08209	378.63	0.00745	799.369	-7.267e-05
799.493	0.04488	379.442	0.08239	378.778	0.00746	800.33	-3.73602e-05
800.484	0.04489	379.595	0.08286	378.926	0.00746	801.326	-2.7442e-05
801.444	0.0449	379.744	0.08291	379.076	0.00747	802.286	-5.64337e-05
802.404	0.0449	379.892	0.08231	379.224	0.00749	803.247	-5.13077e-05
803.365	0.04491	380.04	0.08224	379.372	0.00748	804.204	-3.50475e-05
804.324	0.04492	380.19	0.08219	379.519	0.00745	805.163	-5.20229e-05
805.284	0.04492	380.34	0.08185	379.666	0.00748	806.123	-1.56879e-05
806.243	0.04493	380.487	0.08203	379.812	0.0075	807.083	-9.25541e-05
807.206	0.04494	380.638	0.08197	379.963	0.00746	808.043	-4.4179e-05
808.163	0.04494	380.787	0.08188	380.115	0.00749	809.006	-3.53813e-05
809.121	0.04495	380.936	0.08223	380.262	0.00748	809.969	-4.98772e-05
810.078	0.04496	381.086	0.08215	380.41	0.00747	810.933	-7.36475e-05
811.037	0.04496	381.238	0.08193	380.556	0.00749	811.891	-5.0807e-05
811.995	0.04497	381.39	0.08214	380.704	0.00747	812.854	-3.53813e-05
812.952	0.04497	381.55	0.08273	380.852	0.00748	813.818	-4.26292e-05
813.91	0.04498	381.7	0.08261	381	0.00748	814.778	-7.30753e-05
814.868	0.04499	381.85	0.08287	381.15	0.00749	815.741	-4.91142e-05
815.861	0.04499	382.002	0.08236	381.3	0.00748	816.736	-3.57389e-05
816.821	0.045	382.152	0.08241	381.448	0.00747	817.696	-7.75814e-05
817.778	0.04501	382.302	0.08226	381.6	0.00748	818.659	-7.78198e-05
818.736	0.04502	382.454	0.08229	381.748	0.00747	819.622	-4.87804e-05
819.695	0.04503	382.602	0.0823	381.894	0.00749	820.582	-3.76701e-05
820.653	0.04503	382.752	0.08236	382.046	0.00749	821.547	-6.43253e-05
821.612	0.04504	382.938	0.08235	382.192	0.0075	822.506	-9.20057e-05
822.571	0.04505	383.09	0.0822	382.34	0.00748	823.466	-4.06742e-05
823.529	0.04506	383.24	0.08213	382.49	0.00752	824.427	-8.57115e-05
824.494	0.04507	383.388	0.08195	382.639	0.00749	825.388	-0.00010457
825.452	0.04508	383.539	0.08199	382.787	0.00748	826.347	-4.6277e-05
826.412	0.04509	383.69	0.08214	382.969	0.0075	827.306	-7.93695e-05
827.373	0.04509	383.84	0.08199	383.12	0.0075	828.266	-5.38588e-05
828.33	0.0451	383.992	0.0822	383.27	0.00749	829.226	-5.70536e-05
829.291	0.04511	384.142	0.08216	383.418	0.0075	830.189	-7.89881e-05
830.252	0.04511	384.292	0.08242	383.567	0.0075	831.151	-8.48532e-05
831.245	0.04512	384.444	0.08215	383.715	0.00749	832.145	-4.98772e-05
832.205	0.04513	384.592	0.08227	383.862	0.00751	833.103	-5.19991e-05
833.164	0.04514	384.742	0.08224	384.01	0.00752	834.063	-3.68118e-05
834.123	0.04515	384.89	0.08201	384.158	0.00753	835.023	-2.31266e-05
835.086	0.04515	385.04	0.0823	384.306	0.00753	835.987	-3.28064e-05
836.045	0.04516	385.192	0.08207	384.455	0.00752	836.947	-8.11338e-05
837.002	0.04517	385.34	0.08237	384.602	0.00751	837.907	-1.70231e-05
837.96	0.04518	385.49	0.08224	384.75	0.00748	838.866	-7.38859e-05
838.918	0.04519	385.641	0.08232	384.9	0.0075	839.826	-3.20435e-05
839.881	0.0452	385.795	0.08226	385.048	0.00749	840.786	-4.72784e-05
840.84	0.04521	385.948	0.08302	385.197	0.00751	841.748	-8.22544e-05
841.801	0.04521	386.098	0.083	385.348	0.00753	842.711	-6.7234e-05
842.758	0.04522	386.248	0.08258	385.496	0.0075	843.672	-3.93867e-05
843.721	0.04523	386.397	0.08308	385.647	0.00753	844.636	-4.08411e-05
844.679	0.04524	386.58	0.08256	385.8	0.00751	845.596	-5.36203e-05
845.639	0.04525	386.732	0.08279	385.948	0.00749	846.556	-5.67913e-05
846.63	0.04526	386.883	0.08279	386.097	0.00753	847.549	-6.89507e-05
847.59	0.04527	387.035	0.08294	386.249	0.0075	848.509	-8.29697e-05
848.552	0.04527	387.185	0.08308	386.398	0.00753	849.469	-3.56674e-05
849.513	0.04529	387.332	0.08289	386.55	0.00753	850.429	-8.52346e-05
850.472	0.04529	387.482	0.08301	386.698	0.0075	851.39	-4.76837e-05
851.431	0.0453	387.632	0.08269	386.852	0.00753	852.351	-8.07285e-05
852.391	0.04531	387.785	0.08281	387	0.00751	853.311	-7.17878e-05
853.351	0.04532	387.938	0.08218	387.148	0.00752	854.273	-5.38826e-05
854.309	0.04532	388.088	0.08258	387.294	0.00753	855.231	-5.49078e-05
855.267	0.04533	388.237	0.08252	387.442	0.00753	856.191	-4.66824e-05
856.228	0.04534	388.387	0.08261	387.591	0.00755	857.151	-4.28438e-05
857.189	0.04535	388.538	0.0826	387.74	0.00754	858.111	-5.76735e-05
858.148	0.04535	388.685	0.08259	387.888	0.00755	859.073	-3.99351e-05
859.106	0.04536	388.838	0.0825	388.036	0.00752	860.033	-4.31776e-05
860.064	0.04537	388.988	0.08228	388.185	0.00753	860.997	-4.97103e-05
861.023	0.04538	389.138	0.08287	388.335	0.00754	861.959	-5.24759e-05
862.016	0.04539	389.287	0.08258	388.487	0.00755	862.953	-4.80652e-05
862.974	0.04539	389.439	0.08248	388.637	0.00755	863.913	-5.25951e-05
863.933	0.0454	389.589	0.08268	388.788	0.00755	864.874	-5.57184e-05
864.892	0.04541	389.743	0.08212	388.938	0.00756	865.833	-7.14541e-05
865.851	0.04542	389.892	0.08238	389.086	0.00754	866.794	-6.07014e-05
866.809	0.04543	390.042	0.08226	389.234	0.00753	867.753	-6.45399e-05
867.768	0.04543	390.192	0.08227	389.384	0.00755	868.713	-6.92129e-05
868.728	0.04544	390.344	0.08198	389.532	0.00757	869.673	-5.1403e-05
869.687	0.04545	390.492	0.08226	389.681	0.00755	870.633	-2.83241e-05
870.646	0.04546	390.642	0.08232	389.828	0.00756	871.599	-6.46591e-05
871.604	0.04547	390.792	0.08202	389.981	0.00758	872.564	-5.88179e-05
872.567	0.04547	390.942	0.08231	390.128	0.00754	873.523	-8.13484e-05
873.525	0.04548	391.092	0.08236	390.274	0.00757	874.483	-3.20673e-05
874.484	0.04549	391.242	0.0824	390.422	0.00759	875.443	-6.39439e-05
875.444	0.04549	391.395	0.08245	390.571	0.00756	876.403	-3.39985e-05
876.402	0.0455	391.548	0.08259	390.719	0.00755	877.363	-4.45127e-05
877.397	0.0455	391.7	0.08271	390.867	0.00757	878.357	-4.6587e-05
878.357	0.04551	391.85	0.08281	391.014	0.00755	879.316	-1.22309e-05
879.318	0.04552	392.008	0.08234	391.164	0.00755	880.28	-3.9053e-05
880.276	0.04552	392.158	0.08222	391.312	0.00755	881.24	-5.65052e-05
881.239	0.04553	392.309	0.08225	391.46	0.00757	882.203	-6.50644e-05
882.197	0.04553	392.462	0.08237	391.608	0.00754	883.163	-1.16587e-05
883.155	0.04554	392.612	0.08249	391.758	0.00755	884.123	-6.45399e-05
884.115	0.04554	392.765	0.08244	391.905	0.00761	885.083	-4.06265e-05
885.074	0.04555	392.916	0.08259	392.052	0.00758	886.042	-4.21286e-05
886.035	0.04555	393.065	0.0825	392.202	0.00754	887.005	-9.49144e-05
886.994	0.04556	393.215	0.0826	392.35	0.00757	887.964	-4.05073e-05
887.952	0.04557	393.367	0.08285	392.5	0.00755	888.923	-6.46114e-05
888.912	0.04557	393.517	0.08282	392.652	0.00756	889.886	-8.50439e-05
889.875	0.04558	393.668	0.08298	392.8	0.00757	890.846	-3.61204e-05
890.836	0.04559	393.818	0.08237	392.952	0.00754	891.809	-5.21183e-05
891.796	0.0456	393.972	0.0826	393.101	0.00758	892.771	-7.91311e-05
892.788	0.0456	394.12	0.08268	393.25	0.00757	893.767	-0.000107217
893.746	0.04561	394.273	0.08286	393.399	0.00754	894.726	-4.27246e-05
894.705	0.04562	394.422	0.08248	393.547	0.00757	895.687	-7.7939e-05
895.665	0.04563	394.571	0.08275	393.696	0.00757	896.649	-5.58615e-05
896.626	0.04564	394.722	0.08262	393.844	0.00756	897.613	-6.72817e-05
897.585	0.04564	394.874	0.08278	393.995	0.00758	898.573	-5.79834e-05
898.544	0.04565	395.028	0.08251	394.142	0.0076	899.531	-6.50883e-05
899.503	0.04566	395.178	0.08252	394.29	0.00758	900.496	-6.43253e-05
900.461	0.04567	395.328	0.08246	394.443	0.0076	901.455	-4.68731e-05
901.421	0.04567	395.478	0.08243	394.59	0.0076	902.417	-5.34773e-05
902.382	0.04568	395.63	0.08261	394.74	0.00761	903.377	-4.0555e-05
903.341	0.04569	395.778	0.08248	394.889	0.00759
904.302	0.04569	395.929	0.08257	395.039	0.00758
905.261	0.0457	396.103	0.08264	395.191	0.00763
906.221	0.0457	396.252	0.08294	395.338	0.00757
907.182	0.04571	396.405	0.08261	395.49	0.0076
908.174	0.04571	396.56	0.08266	395.662	0.00758
909.132	0.04571	396.71	0.08267	395.811	0.00761
910.095	0.04572	396.86	0.08234	395.96	0.00758
911.055	0.04572	397.012	0.08263	396.11	0.00756
912.018	0.04573	397.16	0.08257	396.257	0.00759
912.977	0.04573	397.31	0.08299	396.406	0.00763
913.938	0.04574	397.46	0.08279	396.555	0.0076
914.901	0.04574	397.61	0.08283	396.707	0.00761
915.86	0.04575	397.76	0.08252	396.857	0.00761
916.82	0.04575	397.908	0.08272	397.009	0.0076
917.78	0.04575	398.092	0.08276	397.16	0.0076
918.738	0.04575	398.246	0.08272	397.315	0.00757
919.696	0.04575	398.394	0.08275	397.462	0.00759
920.658	0.04576	398.542	0.08243	397.61	0.00761
921.62	0.04577	398.692	0.08263	397.76	0.00759
922.578	0.04577	398.842	0.08302	397.91	0.00761
923.574	0.04579	398.99	0.08263	398.093	0.00761
924.532	0.04579	399.142	0.08291	398.246	0.00757
925.491	0.04579	399.293	0.0828	398.394	0.00761
926.448	0.04579	399.445	0.08261	398.54	0.00761
927.408	0.0458	399.6	0.08266	398.693	0.00762
928.367	0.0458	399.75	0.08269	398.84	0.00764
929.326	0.0458	399.9	0.08279	398.988	0.0076
930.287	0.0458	400.05	0.08285	399.136	0.00763
931.248	0.0458	400.2	0.08282	399.284	0.0076
932.208	0.0458	400.352	0.08312	399.432	0.00761
933.167	0.0458	400.503	0.08318	399.579	0.00758
934.125	0.0458	400.652	0.08311	399.727	0.00758
935.084	0.04581	400.802	0.08309	399.877	0.00763
936.045	0.04582	400.954	0.08296	400.024	0.00761
937.004	0.04582	401.105	0.08306	400.173	0.00759
937.964	0.04582	401.254	0.08313	400.321	0.00764
938.956	0.04583	401.404	0.08319	400.47	0.00768
939.916	0.04584	401.552	0.08324	400.619	0.00763
940.875	0.04585	401.702	0.08297	400.766	0.00764
941.835	0.04586	401.852	0.08285	400.914	0.00761
942.794	0.04587	402.002	0.08297	401.063	0.00764
943.754	0.04588	402.153	0.08281	401.212	0.00765
944.712	0.04589	402.302	0.08321	401.364	0.00763
945.672	0.0459	402.453	0.08273	401.512	0.00764
946.633	0.04591	402.602	0.08308	401.663	0.00761
947.593	0.04592	402.751	0.08251	401.811	0.00763
948.554	0.04593	402.901	0.08297	401.962	0.00763
949.512	0.04594	403.05	0.08292	402.112	0.00764
950.471	0.04595	403.2	0.08299	402.261	0.00761
951.431	0.04596	403.349	0.08285	402.408	0.00762
952.389	0.04597	403.5	0.08268	402.557	0.00766
953.348	0.04597	403.65	0.08291	402.706	0.00763
954.34	0.04598	403.799	0.08291	402.856	0.00768
955.303	0.04598	403.948	0.08269	403.004	0.00765
956.261	0.04599	404.096	0.08297	403.154	0.00761
957.222	0.04599	404.247	0.08265	403.302	0.00765
958.182	0.04599	404.397	0.0829	403.45	0.00764
959.179	0.046	404.546	0.08296	403.6	0.00763
960.138	0.046	404.7	0.08267	403.749	0.00764
961.098	0.04601	404.85	0.08284	403.897	0.00763
962.058	0.04601	405	0.08273	404.045	0.0076
963.017	0.04601	405.152	0.08297	404.192	0.00762
963.977	0.04601	405.302	0.08302	404.342	0.00765
964.939	0.04602	405.451	0.08301	404.495	0.0076
965.899	0.04602	405.602	0.08317	404.642	0.00759
966.858	0.04602	405.752	0.08314	404.79	0.00764
967.816	0.04602	405.902	0.08286	404.938	0.00761
968.778	0.04602	406.05	0.08291	405.087	0.00764
969.771	0.04602	406.2	0.08301	405.24	0.00763
970.73	0.04602	406.355	0.08307	405.393	0.00761
971.689	0.04602	406.505	0.08322	405.54	0.00765
972.652	0.04602	406.658	0.08268	405.693	0.0076
973.614	0.04603	406.81	0.08312	405.842	0.00762
974.576	0.04603	406.96	0.08286	405.991	0.00766
975.538	0.04604	407.109	0.08289	406.14	0.00763
976.499	0.04605	407.261	0.08303	406.291	0.00765
977.46	0.04606	407.41	0.0829	406.44	0.00765
978.421	0.04607	407.561	0.08297	406.59	0.00764
979.382	0.04608	407.717	0.08303	406.75	0.00766
980.342	0.04609	407.865	0.08312	406.9	0.00764
981.302	0.04609	408.015	0.08282	407.052	0.00764
982.264	0.04608	408.167	0.08317	407.2	0.00765
983.227	0.04608	408.321	0.08271	407.348	0.00764
984.188	0.04608	408.47	0.08309	407.496	0.00763
985.183	0.04609	408.62	0.08293	407.644	0.00763
986.142	0.04609	408.769	0.0831	407.792	0.00763
987.102	0.04609	408.924	0.08295	407.941	0.00764
988.062	0.04609	409.078	0.08314	408.09	0.00766
989.024	0.0461	409.228	0.08294	408.238	0.00765
989.988	0.0461	409.378	0.08299	408.388	0.00768
990.948	0.0461	409.528	0.08314	408.536	0.00768
991.906	0.04611	409.678	0.08294	408.685	0.00768
992.866	0.04611	409.83	0.08313	408.832	0.00767
993.826	0.04611	409.98	0.08286	408.98	0.00764
994.786	0.04611	410.13	0.08306	409.128	0.00765
995.745	0.04612	410.28	0.0829	409.28	0.00768
996.705	0.04613	410.43	0.08302	409.43	0.00765
997.667	0.04613	410.582	0.08318	409.578	0.00767
998.625	0.04613	410.732	0.08323	409.727	0.00766
999.585	0.04613	410.882	0.08321	409.876	0.00766
1000.58	0.04613	411.032	0.08329	410.024	0.00765
1001.54	0.04613	411.182	0.08328	410.176	0.00764
1002.5	0.04613	411.332	0.08323	410.324	0.00766
1003.45	0.04612	411.484	0.08301	410.472	0.00765
1004.41	0.04613	411.632	0.08295	410.621	0.00771
1005.37	0.04613	411.785	0.08305	410.768	0.00768
1006.33	0.04612	411.938	0.08289	410.922	0.00768
1007.29	0.04612	412.088	0.08272	411.07	0.00772
1008.25	0.04612	412.236	0.0829	411.221	0.00768
1009.21	0.04611	412.387	0.08267	411.369	0.00768
1010.17	0.04611	412.537	0.08273	411.522	0.00769
1011.13	0.0461	412.686	0.08286	411.67	0.00769
1012.09	0.0461	412.837	0.08291	411.819	0.00768
1013.04	0.04609	412.987	0.08282	411.968	0.00768
1014	0.04609	413.136	0.08264	412.118	0.00765
1014.97	0.04608	413.322	0.08307	412.267	0.00764
1015.96	0.04608	413.473	0.08295	412.418	0.00768
1016.92	0.04608	413.624	0.08327	412.571	0.00767
1017.88	0.04608	413.774	0.08299	412.719	0.00768
1018.84	0.04607	413.925	0.08312	412.87	0.0077
1019.8	0.04607	414.075	0.08311	413.018	0.00767
1020.76	0.04607	414.228	0.08301	413.202	0.00767
1021.72	0.04607	414.378	0.08343	413.35	0.0077
1022.68	0.04607	414.528	0.08325	413.498	0.00769
1023.64	0.04607	414.677	0.08332	413.646	0.0077
1024.6	0.04607	414.83	0.0832	413.798	0.00768
1025.55	0.04607	414.981	0.08336	413.947	0.00768
1026.52	0.04608	415.135	0.08316	414.096	0.00768
1027.47	0.04608	415.288	0.08287	414.245	0.00768
1028.43	0.04608	415.437	0.08291	414.393	0.00771
1029.39	0.04609	415.592	0.0833	414.544	0.0077
1030.35	0.0461	415.745	0.083	414.692	0.0077
1031.34	0.04612	415.9	0.0832	414.841	0.00768
1032.3	0.04613	416.052	0.08289	414.991	0.00772
1033.26	0.04613	416.208	0.08318	415.142	0.00769
1034.22	0.04614	416.36	0.08352	415.29	0.00769
1035.17	0.04615	416.51	0.08351	415.438	0.0077
1036.13	0.04616	416.659	0.08313	415.587	0.00771
1037.09	0.04616	416.81	0.08343	415.736	0.00773
1038.05	0.04617	416.962	0.08344	415.884	0.00769
1039.01	0.04618	417.112	0.08362	416.033	0.00767
1039.97	0.04619	417.262	0.08346	416.181	0.0077
1040.93	0.04619	417.414	0.08325	416.33	0.00771
1041.89	0.0462	417.568	0.08301	416.478	0.00772
1042.85	0.04621	417.717	0.08297	416.626	0.00769
1043.81	0.04621	417.867	0.08292	416.774	0.00774
1044.77	0.04622	418.02	0.08296	416.922	0.00768
1045.73	0.04622	418.172	0.08314	417.072	0.00765
1046.72	0.04623	418.322	0.08303	417.221	0.00771
1047.68	0.04623	418.472	0.08309	417.369	0.00765
1048.65	0.04624	418.628	0.08368	417.517	0.00763
1049.61	0.04624	418.779	0.08342	417.665	0.0077
1050.57	0.04625	418.932	0.08312	417.814	0.00772
1051.53	0.04625	419.09	0.0835	417.962	0.00771
1052.48	0.04626	419.242	0.08371	418.111	0.0077
1053.46	0.04626	419.396	0.08337	418.26	0.00773
1054.41	0.04627	419.548	0.08342	418.407	0.00771
1055.37	0.04627	419.702	0.08297	418.555	0.00772
1056.33	0.04628	419.854	0.08321	418.703	0.00771
1057.29	0.04628	420.008	0.08348	418.85	0.00772
1058.25	0.04629	420.158	0.08358	418.998	0.00771
1059.21	0.04629	420.312	0.08343	419.147	0.00773
1060.17	0.0463	420.464	0.08392	419.296	0.00771
1061.13	0.0463	420.618	0.08275	419.444	0.00774
1062.12	0.04631	420.768	0.08328	419.592	0.00776
1063.08	0.04631	420.92	0.08297	419.741	0.00773
1064.04	0.04631	421.07	0.083	419.894	0.00774
1064.99	0.04632	421.224	0.0834	420.042	0.00774
1065.95	0.04632	421.375	0.08333	420.19	0.00773
1066.91	0.04632	421.527	0.08351	420.34	0.00771
1067.88	0.04633	421.679	0.0834	420.489	0.00772
1068.84	0.04633	421.832	0.083	420.641	0.00772
1069.8	0.04634	421.982	0.08292	420.788	0.00771
1070.76	0.04634	422.131	0.08298	420.94	0.00773
1071.72	0.04635	422.285	0.08306	421.087	0.0077
1072.68	0.04635	422.442	0.08363	421.235	0.00773
1073.64	0.04636	422.59	0.08389	421.382	0.00773
1074.6	0.04637	422.74	0.08332	421.53	0.00771
1075.56	0.04637	422.89	0.08344	421.682	0.00771
1076.52	0.04638	423.04	0.08342	421.832	0.0077
1077.52	0.04639	423.192	0.08366	421.982	0.00773
1078.48	0.04639	423.342	0.08378	422.13	0.00774
1079.44	0.0464	423.492	0.08391	422.28	0.00772
1080.4	0.04641	423.642	0.08374	422.428	0.00779
1081.36	0.04642	423.792	0.08398	422.574	0.00772
1082.32	0.04643	423.948	0.08313	422.725	0.00774
1083.28	0.04644	424.102	0.08317	422.872	0.00773
1084.24	0.04645	424.252	0.08285	423.02	0.0078
1085.2	0.04646	424.406	0.08377	423.168	0.00772
1086.16	0.04647	424.558	0.08369	423.317	0.00773
1087.12	0.04648	424.712	0.08361	423.466	0.00774
1088.08	0.0465	424.862	0.08353	423.615	0.00775
1089.04	0.04651	425.012	0.08362	423.762	0.00774
1089.99	0.04652	425.163	0.08335	423.91	0.00772
1090.95	0.04653	425.315	0.08334	424.059	0.00775
1091.91	0.04654	425.47	0.0833	424.208	0.00774
1092.91	0.04655	425.62	0.08354	424.36	0.00773
1093.87	0.04656	425.77	0.08329	424.51	0.00774
1094.82	0.04657	425.92	0.08347	424.659	0.00774
1095.78	0.04658	426.07	0.08341	424.809	0.00774
1096.75	0.04659	426.22	0.08349	424.957	0.00778
1097.71	0.0466	426.372	0.08374	425.106	0.00773
1098.67	0.04661	426.522	0.08361	425.254	0.0077
1099.63	0.04662	426.672	0.08378	425.404	0.00772
1100.59	0.04664	426.824	0.08363	425.554	0.00771
1101.55	0.04665	426.974	0.08366	425.707	0.00775
1102.51	0.04666	427.132	0.08306	425.854	0.00774
1103.47	0.04667	427.286	0.08341	426.005	0.0077
1104.43	0.04668	427.438	0.08343	426.152	0.0077
1105.39	0.04669	427.588	0.08348	426.3	0.00777
1106.35	0.04671	427.748	0.08333	426.45	0.00773
1107.32	0.04672	427.899	0.08322	426.6	0.00773
1108.31	0.04673	428.057	0.08353	426.749	0.00774
1109.27	0.04674	428.21	0.08322	426.901	0.00772
1110.23	0.04675	428.395	0.08345	427.05	0.00772
1111.19	0.04676	428.545	0.0834	427.204	0.00771
1112.14	0.04677	428.698	0.08323	427.352	0.00772
1113.11	0.04678	428.849	0.08325	427.501	0.00775
1114.07	0.04679	429.004	0.08343	427.652	0.0077
1115.03	0.0468	429.155	0.08338	427.8	0.00776
1115.98	0.04681	429.31	0.08344	427.952	0.00772
1116.94	0.04682	429.463	0.08324	428.1	0.00775
1117.9	0.04683	429.613	0.08341	428.287	0.00772
1118.86	0.04684	429.766	0.08327	428.438	0.00774
1119.82	0.04684	429.92	0.08348	428.586	0.00776
1120.78	0.04685	430.07	0.08343	428.737	0.00777
1121.74	0.04686	430.22	0.08348	428.886	0.00774
1122.71	0.04687	430.37	0.08344	429.035	0.00774
1123.7	0.04687	430.522	0.08344	429.182	0.00777
1124.66	0.04688	430.672	0.0839	429.33	0.00776
1125.62	0.04688	430.833	0.08297	429.478	0.00776
1126.58	0.04689	430.982	0.08295	429.626	0.00779
1127.54	0.04689	431.132	0.083	429.774	0.00773
1128.5	0.0469	431.282	0.08316	429.922	0.00774
1129.46	0.0469	431.432	0.08283	430.07	0.00775
1130.42	0.04691	431.582	0.08295	430.22	0.00773
1131.38	0.04691	431.732	0.08301	430.371	0.00775
1132.34	0.04692	431.882	0.08319	430.52	0.00775
1133.31	0.04692	432.032	0.08295	430.67	0.00777
1134.27	0.04693	432.186	0.08363	430.824	0.00774
1135.22	0.04693	432.336	0.08353	430.972	0.00777
1136.18	0.04694	432.486	0.08365	431.12	0.00776
1137.14	0.04694	432.638	0.08377	431.268	0.00772
1138.1	0.04695	432.791	0.08373	431.417	0.00777
1139.09	0.04696	432.942	0.08358	431.57	0.00772
1140.06	0.04696	433.092	0.08367	431.72	0.00777
1141.02	0.04697	433.245	0.08331	431.87	0.00776
1141.97	0.04698	433.4	0.0833	432.018	0.00772
1142.94	0.04699	433.551	0.08353	432.166	0.00776
1143.9	0.047	433.702	0.08342	432.319	0.00775
1144.86	0.04701	433.852	0.08358	432.47	0.00773
1145.82	0.04701	434.002	0.08367	432.618	0.00775
1146.78	0.04702	434.151	0.08347	432.766	0.00776
1147.74	0.04703	434.301	0.0837	432.915	0.00775
1148.7	0.04704	434.45	0.08351	433.064	0.00778
1149.66	0.04705	434.6	0.08339	433.218	0.00776
1150.62	0.04706	434.75	0.08341	433.368	0.00774
1151.58	0.04706	434.9	0.08336	433.517	0.00778
1152.54	0.04707	435.05	0.0835	433.667	0.00775
1153.5	0.04708	435.204	0.08369	433.816	0.00776
1154.5	0.04709	435.354	0.08358	433.964	0.00778
1155.46	0.0471	435.508	0.08374	434.112	0.00776
1156.42	0.04711	435.658	0.0838	434.261	0.00774
1157.38	0.04712	435.808	0.08353	434.41	0.00777
1158.35	0.04712	435.958	0.08369	434.559	0.00775
1159.3	0.04713	436.108	0.08336	434.712	0.00778
1160.26	0.04714	436.262	0.08302	434.862	0.00777
1161.22	0.04715	436.415	0.08314	435.012	0.00776
1162.18	0.04715	436.565	0.08351	435.161	0.00777
1163.14	0.04716	436.716	0.08342	435.31	0.00777
1164.11	0.04717	436.868	0.08354	435.459	0.00775
1165.07	0.04717	437.022	0.08361	435.608	0.00778
1166.03	0.04718	437.172	0.08389	435.758	0.00776
1166.99	0.04719	437.325	0.08367	435.91	0.00777
1167.94	0.04719	437.48	0.08339	436.067	0.00777
1168.9	0.0472	437.63	0.08313	436.216	0.00778
1169.9	0.04721	437.78	0.08335	436.364	0.00781
1170.86	0.04721	437.93	0.08302	436.514	0.00779
1171.82	0.04722	438.08	0.08336	436.662	0.0078
1172.78	0.04723	438.23	0.08337	436.81	0.00778
1173.74	0.04723	438.382	0.08325	436.96	0.00779
1174.7	0.04724	438.532	0.08354	437.108	0.00776
1175.66	0.04724	438.682	0.08334	437.256	0.00781
1176.62	0.04724	438.832	0.0834	437.405	0.00777
1177.58	0.04725	438.982	0.0834	437.555	0.00773
1178.54	0.04725	439.132	0.08332	437.704	0.00776
1179.5	0.04725	439.282	0.08343	437.853	0.00776
1180.46	0.04726	439.432	0.08337	438.001	0.00775
1181.42	0.04726	439.585	0.08352	438.153	0.0078
1182.38	0.04726	439.736	0.0836	438.305	0.00775
1183.35	0.04726	439.888	0.08367	438.456	0.00776
1184.31	0.04726	440.038	0.08382	438.607	0.00779
1185.3	0.04726	440.188	0.08395	438.758	0.00775
1186.85	0.04727	440.337	0.08361	438.908	0.00779
1187.81	0.04727	440.49	0.08351	439.056	0.00779
1188.77	0.04727	440.64	0.08377	439.207	0.00776
1189.73	0.04728	440.792	0.08303	439.356	0.00778
1190.69	0.04729	440.944	0.08333	439.506	0.00776
1191.65	0.04729	441.095	0.08299	439.655	0.00774
1192.61	0.0473	441.249	0.0833	439.802	0.00779
1193.57	0.0473	441.402	0.08398	439.95	0.00779
1194.53	0.04731	441.552	0.08388	440.1	0.00779
1195.49	0.04731	441.702	0.08374	440.25	0.0078
1196.45	0.04732	441.853	0.08371	440.4	0.00779
1197.42	0.04733	442.004	0.08357	440.55	0.00779
1198.38	0.04733	442.154	0.08373	440.7	0.0078
1199.34	0.04734	442.309	0.08317	440.852	0.00778
1200.34	0.04735	442.462	0.08325	441.003	0.00777
1201.3	0.04736	442.616	0.08386	441.151	0.00778
1202.26	0.04737	442.767	0.08367	441.305	0.00775
1203.22	0.04737	442.918	0.08401	441.458	0.0078
1204.18	0.04738	443.072	0.08372	441.612	0.00776
1205.14	0.04738	443.222	0.08353	441.76	0.00778
1206.1	0.04739	443.37	0.08359	441.911	0.00776
1207.06	0.0474	443.552	0.084	442.06	0.00778
1208.02	0.0474	443.702	0.08391	442.212	0.00779
1208.98	0.04741	443.852	0.08381	442.36	0.00778
1209.94	0.04742	444.004	0.08401	442.513	0.0078
1210.9	0.04742	444.155	0.08368	442.662	0.00779
1211.86	0.04743	444.305	0.08344	442.81	0.00779
1212.82	0.04744	444.456	0.08332	442.96	0.00777
1213.79	0.04744	444.606	0.08359	443.109	0.00779
1214.74	0.04745	444.755	0.08352	443.259	0.00777
1215.74	0.04745	444.907	0.08342	443.443	0.00777
1216.7	0.04746	445.058	0.08285	443.592	0.0078
1217.66	0.04747	445.21	0.08345	443.742	0.00777
1218.62	0.04748	445.36	0.08327	443.892	0.00781
1219.58	0.04748	445.514	0.08357	444.04	0.00776
1220.54	0.04749	445.666	0.08364	444.19	0.00773
1221.5	0.0475	445.816	0.08379	444.337	0.00779
1222.46	0.04751	445.968	0.08364	444.49	0.00775
1223.42	0.04751	446.118	0.08405	444.645	0.0078
1224.38	0.04752	446.268	0.08392	444.798	0.0078
1225.34	0.04752	446.417	0.08415	444.947	0.00778
1226.3	0.04753	446.568	0.08401	445.1	0.00782
1227.26	0.04753	446.72	0.08355	445.25	0.00779
1228.22	0.04754	446.87	0.08377	445.399	0.0078
1229.18	0.04755	447.022	0.08356	445.55	0.00782
1230.15	0.04756	447.177	0.08345	445.698	0.0078
1231.14	0.04756	447.33	0.08359	445.85	0.00781
1232.11	0.04756	447.482	0.08382	446	0.00782
1233.07	0.04756	447.632	0.08373	446.153	0.00781
1234.03	0.04757	447.782	0.08403	446.302	0.00781
1234.99	0.04757	447.932	0.08383	446.452	0.00779
1235.95	0.04757	448.083	0.08418	446.6	0.00778
1236.91	0.04757	448.235	0.08361	446.749	0.00781
1237.88	0.04757	448.385	0.08367	446.901	0.0078
1238.83	0.04758	448.535	0.08384	447.052	0.00779
1239.8	0.04758	448.69	0.08346	447.202	0.00779
1240.75	0.04758	448.842	0.08374	447.355	0.00779
1241.72	0.04758	448.992	0.08354	447.503	0.00781
1242.68	0.04759	449.142	0.08355	447.655	0.00779
1243.63	0.04759	449.293	0.08351	447.802	0.0078
1244.6	0.04759	449.444	0.08344	447.952	0.00781
1245.56	0.0476	449.593	0.08343	448.103	0.00778
1246.55	0.0476	449.744	0.08359	448.257	0.0078
1247.51	0.0476	449.894	0.08326	448.406	0.00778
1248.47	0.04761	450.047	0.08379	448.556	0.00782
1249.43	0.04761	450.2	0.08385	448.704	0.0078
1250.39	0.04761	450.352	0.08383	448.855	0.00779
1251.36	0.04762	450.502	0.08384	449.004	0.00782
1252.32	0.04762	450.652	0.08365	449.154	0.0078
1253.28	0.04762	450.802	0.08381	449.302	0.0078
1254.24	0.04763	450.956	0.0837	449.452	0.00781
1255.2	0.04763	451.11	0.08377	449.6	0.00783
1256.17	0.04763	451.264	0.08383	449.752	0.00781
1257.12	0.04764	451.415	0.08368	449.905	0.00781
1258.08	0.04764	451.565	0.08365	450.052	0.00779
1259.05	0.04765	451.72	0.08386	450.2	0.00779
1260.01	0.04765	451.87	0.08378	450.355	0.00784
1260.97	0.04766	452.02	0.08383	450.502	0.00779
1261.96	0.04767	452.172	0.08359	450.653	0.00779
1262.92	0.04768	452.323	0.08347	450.802	0.00781
1263.88	0.04768	452.477	0.08351	450.951	0.00781
1264.84	0.04769	452.628	0.08377	451.103	0.0078
1265.8	0.04769	452.778	0.08361	451.252	0.00781
1266.76	0.04769	452.928	0.08367	451.4	0.00781
1267.72	0.0477	453.078	0.08368	451.555	0.0078
1268.68	0.0477	453.23	0.08362	451.702	0.00782
1269.64	0.04771	453.38	0.08364	451.85	0.00777
1270.6	0.04771	453.532	0.0836	451.999	0.0078
1271.56	0.04772	453.688	0.08365	452.149	0.00782
1272.52	0.04772	453.84	0.08351	452.297	0.00779
1273.48	0.04773	453.99	0.08361	452.446	0.00781
1274.45	0.04774	454.14	0.08356	452.595	0.0078
1275.41	0.04774	454.29	0.08356	452.748	0.0078
1276.37	0.04775	454.444	0.0835	452.898	0.0078
1277.36	0.04775	454.594	0.08376	453.05	0.0078
1278.32	0.04776	454.747	0.08368	453.201	0.0078
1279.28	0.04776	454.9	0.08378	453.35	0.00779
1280.24	0.04777	455.05	0.08361	453.498	0.0078
1281.2	0.04777	455.2	0.08375	453.651	0.0078
1282.16	0.04778	455.35	0.08385	453.799	0.00783
1283.12	0.04778	455.502	0.08361	453.95	0.00778
1284.09	0.04779	455.652	0.08399	454.099	0.00782
1285.05	0.0478	455.802	0.08351	454.253	0.00779
1286.01	0.0478	455.952	0.08372	454.403	0.00781
1286.97	0.0478	456.104	0.08361	454.552	0.00782
1287.93	0.0478	456.253	0.08365	454.7	0.0078
1288.89	0.0478	456.404	0.08367	454.85	0.00782
1289.85	0.04781	456.554	0.08363	454.998	0.0078
1290.81	0.04781	456.707	0.08354	455.147	0.00779
1291.77	0.04781	456.855	0.08358	455.295	0.00782
1292.77	0.04781	457.007	0.08367	455.442	0.00782
1293.73	0.04782	457.158	0.08348	455.593	0.00784
1294.69	0.04782	457.308	0.0836	455.743	0.00783
1295.65	0.04782	457.458	0.08323	455.892	0.00783
1296.61	0.04782	457.613	0.08372	456.045	0.00779
1297.57	0.04783	457.773	0.08328	456.195	0.00782
1298.53	0.04783	457.922	0.08347	456.342	0.0078
1299.49	0.04783	458.072	0.08316	456.49	0.00779
1300.45	0.04783	458.224	0.08357	456.642	0.00785
1301.41	0.04783	458.376	0.08359	456.79	0.00779
1302.37	0.04783	458.528	0.0838	456.944	0.00782
1303.34	0.04784	458.711	0.08387	457.092	0.00783
1304.3	0.04784	458.863	0.08396	457.242	0.00783
1305.26	0.04784	459.013	0.08405	457.39	0.00782
1306.22	0.04784	459.164	0.08407	457.542	0.00782
1307.18	0.04784	459.314	0.08414	457.693	0.00782
1308.17	0.04784	459.467	0.08382	457.841	0.00783
1309.13	0.04784	459.617	0.08386	457.99	0.00783
1310.09	0.04784	459.767	0.08374	458.141	0.0078
1311.06	0.04785	459.922	0.08356	458.295	0.00784
1312.02	0.04785	460.072	0.08337	458.475	0.00782
1312.98	0.04785	460.225	0.08355	458.624	0.00781
1313.94	0.04785	460.38	0.08413	458.774	0.00787
1314.9	0.04785	460.532	0.08394	458.924	0.00785
1315.86	0.04786	460.682	0.08384	459.073	0.00786
1316.82	0.04786	460.832	0.08412	459.222	0.00786
1317.78	0.04786	460.983	0.08395	459.37	0.00782
1318.74	0.04786	461.135	0.08368	459.52	0.00781
1319.71	0.04786	461.285	0.08383	459.675	0.00785
1320.67	0.04786	461.437	0.08331	459.822	0.00781
1321.63	0.04785	461.588	0.08332	459.975	0.00782
1322.59	0.04785	461.738	0.08342	460.124	0.00782
1323.58	0.04785	461.888	0.08326	460.272	0.00785
1324.54	0.04785	462.038	0.08343	460.422	0.00785
1325.5	0.04785	462.188	0.0834	460.571	0.00781
1326.46	0.04785	462.34	0.08347	460.72	0.00782
1327.42	0.04785	462.49	0.08347	460.876	0.00783
1328.38	0.04785	462.642	0.08373	461.025	0.00781
1329.34	0.04785	462.793	0.08388	461.175	0.00781
1330.3	0.04785	462.942	0.08396	461.326	0.00779
1331.27	0.04785	463.092	0.08387	461.474	0.00781
1332.23	0.04785	463.242	0.08401	461.622	0.00785
1333.19	0.04785	463.392	0.08391	461.77	0.00783
1334.15	0.04785	463.542	0.08396	461.92	0.00781
1335.12	0.04785	463.692	0.08396	462.07	0.00783
1336.08	0.04785	463.846	0.08393	462.22	0.00778
1337.04	0.04785	464.008	0.08368	462.375	0.00783
1338	0.04785	464.162	0.08393	462.522	0.00784
1338.99	0.04785	464.321	0.08368	462.67	0.0078
1339.95	0.04785	464.473	0.08362	462.818	0.00782
1340.91	0.04785	464.628	0.08393	462.968	0.0078
1341.87	0.04785	464.78	0.08407	463.116	0.00778
1342.83	0.04785	464.93	0.08398	463.267	0.00782
1343.79	0.04785	465.08	0.08408	463.416	0.00779
1344.76	0.04785	465.23	0.08395	463.567	0.0078
1345.71	0.04785	465.385	0.08326	463.717	0.00779
1346.67	0.04785	465.54	0.08362	463.865	0.0078
1347.64	0.04785	465.69	0.08381	464.014	0.00778
1348.6	0.04785	465.84	0.0836	464.165	0.0078
1349.56	0.04785	465.99	0.08389	464.312	0.00778
1350.52	0.04785	466.141	0.08368	464.465	0.00776
1351.48	0.04785	466.294	0.08414	464.612	0.0078
1352.44	0.04785	466.455	0.08385	464.759	0.00779
1353.44	0.04785	466.608	0.08387	464.91	0.00779
1354.43	0.04785	466.762	0.08392	465.062	0.00779
1355.39	0.04785	466.914	0.08412	465.215	0.00777
1356.36	0.04785	467.065	0.08407	465.365	0.00781
1357.32	0.04785	467.214	0.08391	465.513	0.0078
1358.28	0.04785	467.366	0.0838	465.662	0.00779
1359.24	0.04785	467.518	0.08385	465.81	0.0078
1360.2	0.04785	467.668	0.08338	465.96	0.00782
1361.16	0.04785	467.817	0.08381	466.113	0.00778
1362.13	0.04785	467.97	0.08356	466.263	0.00782
1363.09	0.04785	468.123	0.0839	466.41	0.0078
1364.05	0.04785	468.273	0.08361	466.561	0.0078
1365.01	0.04785	468.425	0.08382	466.71	0.00782
1365.97	0.04785	468.588	0.08367	466.858	0.0078
1366.93	0.04785	468.74	0.0836	467.008	0.00782
1367.89	0.04785	468.894	0.08428	467.161	0.00782
1368.85	0.04785	469.044	0.0841	467.32	0.00782
1369.85	0.04785	469.193	0.08413	467.47	0.00783
1370.8	0.04785	469.345	0.08413	467.618	0.00784
1371.77	0.04785	469.497	0.08374	467.767	0.00783
1372.73	0.04785	469.651	0.08374	467.919	0.00783
1373.68	0.04785	469.805	0.08394	468.069	0.00781
1374.65	0.04785	469.956	0.08384	468.217	0.00784
1375.61	0.04785	470.106	0.08377	468.365	0.00784
1376.57	0.04785	470.269	0.08367	468.512	0.00786
1377.53	0.04785	470.422	0.08395	468.664	0.00783
1378.5	0.04785	470.573	0.08381	468.812	0.00781
1379.46	0.04785	470.724	0.08396	468.965	0.00782
1380.42	0.04785	470.875	0.0838	469.15	0.00782
1381.38	0.04785	471.028	0.08387	469.303	0.00798
1382.34	0.04785	471.182	0.08375	469.452	0.00786
1383.3	0.04785	471.332	0.08388	469.602	0.00784
1384.26	0.04785	471.483	0.08368	469.752	0.00783
1385.26	0.04785	471.635	0.08376	469.902	0.00794
1386.22	0.04785	471.786	0.08376	470.05	0.00778
1387.18	0.04785	471.936	0.08386	470.199	0.0078
1388.15	0.04785	472.092	0.08383	470.349	0.00785
1389.11	0.04785	472.242	0.0838	470.497	0.00782
1390.07	0.04785	472.395	0.08406	470.647	0.0078
1391.03	0.04785	472.545	0.08381	470.796	0.00787
1391.99	0.04785	472.698	0.08399	470.945	0.00778
1392.95	0.04785	472.846	0.08371	471.092	0.00781
1393.91	0.04785	472.996	0.08383	471.242	0.0078
1394.87	0.04785	473.146	0.08385	471.391	0.00781
1395.83	0.04785	473.3	0.08393	471.543	0.00781
1396.79	0.04785	473.45	0.08378	471.695	0.00784
1397.75	0.04785	473.6	0.08366	471.842	0.00782
1398.72	0.04785	473.788	0.08378	471.992	0.00784
1399.68	0.04785	473.939	0.08373	472.145	0.00784
1400.67	0.04785	474.09	0.08396	472.292	0.00782
1401.64	0.04785	474.242	0.08394	472.44	0.00783
1402.6	0.04785	474.397	0.08395	472.59	0.00784
1403.56	0.04785	474.552	0.08393	472.742	0.00779
1404.52	0.04785	474.705	0.0838	472.892	0.00796
1405.49	0.04785	474.855	0.08382	473.045	0.00779
1406.45	0.04785	475.006	0.08391	473.192	0.00783
1407.41	0.04785	475.158	0.08374	473.34	0.00783
1408.37	0.04785	475.31	0.0841	473.489	0.00782
1409.34	0.04785	475.46	0.08402	473.676	0.00781
1410.29	0.04784	475.614	0.0841	473.825	0.0078
1411.25	0.04784	475.764	0.08376	473.972	0.00787
1412.21	0.04789	475.919	0.08363	474.122	0.00783
1413.17	0.04785	476.07	0.08386	474.272	0.00786
1414.13	0.04785	476.22	0.08385	474.423	0.00786
1415.09	0.04784	476.373	0.08407	474.574	0.00786
1416.09	0.04784	476.525	0.08429	474.722	0.00785
1417.05	0.04785	476.674	0.08409	474.87	0.00784
1418.01	0.04785	476.825	0.08415	475.021	0.00787
1418.97	0.04784	476.979	0.08401	475.174	0.0078
1419.93	0.04784	477.136	0.08405	475.323	0.00788
1420.89	0.04787	477.288	0.08371	475.476	0.00784
1421.85	0.04785	477.44	0.08407	475.629	0.00783
1422.82	0.04786	477.592	0.08382	475.779	0.00786
1423.78	0.04782	477.743	0.08391	475.927	0.00784
1424.74	0.04785	477.894	0.08435	476.08	0.00786
1425.7	0.04784	478.044	0.08405	476.234	0.00786
1426.66	0.04784	478.194	0.0843	476.384	0.00784
1427.62	0.04789	478.345	0.08428	476.532	0.00788
1428.58	0.04785	478.495	0.08401	476.682	0.00786
1429.54	0.04784	478.645	0.08389	476.83	0.00784
1430.5	0.04784	478.795	0.08405	476.979	0.00787
1431.5	0.04789	478.947	0.08347	477.133	0.00783
1432.46	0.04785	479.098	0.08399	477.28	0.00785
1433.42	0.04786	479.247	0.08342	477.431	0.00786
1434.38	0.04782	479.4	0.08372	477.58	0.00783
1435.35	0.04785	479.55	0.0836	477.728	0.00783
1436.31	0.04784	479.702	0.08369	477.876	0.00784
1437.27	0.04784	479.854	0.08372	478.025	0.00783
1438.22	0.04789	480.003	0.08355	478.175	0.00781
1439.19	0.04785	480.157	0.08394	478.322	0.00786
1440.15	0.04784	480.31	0.08404	478.47	0.00784
1441.11	0.04784	480.46	0.08423	478.618	0.00785
1442.06	0.04789	480.61	0.08392	478.772	0.00786
1443.03	0.04785	480.76	0.08396	478.923	0.00782
1443.99	0.04785	480.91	0.08377	479.072	0.00785
1444.94	0.04784	481.06	0.08403	479.222	0.00782
1445.91	0.04784	481.212	0.08381	479.37	0.00783
1446.9	0.04785	481.364	0.08373	479.521	0.00786
1447.87	0.04785	481.518	0.08369	479.67	0.00784
1448.83	0.04784	481.67	0.08358	479.819	0.00781
1449.79	0.04784	481.82	0.08364	479.97	0.00784
1450.75	0.04787	481.97	0.08345	480.119	0.00785
1451.71	0.04785	482.12	0.08388	480.27	0.00784
1452.67	0.04786	482.27	0.08369	480.419	0.00787
1453.63	0.04782	482.424	0.08426	480.568	0.00786
1454.6	0.04785	482.575	0.08425	480.718	0.00787
1455.56	0.04784	482.73	0.08392	480.87	0.00784
1456.52	0.04784	482.88	0.08377	481.018	0.00786
1457.48	0.04789	483.035	0.08391	481.167	0.00787
1458.44	0.04785	483.188	0.08398	481.318	0.00785
1459.4	0.04784	483.339	0.0842	481.467	0.00787
1460.36	0.04784	483.49	0.08426	481.616	0.00784
1461.33	0.04789	483.64	0.0842	481.764	0.00781
1462.32	0.04785	483.79	0.08397	481.912	0.00783
1463.28	0.04786	483.942	0.08403	482.06	0.00785
1464.25	0.04782	484.094	0.08402	482.209	0.00782
1465.21	0.04785	484.245	0.08413	482.36	0.00782
1466.17	0.04784	484.395	0.08415	482.507	0.00783
1467.13	0.04784	484.548	0.08377	482.656	0.00786
1468.1	0.04789	484.698	0.08383	482.805	0.00782
1469.06	0.04785	484.85	0.08331	482.957	0.00785
1470.02	0.04784	485.002	0.08382	483.107	0.0078
1470.99	0.04784	485.152	0.08382	483.257	0.0078
1471.95	0.04789	485.304	0.08397	483.406	0.00786
1472.91	0.04785	485.458	0.08404	483.56	0.00779
1473.88	0.04785	485.61	0.08424	483.708	0.00784
1474.83	0.04784	485.76	0.0842	483.859	0.00784
1475.8	0.04784	485.91	0.0841	484.009	0.00783
1476.76	0.04785	486.06	0.08427	484.158	0.00784
1477.75	0.04785	486.21	0.08421	484.31	0.00785
1478.72	0.04784	486.36	0.08432	484.459	0.00784
1479.68	0.04784	486.512	0.08377	484.61	0.00784
1480.64	0.04787	486.662	0.08439	484.76	0.00784
1481.6	0.04785	486.812	0.08351	484.908	0.00781
1482.56	0.04786	486.964	0.08388	485.063	0.00785
1483.53	0.04782	487.114	0.08346	485.217	0.00783
1484.49	0.04785	487.265	0.08364	485.368	0.00786
1485.45	0.04784	487.42	0.08388	485.516	0.00783
1486.41	0.04784	487.57	0.08411	485.664	0.00787
1487.38	0.04789	487.722	0.08415	485.812	0.00785
1488.34	0.04785	487.874	0.08415	485.963	0.00784
1489.3	0.04784	488.028	0.08389	486.11	0.00785
1490.27	0.04784	488.177	0.08384	486.26	0.00784
1491.23	0.04789	488.332	0.0838	486.408	0.00783
1492.19	0.04785	488.487	0.08389	486.556	0.00782
1493.19	0.04786	488.638	0.08396	486.704	0.00784
1494.15	0.04782	488.823	0.08443	486.855	0.00784
1495.11	0.04785	488.972	0.08407	487.003	0.00785
1496.07	0.04784	489.125	0.08424	487.152	0.00785
1497.03	0.04784	489.275	0.08415	487.301	0.00781
1497.99	0.04789	489.43	0.08377	487.451	0.00785
1498.95	0.04785	489.581	0.08385	487.6	0.00785
1499.92	0.04784	489.744	0.08399	487.752	0.00783
1500.88	0.04784	489.895	0.08368	487.901	0.00783
1501.85	0.04789	490.046	0.08316	488.05	0.00786
1502.81	0.04785	490.196	0.08386	488.205	0.00785
1503.77	0.01961	490.348	0.08395	488.357	0.00783
1504.73	0.01277	490.5	0.08375	488.505	0.00783
1505.69	0.01048	490.652	0.08395	488.654	0.00782
1506.65	0.00911	490.802	0.08375	488.836	0.00784
1507.62	0.0081	490.952	0.08403	488.988	0.00782
1508.61	0.00734	491.102	0.08399	489.137	0.00781
1509.57	0.00669	491.252	0.08398	489.287	0.00783
1510.54	0.00612	491.405	0.08435	489.437	0.00779
1511.5	0.00569	491.555	0.08422	489.588	0.0078
1512.46	0.00524	491.706	0.08445	489.739	0.00781
1513.42	0.00491	491.857	0.08392	489.889	0.00782
1514.38	0.00459	492.01	0.08406	490.037	0.00783
1515.34	0.00431	492.162	0.08389	490.187	0.00782
1516.3	0.00405	492.315	0.08369	490.336	0.00781
1517.27	0.00382	492.513	0.08394	490.485	0.00787
1518.22	0.00345	492.664	0.08377	490.632	0.00785
1519.19	0.00336	492.814	0.08385	490.782	0.0078
1520.15	0.00322	492.968	0.08412	490.93	0.00785
1521.11	0.00309	493.118	0.0844	491.081	0.00784
1522.07	0.00298	493.268	0.08409	491.23	0.0078
1523.04	0.00284	493.42	0.08442	491.381	0.00783
1524.03	0.00271	493.57	0.08443	491.534	0.00786
1525	0.0026	493.722	0.0841	491.683	0.00786
1525.96	0.00251	493.872	0.08404	491.832	0.0078
1526.92	0.00243	494.022	0.08416	491.982	0.0078
1527.88	0.00227	494.172	0.08406	492.132	0.0078
1528.85	0.00223	494.323	0.08424	492.282	0.00781
1529.81	0.00216	494.474	0.08401	492.432	0.00779
1530.77	0.00209	494.625	0.08431	492.581	0.00781
1531.73	0.00202	494.78	0.08352	492.73	0.00783
1532.7	0.00198	494.932	0.08408	492.885	0.00787
1533.66	0.00191	495.082	0.0839	493.034	0.00786
1534.62	0.00189	495.232	0.08402	493.184	0.00784
1535.58	0.00183	495.385	0.08406	493.336	0.00783
1536.54	0.00177	495.542	0.08438	493.484	0.00784
1537.5	0.0018	495.696	0.08361	493.634	0.00784
1538.46	0.00171	495.848	0.08384	493.782	0.00785
1539.46	0.0017	496	0.08377	493.932	0.00781
1540.42	0.00165	496.15	0.08396	494.082	0.00782
1541.38	0.00164	496.302	0.08408	494.23	0.0078
1542.35	0.00158	496.452	0.08416	494.379	0.00783
1543.31	0.00158	496.602	0.08408	494.529	0.00779
1544.27	0.00155	496.757	0.0842	494.68	0.0078
1545.23	0.00151	496.91	0.08361	494.831	0.0078
1546.19	0.00151	497.062	0.08376	494.982	0.00781
1547.15	0.0015	497.213	0.08364	495.133	0.00781
1548.12	0.00145	497.366	0.0838	495.283	0.00779
1549.08	0.00143	497.518	0.08393	495.432	0.00782
1550.04	0.00143	497.67	0.08429	495.58	0.00782
1551	0.00143	497.822	0.08419	495.731	0.00781
1551.96	0.00121	497.975	0.08392	495.881	0.00784
1552.92	0.00206	498.125	0.08379	496.031	0.0078
1553.89	0.00175	498.278	0.0839	496.181	0.00784
1554.88	0.00132	498.432	0.08396	496.334	0.00783
1555.84	0.00132	498.582	0.08408	496.482	0.00785
1556.81	0.00131	498.732	0.08396	496.632	0.00785
1557.77	0.00132	498.881	0.0839	496.783	0.00782
1558.73	0.00135	499.035	0.08443	496.93	0.00781
1559.69	0.0013	499.188	0.08405	497.08	0.00785
1560.66	0.00132	499.34	0.08409	497.229	0.00785
1561.62	0.00131	499.49	0.08391	497.377	0.00782
1562.58	0.00139	499.643	0.08415	497.526	0.00784
1563.54	0.00135	499.793	0.08374	497.676	0.00782
1564.51	0.00128	499.945	0.08394	497.824	0.0078
1565.47	0.00135	500.095	0.0835	497.972	0.00784
1566.43	0.00135	500.248	0.08382	498.12	0.00783
1567.39	0.00121	500.4	0.08396	498.268	0.00784
1568.35	0.00115	500.552	0.08427	498.417	0.00785
1569.32	0.00128	500.702	0.08414	498.568	0.00783
1570.31	0.00126	500.857	0.08417	498.717	0.00781
1571.27	0.00126	501.012	0.08371	498.868	0.00783
1572.24	0.00135	501.163	0.08403	499.023	0.00781
1573.2	0.00131	501.313	0.0837	499.175	0.00781
1574.16	0.00124	501.466	0.08425	499.325	0.00782
1575.13	0.00137	501.62	0.08435	499.472	0.00782
1576.09	0.00132	501.772	0.08448	499.624	0.00784
1577.05	0.00131	501.926	0.08357	499.772	0.00781
1578.01	0.00135	502.078	0.0837	499.921	0.00785
1578.97	0.00134	502.229	0.08384	500.07	0.00783
1579.94	0.00135	502.384	0.08448	500.224	0.0078
1580.9	0.00138	502.535	0.08424	500.372	0.00784
1581.86	0.00138	502.686	0.08429	500.521	0.00785
1582.82	0.00138	502.844	0.0837	500.669	0.00783
1583.78	0.00143	502.995	0.08356	500.82	0.00784
1584.74	0.00137	503.15	0.08441	500.974	0.00783
1585.74	0.00142	503.3	0.08442	501.124	0.00781
1586.7	0.00138	503.452	0.08432	501.275	0.00784
1587.66	0.00141	503.604	0.08421	501.424	0.00781
1588.63	0.0014	503.754	0.08395	501.574	0.00781
1589.59	0.00141	503.905	0.08435	501.722	0.00784
1590.55	0.00145	504.09	0.08405	501.872	0.00783
1591.52	0.00142	504.242	0.08383	502.02	0.00783
1592.48	0.00145	504.392	0.08391	502.17	0.00789
1593.44	0.00148	504.545	0.08388	502.319	0.0078
1594.4	0.00142	504.696	0.08417	502.47	0.0078
1595.37	0.00143	504.848	0.08398	502.629	0.0079
1596.33	0.00147	504.998	0.08428	502.777	0.00784
1597.29	0.00148	505.15	0.08448	502.926	0.00784
1598.25	0.00151	505.302	0.08456	503.077	0.00782
1599.21	0.00152	505.454	0.08417	503.23	0.00788
1600.18	0.00147	505.605	0.08406	503.38	0.00784
1601.17	0.00154	505.757	0.08393	503.533	0.00783
1602.13	0.00153	505.91	0.08392	503.684	0.00784
1603.1	0.00151	506.064	0.08411	503.832	0.00781
1604.06	0.00155	506.219	0.08433	504.015	0.00784
1605.02	0.00158	506.375	0.08374	504.162	0.00786
1605.98	0.00153	506.524	0.08364	504.312	0.00783
1606.94	0.00156	506.676	0.08361	504.462	0.00782
1607.91	0.00159	506.829	0.08396	504.612	0.00785
1608.87	0.00153	506.985	0.08391	504.762	0.00783
1609.83	0.00138	507.148	0.08388	504.914	0.00783
1610.79	0.00141	507.3	0.08428	505.065	0.00788
1611.76	0.00147	507.451	0.08433	505.214	0.00785
1612.72	0.00161	507.602	0.08435	505.364	0.00786
1613.68	0.00153	507.752	0.08415	505.513	0.00783
1614.64	0.00155	507.904	0.08408	505.663	0.00784
1615.6	0.0016	508.06	0.08388	505.813	0.00785
1616.59	0.00162	508.212	0.0837	505.96	0.00781
1617.56	0.00155	508.362	0.08394	506.111	0.00784
1618.52	0.00165	508.515	0.0846	506.262	0.00782
1619.48	0.00158	508.67	0.0841	506.414	0.00788
1620.44	0.00169	508.822	0.08404	506.562	0.00786
1621.4	0.00166	508.975	0.08343	506.713	0.00783
1622.37	0.00161	509.13	0.08422	506.862	0.00783
1623.33	0.00169	509.28	0.08438	507.014	0.00786
1624.29	0.00162	509.432	0.08429	507.165	0.00786
1625.26	0.00167	509.582	0.08421	507.314	0.00785
1626.22	0.00173	509.734	0.08449	507.462	0.00786
1627.18	0.00165	509.89	0.08382	507.614	0.00787
1628.14	0.00163	510.041	0.08386	507.764	0.00785
1629.1	0.00177	510.194	0.08383	507.916	0.00781
1630.07	0.00168	510.345	0.08407	508.065	0.00787
1631.03	0.00176	510.496	0.08405	508.217	0.00786
1632.03	0.00173	510.652	0.08447	508.37	0.00781
1632.99	0.00259	510.803	0.08413	508.52	0.00785
1633.95	0.00299	510.958	0.08412	508.67	0.00781
1634.91	0.0019	511.108	0.08383	508.822	0.00786
1635.88	0.00179	511.26	0.08407	508.972	0.00783
		511.412	0.084	509.12	0.00783
		511.567	0.08447	509.27	0.00782
		511.724	0.08366	509.42	0.00784
		511.875	0.08397	509.572	0.00783
		512.03	0.08417	509.72	0.00786
		512.182	0.08448	509.868	0.00783
		512.335	0.08407	510.022	0.00785
		512.489	0.08378	510.17	0.00784
		512.644	0.08429	510.322	0.00784
		512.795	0.08434	510.47	0.00786
		512.948	0.08413	510.621	0.00788
		513.102	0.084	510.77	0.00784
		513.254	0.08375	510.92	0.00784
		513.406	0.08369	511.07	0.00785
		513.56	0.08421	511.225	0.00784
		513.71	0.08407	511.374	0.00786
		513.862	0.08401	511.524	0.00785
		514.016	0.08438	511.674	0.00785
		514.17	0.0838	511.825	0.00786
		514.324	0.08391	511.976	0.00784
		514.48	0.08408	512.126	0.00785
		514.632	0.08435	512.274	0.00786
		514.784	0.08418	512.424	0.00784
		514.934	0.08408	512.577	0.00786
		515.087	0.08414	512.726	0.00785
		515.242	0.08391	512.876	0.00784
		515.393	0.08418	513.024	0.00788
		515.547	0.08411	513.175	0.00786
		515.702	0.08443	513.324	0.00786
		515.852	0.0837	513.472	0.00786
		516.004	0.08395	513.623	0.00784
		516.16	0.08409	513.772	0.00784
		516.312	0.08425	513.922	0.00786
		516.468	0.08428	514.07	0.00785
		516.623	0.08389	514.22	0.00786
		516.777	0.08405	514.372	0.00785
		516.934	0.08403	514.52	0.00786
		517.088	0.08406	514.671	0.00784
		517.24	0.0841	514.82	0.00783
		517.392	0.08391	514.973	0.00786
		517.544	0.08418	515.12	0.00785
		517.695	0.0844	515.27	0.00784
		517.847	0.08417	515.421	0.00783
		518	0.08422	515.57	0.00785
		518.154	0.08415	515.72	0.00783
		518.306	0.08385	515.872	0.00788
		518.461	0.08414	516.02	0.00785
		518.618	0.08443	516.17	0.0078
		518.77	0.08372	516.321	0.00785
		518.925	0.08432	516.47	0.00782
		519.078	0.08397	516.624	0.00787
		519.264	0.08434	516.773	0.00786
		519.414	0.08424	516.922	0.00785
		519.565	0.0845	517.072	0.00786
		519.716	0.08408	517.222	0.00787
		519.87	0.0836	517.372	0.00786
		520.022	0.08346	517.522	0.00785
		520.173	0.08403	517.671	0.00786
		520.326	0.08415	517.82	0.00784
		520.48	0.08418	517.971	0.00784
		520.633	0.08426	518.12	0.00783
		520.786	0.0838	518.27	0.00779
		520.942	0.08386	518.421	0.00786
		521.094	0.08433	518.571	0.00783
		521.248	0.08408	518.721	0.00783
		521.402	0.08393	518.87	0.00784
		521.554	0.08367	519.053	0.00785
		521.709	0.08405	519.202	0.00786
		521.86	0.08434	519.352	0.00787
		522.014	0.08427	519.502	0.00786
		522.168	0.08418	519.654	0.00784
		522.322	0.084	519.804	0.00786
		522.475	0.08426	519.955	0.00783
		522.628	0.08447	520.107	0.00788
		522.785	0.08422	520.258	0.00785
		522.935	0.08352	520.407	0.00788
		523.086	0.08358	520.56	0.00785
		523.238	0.0839	520.72	0.00786
		523.39	0.08411	520.87	0.00784
		523.544	0.08417	521.019	0.00784
		523.694	0.08431	521.172	0.00783
		523.845	0.08409	521.323	0.00784
		524	0.08411	521.472	0.00784
		524.154	0.08408	521.627	0.00785
		524.305	0.08378	521.778	0.00784
		524.458	0.08401	521.93	0.00784
		524.608	0.08408	522.08	0.00786
		524.759	0.08417	522.235	0.00787
		524.91	0.08427	522.382	0.00787
		525.062	0.0845	522.532	0.00787
		525.214	0.08405	522.682	0.00787
		525.366	0.08413	522.833	0.00784
		525.518	0.08422	522.985	0.0079
		525.67	0.08424	523.134	0.00786
		525.822	0.08384	523.285	0.00788
		525.972	0.08414	523.435	0.00788
		526.124	0.08411	523.584	0.00788
		526.278	0.08445	523.735	0.00785
		526.432	0.08398	523.886	0.00791
		526.585	0.08435	524.038	0.0079
		526.74	0.08399	524.192	0.00789
		526.895	0.08414	524.342	0.00786
		527.048	0.08401	524.492	0.00786
		527.202	0.08397	524.642	0.00787
		527.365	0.08408	524.792	0.00786
		527.516	0.08401	524.942	0.00788
		527.669	0.08414	525.093	0.00788
		527.824	0.08403	525.242	0.00786
		527.975	0.08431	525.392	0.00784
		528.125	0.08411	525.542	0.00789
		528.276	0.08458	525.694	0.00788
		528.428	0.08406	525.844	0.00789
		528.58	0.08423	525.995	0.00785
		528.732	0.08431	526.145	0.00786
		528.883	0.08425	526.296	0.00786
		529.033	0.08422	526.446	0.00787
		529.185	0.08416	526.595	0.00789
		529.337	0.08401	526.744	0.00785
		529.49	0.08417	526.897	0.00786
		529.641	0.0843	527.049	0.00785
		529.792	0.08421	527.2	0.00788
		529.942	0.08415	527.354	0.00788
		530.092	0.08429	527.502	0.00788
		530.244	0.08419	527.652	0.00786
		530.394	0.08391	527.805	0.00788
		530.548	0.08447	527.955	0.00786
		530.702	0.0839	528.106	0.00786
		530.854	0.0842	528.258	0.00787
		531.005	0.08386	528.411	0.00786
		531.158	0.08416	528.565	0.00784
		531.308	0.08405	528.715	0.00783
		531.46	0.08421	528.865	0.00788
		531.614	0.08406	529.014	0.00786
		531.767	0.08396	529.162	0.00784
		531.918	0.08402	529.313	0.00786
		532.07	0.0843	529.463	0.00783
		532.223	0.08393	529.613	0.00787
		532.374	0.08423	529.766	0.00787
		532.526	0.08412	529.914	0.00785
		532.678	0.08416	530.064	0.00784
		532.83	0.0841	530.214	0.00788
		532.982	0.08442	530.364	0.00781
		533.134	0.08415	530.515	0.00789
		533.288	0.08392	530.668	0.00784
		533.443	0.08387	530.82	0.00789
		533.594	0.08419	530.97	0.00789
		533.747	0.08408	531.121	0.00786
		533.9	0.08424	531.272	0.00793
		534.055	0.08409	531.422	0.0079
		534.21	0.08409	531.576	0.00787
		534.395	0.08435	531.727	0.00788
		534.547	0.08419	531.879	0.00786
		534.698	0.084	532.03	0.00788
		534.85	0.0843	532.18	0.00789
		535.003	0.08389	532.335	0.00786
		535.153	0.08403	532.485	0.00785
		535.306	0.08413	532.636	0.00787
		535.462	0.08444	532.786	0.00787
		535.613	0.084	532.936	0.00787
		535.765	0.08399	533.084	0.00786
		535.922	0.08363	533.234	0.00784
		536.072	0.08404	533.387	0.00786
		536.223	0.08399	533.537	0.00788
		536.378	0.08426	533.688	0.00789
		536.534	0.08392	533.843	0.00785
		536.69	0.08425	533.997	0.00786
		536.842	0.0844	534.149	0.00784
		536.998	0.084	534.335	0.00788
		537.155	0.08393	534.484	0.00784
		537.306	0.08401	534.635	0.00786
		537.462	0.08443	534.785	0.00783
		537.625	0.08417	534.936	0.00784
		537.778	0.08454	535.086	0.00786
		537.93	0.08419	535.236	0.00785
		538.08	0.08396	535.391	0.00787
		538.232	0.08373	535.542	0.00785
		538.388	0.08373	535.692	0.00787
		538.54	0.08399	535.84	0.00786
		538.704	0.08393	535.994	0.00785
		538.854	0.08443	536.147	0.0078
		539.01	0.08407	536.298	0.00786
		539.162	0.08452	536.446	0.00782
		539.314	0.08395	536.596	0.00787
		539.465	0.08396	536.747	0.00782
		539.617	0.08357	536.897	0.00782
		539.77	0.08392	537.047	0.00785
		539.922	0.08401	537.198	0.00782
		540.072	0.08434	537.348	0.00783
		540.225	0.08406	537.499	0.00783
		540.379	0.08442	537.65	0.00782
		540.534	0.08369	537.804	0.00786
		540.688	0.08409	537.954	0.00785
		540.84	0.08406	538.105	0.00784
		540.993	0.08457	538.254	0.00789
		541.144	0.08398	538.404	0.00787
		541.296	0.08423	538.555	0.00787
		541.45	0.08388	538.705	0.00785
		541.602	0.08391	538.854	0.00781
		541.752	0.08386	539.005	0.00785
		541.902	0.08411	539.155	0.00784
		542.054	0.08425	539.307	0.00783
		542.207	0.08418	539.458	0.00786
		542.37	0.0843	539.609	0.00786
		542.525	0.08432	539.76	0.00785
		542.677	0.08442	539.91	0.00784
		542.828	0.08416	540.062	0.00783
		542.983	0.08397	540.212	0.00784
		543.139	0.08408	540.363	0.00784
		543.293	0.08454	540.512	0.00784
		543.445	0.08406	540.662	0.00785
		543.597	0.08381	540.813	0.00783
		543.75	0.08387	540.967	0.00787
		543.902	0.08376	541.117	0.00787
		544.058	0.08434	541.265	0.0079
		544.21	0.08409	541.415	0.00787
		544.362	0.08407	541.568	0.00786
		544.514	0.08407	541.722	0.00786
		544.667	0.08414	541.873	0.00784
		544.822	0.08454	542.022	0.00787
		544.974	0.08432	542.173	0.00786
		545.127	0.08444	542.322	0.00783
		545.282	0.08379	542.472	0.00787
		545.44	0.08415	542.622	0.00785
		545.592	0.08447	542.772	0.00784
		545.747	0.08386	542.922	0.00788
		545.898	0.08379	543.07	0.00784
		546.05	0.08389	543.22	0.00784
		546.202	0.08381	543.374	0.00787
		546.353	0.084	543.524	0.00786
		546.512	0.08419	543.675	0.00787
		546.665	0.08401	543.825	0.00787
		546.817	0.08373	543.975	0.00786
		546.969	0.08412	544.125	0.00787
		547.122	0.08448	544.274	0.00787
		547.276	0.08415	544.425	0.00786
		547.428	0.08435	544.575	0.00789
		547.58	0.08395	544.724	0.00786
		547.738	0.08448	544.878	0.00785
		547.891	0.08411	545.029	0.00783
		548.048	0.08375	545.182	0.00785
		548.2	0.08402	545.337	0.00785
		548.355	0.08404	545.487	0.00786
		548.506	0.08419	545.637	0.00785
		548.658	0.08424	545.788	0.00786
		548.815	0.08396	545.939	0.00786
		548.972	0.08406	546.092	0.00786
		549.128	0.08425	546.242	0.00784
		549.282	0.08384	546.393	0.00785
		549.468	0.08404	546.542	0.00787
		549.622	0.08451	546.692	0.00783
		549.777	0.08416	546.842	0.00788
		549.93	0.08408	546.99	0.00783
		550.085	0.08384	547.142	0.00786
		550.235	0.0846	547.292	0.00786
		550.385	0.08418	547.445	0.00787
		550.538	0.08424	547.595	0.00786
		550.687	0.08441	547.744	0.00785
		550.842	0.08435	547.898	0.00784
		550.993	0.08434	548.048	0.00783
		551.147	0.08359	548.198	0.00783
		551.298	0.08394	548.349	0.00783
		551.459	0.08413	548.502	0.00786
		551.61	0.08411	548.652	0.00786
		551.76	0.08401	548.802	0.00787
		551.91	0.08401	548.952	0.00785
		552.062	0.08395	549.102	0.00788
		552.215	0.08377	549.252	0.00787
		552.366	0.08398	549.438	0.00785
		552.517	0.08395	549.588	0.0079
		552.67	0.08403	549.742	0.00781
		552.82	0.08413	549.89	0.00785
		552.972	0.08427	550.04	0.00786
		553.122	0.08456	550.195	0.00783
		553.274	0.08428	550.344	0.00787
		553.428	0.08389	550.495	0.00786
		553.58	0.08369	550.644	0.00785
		553.732	0.08387	550.796	0.00786
		553.882	0.08399	550.947	0.00786
		554.032	0.08385	551.1	0.00788
		554.186	0.08422	551.25	0.00785
		554.336	0.08434	551.399	0.00784
		554.487	0.08442	551.549	0.00785
		554.637	0.08446	551.698	0.00784
		554.792	0.08409	551.848	0.00782
		554.944	0.08411	551.999	0.00784
		555.095	0.08398	552.148	0.00782
		555.246	0.08396	552.301	0.00781
		555.4	0.08403	552.451	0.00789
		555.578	0.08374	552.603	0.00786
		555.73	0.08407	552.756	0.00787
		555.882	0.08386	552.91	0.00787
		556.033	0.08398	553.062	0.00787
		556.183	0.08402	553.211	0.00791
		556.338	0.08434	553.36	0.00786
		556.492	0.08402	553.51	0.00787
		556.648	0.08406	553.66	0.00788
		556.8	0.08391	553.815	0.00786
		556.95	0.08408	553.964	0.00786
		557.1	0.08412	554.115	0.00789
[truncated: 629 more rows]

## Sheet: DC galvanostatic curves, light
	3D		2D-3D passivation		2D-3D segregation		2D
1.482	-0.000846519	1.482	0.000395883	1.455	0.00166	8.188	0.000506976
2.437	-0.000534085	2.443	0.000380204	2.416	0.00146	9.146	0.000482481
3.393	-0.000226292	3.4	0.000379283	3.378	0.00208	10.105	0.000530308
4.348	-0.000514037	4.358	0.000361506	4.336	0.0015	11.059	0.000510824
5.302	-3.9899e-05	5.315	0.000407053	5.296	0.00141	12.016	0.000512755
6.271	-0.000691949	6.272	0.000358544	6.254	0.00143	12.971	0.00054529
7.227	-0.000527498	7.23	0.000375121	7.211	0.00142	13.929	0.000523989
8.182	-0.00111	8.188	0.00035362	8.17	0.00154	14.888	0.000498407
9.137	-0.01036	9.144	0.00042916	9.125	0.00157	15.848	0.000576442
10.093	-0.00479	10.1	0.000374382	10.083	0.00141	16.838	0.000511346
11.049	-0.00219	11.056	0.000390053	11.038	0.00129	17.798	0.000487065
12.006	-0.00259	12.014	0.000357135	11.994	0.00137	18.755	0.000458138
12.965	-0.00146	12.97	0.000378388	12.951	0.00137	19.712	0.000548802
13.922	-0.00156	13.932	0.000370578	13.908	0.00138	20.668	0.000498646
14.878	-0.00126	14.888	0.000338064	14.865	0.00126	21.623	0.000416224
15.834	-0.00156	15.844	0.000403209	15.821	0.00131	22.579	0.000520787
16.824	-0.00143	16.835	0.000343062	16.812	0.00132	23.535	0.000521121
17.781	-0.00133	17.792	0.000441609	17.77	0.00126	24.493	0.000495975
18.739	-0.000370937	18.749	0.000319975	18.726	-0.00214	25.45	0.000514801
19.696	-0.00104	19.708	0.000364594	19.686	-0.000256147	26.405	0.000513785
20.652	-0.000780637	20.667	0.000368893	20.644	0.000215956	27.36	0.000559657
21.61	-0.00107	21.625	0.000359985	21.602	0.00036789	28.316	0.000416389
22.568	-0.00106	22.582	0.000389788	22.558	0.000602064	29.276	0.000556867
23.524	-0.0013	23.54	0.000386433	23.517	0.000639177	30.231	0.000422259
24.48	-0.000557039	24.498	0.000378331	24.474	0.000606571	31.189	0.000361435
25.44	-0.00128	25.454	0.000273792	25.431	0.000606571	32.178	0.000429695
26.396	-0.000575438	26.41	0.000438095	26.389	0.000796648	33.138	0.000511449
27.352	-0.000997288	27.367	0.000530753	27.344	0.000810202	34.095	0.000453131
28.307	-0.000600046	28.328	0.00023109	28.3	0.000924466	35.05	0.000387471
29.267	-0.000207003	29.284	0.000310254	29.256	0.00097329	36.006	0.000370638
30.223	-0.000637445	30.238	0.000542577	30.216	0.000926743	36.968	0.000441115
31.179	-1.75068e-05	31.195	0.000382225	31.172	0.000932047	37.929	0.00044668
32.17	-0.00068956	32.184	0.000448371	32.16	0.000881819	38.885	0.000568621
33.127	-0.000304127	33.146	0.00038451	33.118	0.000927302	39.842	0.000447838
34.084	-0.000791316	34.106	0.000458382	34.074	0.00106	40.798	0.00054888
35.039	-0.00087607	35.065	0.000379523	35.035	0.000959179	41.754	0.00055496
35.997	-0.000889332	36.02	0.000424879	35.993	0.001	42.71	0.000516164
36.952	-0.00075549	36.978	0.000398685	36.948	0.000603017	43.668	0.000535648
37.91	-0.000427331	37.934	0.000476463	37.905	0.00097477	44.624	0.000337427
38.865	-0.000697781	38.891	0.000359149	38.862	0.000965274	45.582	0.000475176
39.823	-0.000173434	39.848	0.000432114	39.82	0.00101	46.54	0.000475176
40.778	-0.000408401	40.806	0.000377001	40.777	0.000977201	47.535	0.000366538
41.736	-0.000714167	41.764	0.000447366	41.736	0.001	48.49	0.000423195
42.692	-0.000397033	42.722	0.000377612	42.697	0.000947907	49.451	0.000404041
43.652	-0.000315878	43.68	0.000444975	43.656	0.00103	50.408	0.000367992
44.607	-0.000408544	44.636	0.000419615	44.614	0.000960593	51.365	0.000475176
45.565	-0.000516594	45.597	0.000367649	45.57	0.000999897	52.326	0.000468044
46.524	-0.000420739	46.554	0.000395003	46.525	0.000964842	53.283	0.000413887
47.514	-0.000347901	47.545	0.000396776	47.516	0.00105	54.24	0.000458925
48.47	-0.000413351	48.501	0.000437077	48.474	0.00101	55.198	0.000456595
49.427	-0.000144932	49.459	0.000346893	49.435	0.00107	56.158	0.000456564
50.383	-0.000269282	50.42	0.000392743	50.392	0.000941762	57.115	0.000494855
51.345	-0.000347123	51.378	0.000378185	51.35	0.000951845	58.071	0.00048055
52.304	-0.000450973	52.334	0.000432195	52.322	0.00097329	59.029	0.00048055
53.262	-0.000314022	53.292	0.000361843	53.28	0.000926743	59.986	0.000356762
54.223	-4.58761e-05	54.25	0.000428273	54.242	0.000932047	60.942	0.000348158
55.179	-0.000254922	55.208	0.000374539	55.198	0.000881819	61.902	0.000335376
56.135	-0.000681079	56.167	0.000408547	56.156	0.000927302	62.892	0.000551121
57.09	-0.000393721	57.125	0.000361296	57.114	0.00106	63.846	0.000492206
58.046	-0.000200974	58.082	0.000372437	58.071	0.000959179	64.8	0.000393312
59.005	-0.00075302	59.042	0.000383199	59.028	0.001	65.756	0.000368087
59.964	-0.000115674	60	0.00039532	59.986	0.000603017	66.713	0.000498312
60.92	-0.000492923	60.956	0.000382525	60.945	0.00097477	67.67	0.000498312
61.879	-8.96686e-05	61.914	0.000379789	61.902	0.000965274	68.63	0.000521827
62.869	-0.000504914	62.904	0.000415775	62.893	0.00101	69.586	0.000498312
63.827	4.31322e-05	63.86	0.000389718	63.848	0.000977201	70.541	0.000346763
64.783	-0.000893249	64.815	0.000369103	64.805	0.001	71.5	0.000526684
65.741	0.000541905	65.772	0.000375408	65.766	0.000947907	72.459	0.000437596
66.697	-0.00128	66.728	0.000396607	66.725	0.00103	73.416	0.000492284
67.655	0.000512602	67.684	0.000381182	67.681	0.000960593	74.371	0.000492284
68.611	-0.000890852	68.642	0.000369532	68.643	0.000999897	75.329	0.000435583
69.57	-9.11013e-05	69.598	0.000358572	69.6	0.000964842	76.29	0.000490091
70.526	3.70285e-05	70.555	0.000388264	70.555	0.00105	77.246	0.000444977
71.484	-0.000258117	71.512	0.00038503	71.512	0.00101	78.236	0.000453827
72.444	1.52128e-05	72.472	0.000371186	72.469	0.00107	79.192	0.000441286
73.4	-0.000343053	73.43	0.000331212	73.428	0.000941762	80.152	0.000431997
74.36	-0.000732223	74.385	0.000405819	74.382	0.000951845	81.11	0.000356214
75.32	0.000267719	75.344	0.000362459	75.338	0.00097329	82.068	0.000356214
76.276	-2.1635e-05	76.3	0.000369335	76.296	0.000926743	83.024	0.000409567
77.236	8.63154e-05	77.257	0.000353871	77.252	0.000932047	83.98	0.000467913
78.228	-0.00018233	78.247	0.000392955	78.242	0.000881819	84.94	0.000467913
79.183	-0.00013308	79.205	0.000345159	79.199	0.000927302	85.9	0.000498855
80.137	-0.000421861	80.16	0.000391134	80.155	0.00106	86.856	0.000439063
81.093	-2.33107e-05	81.118	0.000319903	81.114	0.000959179	87.813	0.000413306
82.052	-0.000332464	82.075	0.000374057	82.072	0.001	88.769	0.00048739
83.007	-0.000253914	83.032	0.000380551	83.031	0.000603017	89.729	0.000454741
83.963	-0.000285584	83.988	0.000338981	83.988	0.00097477	90.688	0.000427265
84.925	0.00015797	84.944	0.000391131	84.948	0.000965274	91.65	0.000439063
85.88	-5.42793e-05	85.9	0.000383965	85.909	0.00101	92.608	0.000416856
86.839	-0.000142929	86.855	0.000368285	86.865	0.000977201	93.599	0.000467913
87.794	-0.000432978	87.812	0.000367362	87.822	0.001	94.558	0.00040055
88.75	0.00010578	88.768	0.000349585	88.779	0.000947907	95.512	0.000497608
89.707	0.000117022	89.725	0.00039513	89.738	0.00103	96.469	0.000517673
90.664	-0.000117935	90.682	0.000346622	90.696	0.000960593	97.43	0.000454371
91.621	0.000301515	91.64	0.000363202	91.652	0.000999897	98.388	0.000473444
92.577	7.91695e-05	92.597	0.000341706	92.608	0.000964842	99.348	0.000333636
93.566	0.000383016	93.592	0.000417246	93.599	0.00105	100.305	0.000460713
94.523	0.000266566	94.553	0.000362466	94.556	0.00101	101.262	0.000467398
95.481	0.000536852	95.51	0.000378137	95.513	0.00107	102.218	0.000475636
96.437	0.000160994	96.467	0.000345219	96.469	0.000941762	103.174	0.000497883
97.392	-0.000446864	97.424	0.000366469	97.431	0.000951845	104.135	0.000338905
98.353	0.000268182	98.384	0.000358659	98.388	0.00097329	105.09	0.000349467
99.31	9.59328e-05	99.34	0.000326147	99.348	0.000926743	106.048	0.000516289
100.27	0.000238379	100.302	0.000391289	100.303	0.000932047	107.004	0.000456922
101.229	-8.3887e-05	101.26	0.00033113	101.264	0.000881819	107.962	0.000323431
102.187	0.000175868	101.527	0.000429676	102.224	0.000927302	108.954	0.000376933
103.143	2.12097e-05	101.674	0.000308043	103.18	0.00106	109.915	0.000565522
104.102	5.23643e-05	101.82	0.000352659	104.138	0.000959179	110.872	0.000599663
105.058	-1.65018e-05	101.965	0.00035696	105.096	0.001	111.828	0.00046839
106.019	-5.66596e-05	102.112	0.00034805	106.056	0.000603017	112.783	0.000471704
106.976	0.000181583	102.259	0.000377884	107.016	0.00097477	113.741	0.000431077
107.932	4.41206e-05	102.405	0.000374529	107.975	0.000965274	114.701	0.000512736
108.925	7.16669e-05	102.55	0.000366426	108.965	0.00101	115.658	0.000476377
109.882	8.70173e-05	102.698	0.000261885	109.921	0.000977201	116.615	0.000572579
110.838	0.000268936	102.844	0.000426189	110.878	0.001	117.569	0.000462501
111.794	4.69903e-05	102.99	0.000518847	111.84	0.000947907	118.526	0.000343053
112.749	0.000131032	103.138	0.000219188	112.796	0.00103	119.483	0.000358074
113.705	0.000408722	103.284	0.000298351	113.754	0.000960593	120.439	0.000390666
114.66	0.000445377	103.43	0.000530674	114.713	0.000999897	121.395	0.000503366
115.615	0.000215119	103.577	0.000370323	115.672	0.000964842	122.353	0.000596826
116.573	-0.000239435	103.727	0.000436466	116.629	0.00105	123.312	0.000368826
117.527	0.000619216	103.878	0.000372603	117.588	0.00101	124.3	0.00036974
118.484	5.49449e-07	104.024	0.000446472	118.545	0.00107	125.258	0.000374191
119.443	0.000603692	104.168	0.000367577	119.502	0.000941762	126.216	0.00050854
120.397	0.000351526	104.316	0.000412932	120.458	0.000951845	127.171	0.000507992
121.356	-6.18364e-05	104.462	0.000386739	121.417	0.00097329	128.128	0.000368135
122.311	0.00044681	104.607	0.000464515	122.372	0.000926743	129.085	0.000498763
123.266	0.00034106	104.758	0.000347198	123.328	0.000932047	130.045	0.000391405
124.255	0.000141607	104.903	0.000420161	124.322	0.000881819	131.002	0.000383067
125.21	1.91529e-05	105.05	0.00036504	125.282	0.000927302	131.962	0.000438993
126.166	0.000305459	105.195	0.000435406	126.24	0.00106	132.918	0.000477498
127.124	0.000203297	105.342	0.000365652	127.201	0.000959179	133.874	0.000370042
128.08	-0.000224144	105.488	0.000433012	128.156	0.001	134.831	0.000413068
129.039	0.000267606	105.634	0.000407653	129.117	0.000603017	135.786	0.00049433
129.996	0.00024764	105.784	0.000355688	130.072	0.00097477	136.741	0.000512426
130.95	0.000323782	105.93	0.000383043	131.028	0.000965274	137.699	0.00041868
131.909	0.000196133	106.078	0.000384815	131.985	0.00101	138.656	0.000326841
132.864	0.000704991	106.227	0.000425115	132.94	0.000977201	139.646	0.000346296
133.824	0.000313125	106.372	0.000334923	133.897	0.001	140.604	0.000470822
134.782	7.3155e-05	106.52	0.000380776	134.855	0.000947907	141.56	0.000477474
135.738	4.88931e-05	106.668	0.000366218	135.81	0.00103	142.517	0.000478666
136.697	0.000465035	106.815	0.000420228	136.768	0.000960593	143.477	0.000475104
137.654	0.000258869	106.96	0.000349879	137.723	0.000999897	144.437	0.000384324
138.608	0.000159324	107.112	0.000416307	138.681	0.000964842	145.394	0.000523012
139.598	-0.00025253	107.26	0.000362576	139.671	0.00105	146.352	0.000413792
140.556	0.000519625	107.405	0.000396584	140.628	0.00101	147.314	0.000363247
141.51	0.000539535	107.552	0.000349335	141.588	0.00107	148.274	0.000493901
142.466	0.000223785	107.701	0.000360478	142.546	0.000941762	149.23	0.000469391
143.424	0.000700436	107.884	0.000371239	143.503	0.000951845	150.188	0.000487631
144.381	0.000177982	108.035	0.000383355	144.458	0.00097329	151.146	0.000364344
145.338	2.40323e-05	108.18	0.00037056	145.414	0.000926743	152.104	0.000390124
146.294	0.000418979	108.33	0.000367827	146.37	0.000932047	153.063	0.000442855
147.25	0.000480125	108.478	0.000403812	147.327	0.000881819	154.02	0.000462477
148.209	0.000674067	108.625	0.000377756	148.284	0.000927302	155.013	0.000483172
149.167	0.000281901	108.775	0.00035714	149.238	0.00106	155.968	0.000399526
150.124	0.000658051	108.921	0.000363444	150.196	0.000959179	156.926	0.000408118
151.08	0.000570094	109.07	0.000384646	151.153	0.001	157.884	0.000364058
152.038	0.000918344	109.215	0.000369229	152.114	0.000603017	158.84	0.000455945
152.994	-5.12221e-05	109.363	0.000357574	153.071	0.00097477	159.797	0.000509947
153.948	0.000639324	109.51	0.000346616	154.027	0.000965274	160.758	0.000362055
154.94	0.000452954	109.658	0.000376308	155.018	0.00101	161.715	0.000419896
155.898	0.000549604	109.804	0.000373069	155.978	0.000977201	162.673	0.000450675
156.855	0.000368406	109.95	0.000359225	156.935	0.001	163.63	0.000529855
157.814	0.000198057	110.099	0.00031925	157.892	0.000947907	164.589	0.000358956
158.772	0.000951303	110.247	0.00039384	158.849	0.00103	165.548	0.000356238
159.729	0.000355349	110.395	0.000350479	159.805	0.000960593	166.506	0.000487869
160.689	0.000833496	110.54	0.000357349	160.761	0.000999897	167.462	0.000442879
161.65	0.000304742	110.686	0.000341881	161.718	0.000964842	168.42	0.000478785
162.608	0.000865092	110.831	0.000380966	162.674	0.00105	169.382	0.000382352
163.563	4.34388e-05	110.977	0.000333169	163.631	0.00101	170.375	0.000390213
164.523	0.000739185	111.122	0.000379145	164.586	0.00107	171.332	0.000498598
165.482	4.26396e-05	111.27	0.000307913	165.544	0.000941762	172.292	0.000409906
166.44	0.000635686	111.42	0.000362067	166.501	0.000951845	173.249	0.000460592
167.4	4.78363e-05	111.566	0.000368561	167.464	0.00097329	174.207	0.000404255
168.356	0.00091457	111.712	0.000326987	168.425	0.000926743	175.17	0.000512927
169.312	0.000131517	111.86	0.000379136	169.382	0.000932047	176.128	0.000442045
170.304	0.00121	112.006	0.000371966	170.373	0.000881819	177.09	0.000361054
171.261	-1.63868e-05	112.152	0.000356287	171.331	0.000927302	178.048	0.000403683
172.218	0.000814532	112.298	0.000355364	172.286	0.00106	179.004	0.000405638
173.173	0.000442674	112.444	0.000337586	173.242	0.000959179	179.961	0.000414722
174.134	0.000808516	112.59	0.000383132	174.202	0.001	180.919	0.000320356
175.09	0.000136275	112.736	0.000334622	175.158	0.000603017	181.876	0.000316613
176.048	0.000915317	112.883	0.000351193	176.116	0.00097477	182.836	0.000414245
177.008	0.000728947	113.028	0.000329695	177.074	0.000965274	183.796	0.000531786
177.963	0.000147293	113.175	0.000405233	178.03	0.00101	184.753	0.000371687
178.921	0.000741743	113.32	0.000350452	178.992	0.000977201	185.744	0.000325673
179.878	0.000476677	113.465	0.000366119	179.952	0.001	186.701	0.000394003
180.835	0.000579824	113.616	0.0003332	180.91	0.000947907	187.659	0.000443451
181.793	0.000909658	113.764	0.00035445	181.868	0.00103	188.618	0.000566237
182.748	0.000175904	113.912	0.000346638	182.827	0.000960593	189.578	0.000357716
183.704	0.000877654	114.058	0.000314124	183.784	0.000999897	190.536	0.000312488
184.663	1.53964e-05	114.204	0.000379269	184.743	0.000964842	191.496	0.000454967
185.652	0.00121	114.349	0.000319124	185.734	0.00105	192.458	0.000404398
186.608	0.000447593	114.498	0.000417668	186.692	0.00101	193.415	0.000309055
187.566	0.000634207	114.642	0.000296036	187.651	0.00107	194.371	0.000313108
188.521	0.000278858	114.788	0.000340652	188.607	0.000941762	195.33	0.000443428
189.48	0.000579608	114.935	0.000344951	189.566	0.000951845	196.286	0.000532215
190.435	0.00041405	115.08	0.000336043	190.526	0.00097329	197.243	0.000427001
191.393	0.000650601	115.225	0.000365878	191.483	0.000926743	198.201	0.000310819
192.352	0.000531251	115.371	0.000362521	192.439	0.000932047	199.158	0.000311582
193.308	0.000590494	115.52	0.000354419	193.398	0.000881819	200.115	0.000402896
194.266	0.000581548	115.668	0.000249876	194.358	0.000927302	201.104	0.000495999
195.225	0.000818694	115.817	0.000414178	195.316	0.00106	202.06	0.000440543
196.186	0.000266537	115.962	0.000506832	196.273	0.000959179	203.023	0.000379849
197.146	0.00117	116.11	0.000207171	197.234	0.001	203.981	0.000387471
198.101	0.000244125	116.256	0.000286334	198.192	0.000603017	204.939	0.000405233
199.058	0.000843371	116.402	0.000518651	199.152	0.00097477	205.898	0.000555079
200.014	0.000366818	116.548	0.000358295	200.112	0.000965274	206.856	0.000416176
201.005	0.000888668	116.694	0.000424438	201.102	0.00101	207.814	0.000328295
201.962	0.000618302	116.845	0.000360575	202.061	0.000977201	208.77	0.00034117
202.919	0.000327904	116.99	0.000434445	203.023	0.001	209.728	0.000494092
203.876	0.000815842	117.135	0.000355582	203.981	0.000947907	210.685	0.000433304
204.838	0.000468092	117.283	0.000400929	204.942	0.00103	211.643	0.00034806
205.797	0.00083003	117.427	0.000374734	205.898	0.000960593	212.6	0.000347488
206.754	0.000398177	117.574	0.000452514	206.857	0.000999897	213.56	0.000303762
207.713	0.000977623	117.72	0.000335197	207.816	0.000964842	214.518	0.000343292
208.672	0.000524469	117.868	0.00040816	208.778	0.00105	215.48	0.000428538
209.628	0.00087052	118.014	0.000353044	209.739	0.00101	216.476	0.000339811
210.589	0.00055257	118.16	0.00042341	210.695	0.00107	217.434	0.000433938
211.547	0.000589608	118.305	0.000353657	211.652	0.000941762	218.396	0.000524919
212.503	0.000622163	118.452	0.000421019	212.615	0.000951845	219.354	0.000385182
213.46	0.000664205	118.6	0.000395659	213.572	0.00097329	220.311	0.000315611
214.42	0.00103	118.746	0.00034369	214.528	0.000926743	221.267	0.000417368
215.377	0.000440297	118.892	0.000371042	215.49	0.000932047	222.228	0.000418322
216.367	0.00156	119.037	0.000372815	216.481	0.000881819	223.186	0.000349205
217.325	-0.000176818	119.184	0.000413086	217.438	0.000927302	224.147	0.000282924
218.281	0.00146	119.334	0.000322899	218.394	0.00106	225.104	0.000415533
219.237	0.000605238	119.48	0.000368756	219.354	0.000959179	226.065	0.000453227
220.194	0.00106	119.627	0.000354195	220.315	0.001	227.022	0.000392239
221.151	0.000178023	119.775	0.000408206	221.275	0.000603017	227.978	0.000347893
222.107	0.00105	119.922	0.000337856	222.232	0.00097477	228.935	0.000285094
223.063	0.000670511	120.068	0.000404288	223.189	0.000965274	229.891	0.000370948
224.02	0.000477462	120.215	0.000350555	224.145	0.00101	230.853	0.000491302
224.978	0.000341912	120.363	0.000384558	225.102	0.000977201	231.843	0.00040447
225.934	0.00203	120.51	0.000337311	226.062	0.001	232.801	0.000326483
226.892	0.000264705	120.662	0.000348454	227.02	0.000947907	233.758	0.000365274
227.848	0.000358247	120.807	0.000359214	227.976	0.00103	234.719	0.000502699
228.805	0.000434097	120.954	0.000371332	228.934	0.000960593	235.677	0.000369041
229.762	0.00111	121.1	0.000358535	229.89	0.000999897	236.638	0.000319402
230.718	0.000933581	121.247	0.0003558	230.848	0.000964842	237.595	0.00039758
231.714	0.000334036	121.395	0.000391785	231.84	0.00105	238.555	0.000519912
232.67	0.00111	121.54	0.000365734	232.798	0.00101	239.511	0.000414436
233.626	0.000825284	121.686	0.00034512	233.757	0.00107	240.47	0.000390522
234.584	0.00119	121.833	0.000351419	234.718	0.000941762	241.43	0.000393455
235.54	0.000722681	121.98	0.00037262	235.675	0.000951845	242.388	0.000476544
236.5	0.000922631	122.127	0.000357201	236.631	0.00097329	243.345	0.000507562
237.458	0.000730586	122.273	0.000345547	237.588	0.000926743	244.302	0.000388567
238.414	0.000731128	122.417	0.000334588	238.548	0.000932047	245.264	0.000350023
239.372	0.00112	122.563	0.000364279	239.508	0.000881819	246.222	0.000529163
240.328	0.000886025	122.71	0.000361043	240.466	0.000927302	247.213	0.000501745
241.287	0.000555467	122.857	0.000347198	241.424	0.00106	248.173	0.000392954
242.244	0.000906513	123.04	0.000307221	242.38	0.000959179	249.132	0.000351596
243.2	0.00085916	123.187	0.000381831	243.338	0.001	250.09	0.000485413
244.157	0.00113	123.333	0.00033847	244.295	0.000603017	251.05	0.000474398
245.113	0.000479856	123.48	0.000345347	245.256	0.00097477	252.005	0.000398676
246.069	0.000648903	123.627	0.00032988	246.213	0.000965274	252.962	0.000407164
247.075	0.000981649	123.774	0.000368962	247.205	0.00101	253.917	0.000355125
248.031	0.000781691	123.92	0.000321168	248.162	0.000977201	254.877	0.000338976
248.988	0.000901793	124.066	0.000367137	249.118	0.001	255.84	0.000401263
249.945	0.000539544	124.215	0.000295904	250.074	0.000947907	256.796	0.000436203
250.902	0.000662694	124.362	0.000350058	251.03	0.00103	257.755	0.000418861
251.858	0.00123	124.51	0.000356549	251.987	0.000960593	258.715	0.000473039
252.815	0.00108	124.655	0.000314975	252.942	0.000999897	259.672	0.000483506
253.771	0.000417816	124.802	0.000367125	253.898	0.000964842	260.632	0.000331037
254.727	0.000937267	124.95	0.000359957	254.856	0.00105	261.594	0.000341845
255.684	0.000746317	125.096	0.000344277	255.814	0.00101	262.589	0.000354452
256.64	0.00105	125.244	0.000343354	256.771	0.00107	263.546	0.000443881
257.595	0.000382514	125.39	0.000325576	257.729	0.000941762	264.505	0.000445636
258.552	0.000713968	125.54	0.000371122	258.691	0.000951845	265.462	0.000492969
259.508	0.00106	125.688	0.000322611	259.648	0.00097477	266.422	0.000465577
260.464	0.000626669	125.836	0.000339185	260.605	0.000965274	267.381	0.000366275
261.419	0.000691911	125.982	0.000317688	261.567	0.00101	268.338	0.000330822
262.409	0.00105	126.129	0.000393228	262.561	0.000977201	269.295	0.000334518
263.366	0.000921008	126.278	0.000338446	263.518	0.001	270.25	0.000366275
264.321	0.000665622	126.424	0.000354116	264.476	0.000947907	271.207	0.000376823
265.278	0.000846869	126.572	0.000321198	265.436	0.00103	272.162	0.000443642
266.234	0.00116	126.72	0.000342449	266.392	0.000960593	273.125	0.00044009
267.19	0.000779653	126.868	0.000334634	267.352	0.000999897	274.085	0.000360553
268.146	0.000929904	127.016	0.000302122	268.307	0.000964842	275.045	0.000457184
269.103	0.0012	127.162	0.000367263	269.268	0.00105	276.002	0.000388663
270.059	0.000890075	127.308	0.000307119	270.226	0.00101	276.959	0.000359385
271.016	0.000607422	127.455	0.000405662	271.183	0.00107	277.953	0.000304596
271.973	0.000837764	127.6	0.000284029	272.143	0.000941762	278.912	0.000482242
272.928	0.00109	127.748	0.000328646	273.1	0.000951845	279.872	0.000433843
273.884	0.00114	127.895	0.000332943	274.056	0.00097329	280.832	0.000397754
274.839	0.000905807	128.044	0.000324033	275.012	0.000926743	281.793	0.000441949
275.796	0.000564261	128.192	0.000353868	275.968	0.000932047	282.75	0.000347512
276.752	0.00104	128.338	0.000350513	276.926	0.000881819	283.708	0.000450532
277.742	0.00123	128.487	0.000342411	277.92	0.000927302	284.666	0.000326531
278.7	0.00123	128.638	0.000237868	278.876	0.00106	285.621	0.000313513
279.655	0.00106	128.784	0.000402171	279.832	0.000959179	286.58	0.000441926
280.61	0.000496653	128.93	0.000494829	280.789	0.001	287.538	0.000543278
281.568	0.00141	129.078	0.000195169	281.745	0.000603017	288.495	0.000407641
282.524	0.000731437	129.225	0.000274332	282.704	0.00097477	289.45	0.000534384
283.479	0.00101	129.37	0.000506655	283.661	0.000965274	290.41	0.000466855
284.436	0.00077603	129.517	0.000346301	284.621	0.00101	291.371	0.000474231
285.392	0.00055526	129.663	0.000412446	285.58	0.000977201	292.334	0.000325744
286.349	0.00157	129.81	0.000348583	286.538	0.001	293.325	0.00037524
287.306	0.000575044	129.963	0.000422453	287.498	0.000947907	294.281	0.000414579
288.264	0.00078879	130.112	0.000343592	288.492	0.00103	295.238	0.00043103
289.221	0.000899941	130.257	0.000388947	289.449	0.000960593	296.196	0.000471632
290.176	0.00155	130.406	0.000362753	290.406	0.000999897	297.154	0.000393693
291.133	0.000310837	130.552	0.000440533	291.364	0.000964842	298.11	0.000395131
292.09	0.00141	130.697	0.000323217	292.324	0.00105	299.066	0.000682633
293.079	0.00106	130.844	0.000396179	293.315	0.00101	300.025	0.00045604
294.035	0.00103	130.99	0.000341062	294.273	0.00107	300.981	0.000538128
294.991	0.000983682	131.135	0.000411426	295.231	0.000941762	301.955	0.02436
295.949	0.000728837	131.281	0.000341673	296.188	0.000951845	302.918	0.02436
296.904	0.00113	131.427	0.000409034	297.148	0.00107	303.878	0.02431
297.861	0.000961709	131.574	0.000383673	298.105	0.000941762	304.834	0.02418
298.817	0.00124	131.722	0.000331705	299.062	0.000951845	305.792	0.02437
299.775	0.000713001	131.87	0.00035906	300.019	0.02419	306.752	0.02441
300.732	0.00147	132.015	0.000360831	300.977	0.03047	307.71	0.02421
301.69	0.02563	132.165	0.000401131	301.934	0.03233	308.704	0.02417
302.645	0.03034	132.314	0.000310941	302.89	0.03351	309.665	0.02422
303.601	0.03247	132.465	0.000356794	303.846	0.03435	310.626	0.02433
304.556	0.03307	132.615	0.000342235	304.806	0.035	311.584	0.02417
305.514	0.03386	132.762	0.000396245	305.764	0.03557	312.541	0.02419
306.469	0.03485	132.907	0.000325895	306.725	0.03615	313.504	0.02425
307.425	0.03552	133.054	0.000392324	307.682	0.03644	314.465	0.02428
308.416	0.03565	133.202	0.000338593	308.676	0.03677	315.422	0.02419
309.372	0.03647	133.348	0.000372601	309.634	0.03704	316.381	0.02426
310.328	0.03634	133.496	0.000325354	310.59	0.03735	317.343	0.0243
311.284	0.03622	133.642	0.000336496	311.548	0.03793	318.301	0.02422
312.241	0.03656	133.788	0.000347253	312.506	0.03786	319.259	0.02424
313.196	0.0372	133.936	0.000359374	313.472	0.03807	320.222	0.02433
314.152	0.03718	134.086	0.000346546	314.434	0.03824	321.179	0.02439
315.109	0.03724	134.234	0.000343812	315.39	0.03843	322.138	0.0243
316.067	0.03767	134.38	0.000379798	316.346	0.03839	323.097	0.02429
317.023	0.03741	134.527	0.000353745	317.304	0.03873	324.089	0.02438
317.98	0.03729	134.675	0.000333129	318.261	0.03879	325.046	0.02438
318.936	0.0376	134.822	0.000339429	319.218	0.03892	326.008	0.02432
319.894	0.0381	134.968	0.000360629	320.176	0.03929	326.966	0.02426
320.851	0.03833	135.115	0.00034521	321.134	0.03926	327.923	0.02439
321.807	0.03796	135.26	0.000333555	322.092	0.03936	328.88	0.02409
322.764	0.03812	135.407	0.000322597	323.048	0.03936	329.84	0.02411
323.754	0.03795	135.554	0.000352286	324.043	0.03954	330.796	0.02437
324.712	0.03651	135.702	0.000349051	325.001	0.0396	331.752	0.02436
325.668	0.03857	135.848	0.000335205	325.958	0.03971	332.711	0.02405
326.626	0.03807	135.996	0.00029523	326.915	0.03979	333.675	0.02445
327.583	0.0385	136.144	0.000369841	327.873	0.03981	334.634	0.02428
328.541	0.03897	136.29	0.000326475	328.834	0.03994	335.592	0.02437
329.498	0.03824	136.437	0.000333351	329.794	0.03999	336.551	0.02436
330.455	0.03905	136.583	0.000317881	330.756	0.04006	337.508	0.02424
331.412	0.03845	136.732	0.000356961	331.718	0.04011	338.47	0.02419
332.369	0.03825	136.878	0.000309166	332.678	0.04021	339.461	0.02426
333.327	0.03913	137.025	0.000355137	333.642	0.04027	340.419	0.02427
334.283	0.03859	137.172	0.000283904	334.603	0.04032	341.378	0.02423
335.24	0.03889	137.318	0.000338057	335.561	0.04038	342.338	0.02423
336.196	0.0386	137.465	0.00034455	336.518	0.04044	343.299	0.02433
337.153	0.03849	137.613	0.000302974	337.475	0.04042	344.258	0.02438
338.11	0.03915	137.76	0.000355125	338.434	0.0405	345.22	0.02421
339.101	0.03899	137.905	0.000347956	339.426	0.04054	346.183	0.02433
340.057	0.03875	138.086	0.000332271	340.39	0.04057	347.14	0.02441
341.014	0.03907	138.252	0.00033135	341.35	0.04062	348.099	0.02434
341.971	0.03873	138.4	0.000313571	342.306	0.04066	349.06	0.02437
342.928	0.03949	138.55	0.000359112	343.264	0.0406	350.02	0.02425
343.885	0.03939	138.697	0.000310602	344.222	0.0407	350.977	0.02426
344.841	0.03915	138.844	0.000327177	345.18	0.04074	351.938	0.02419
345.799	0.03888	138.99	0.00030568	346.14	0.04076	352.894	0.02435
346.757	0.0398	139.136	0.000381218	347.103	0.04076	353.856	0.02452
347.713	0.0389	139.282	0.000326433	348.063	0.04085	354.85	0.02434
348.669	0.03909	139.465	0.000342104	349.021	0.04084	355.809	0.02421
349.625	0.03949	139.619	0.000309186	349.979	0.04087	356.77	0.02444
350.582	0.03981	139.77	0.000330431	350.939	0.04087	357.73	0.02445
351.538	0.03947	139.917	0.00032262	351.896	0.04091	358.692	0.02427
352.495	0.03917	140.068	0.000290108	352.852	0.0407	359.658	0.02444
353.451	0.03947	140.215	0.000355253	353.808	0.04107	360.62	0.02436
354.442	0.03958	140.362	0.000295108	354.799	0.04106	361.579	0.0243
355.398	0.03964	140.508	0.000393654	355.756	0.04097	362.538	0.02434
356.356	0.03945	140.656	0.000272019	356.713	0.04101	363.498	0.02444
357.313	0.03923	140.802	0.000316632	357.669	0.04103	364.459	0.02434
358.27	0.04011	140.949	0.00032093	358.626	0.04114	365.423	0.02443
359.229	0.0396	141.097	0.000312016	359.585	0.04103	366.383	0.02434
360.185	0.03959	141.244	0.000341842	360.544	0.04108	367.341	0.02423
361.143	0.03932	141.39	0.000338485	361.505	0.04108	368.298	0.02422
362.099	0.03968	141.537	0.00033038	362.465	0.04109	369.259	0.02441
363.057	0.03907	141.688	0.00022584	363.422	0.04114	370.25	0.02425
364.013	0.03842	141.834	0.000390141	364.382	0.04116	371.208	0.02422
364.971	0.03967	141.98	0.000482794	365.343	0.04118	372.166	0.0242
365.927	0.03994	142.127	0.000183133	366.299	0.04122	373.123	0.02439
366.884	0.04046	142.277	0.000262291	367.257	0.04119	374.082	0.0243
367.84	0.03949	142.443	0.000494613	368.214	0.04122	375.048	0.02428
368.798	0.03986	142.592	0.00033426	369.174	0.04125	376.006	0.02426
369.788	0.03967	142.74	0.000400405	370.165	0.04129	376.966	0.02437
370.744	0.04056	142.888	0.000336541	371.122	0.0413	377.923	0.02429
371.701	0.03918	143.035	0.000350328	372.079	0.04129	378.883	0.02438
372.658	0.0404	143.184	0.00034316	373.044	0.04127	379.841	0.02435
373.616	0.03989	143.334	0.000327476	373.999	0.04134	380.803	0.02455
374.572	0.03963	143.488	0.000326555	374.956	0.04131	381.766	0.02436
375.53	0.03984	143.635	0.000308777	375.915	0.04135	382.723	0.0242
376.487	0.03982	143.783	0.000354315	376.871	0.04136	383.682	0.0243
377.443	0.03929	143.933	0.000305804	377.828	0.04137	384.641	0.02433
378.4	0.04043	144.08	0.000322375	378.785	0.04123	385.635	0.02414
379.36	0.03939	144.227	0.000300879	379.742	0.04131	386.593	0.02421
380.316	0.04052	144.374	0.000376417	380.699	0.04135	387.551	0.02429
381.274	0.03908	144.52	0.000321638	381.656	0.04132	388.51	0.02428
382.23	0.04029	144.673	0.000337307	382.614	0.04134	389.467	0.02419
383.187	0.03995	144.818	0.00030439	383.575	0.0413	390.426	0.02417
384.145	0.03976	144.97	0.00032564	384.533	0.0414	391.385	0.02435
385.135	0.04046	145.12	0.000317823	385.528	0.04141	392.343	0.0242
386.091	0.03948	145.267	0.000285312	386.488	0.04145	393.301	0.02422
387.048	0.04066	145.415	0.000350456	387.45	0.04141	394.259	0.02415
388.004	0.04003	145.564	0.000290309	388.408	0.04142	395.219	0.02429
388.96	0.04051	145.71	0.000388854	389.368	0.04137	396.178	0.02432
389.917	0.04048	145.858	0.00026722	390.327	0.04145	397.139	0.0241
390.874	0.03957	146.006	0.000311838	391.285	0.04142	398.099	0.02419
391.83	0.04026	146.153	0.000316133	392.242	0.04144	399.06	0.02426
392.788	0.04002	146.302	0.000307219	393.201	0.04149	400.019	0.02414
393.744	0.04033	146.45	0.000337051	394.158	0.04149	401.013	0.02416
394.701	0.04035	146.6	0.000333696	395.116	0.04148	401.974	0.02429
395.658	0.03946	146.746	0.000309763	396.077	0.04152	402.935	0.02427
396.614	0.04115	146.894	0.000330128	397.036	0.04148	403.894	0.02425
397.571	0.03962	147.047	0.000322339	397.992	0.0415	404.852	0.02424
398.527	0.04088	147.195	0.000302725	398.95	0.04154	405.816	0.0243
399.483	0.03951	147.342	0.000303875	399.912	0.04153	406.778	0.02412
400.473	0.03996	147.49	0.000300828	400.902	0.04153	407.737	0.02425
401.429	0.03987	147.637	0.000314588	401.862	0.04151	408.7	0.02434
402.386	0.04019	147.804	0.000295138	402.824	0.04154	409.662	0.02419
403.343	0.04095	147.95	0.000321969	403.785	0.04154	410.621	0.02424
404.3	0.03937	148.096	0.000327796	404.742	0.04158	411.58	0.0243
405.257	0.04082	148.245	0.000321102	405.7	0.04155	412.544	0.02419
406.213	0.04052	148.395	0.000278574	406.661	0.04159	413.502	0.02416
407.171	0.04028	148.556	0.000323952	407.618	0.04158	414.466	0.02428
408.128	0.04013	148.704	0.000219414	408.578	0.04162	415.425	0.02426
409.085	0.03962	148.85	0.000383718	409.535	0.04161	416.418	0.02414
410.042	0.04117	148.998	0.000476342	410.492	0.0416	417.377	0.02437
411	0.04085	149.148	0.000176674	411.449	0.04116	418.335	0.02427
411.958	0.03954	149.3	0.000255837	412.406	0.04164	419.298	0.02417
412.914	0.04098	149.448	0.000488159	413.364	0.04166	420.258	0.02419
413.872	0.03991	149.595	0.000327807	414.322	0.04167	421.216	0.02435
414.828	0.04108	149.745	0.00039395	415.279	0.04173	422.174	0.0243
415.819	0.03997	149.892	0.000330085	416.268	0.04171	423.136	0.02426
416.777	0.04122	150.04	0.000403947	417.226	0.04175	424.095	0.02438
417.738	0.04023	150.187	0.000325084	418.182	0.04171	425.056	0.02427
418.696	0.0407	150.334	0.000370437	419.141	0.04163	426.018	0.02411
419.653	0.04042	150.482	0.000344239	420.098	0.04177	426.98	0.02426
420.61	0.03978	150.629	0.000422015	421.057	0.04191	427.937	0.02437
421.568	0.0409	150.776	0.000304697	422.014	0.04181	428.895	0.02433
422.524	0.0403	150.925	0.000377661	422.975	0.04181	429.859	0.02432
423.481	0.04063	151.078	0.000322546	423.933	0.04183	430.819	0.0244
424.439	0.03993	151.224	0.000392911	424.892	0.04182	431.815	0.02423
425.396	0.04072	151.371	0.000323157	425.848	0.04181	432.775	0.02419
426.352	0.04108	151.52	0.000390517	426.807	0.04174	433.733	0.02428
427.31	0.04037	151.668	0.000365157	427.764	0.04181	434.694	0.02424
428.267	0.04085	151.814	0.00031319	428.723	0.04179	435.652	0.02427
429.226	0.04034	151.96	0.000340544	429.68	0.04179	436.614	0.02421
430.184	0.04044	152.11	0.000342308	430.64	0.04181	437.576	0.02442
431.177	0.04058	152.257	0.000382606	431.632	0.0417	438.541	0.02428
432.134	0.04033	152.408	0.000292416	432.59	0.0418	439.505	0.02437
433.091	0.04087	152.555	0.000338273	433.548	0.0418	440.468	0.02433
434.048	0.04013	152.704	0.00032371	434.504	0.04182	441.428	0.02425
435.005	0.04093	152.85	0.000377718	435.466	0.04181	442.388	0.02426
435.963	0.03948	152.998	0.000310538	436.426	0.0418	443.347	0.02437
436.92	0.04091	153.145	0.000278022	437.385	0.04183	444.31	0.02425
437.879	0.04063	153.328	0.000343164	438.342	0.04188	445.271	0.02434
438.835	0.04034	153.477	0.000283019	439.3	0.04185	446.231	0.02433
439.794	0.04104	153.63	0.000381562	440.257	0.04188	447.226	0.02422
440.751	0.04016	153.778	0.000259922	441.216	0.04186	448.182	0.0242
441.708	0.04113	153.926	0.000304539	442.172	0.04187	449.142	0.02424
442.666	0.04	154.073	0.000308834	443.128	0.04174	450.108	0.02427
443.623	0.04064	154.225	0.000299924	444.086	0.04185	451.066	0.02425
444.581	0.04078	154.372	0.000329757	445.043	0.04188	452.031	0.02427
445.537	0.04025	154.52	0.000326401	446.004	0.0419	452.992	0.02432
446.529	0.04087	154.668	0.000318303	446.995	0.0419	453.954	0.02427
447.486	0.04041	154.815	0.000213763	447.952	0.04192	454.916	0.0244
448.443	0.04064	154.96	0.000378065	448.908	0.04185	455.876	0.02426
449.4	0.04079	155.106	0.000470721	449.865	0.04197	456.838	0.02424
450.358	0.0404	155.252	0.000171059	450.824	0.04196	457.795	0.02438
451.316	0.04096	155.399	0.000250219	451.781	0.04192	458.757	0.02429
452.272	0.04064	155.547	0.000482542	452.738	0.04201	459.715	0.02432
453.23	0.0408	155.698	0.00032219	453.7	0.04195	460.677	0.0244
454.188	0.04096	155.843	0.000388335	454.656	0.04199	461.642	0.02422
455.144	0.04052	155.99	0.000324471	455.618	0.04193	462.632	0.02434
456.102	0.04126	156.136	0.000398342	456.576	0.04192	463.591	0.02426
457.059	0.04034	156.285	0.00031948	457.536	0.04208	464.552	0.02435
458.015	0.04044	156.434	0.00036483	458.497	0.04203	465.511	0.02423
458.973	0.04113	156.58	0.000338637	459.456	0.04211	466.469	0.02442
459.929	0.04061	156.728	0.000416417	460.415	0.04209	467.427	0.02431
460.887	0.04004	156.875	0.0002991	461.372	0.04209	468.384	0.02441
461.88	0.04184	157.024	0.00037206	462.363	0.04207	469.344	0.02432
462.838	0.0402	157.172	0.000316945	463.321	0.04214	470.305	0.02429
463.795	0.04168	157.32	0.000387307	464.276	0.04205	471.269	0.02445
464.754	0.04029	157.466	0.000317555	465.235	0.04219	472.228	0.02448
465.711	0.0403	157.62	0.000384916	466.193	0.04207	473.188	0.02435
466.669	0.04122	157.767	0.000359551	467.152	0.04216	474.15	0.02426
467.626	0.04067	157.915	0.000307584	468.113	0.04213	475.108	0.02436
468.584	0.04048	158.066	0.000334936	469.076	0.04211	476.071	0.02446
469.542	0.04038	158.216	0.000336706	470.034	0.04216	477.033	0.02437
470.499	0.04157	158.367	0.000377003	470.994	0.04216	478.03	0.02438
471.456	0.04109	158.514	0.000286817	471.951	0.04215	478.991	0.02425
472.414	0.04037	158.666	0.000332673	472.908	0.04221	479.949	0.02447
473.371	0.04159	158.815	0.000318115	473.866	0.04214	480.908	0.02428
474.328	0.04068	158.962	0.000372121	474.823	0.0422	481.866	0.02439
475.285	0.04098	159.11	0.00030177	475.78	0.04214	482.829	0.02448
476.244	0.04055	159.258	0.000368198	476.739	0.04224	483.788	0.02437
477.236	0.04095	159.408	0.000314466	477.729	0.04217	484.748	0.02438
478.194	0.04104	159.556	0.000348473	478.688	0.04224	485.711	0.02433
479.151	0.04053	159.71	0.000301223	479.646	0.04217	486.67	0.02437
480.112	0.04144	159.858	0.000312365	480.605	0.04229	487.628	0.02433
481.07	0.04069	160.004	0.000323127	481.562	0.04217	488.587	0.02445
482.027	0.04106	160.157	0.000335246	482.521	0.0422	489.544	0.02447
482.984	0.04097	160.312	0.000322451	483.479	0.04221	490.502	0.02442
483.94	0.04057	160.46	0.000319718	484.434	0.04231	491.464	0.02438
484.897	0.04133	160.61	0.000355704	485.391	0.04224	492.426	0.02449
485.854	0.0411	160.757	0.000329653	486.351	0.0423	493.424	0.02432
486.811	0.04105	160.904	0.000309036	487.308	0.04228	494.383	0.0244
487.769	0.04104	161.052	0.00031534	488.267	0.04228	495.346	0.02446
488.726	0.04083	161.2	0.000336541	489.225	0.04226	496.304	0.02431
489.685	0.04136	161.35	0.000321121	490.182	0.0423	497.267	0.02434
490.641	0.04057	161.498	0.000309469	491.139	0.04222	498.23	0.0245
491.599	0.04128	161.645	0.000298509	492.095	0.04238	499.188	0.02436
492.59	0.04116	161.792	0.000328199	493.086	0.04231	500.148	0.02429
493.548	0.04131	161.94	0.000324964	494.046	0.04237	501.108	0.02424
494.504	0.04089	162.09	0.000311118	495.004	0.04232	502.067	0.02439
495.463	0.04101	162.238	0.000271142	495.962	0.04237	503.026	0.02427
496.42	0.04104	162.385	0.00034575	496.92	0.0423	503.992	0.02443
497.378	0.04161	162.532	0.000302387	497.878	0.04242	504.956	0.02431
498.336	0.04117	162.68	0.000309262	498.838	0.04227	505.922	0.02442
499.294	0.04137	162.825	0.000293796	499.796	0.04233	506.884	0.02438
500.251	0.04067	162.974	0.00033288	500.752	0.04237	507.847	0.02438
501.21	0.04061	163.12	0.000285086	501.71	0.04234	508.84	0.02448
502.167	0.04136	163.268	0.000331057	502.668	0.04249	509.798	0.02449
503.125	0.0411	163.417	0.000259825	503.629	0.04243	510.756	0.02434
504.082	0.04086	163.564	0.000313978	504.586	0.04244	511.721	0.02448
505.038	0.04071	163.713	0.000320471	505.546	0.04239	512.68	0.02442
505.997	0.04138	163.859	0.000278895	506.504	0.04244	513.639	0.02437
506.956	0.0412	164.005	0.000331006	507.462	0.04244	514.599	0.02432
507.948	0.04104	164.152	0.000323838	508.452	0.04245	515.558	0.02446
508.906	0.04167	164.299	0.00030816	509.409	0.04242	516.521	0.02433
509.865	0.04089	164.447	0.000307237	510.37	0.04245	517.481	0.02429
510.823	0.0414	164.597	0.000289459	511.329	0.04247	518.444	0.02424
511.781	0.04116	164.745	0.000335003	512.292	0.04236	519.403	0.02439
512.739	0.04037	164.894	0.000286493	513.25	0.04249	520.364	0.02439
513.696	0.04158	165.04	0.000303071	514.207	0.04244	521.325	0.02422
514.654	0.04049	165.188	0.000281574	515.17	0.04247	522.282	0.02419
515.613	0.04193	165.338	0.000357114	516.132	0.04254	523.242	0.02419
516.571	0.04086	165.502	0.000302334	517.091	0.04247	524.238	0.02417
517.53	0.04105	165.65	0.000318005	518.048	0.04247	525.202	0.02439
518.488	0.04135	165.798	0.000285076	519.005	0.0425	526.163	0.02406
519.447	0.04082	165.948	0.000306325	519.962	0.04248	527.121	0.02431
520.405	0.04079	166.094	0.000298514	520.918	0.04255	528.079	0.02413
521.363	0.04152	166.243	0.000265997	521.875	0.04252	529.044	0.02418
522.321	0.041	166.392	0.000331141	522.836	0.04243	530.004	0.02411
523.313	0.04168	166.541	0.000270991	523.826	0.0425	530.966	0.02417
524.271	0.0416	166.695	0.000369535	524.786	0.04252	531.925	0.02418
525.23	0.04079	166.845	0.000247903	525.749	0.04254	532.888	0.02441
526.187	0.0414	166.992	0.00029252	526.706	0.04245	533.851	0.02426
527.146	0.04116	167.139	0.000296817	527.666	0.04256	534.815	0.02433
528.104	0.04158	167.286	0.000287904	528.624	0.04256	535.777	0.02443
529.063	0.04146	167.435	0.000317733	529.583	0.0425	536.738	0.02417
530.021	0.04101	167.583	0.000314378	530.54	0.04265	537.703	0.0244
530.98	0.04097	167.73	0.000306279	531.498	0.04253	538.665	0.02433
531.937	0.04135	167.88	0.000201739	532.455	0.0426	539.656	0.02419
532.894	0.04193	168.027	0.000366039	533.415	0.04251	540.619	0.02437
533.854	0.04129	168.177	0.000458697	534.374	0.0426	541.578	0.02435
534.812	0.0416	168.362	0.000159037	535.336	0.04265	542.538	0.02423
535.77	0.04105	168.51	0.000238196	536.296	0.04259	543.535	0.02447
536.727	0.04143	168.657	0.000470518	537.254	0.04262	544.498	0.02439
537.686	0.04142	168.81	0.000310164	538.212	0.04262	545.458	0.02434
538.678	0.04104	168.958	0.000376309	539.205	0.04265	546.421	0.02445
539.637	0.04102	169.107	0.000312443	540.166	0.0426	547.381	0.02441
540.595	0.04168	169.262	0.00038631	541.126	0.04264	548.341	0.02455
541.553	0.04154	169.41	0.000307447	542.084	0.04263	549.301	0.02448
542.511	0.04151	169.559	0.000352802	543.044	0.0427	550.266	0.02441
543.468	0.04119	169.708	0.000326609	544.006	0.04258	551.225	0.02449
544.428	0.04081	169.855	0.00040439	544.963	0.04269	552.187	0.02446
545.386	0.04195	170.002	0.00028707	545.921	0.04262	553.145	0.02435
546.343	0.04135	170.15	0.00036003	546.882	0.04269	554.104	0.02428
547.3	0.04146	170.298	0.000304915	547.845	0.0427	555.096	0.02458
548.258	0.04122	170.447	0.000375281	548.802	0.04268	556.056	0.02454
549.215	0.0413	170.602	0.000305521	549.758	0.04271	557.018	0.02428
550.173	0.04134	170.753	0.000372882	550.717	0.04268	557.975	0.02443
551.129	0.04213	170.9	0.000347517	551.678	0.04272	558.936	0.02437
552.086	0.04138	171.048	0.000295549	552.635	0.04266	559.898	0.02433
553.042	0.04139	171.196	0.000322904	553.592	0.04276	560.856	0.02448
554.034	0.04089	171.348	0.000324677	554.583	0.0427	561.818	0.02445
554.99	0.04168	171.495	0.000364974	555.541	0.04273	562.778	0.02437
555.947	0.04147	171.642	0.000274784	556.501	0.04273	563.737	0.02438
556.904	0.04175	171.792	0.000320641	557.458	0.04274	564.695	0.02441
557.86	0.0409	171.94	0.000306079	558.415	0.04274	565.656	0.02443
558.817	0.04144	172.088	0.000360086	559.372	0.04275	566.613	0.02426
559.775	0.04105	172.24	0.000289731	560.328	0.0428	567.571	0.0244
560.732	0.0419	172.388	0.000356161	561.284	0.04283	568.53	0.02445
561.689	0.04142	172.535	0.000302429	562.24	0.04281	569.488	0.02442
562.646	0.04131	172.685	0.000336436	563.196	0.0428	570.479	0.02431
563.605	0.04134	172.837	0.00028919	564.155	0.04288	571.44	0.02444
564.562	0.04152	172.986	0.000300328	565.111	0.04278	572.403	0.02442
565.519	0.04162	173.134	0.000311088	566.066	0.04282	573.362	0.02431
566.478	0.04147	173.283	0.000323209	567.024	0.04283	574.322	0.02438
567.438	0.04154	173.43	0.000310414	567.984	0.04285	575.281	0.0245
568.4	0.04162	173.584	0.00030768	568.941	0.04286	576.24	0.02442
569.396	0.04175	173.73	0.000343663	569.931	0.04287	577.198	0.02445
570.353	0.04145	173.878	0.000317607	570.888	0.04288	578.156	0.02446
571.314	0.04113	174.03	0.000296992	571.846	0.04287	579.116	0.02442
572.272	0.04157	174.178	0.000303296	572.804	0.04287	580.075	0.02427
573.23	0.04189	174.327	0.000324497	573.763	0.0429	581.036	0.02439
574.187	0.04107	174.497	0.000309079	574.723	0.04294	581.997	0.02437
575.146	0.04169	174.645	0.000297429	575.679	0.04276	582.956	0.02441
576.102	0.04116	174.798	0.000286468	576.64	0.04284	583.913	0.02438
577.059	0.042	174.95	0.000316154	577.596	0.04299	584.873	0.02459
578.015	0.04158	175.097	0.000312918	578.554	0.04293	585.866	0.02434
578.975	0.04165	175.248	0.000299072	579.511	0.04291	586.828	0.0245
579.93	0.04153	175.395	0.000259098	580.468	0.04317	587.787	0.02447
580.889	0.04177	175.543	0.000333705	581.426	0.04294	588.745	0.02431
581.848	0.04168	175.69	0.000290343	582.382	0.04292	589.706	0.02431
582.807	0.04235	175.838	0.000297218	583.338	0.04296	590.666	0.02442
583.768	0.04167	175.988	0.000281753	584.296	0.04295	591.625	0.02441
584.761	0.04146	176.137	0.000320836	585.286	0.04297	592.587	0.02441
585.718	0.04152	176.287	0.000273043	586.246	0.04292	593.55	0.02447
586.677	0.04178	176.435	0.000319018	587.204	0.04303	594.514	0.02437
587.636	0.04201	176.584	0.000247787	588.161	0.04304	595.472	0.02435
588.593	0.04172	176.732	0.000301936	589.119	0.04299	596.438	0.02445
589.552	0.04122	176.88	0.000308428	590.076	0.04308	597.396	0.02427
590.51	0.0418	177.028	0.000266855	591.036	0.0428	598.359	0.0243
591.468	0.04153	177.184	0.000319	591.993	0.04331	599.316	0.02448
592.426	0.04156	177.333	0.000311828	592.951	0.04299	600.275	0.02436
593.384	0.0425	177.483	0.000296149	593.907	0.04299	601.269	0.02437
594.344	0.04114	177.632	0.000295222	594.864	0.04306	602.229	0.0245
595.304	0.04214	177.786	0.000277442	595.824	0.04309	603.204	0.00031337
596.26	0.04229	177.935	0.000322988	596.785	0.04315	604.163	0.000338056
597.221	0.04152	178.084	0.000274473	597.742	0.04309	605.124	0.000280755
598.18	0.04148	178.232	0.000291047	598.7	0.04319	606.085	0.000364678
599.142	0.04133	178.382	0.00026955	599.658	0.0431	607.043	0.00031337
600.134	0.04144	178.53	0.000345088	600.649	0.0194	608.01	0.000338056
601.093	0.0422	178.678	0.000290308	601.61	0.01255	608.971	0.000280755
602.054	0.0415	178.828	0.000305981	602.568	0.01027	609.933	0.000364678
603.014	0.04149	178.975	0.000273001	603.527	0.00889	610.891	0.000380914
603.97	0.04134	179.124	0.000294251	604.484	0.00789	611.85	0.000343935
604.928	0.04197	179.272	0.000286437	605.444	0.00712	612.81	0.000322249
605.887	0.04174	179.42	0.000253924	606.406	0.00648	613.772	0.000307331
606.849	0.0419	179.568	0.000319068	607.365	0.00591	614.733	0.000338476
607.811	0.04116	179.719	0.000258921	608.323	0.00548	615.693	0.000339963
608.773	0.04163	179.872	0.000357464	609.282	0.00502	616.69	0.000380676
609.73	0.04221	180.024	0.00023583	610.24	0.0047	617.654	0.000343626
610.692	0.04182	180.174	0.000280447	611.197	0.00438	618.611	0.000338476
611.65	0.04177	180.325	0.000284745	612.154	0.00409	619.571	0.000339963
612.607	0.04171	180.474	0.000275831	613.112	0.00383	620.534	0.000380676
613.568	0.04128	180.622	0.000305665	614.071	0.00361	621.497	0.000343626
614.526	0.0421	180.777	0.000302307	615.029	0.00323	622.458	0.000379865
615.516	0.04196	180.93	0.000294209	616.02	0.00315	623.42	0.000338476
616.474	0.04192	181.08	0.000189669	616.978	0.00301	624.381	0.000339963
617.43	0.04189	181.227	0.000353969	617.94	0.00288	625.341	0.000380676
618.388	0.04156	181.375	0.000446626	618.896	0.00276	626.3	0.000343626
619.346	0.04171	181.526	0.000146963	619.856	0.00263	627.258	0.00031337
620.305	0.04259	181.683	0.000226125	620.812	0.00249	628.217	0.000338056
621.262	0.04223	181.832	0.000458444	621.773	0.00238	629.178	0.000280755
622.222	0.04131	181.98	0.000298091	622.73	0.0023	630.139	0.000364678
623.178	0.04226	182.128	0.000364232	623.693	0.00222	631.101	0.000348918
624.137	0.04153	182.277	0.000300366	624.648	0.00205	632.092	3.18525e-05
625.094	0.04274	182.426	0.000374236	625.608	0.00201	633.057	0.000343626
626.053	0.04128	182.575	0.000295374	626.565	0.00194	634.014	0.00031337
627.011	0.04208	182.723	0.000340729	627.52	0.00187	634.977	0.000338056
627.968	0.04215	182.87	0.000314534	628.478	0.0018	635.936	0.000280755
628.925	0.04184	183.018	0.000392313	629.437	0.00176	636.896	0.000364678
629.884	0.04174	183.168	0.000274997	630.395	0.00169	637.856	0.000348918
630.874	0.04244	183.32	0.00034796	631.386	0.00167	638.673	0.000343626
631.831	0.042	183.467	0.000292844	632.344	0.00161	639.631	0.00031337
632.79	0.04141	183.648	0.00036321	633.3	0.00156	640.59	0.000338056
633.748	0.04215	183.797	0.000293458	634.262	0.00158	641.549	0.000280755
634.707	0.04249	183.944	0.000360819	635.222	0.00149	642.51	0.000364678
635.665	0.04159	184.095	0.000335457	636.183	0.00148	643.471	0.000348918
636.628	0.04223	184.242	0.000283489	637.141	0.00143	644.429	0.000322249
637.585	0.042	184.39	0.000310845	638.099	0.00142	645.391	0.000307331
638.548	0.04219	184.538	0.000312613	639.056	0.00136	646.349	0.000338476
639.51	0.04276	184.687	0.000352912	640.015	0.00136	647.344	0.000339963
640.473	0.04184	184.84	0.000262727	640.974	0.00133	648.308	0.000380676
641.433	0.04186	184.988	0.000308583	641.932	0.00129	649.271	0.00031337
642.392	0.04206	185.135	0.000294025	642.888	0.00129	650.23	0.000338056
643.35	0.04154	185.284	0.000348034	643.845	0.00128	651.189	0.000280755
644.307	0.04201	185.435	0.000277683	644.805	0.00123	652.148	0.000364678
645.265	0.0413	185.585	0.000344113	645.762	0.00121	653.106	0.000334282
646.255	0.04185	185.734	0.000290375	646.752	0.00121	654.064	0.000328026
647.213	0.04196	185.883	0.000391785	647.71	0.00121	655.022	0.000388663
648.172	0.0421	186.03	0.000365734	648.668	0.00098823	655.981	0.000380914
649.13	0.04208	186.178	0.00034512	649.628	0.00184	656.942	0.000343935
650.093	0.04221	186.33	0.000351419	650.586	0.00153	657.901	0.000322249
651.05	0.04132	186.48	0.00037262	651.544	0.0011	658.863	0.000338476
652.008	0.04205	186.63	0.000357201	652.501	0.0011	659.821	0.000339963
652.966	0.0426	186.782	0.000345547	653.459	0.00109	660.783	0.000380676
653.924	0.0418	186.93	0.000334588	654.419	0.0011	661.742	0.00031337
654.88	0.04163	187.078	0.000364279	655.376	0.00113	662.738	0.000338056
655.84	0.04205	187.228	0.000361043	656.334	0.00108	663.697	0.000280755
656.8	0.04172	187.377	0.000347198	657.292	0.0011	664.657	0.000364678
657.758	0.04183	187.528	0.000307221	658.249	0.00109	665.62	0.000334282
658.715	0.04221	187.676	0.000381831	659.208	0.00117	666.579	0.000328026
659.674	0.0423	187.824	0.00033847	660.167	0.00113	667.543	0.000388663
660.632	0.04205	187.97	0.000345347	661.125	0.00106	668.51	0.000343935
661.63	0.04224	188.12	0.00032988	662.118	0.00113	669.47	0.000364678
662.59	0.04232	188.27	0.000368962	663.076	-0.00101	670.428	0.000334282
663.55	0.04224	188.419	0.000321168	664.036	0.000983818	671.386	0.000328026
664.509	0.04231	188.573	0.000367137	664.992	0.000929282	672.343	0.000388663
665.467	0.04235	188.722	0.000295904	665.951	0.00106	673.303	0.000380914
666.426	0.0416	188.87	0.000350058	666.908	0.00104	674.264	0.000343935
667.388	0.04213	189.02	0.000356549	667.865	0.00104	675.224	0.000322249
668.345	0.04235	189.17	0.000314975	668.825	0.00113	676.187	0.000338476
669.305	0.04229	189.318	0.000367125	669.783	0.00109	677.15	0.000339963
670.262	0.04231	189.467	0.000359957	670.74	0.00102	678.141	0.000380676
671.224	0.04193	189.615	0.000344277	671.698	0.00115	679.101	0.00031337
672.184	0.04261	189.764	0.000343354	672.655	0.0011	680.061	0.000338056
673.144	0.04234	189.912	0.000325576	673.612	0.00108	681.019	0.000280755
674.105	0.0423	190.06	0.000371122	674.571	0.00113	681.981	0.000364678
675.064	0.04233	190.21	0.000322611	675.529	0.00112	682.939	0.000380914
676.022	0.04234	190.362	0.000339185	676.487	0.00113	683.901	0.000364678
677.012	0.04223	190.51	0.000317688	677.477	0.00115	684.859	0.000334282
677.969	0.0421	190.657	0.000393228	678.434	0.00116	685.824	0.000328026
678.929	0.04213	190.808	0.000338446	679.394	0.00116	686.783	0.000388663
679.926	0.04233	190.958	0.000354116	680.352	0.00121	687.742	0.000380914
680.883	0.04215	191.106	0.000321198	681.311	0.00115	688.706	0.000343935
681.843	0.04273	191.254	0.000342449	682.27	0.00119	689.666	0.000322249
682.802	0.04176	191.406	0.000334634	683.228	0.00116	690.626	0.000338476
683.76	0.04238	191.554	0.000302122	684.186	0.00118	691.585	0.000339963
684.722	0.04261	191.705	0.000367263	685.144	0.00118	692.543	0.000380676
685.682	0.04263	191.852	0.000307119	686.106	0.00118	693.536	0.00031337
686.644	0.04203	192.004	0.000405662	687.064	0.00122	694.496	0.000338056
687.605	0.04222	192.152	0.000284029	688.026	0.0012	695.455	0.000280755
688.564	0.04271	192.3	0.000328646	688.983	0.00123	696.417	0.000364678
689.522	0.04215	192.45	0.000332943	689.943	0.00126	697.379	0.000428026
690.481	0.04219	192.6	0.000324033	690.903	0.00119	698.337	0.000388663
691.44	0.04242	192.748	0.000353868	691.865	0.00121	699.296	0.000380914
692.433	0.04229	192.897	0.000350513	692.858	0.00125	700.26	0.000343935
693.394	0.04256	193.05	0.000342411	693.816	0.00126	701.223	0.000422249
694.35	0.04249	193.202	0.000237868	694.773	0.00128	702.182	0.000435067
695.308	0.04254	193.35	0.000402171	695.73	0.00129	703.143	0.000322249
696.27	0.04155	193.497	0.000494829	696.691	0.00125	704.102	0.000307331
697.23	0.04238	193.645	0.000195169	697.651	0.00131	705.061	0.000338476
698.188	0.04224	193.794	0.000274332	698.61	0.00131	706.021	0.000339963
699.144	0.04251	193.942	0.000506655	699.568	0.00129	706.986	0.000380676
700.106	0.04206	194.092	0.000346301	700.526	0.00133	707.944	0.00031337
701.069	0.04213	194.24	0.000412446	701.486	0.00135	708.936	0.000338056
702.03	0.04195	194.387	0.000348583	702.445	0.0013	709.893	0.000280755
702.99	0.04191	194.536	0.000422453	703.402	0.00134	710.852	0.000364678
703.952	0.04269	194.684	0.000343592	704.358	0.00136	711.812	0.000334282
704.909	0.04215	194.832	0.000388947	705.317	0.00136	712.769	0.000328026
705.868	0.0422	194.98	0.000362753	706.278	0.00116	713.727	0.000388663
706.825	0.04204	195.128	0.000440533	707.236	0.00118	714.688	0.000380914
707.817	0.04237	195.275	0.000323217	708.23	0.00125	715.647	0.000343935
708.775	0.04199	195.426	0.000396179	709.188	0.00139	716.606	0.000322249
709.733	0.04225	195.576	0.000341062	710.151	0.0013	717.566	0.000338476
710.692	0.04254	195.726	0.000411426	711.108	0.00133	718.525	0.000339963
711.65	0.04235	195.874	0.000341673	712.066	0.00137	719.489	0.000380676
712.609	0.04234	196.022	0.000409034	713.022	0.0014	720.449	0.00031337
713.568	0.04265	196.172	0.000383673	713.98	0.00133	721.407	0.000338056
714.528	0.04235	196.321	0.000331705	714.938	0.00143	722.37	0.000280755
715.49	0.04241	196.469	0.00035906	715.897	0.00135	723.33	0.000364678
716.448	0.04225	196.618	0.000360831	716.857	0.00146	724.323	0.000334282
717.408	0.04215	196.768	0.000401131	717.815	0.00143	725.283	0.000328026
718.366	0.04265	196.92	0.000310941	718.773	0.00138	726.243	0.000388663
719.328	0.04231	197.072	0.000356794	719.73	0.00146	727.201	0.000343935
720.287	0.04215	197.22	0.000342235	720.69	0.0014	728.16	0.000364678
721.25	0.0424	197.368	0.000396245	721.652	0.00145	729.117	0.000334282
722.208	0.04183	197.516	0.000325895	722.61	0.0015	730.079	0.000328026
723.202	0.04161	197.668	0.000392324	723.602	0.00142	731.039	0.000388663
724.16	0.04239	197.815	0.000338593	724.563	0.0014	731.997	0.000380914
725.119	0.04272	197.962	0.000372601	725.522	0.00155	732.957	0.000343935
726.078	0.0422	198.11	0.000325354	726.481	0.00145	733.917	0.000322249
727.037	0.04224	198.258	0.000336496	727.437	0.00153	734.879	0.000338476
727.996	0.04223	198.41	0.000347253	728.397	0.0015	735.839	0.000339963
728.954	0.04194	198.558	0.000359374	729.354	0.00136	736.803	0.000380676
729.913	0.04224	198.742	0.000346546	730.313	0.00128	737.767	0.00031337
730.872	0.04221	198.89	0.000343812	731.275	0.00167	738.727	0.000338056
731.829	0.04246	199.038	0.000379798	732.233	0.00156	739.721	0.000280755
732.788	0.04253	199.187	0.000353745	733.192	0.0013	740.678	0.000364678
733.746	0.04284	199.337	0.000333129	734.151	0.00134	741.636	0.000380914
734.708	0.0424	199.488	0.000339429	735.106	0.00136	742.596	0.000364678
735.667	0.04344	199.64	0.000360629	736.069	0.00136	743.554	0.000334282
736.625	0.04122	199.789	0.00034521	737.026	0.00116	744.516	0.000328026
737.584	0.04222	199.942	0.000333555	737.984	0.00118	745.473	0.000388663
738.574	0.0425	200.09	0.000322597	738.974	0.00125	746.433	0.000380914
739.534	0.04242	200.24	0.000352286	739.933	0.00139	747.393	0.000343935
740.494	0.04209	200.388	0.000349051	740.894	0.0013	748.353	0.000322249
741.45	0.04261	200.538	0.000335205	741.852	0.00133	749.316	0.000338476
742.41	0.04225	200.688	0.00029523	742.808	0.00137	750.274	0.000339963
743.373	0.04243	200.834	0.000369841	743.766	0.0014	751.233	0.000380676
744.332	0.04227	200.987	0.000326475	744.726	0.00133	752.194	0.00031337
745.29	0.04287	201.134	0.000333351	745.684	0.00143	753.153	0.000338056
746.252	0.04227	201.288	0.000317881	746.642	0.00135	754.115	0.000280755
747.211	0.04244	201.44	0.000356961	747.6	0.00146	755.107	0.000364678
748.173	0.04225	201.59	0.000309166	748.558	0.00143	756.066	0.000428026
749.132	0.04268	201.742	0.000355137	749.516	0.00138	757.024	0.000388663
750.09	0.04274	201.892	0.000283904	750.474	0.00146	757.983	0.000380914
751.05	0.04234	202.04	0.000338057	751.434	0.0014	758.943	0.000322249
752.009	0.04235	202.188	0.00034455	752.392	0.00145	759.901	0.000307331
752.967	0.04256	202.34	0.000302974	753.353	0.0015	760.859	0.000338476
753.958	0.04263	202.488	0.000355125	754.345	0.00142	761.819	0.000339963
754.916	0.0426	202.637	0.000347956	755.303	0.0014	762.781	0.000380676
755.874	0.04253	202.79	0.000332271	756.263	0.00155	763.746	0.00031337
756.834	0.04285	202.937	0.00033135	757.222	0.00145	764.703	0.000338056
757.792	0.04227	203.087	0.000313571	758.182	0.00153	765.663	0.000280755
758.75	0.04268	203.24	0.000359112	759.143	0.0015	766.623	0.000364678
759.71	0.04291	203.388	0.000310602	760.105	0.00136	767.617	0.000334282
760.667	0.04237	203.54	0.000327177	761.064	0.00128	768.579	0.000328026
761.626	0.04178	203.688	0.00030568	762.022	0.00167	769.539	0.000388663
762.586	0.04235	203.837	0.000381218	762.982	0.00156	770.533	0.000380914
763.545	0.04268	203.991	0.000326433	763.943	0.0013	771.495	0.000343935
764.505	0.04224	204.14	0.000342104	764.901	0.00134	772.454	0.000322249
765.464	0.04266	204.288	0.000309186	765.859	0.00136	773.415	0.000338476
766.423	0.04247	204.443	0.000330431	766.818	0.00136	774.377	0.000339963
767.381	0.04263	204.59	0.00032262	767.778	0.00116	775.336	0.000380676
768.343	0.04263	204.738	0.000290108	768.738	0.00118	776.293	0.00031337
769.337	0.0424	204.885	0.000355253	769.734	0.00125	777.256	0.000338056
770.298	0.04241	205.034	0.000295108	770.692	0.00139	778.216	0.000280755
771.256	0.04277	205.182	0.000393654	771.649	0.0013	779.176	0.000364678
772.217	0.04287	205.332	0.000272019	772.608	0.00133	780.135	0.000334282
773.176	0.04234	205.484	0.000316632	773.569	0.00137	781.096	0.000328026
774.135	0.04259	205.634	0.00032093	774.526	0.0014	782.055	0.000388663
775.094	0.04247	205.787	0.000312016	775.484	0.00133	783.013	0.000343935
776.052	0.04223	205.945	0.000341842	776.443	0.00143	783.973	0.000364678
777.01	0.04219	206.097	0.000338485	777.402	0.00135	784.933	0.000334282
777.971	0.04334	206.253	0.00033038	778.362	0.00146	785.926	0.000328026
778.928	0.04262	206.402	0.00022584	779.323	0.00143	786.886	0.000388663
779.888	0.04267	206.552	0.000390141	780.282	0.00138	787.847	0.000380914
780.848	0.04253	206.705	0.000482794	781.242	0.00146	788.807	0.000343935
781.806	0.04267	206.854	0.000183133	782.204	0.0014	789.767	0.000322249
782.767	0.04234	207.008	0.000262291	783.162	0.00145	790.73	0.000338476
783.726	0.04284	207.157	0.000494613	784.12	0.0015	791.691	0.000339963
784.717	0.0429	207.306	0.00033426	785.112	0.00142	792.651	0.000380676
785.677	0.04214	207.454	0.000400405	786.071	0.0014	793.611	0.00031337
786.638	0.04269	207.603	0.000336541	787.031	0.00155	794.57	0.000338056
787.597	0.04266	207.752	0.000350328	787.99	0.00145	795.532	0.000280755
788.557	0.04321	207.9	0.00034316	788.948	0.00153	796.489	0.000364678
789.516	0.04236	208.052	0.000327476	789.908	0.0015	797.449	0.000380914
790.474	0.04297	208.2	0.000326555	790.867	0.00136	798.41	0.000364678
791.432	0.04308	208.348	0.000308777	791.826	0.00128	799.369	0.000334282
792.392	0.04271	208.505	0.000354315	792.784	0.00167	800.33	0.000328026
793.35	0.04242	208.654	0.000305804	793.743	0.00156	801.326	0.000388663
794.31	0.04317	208.81	0.000322375	794.703	0.0013	802.286	0.000380914
795.268	0.04279	208.957	0.000300879	795.662	0.00134	803.247	0.000343935
796.228	0.04302	209.106	0.000376417	796.621	0.00136	804.204	0.000322249
797.188	0.04269	209.253	0.000321638	797.579	0.00136	805.163	0.000338476
798.145	0.04286	209.404	0.000337307	798.536	0.00116	806.123	0.000339963
799.105	0.04294	209.552	0.00030439	799.493	0.00118	807.083	0.000380676
800.098	0.04282	209.701	0.00032564	800.484	0.00125	808.043	0.00031337
801.057	0.04272	209.854	0.000317823	801.444	0.00139	809.006	0.000338056
802.015	0.04259	210.002	0.000285312	802.404	0.0013	809.969	0.000280755
802.973	0.0427	210.15	0.000350456	803.365	0.00133	810.933	0.000364678
803.93	0.04265	210.3	0.000290309	804.324	0.00137	811.891	0.000428026
804.89	0.0422	210.449	0.000388854	805.284	0.0014	812.854	0.000388663
805.848	0.04251	210.598	0.00026722	806.243	0.00133	813.818	0.000380914
806.807	0.04315	210.746	0.000311838	807.206	0.00143	814.778	0.000322249
807.767	0.04257	210.898	0.000316133	808.163	0.00135	815.741	0.000307331
808.726	0.04243	211.052	0.000307219	809.121	0.00146	816.736	0.000338476
809.685	0.0424	211.203	0.000337051	810.078	0.00143	817.696	0.000339963
810.644	0.04345	211.352	0.000333696	811.037	0.00138	818.659	0.000380676
811.602	0.04276	211.505	0.000309763	811.995	0.00146	819.622	0.00031337
812.561	0.0425	211.658	0.000330128	812.952	0.0014	820.582	0.000338056
813.52	0.04318	211.806	0.000322339	813.91	0.00145	821.547	0.000280755
814.48	0.04226	211.955	0.000302725	814.868	0.0015	822.506	0.000364678
815.474	0.04271	212.105	0.000303875	815.861	0.00142	823.466	0.000334282
816.432	0.0431	212.257	0.000300828	816.821	0.0014	824.427	0.000328026
817.39	0.04328	212.41	0.000314588	817.778	0.00155	825.388	0.000388663
818.353	0.0425	212.562	0.000295138	818.736	0.00145	826.347	0.000380914
819.311	0.04337	212.709	0.000321969	819.695	0.00153	827.306	0.000343935
820.271	0.04342	212.856	0.000327796	820.653	0.0015	828.266	0.000322249
821.229	0.04316	213.006	0.000321102	821.612	0.00136	829.226	0.000338476
822.187	0.04288	213.158	0.000278574	822.571	0.00128	830.189	0.000339963
823.145	0.0423	213.307	0.000323952	823.529	0.00167	831.151	0.000380676
824.104	0.04276	213.454	0.000219414	824.494	0.00156	832.145	0.00031337
825.061	0.04342	213.601	0.000383718	825.452	0.0013	833.103	0.000338056
826.019	0.04248	213.786	0.000476342	826.412	0.00134	834.063	0.000280755
826.977	0.04246	213.942	0.000176674	827.373	0.00136	835.023	0.000364678
827.937	0.04283	214.09	0.000255837	828.33	0.00136	835.987	0.000334282
828.896	0.04327	214.24	0.000488159	829.291	0.00116	836.947	0.000328026
829.854	0.04267	214.388	0.000327807	830.252	0.00118	837.907	0.000388663
830.845	0.04279	214.538	0.00039395	831.245	0.00125	838.866	0.000343935
831.804	0.04137	214.687	0.000330085	832.205	0.00139	839.826	0.000364678
832.762	0.04124	214.845	0.000403947	833.164	0.0013	840.786	0.000334282
833.724	0.04139	214.995	0.000325084	834.123	0.00133	841.748	0.000328026
834.682	0.04211	215.145	0.000370437	835.086	0.00137	842.711	0.000388663
835.642	0.04232	215.298	0.000344239	836.045	0.0014	843.672	0.000380914
836.605	0.04212	215.45	0.000422015	837.002	0.00133	844.636	0.000343935
837.564	0.04211	215.6	0.000304697	837.96	0.00143	845.596	0.000322249
838.524	0.0431	215.748	0.000377661	838.918	0.00135	846.556	0.000338476
839.481	0.04155	215.896	0.000322546	839.881	0.00146	847.549	0.000339963
840.441	0.04222	216.045	0.000392911	840.84	0.00143	848.509	0.000380676
841.4	0.04237	216.194	0.000323157	841.801	0.00138	849.469	0.00031337
842.357	0.04277	216.344	0.000390517	842.758	0.00146	850.429	0.000338056
843.316	0.04279	216.492	0.000365157	843.721	0.0014	851.39	0.000280755
844.277	0.04228	216.64	0.00031319	844.679	0.00145	852.351	0.000364678
845.236	0.04271	216.789	0.000340544	845.639	0.0015	853.311	0.000380914
846.228	0.0433	216.946	0.000342308	846.63	0.00142	854.273	0.000364678
847.186	0.04239	217.098	0.000382606	847.59	0.0014	855.231	0.000334282
848.146	0.04281	217.25	0.000292416	848.552	0.00155	856.191	0.000328026
849.106	0.04344	217.397	0.000338273	849.513	0.00145	857.151	0.000388663
850.064	0.04331	217.55	0.00032371	850.472	0.00153	858.111	0.000380914
851.024	0.04269	217.7	0.000377718	851.431	0.0015	859.073	0.000343935
851.987	0.04267	217.849	0.000310538	852.391	0.00136	860.033	0.000322249
852.944	0.04364	218.002	0.000278022	853.351	0.00128	860.997	0.000338476
853.907	0.04241	218.152	0.000343164	854.309	0.00167	861.959	0.000339963
854.866	0.04207	218.3	0.000283019	855.267	0.00156	862.953	0.000380676
855.824	0.04304	218.452	0.000381562	856.228	0.0013	863.913	0.00031337
856.782	0.04398	218.607	0.000259922	857.189	0.00134	864.874	0.000338056
857.741	0.04342	218.756	0.000304539	858.148	0.00136	865.833	0.000280755
858.698	0.04249	218.908	0.000308834	859.106	0.00136	866.794	0.000364678
859.658	0.04261	219.058	0.000299924	860.064	0.00116	867.753	0.000428026
860.616	0.04333	219.208	0.000329757	861.023	0.00118	868.713	0.000388663
861.611	0.04308	219.358	0.000326401	862.016	0.00125	869.673	0.000380914
862.568	0.04287	219.506	0.000318303	862.974	0.00139	870.633	0.000322249
863.529	0.04274	219.656	0.000213763	863.933	0.0013	871.599	0.000307331
864.491	0.04301	219.805	0.000378065	864.892	0.00133	872.564	0.000338476
865.45	0.04356	219.954	0.000470721	865.851	0.00137	873.523	0.000339963
866.409	0.0423	220.104	0.000171059	866.809	0.0014	874.483	0.000380676
867.368	0.04278	220.256	0.000250219	867.768	0.00133	875.443	0.00031337
868.331	0.04352	220.404	0.000482542	868.728	0.00143	876.403	0.000338056
869.292	0.04273	220.552	0.00032219	869.687	0.00135	877.363	0.000280755
870.25	0.04258	220.7	0.000388335	870.646	0.00146	878.357	0.000364678
871.213	0.04256	220.848	0.000324471	871.604	0.00143	879.316	0.000334282
872.173	0.04306	220.995	0.000398342	872.567	0.00138	880.28	0.000328026
873.133	0.04337	221.145	0.00031948	873.525	0.00146	881.24	0.000388663
874.095	0.04302	221.298	0.00036483	874.484	0.0014	882.203	0.000380914
875.052	0.04262	221.445	0.000338637	875.444	0.00145	883.163	0.000343935
876.012	0.04293	221.594	0.000416417	876.402	0.0015	884.123	0.000322249
877.006	0.04308	221.742	0.0002991	877.397	0.00142	885.083	0.000338476
877.97	0.04297	221.894	0.00037206	878.357	0.0014	886.042	0.000339963
878.93	0.04271	222.042	0.000316945	879.318	0.00155	887.005	0.000380676
879.891	0.04328	222.195	0.000387307	880.276	0.00145	887.964	0.00031337
880.85	0.04295	222.342	0.000317555	881.239	0.00153	888.923	0.000338056
881.81	0.04325	222.49	0.000384916	882.197	0.0015	889.886	0.000280755
882.772	0.04308	222.644	0.000359551	883.155	0.00136	890.846	0.000364678
883.73	0.04279	222.792	0.000307584	884.115	0.00128	891.809	0.000334282
884.691	0.04267	222.943	0.000334936	885.074	0.00167	892.771	0.000328026
885.65	0.04236	223.094	0.000336706	886.035	0.00156	893.767	0.000388663
886.608	0.0414	223.246	0.000377003	886.994	0.0013	894.726	0.000343935
887.569	0.04139	223.394	0.000286817	887.952	0.00134	895.687	0.000364678
888.528	0.04183	223.543	0.000332673	888.912	0.00136	896.649	0.000334282
889.49	0.04163	223.69	0.000318115	889.875	0.00136	897.613	0.000328026
890.45	0.04201	223.842	0.000372121	890.836	0.00116	898.573	0.000388663
891.408	0.04256	223.992	0.00030177	891.796	0.00118	899.531	0.000380914
892.404	0.04288	224.144	0.000368198	892.788	0.00125	900.496	0.000343935
893.364	0.0423	224.292	0.000314466	893.746	0.00139	901.455	0.000322249
894.321	0.04313	224.44	0.000348473	894.705	0.0013	902.417	0.000338476
895.279	0.04326	224.592	0.000301223	895.665	0.00133	903.377	0.000339963
896.239	0.04275	224.74	0.000312365	896.626	0.00137
897.198	0.0425	224.887	0.000323127	897.585	0.0014
898.158	0.04289	225.036	0.000335246	898.544	0.00133
899.117	0.04313	225.184	0.000322451	899.503	0.00143
900.076	0.043	225.332	0.000319718	900.461	0.00135
901.036	0.0431	225.48	0.000355704	901.421	0.00146
901.994	0.04308	225.627	0.000329653
902.953	0.04323	225.777	0.000309036
903.914	0.04267	225.924	0.00031534
904.872	0.04269	226.074	0.000336541
905.834	0.043	226.225	0.000321121
906.797	0.04309	226.375	0.000309469
907.79	0.04269	226.524	0.000298509
908.75	0.04275	226.674	0.000328199
909.71	0.04319	226.822	0.000324964
910.671	0.04333	226.972	0.000311118
911.634	0.04327	227.122	0.000271142
912.594	0.0434	227.272	0.00034575
913.557	0.04331	227.422	0.000302387
914.516	0.0432	227.57	0.000309262
915.476	0.04323	227.72	0.000293796
916.437	0.04308	227.868	0.00033288
917.397	0.04322	228.016	0.000285086
918.357	0.04337	228.168	0.000331057
919.315	0.04314	228.316	0.000259825
920.275	0.04329	228.465	0.000313978
921.234	0.04311	228.613	0.000320471
922.196	0.04325	228.765	0.000278895
923.188	0.04336	228.956	0.000331006
924.148	0.0435	229.104	0.000323838
925.108	0.04266	229.25	0.00030816
926.067	0.04321	229.4	0.000307237
927.026	0.04342	229.548	0.000289459
927.989	0.04348	229.698	0.000335003
928.948	0.04306	229.846	0.000286493
929.912	0.04319	229.994	0.000303071
930.874	0.04333	230.143	0.000281574
931.834	0.04368	230.29	0.000357114
932.796	0.04311	230.438	0.000302334
933.757	0.04298	230.587	0.000318005
934.717	0.04403	230.747	0.000285076
935.676	0.04339	230.898	0.000306325
936.635	0.04235	231.045	0.000298514
937.594	0.04353	231.198	0.000265997
938.591	0.04366	231.347	0.000331141
939.551	0.04272	231.5	0.000270991
940.51	0.04344	231.65	0.000369535
941.473	0.04377	231.798	0.000247903
942.434	0.04333	231.946	0.00029252
943.392	0.043	232.096	0.000296817
944.35	0.04322	232.248	0.000287904
945.308	0.04356	232.403	0.000317733
946.268	0.04342	232.552	0.000314378
947.228	0.04315	232.702	0.000306279
948.188	0.04323	232.851	0.000201739
949.149	0.04362	233.002	0.000366039
950.108	0.04323	233.15	0.000458697
951.074	0.04367	233.298	0.000159037
952.035	0.04399	233.45	0.000238196
952.994	0.04349	233.6	0.000470518
953.987	0.04266	233.75	0.000310164
954.945	0.04371	233.898	0.000376309
955.905	0.04352	234.048	0.000312443
956.864	0.04276	234.2	0.00038631
957.822	0.04286	234.35	0.000307447
958.783	0.04311	234.498	0.000352802
959.742	0.04347	234.645	0.000326609
960.703	0.04326	234.792	0.00040439
961.663	0.04312	234.944	0.00028707
962.624	0.04297	235.096	0.00036003
963.582	0.04327	235.244	0.000304915
964.54	0.04346	235.393	0.000375281
965.5	0.04375	235.548	0.000305521
966.46	0.04348	235.697	0.000372882
967.42	0.04267	235.85	0.000347517
968.382	0.04345	236	0.000295549
969.375	0.04393	236.148	0.000322904
970.34	0.04325	236.295	0.000324677
971.298	0.04345	236.447	0.000364974
972.26	0.04403	236.6	0.000274784
973.221	0.04456	236.747	0.000320641
974.18	0.04338	236.898	0.000306079
975.141	0.04315	237.05	0.000360086
976.1	0.04382	237.203	0.000289731
977.058	0.04393	237.354	0.000356161
978.019	0.04364	237.502	0.000302429
978.982	0.04364	237.65	0.000336436
979.942	0.04373	237.797	0.00028919
980.902	0.04383	237.95	0.000300328
981.862	0.0438	238.099	0.000311088
982.82	0.0437	238.246	0.000323209
983.78	0.044	238.394	0.000310414
984.775	0.04368	238.542	0.00030768
985.737	0.04322	238.694	0.000343663
986.696	0.04314	238.846	0.000317607
987.656	0.04353	238.994	0.000296992
988.616	0.04339	239.142	0.000303296
989.581	0.04368	239.292	0.000324497
990.542	0.04331	239.44	0.000309079
991.501	0.04378	239.588	0.000297429
992.462	0.04353	239.738	0.000286468
993.421	0.04358	239.892	0.000316154
994.38	0.04348	240.041	0.000312918
995.341	0.04358	240.192	0.000299072
996.303	0.04336	240.34	0.000259098
997.262	0.04351	240.49	0.000333705
998.222	0.04368	240.64	0.000290343
999.18	0.04421	240.788	0.000297218
1000.17	0.04335	240.936	0.000281753
1001.13	0.04342	241.085	0.000320836
1002.11	0.04347	241.232	0.000273043
1003.07	0.04398	241.38	0.000319018
1004.03	0.04366	241.527	0.000247787
1004.99	0.04398	241.68	0.000301936
1005.95	0.04372	241.829	0.000308428
1006.92	0.0438	241.978	0.000266855
1007.88	0.04356	242.132	0.000319
1008.84	0.0436	242.284	0.000311828
1009.8	0.04378	242.432	0.000296149
1010.76	0.04373	242.585	0.000295222
1011.72	0.04351	242.735	0.000277442
1012.67	0.04312	242.884	0.000322988
1013.63	0.0433	243.037	0.000274473
1014.59	0.04369	243.19	0.000291047
1015.59	0.04153	243.338	0.00026955
1016.55	0.04329	243.487	0.000345088
1017.51	0.04383	243.635	0.000290308
1018.47	0.04341	243.783	0.000305981
1019.42	0.0425	243.999	0.000273001
1020.38	0.04353	244.148	0.000294251
1021.35	0.0438	244.298	0.000286437
1022.31	0.04391	244.448	0.000253924
1023.27	0.04363	244.596	0.000319068
1024.23	0.04374	244.746	0.000258921
1025.19	0.04346	244.898	0.000357464
1026.15	0.04398	245.047	0.00023583
1027.11	0.04382	245.195	0.000280447
1028.07	0.04343	245.344	0.000284745
1029.03	0.04297	245.498	0.000275831
1029.99	0.04348	245.647	0.000305665
1030.98	0.04401	245.8	0.000302307
1031.95	0.04379	245.948	0.000294209
1032.91	0.04322	246.097	0.000189669
1033.87	0.04324	246.248	0.000353969
1034.83	0.0428	246.397	0.000446626
1035.79	0.043	246.548	0.000146963
1036.75	0.04429	246.697	0.000226125
1037.71	0.04424	246.85	0.000458444
1038.67	0.04402	246.999	0.000298091
1039.63	0.04427	247.152	0.000364232
1040.59	0.04292	247.302	0.000300366
1041.55	0.04406	247.45	0.000374236
1042.51	0.04413	247.599	0.000295374
1043.47	0.04424	247.748	0.000340729
1044.43	0.04404	247.897	0.000314534
1045.39	0.04314	248.046	0.000392313
1046.38	0.04321	248.193	0.000274997
1047.34	0.04358	248.342	0.00034796
1048.3	0.04401	248.492	0.000292844
1049.26	0.04316	248.64	0.00036321
1050.22	0.04379	248.787	0.000293458
1051.18	0.04438	248.935	0.000360819
1052.14	0.04386	249.085	0.000335457
1053.1	0.04356	249.234	0.000283489
1054.06	0.04363	249.382	0.000310845
1055.02	0.04457	249.534	0.000312613
1055.98	0.04462	249.684	0.000352912
1056.94	0.04369	249.832	0.000262727
1057.9	0.04308	249.98	0.000308583
1058.86	0.04484	250.127	0.000294025
1059.82	0.0439	250.276	0.000348034
1060.78	0.04328	250.425	0.000277683
1061.77	0.04339	250.576	0.000344113
1062.73	0.04346	250.73	0.000290375
1063.69	0.04411	250.89	0.000324371
1064.65	0.04394	251.038	0.000277125
1065.61	0.04347	251.185	0.000288268
1066.57	0.04351	251.333	0.000299029
1067.53	0.04448	251.482	0.000311148
1068.49	0.04378	251.632	0.000298351
1069.45	0.04382	251.78	0.000295617
1070.41	0.04458	251.93	0.000331602
1071.37	0.04417	252.079	0.000305549
1072.33	0.04368	252.23	0.000284931
1073.29	0.04376	252.378	0.000291235
1074.25	0.04366	252.531	0.000312433
1075.21	0.04491	252.689	0.000297006
1076.17	0.04403	252.842	0.000285352
1077.16	0.04351	252.992	0.000274391
1078.13	0.04372	253.141	0.000304081
1079.09	0.04385	253.29	0.000300846
1080.05	0.0442	253.44	0.000287
1081	0.0443	253.59	0.000247024
1081.97	0.04377	253.742	0.00032163
1082.93	0.04379	253.89	0.000278269
1083.88	0.04442	254.038	0.000285144
1084.85	0.04353	254.186	0.000269679
1085.81	0.04333	254.334	0.000308763
1086.77	0.04383	254.482	0.000260969
1087.73	0.04456	254.63	0.000306944
1088.69	0.04361	254.777	0.000235714
1089.65	0.04368	254.926	0.000289866
1090.61	0.04301	255.075	0.000296358
1091.57	0.0437	255.225	0.000254784
1092.57	0.04451	255.373	0.000306934
1093.52	0.04377	255.526	0.000299762
1094.48	0.04333	255.678	0.000284079
1095.44	0.04353	255.826	0.000283157
1096.4	0.04349	255.974	0.000265379
1097.36	0.04427	256.122	0.000310925
1098.32	0.04435	256.27	0.000262415
1099.28	0.04363	256.42	0.000278991
1100.24	0.04346	256.568	0.000257495
1101.2	0.0438	256.717	0.000333033
1102.16	0.04387	256.868	0.00027825
1103.12	0.04143	257.022	0.000293917
1104.08	0.04329	257.172	0.000260997
1105.04	0.04355	257.32	0.000282248
1106	0.04243	257.47	0.000274435
1106.96	0.04308	257.62	0.000241921
1107.95	0.04357	257.77	0.000307063
1108.91	0.04366	257.92	0.000246917
1109.88	0.04278	258.078	0.000345454
1110.84	0.04358	258.23	0.000223817
1111.8	0.04359	258.378	0.000268434
1112.76	0.04423	258.527	0.000272732
1113.72	0.04329	258.684	0.000263815
1114.68	0.04362	258.834	0.000293649
1115.64	0.04312	258.987	0.00029029
1116.6	0.04384	259.175	0.000282156
1117.56	0.04487	259.328	0.000177613
1118.52	0.04371	259.477	0.000341915
1119.48	0.04334	259.625	0.000434572
1120.44	0.0438	259.775	0.00013491
1121.4	0.04348	259.927	0.00021407
1122.36	0.04375	260.075	0.000446393
1123.35	0.04349	260.234	0.000286031
1124.31	0.04475	260.382	0.000352176
1125.27	0.0446	260.53	0.000288312
1126.23	0.04481	260.678	0.000362182
1127.19	0.04419	260.829	0.000283319
1128.15	0.0428	260.982	0.000328669
1129.11	0.04415	261.13	0.000302476
1130.07	0.04473	261.282	0.000380252
1131.03	0.04432	261.432	0.000262933
1131.99	0.04387	261.58	0.000335897
1132.95	0.04329	261.732	0.000280779
1133.91	0.04356	261.882	0.000351143
1134.87	0.04456	262.031	0.00028139
1135.83	0.04469	262.18	0.00034875
1136.79	0.04356	262.328	0.00032339
1137.75	0.04379	262.478	0.000271421
1138.74	0.04337	262.629	0.000298774
1139.7	0.04375	262.782	0.000300541
1140.66	0.045	262.931	0.000340841
1141.62	0.04419	263.084	0.000250651
1142.58	0.04321	263.233	0.000296506
1143.54	0.04345	263.382	0.000281946
1144.5	0.04426	263.532	0.000335955
1145.46	0.04525	263.682	0.000265603
1146.42	0.04491	263.832	0.000332033
1147.38	0.04439	263.985	0.000278297
1148.34	0.04446	264.137	0.0003123
1149.3	0.04489	264.29	0.000265049
1150.26	0.04352	264.445	0.000276185
1151.22	0.04307	264.595	0.000286944
1152.18	0.04428	264.744	0.000299063
1153.14	0.04412	264.893	0.000286268
1154.13	0.04483	265.043	0.000283532
1155.1	0.0446	265.195	0.000319514
1156.06	0.04369	265.348	0.000293458
1157.02	0.04329	265.508	0.000272832
1157.98	0.04407	265.658	0.000279134
1158.94	0.04505	265.808	0.000300335
1159.9	0.04471	265.957	0.000284916
1160.86	0.04462	266.11	0.000273262
1161.82	0.04378	266.258	0.000262303
1162.78	0.04358	266.408	0.000291992
1163.74	0.04378	266.557	0.000288756
1164.7	0.04483	266.71	0.000274908
1165.66	0.04492	266.86	0.000234932
1166.62	0.0449	267.008	0.000309541
1167.58	0.04493	267.157	0.00026618
1168.54	0.04337	267.307	0.000273053
1169.53	0.04326	267.457	0.000257586
1170.49	0.04358	267.608	0.000296668
1171.45	0.04278	267.756	0.000248874
1172.42	0.04483	267.908	0.000294845
1173.38	0.04503	268.058	0.000223612
1174.33	0.04436	268.21	0.000277761
1175.29	0.04542	268.36	0.000284252
1176.25	0.04495	268.51	0.000242679
1177.22	0.04356	268.66	0.000294827
1178.18	0.04354	268.81	0.000287657
1179.14	0.04318	268.959	0.000271977
1180.1	0.04298	269.108	0.000271054
1181.06	0.04316	269.259	0.000253273
1182.02	0.04302	269.412	0.000298815
1182.98	0.04317	269.562	0.000250303
1183.94	0.04301	269.712	0.000266879
1184.93	0.0435	269.864	0.000245379
1185.89	0.04521	270.012	0.000320918
1186.85	0.04449	270.16	0.000266138
1187.81	0.04317	270.31	0.000281809
1188.77	0.0436	270.461	0.000248888
1189.73	0.04351	270.61	0.000270138
1190.69	0.04421	270.76	0.000262324
1191.65	0.04559	270.91	0.000229811
1192.61	0.04504	271.06	0.000294953
1193.57	0.04411	271.21	0.000234806
1194.53	0.04367	271.363	0.000333348
1195.49	0.04368	271.512	0.000211714
1196.45	0.04479	271.662	0.00025633
1197.42	0.04561	271.816	0.000260623
1198.38	0.04485	271.97	0.000251709
1199.34	0.04418	272.117	0.000281545
1200.34	0.04356	272.268	0.000278188
1201.3	0.04491	272.418	0.000270089
1202.26	0.04461	272.572	0.000165544
1203.22	0.04367	272.722	0.000329846
1204.18	0.04448	272.872	0.000422501
1205.14	0.04421	273.022	0.000122839
1206.1	0.04398	273.175	0.000201998
1207.06	0.04445	273.326	0.000434318
1208.02	0.04445	273.475	0.000273965
1208.98	0.04478	273.624	0.00034011
1209.94	0.0444	273.774	0.000276244
1210.9	0.04403	273.924	0.000350112
1211.86	0.04384	274.075	0.000271249
1212.82	0.04412	274.258	0.000316572
1213.79	0.04419	274.407	0.000290377
1214.74	0.04508	274.556	0.000368156
1215.74	0.04371	274.705	0.000250839
1216.7	0.0441	274.864	0.000323793
1217.66	0.04454	275.012	0.000268678
1218.62	0.04402	275.162	0.000339042
1219.58	0.04409	275.31	0.000269289
1220.54	0.04505	275.462	0.000336647
1221.5	0.04467	275.616	0.000311282
1222.46	0.04418	275.768	0.000259311
1223.42	0.04435	275.922	0.000286661
1224.38	0.04501	276.072	0.000288431
1225.34	0.04432	276.225	0.000328728
1226.3	0.04403	276.374	0.000238541
1227.26	0.04407	276.524	0.000284395
1228.22	0.04494	276.684	0.000269825
1229.18	0.04482	276.844	0.000323825
1230.15	0.04406	276.993	0.000253474
1231.14	0.04368	277.143	0.000319904
1232.11	0.04399	277.292	0.000266171
1233.07	0.04389	277.443	0.000300176
1234.03	0.04454	277.592	0.000252928
1234.99	0.04455	277.74	0.00026407
1235.95	0.0448	277.891	0.000274829
1236.91	0.04507	278.041	0.000286947
1237.88	0.0439	278.193	0.000274148
1238.83	0.04419	278.342	0.000271414
1239.8	0.04484	278.492	0.000307398
1240.75	0.0444	278.652	0.000281335
1241.72	0.04389	278.802	0.000260718
1242.68	0.04395	278.952	0.00026702
1243.63	0.04431	279.102	0.000288221
1244.6	0.04512	279.255	0.000272799
1245.56	0.04449	279.416	0.000261137
1246.55	0.04441	279.57	0.000250173
1247.51	0.04363	279.72	0.000279862
1248.47	0.04463	279.867	0.000276628
1249.43	0.04492	280.018	0.000262781
1250.39	0.04454	280.169	0.000222805
1251.36	0.0443	280.319	0.000297412
1252.32	0.04351	280.472	0.000254047
1253.28	0.04433	280.632	0.000260911
1254.24	0.04496	280.785	0.000245441
1255.2	0.04519	280.934	0.000284525
1256.17	0.04455	281.085	0.000236728
1257.12	0.04355	281.235	0.000282701
1258.08	0.04408	281.386	0.000211467
1259.05	0.04506	281.536	0.000265618
1260.01	0.04529	281.69	0.000272106
1260.97	0.04451	281.84	0.000230532
1261.96	0.04332	281.99	0.00028268
1262.92	0.04441	282.14	0.000275511
1263.88	0.04485	282.292	0.000259827
1264.84	0.04407	282.442	0.000258904
1265.8	0.04406	282.594	0.000241122
1266.76	0.04357	282.744	0.000286666
1267.72	0.04484	282.893	0.000238156
1268.68	0.04527	283.043	0.000254732
1269.64	0.04387	283.192	0.000233234
1270.6	0.04404	283.345	0.000308769
1271.56	0.04487	283.507	0.000253976
1272.52	0.0455	283.66	0.000269644
1273.48	0.04417	283.811	0.000236723
1274.45	0.04354	283.962	0.000257971
1275.41	0.04431	284.112	0.000250158
1276.37	0.04402	284.26	0.000217646
1277.36	0.04526	284.41	0.000282788
1278.32	0.04479	284.56	0.000222642
1279.28	0.04483	284.71	0.000321186
1280.24	0.0434	284.861	0.00019955
1281.2	0.04397	285.01	0.000244167
1282.16	0.04512	285.16	0.000248464
1283.12	0.04456	285.311	0.000239552
1284.09	0.04379	285.46	0.000269386
1285.05	0.04432	285.613	0.000266028
1286.01	0.04528	285.762	0.000257929
1286.97	0.0447	285.916	0.000153385
1287.93	0.04531	286.07	0.000317683
1288.89	0.04387	286.22	0.000410338
1289.85	0.04418	286.372	0.000110674
1290.81	0.04547	286.525	0.000189833
1291.77	0.04506	286.68	0.00042215
1292.77	0.04373	286.832	0.000261794
1293.73	0.0442	286.982	0.000327938
1294.69	0.0448	287.13	0.000264074
1295.65	0.04499	287.279	0.000337943
1296.61	0.04451	287.428	0.000259081
1297.57	0.04391	287.578	0.000304434
1298.53	0.04382	287.73	0.000278237
1299.49	0.04425	287.885	0.000356011
1300.45	0.04402	288.034	0.000238693
1301.41	0.04526	288.186	0.000311653
1302.37	0.04479	288.337	0.000256536
1303.34	0.04483	288.49	0.000326897
1304.3	0.04434	288.64	0.000257143
1305.26	0.04397	288.792	0.0003245
1306.22	0.04512	288.946	0.000299135
1307.18	0.04456	289.098	0.000247164
1308.17	0.04438	289.248	0.000274518
1309.13	0.04432	289.43	0.000276259
1310.09	0.04528	289.582	0.000316556
1311.06	0.0447	289.742	0.00022636
1312.02	0.04531	289.89	0.000272216
1312.98	0.04387	290.039	0.000257656
1313.94	0.04418	290.19	0.000311663
1314.9	0.04547	290.344	0.000241308
1315.86	0.04506	290.494	0.000307738
1316.82	0.04454	290.643	0.000254006
1317.78	0.0442	290.792	0.000288012
1318.74	0.0448	290.942	0.000240763
1319.71	0.04499	291.094	0.000251902
1320.67	0.04451	291.244	0.000262661
1321.63	0.04439	291.395	0.000274778
1322.59	0.04438	291.545	0.000261982
1323.58	0.04425	291.697	0.000259244
1324.54	0.04433	291.846	0.000295229
1325.5	0.04496	292	0.000269172
1326.46	0.04519	292.15	0.000248555
1327.42	0.04455	292.3	0.000254857
1328.38	0.04435	292.454	0.000276054
1329.34	0.04408	292.602	0.000260637
1330.3	0.04506	292.755	0.000248982
1331.27	0.04529	292.902	0.000238024
1332.23	0.04451	293.054	0.000267712
1333.19	0.04433	293.206	0.000264473
1334.15	0.04441	293.359	0.000250625
1335.12	0.04485	293.512	0.000210646
1336.08	0.04407	293.66	0.000285255
1337.04	0.04406	293.81	0.000241893
1338	0.04436	293.96	0.000248766
1338.99	0.04484	294.11	0.000233299
1339.95	0.04527	294.262	0.00027238
1340.91	0.04387	294.413	0.000224583
1341.87	0.04404	294.563	0.000270557
1342.83	0.04487	294.714	0.000199322
1343.79	0.0455	294.864	0.000253473
1344.76	0.04417	295.017	0.000259962
1345.71	0.04435	295.17	0.000218385
1346.67	0.04431	295.318	0.000270536
1347.64	0.04402	295.467	0.000263367
1348.6	0.04526	295.622	0.000247681
1349.56	0.04479	295.772	0.000246757
1350.52	0.04483	295.922	0.000228977
1351.48	0.04434	296.072	0.000274522
1352.44	0.04397	296.221	0.000226011
1353.44	0.04512	296.374	0.000242584
1354.43	0.04456	296.523	0.000221087
1355.39	0.04438	296.678	0.000296619
1356.36	0.04432	296.829	0.000241837
1357.32	0.04528	296.978	0.000257508
1358.28	0.0447	297.13	0.000224586
1359.24	0.04531	297.278	0.000245838
1360.2	0.04439	297.428	0.000238024
1361.16	0.04418	297.582	0.000205507
1362.13	0.04547	297.731	0.00027065
1363.09	0.04506	297.904	0.000210482
1364.05	0.04437	298.058	0.000309023
1365.01	0.0442	298.208	0.000187388
1365.97	0.0448	298.36	0.000232002
1366.93	0.04499	298.509	0.0002363
1367.89	0.04451	298.663	0.000227386
1368.85	0.04391	298.814	0.000257218
1369.85	0.04382	298.968	0.000253859
1370.8	0.04425	299.118	0.000244161
1371.77	0.04402	299.278	0.000236338
1372.73	0.04526	299.426	0.000203826
1373.68	0.04479	299.575	0.00026897
1374.65	0.04483	299.728	0.00020882
1375.61	0.04434	299.881	0.000307362
1376.57	0.04397	300.032	0.000185726
1377.53	0.04512	300.183	0.000230341
1378.5	0.04456	300.332	0.000203001
1379.46	0.04438	300.485	0.00026814
1380.42	0.04432	300.638	0.01142
1381.38	0.04528	300.79	0.01145
1382.34	0.0447	300.938	0.01144
1383.3	0.04531	301.092	0.01143
1384.26	0.04387	301.248	0.01143
1385.26	0.04418	301.4	0.01146
1386.22	0.04547	301.55	0.01144
1387.18	0.04506	301.7	0.01142
1388.15	0.04454	301.85	0.01143
1389.11	0.0442	302	0.01146
1390.07	0.0448	302.15	0.01144
1391.03	0.04499	302.3	0.01147
1391.99	0.04451	302.45	0.01142
1392.95	0.04439	302.599	0.01142
1393.91	0.04438	302.76	0.01142
1394.87	0.04425	302.908	0.01145
1395.83	0.04402	303.062	0.01142
1396.79	0.04526	303.212	0.0115
1397.75	0.04479	303.362	0.01146
1398.72	0.04483	303.512	0.01143
1399.68	0.04434	303.672	0.01145
1400.67	0.04397	303.825	0.0115
1401.64	0.04512	303.979	0.01149
1402.6	0.04456	304.133	0.01153
1403.56	0.04438	304.286	0.01146
1404.52	0.04432	304.473	0.01147
1405.49	0.04528	304.622	0.0115
1406.45	0.0447	304.772	0.01151
1407.41	0.04531	304.922	0.01148
1408.37	0.04387	305.072	0.0115
1409.34	0.04418	305.222	0.01149
1410.29	0.04547	305.375	0.01149
1411.25	0.04506	305.525	0.01153
1412.21	0.04454	305.675	0.01154
1413.17	0.0442	305.823	0.01153
1414.13	0.0448	305.972	0.01153
1415.09	0.04499	306.122	0.01148
1416.09	0.04451	306.272	0.01152
1417.05	0.04439	306.422	0.01151
1418.01	0.04438	306.575	0.01155
1418.97	0.04425	306.728	0.01157
1419.93	0.04433	306.882	0.01154
1420.89	0.04496	307.032	0.01153
1421.85	0.04519	307.18	0.01152
1422.82	0.04455	307.33	0.01155
1423.78	0.04435	307.48	0.01154
1424.74	0.04408	307.63	0.01155
1425.7	0.04506	307.78	0.01149
1426.66	0.04529	307.932	0.01156
1427.62	0.04451	308.082	0.01161
1428.58	0.04433	308.236	0.01159
1429.54	0.04441	308.385	0.01159
1430.5	0.04485	308.547	0.01159
1431.5	0.04407	308.7	0.01158
1432.46	0.04406	308.85	0.01161
1433.42	0.04436	309	0.01159
1434.38	0.04484	309.15	0.01164
1435.35	0.04527	309.304	0.01159
1436.31	0.04387	309.455	0.01158
1437.27	0.04404	309.608	0.01158
1438.22	0.04487	309.757	0.01157
1439.19	0.0455	309.908	0.0116
1440.15	0.04417	310.06	0.0116
1441.11	0.04435	310.215	0.01162
1442.06	0.04431	310.37	0.0116
1443.03	0.04402	310.524	0.0116
1443.99	0.04526	310.675	0.01164
1444.94	0.04479	310.825	0.01166
1445.91	0.04483	310.976	0.01159
1446.9	0.04434	311.125	0.0116
1447.87	0.04397	311.283	0.0116
1448.83	0.04512	311.433	0.01165
1449.79	0.04456	311.584	0.01164
1450.75	0.04438	311.734	0.01163
1451.71	0.04432	311.884	0.01158
1452.67	0.04528	312.034	0.01165
1453.63	0.0447	312.184	0.01167
1454.6	0.04531	312.338	0.01161
1455.56	0.04439	312.488	0.01161
1456.52	0.04418	312.638	0.01168
1457.48	0.04547	312.788	0.01166
1458.44	0.04506	312.94	0.01162
1459.4	0.04437	313.09	0.01166
1460.36	0.0442	313.24	0.01161
1461.33	0.0448	313.39	0.01164
1462.32	0.04499	313.54	0.01165
1463.28	0.04451	313.69	0.01169
1464.25	0.04391	313.844	0.01167
1465.21	0.04382	314.005	0.01166
1466.17	0.04425	314.158	0.01163
1467.13	0.04402	314.308	0.01168
1468.1	0.04526	314.458	0.01172
1469.06	0.04479	314.608	0.01164
1470.02	0.04483	314.758	0.01167
1470.99	0.04434	314.91	0.01168
1471.95	0.04397	315.06	0.01164
1472.91	0.04512	315.211	0.01171
1473.88	0.04456	315.366	0.01169
1474.83	0.04438	315.517	0.01164
1475.8	0.04432	315.668	0.01163
1476.76	0.04528	315.818	0.01169
1477.75	0.0447	315.972	0.01171
1478.72	0.04531	316.122	0.01169
1479.68	0.04387	316.276	0.01168
1480.64	0.04418	316.431	0.01166
1481.6	0.04547	316.585	0.01166
1482.56	0.04506	316.735	0.0117
1483.53	0.04454	316.886	0.01168
1484.49	0.0442	317.037	0.01167
1485.45	0.0448	317.19	0.01169
1486.41	0.04499	317.344	0.01172
1487.38	0.04451	317.495	0.01171
1488.34	0.04439	317.645	0.01173
1489.3	0.04438	317.795	0.01169
1490.27	0.04425	317.947	0.01171
1491.23	0.04432	318.097	0.01172
1492.19	0.04528	318.248	0.01175
1493.19	0.0447	318.398	0.0117
1494.15	0.04531	318.55	0.01171
1495.11	0.04387	318.7	0.01171
1496.07	0.04418	318.85	0.01173
1497.03	0.04547	319	0.01174
1497.99	0.04506	319.15	0.01172
1498.95	0.04454	319.302	0.01171
1499.92	0.0442	319.455	0.01169
1500.88	0.0448	319.64	0.01172
1501.85	0.04499	319.795	0.01173
1502.81	0.04451	319.944	0.01174
1503.77	0.04439	320.092	0.01175
1504.73	0.04438	320.248	0.0117
1505.69	0.04425	320.397	0.01174
1506.65	0.01687	320.547	0.01173
1507.62	0.01079	320.702	0.01174
1508.61	0.00789	320.852	0.01176
1509.57	0.00728	321.002	0.01174
1510.54	0.00769	321.152	0.0117
1511.5	0.0056	321.302	0.01173
1512.46	0.00518	321.456	0.01174
1513.42	0.0058	321.605	0.01174
1514.38	0.00539	321.761	0.01173
1515.34	0.00375	321.922	0.01174
1516.3	0.00439	322.074	0.01172
1517.27	0.00463	322.228	0.01177
1518.22	0.00498	322.38	0.01176
1519.19	0.00376	322.53	0.0117
1520.15	0.0033	322.68	0.01177
1521.11	0.00392	322.83	0.01177
1522.07	0.0041	322.98	0.01172
1523.04	0.00288	323.133	0.01174
1524.03	0.00235	323.286	0.01176
1525	0.00246	323.436	0.01174
1525.96	0.00363	323.587	0.01174
1526.92	0.00409	323.742	0.01178
1527.88	0.00345	323.892	0.01177
1528.85	0.00262	324.042	0.01176
1529.81	0.0018	324.192	0.01176
1530.77	0.00297	324.342	0.01173
1531.73	0.00303	324.494	0.0118
1532.7	0.00274	324.644	0.01176
1533.66	0.00222	324.793	0.01178
1534.62	0.00184	324.944	0.01177
1535.58	0.00246	325.097	0.01176
1536.54	0.00335	325.25	0.01173
1537.5	0.00336	325.4	0.01177
1538.46	0.00308	325.55	0.01177
1539.46	0.00227	325.703	0.01179
1540.42	0.00124	325.855	0.01178
1541.38	0.00258	326.007	0.01177
1542.35	0.00325	326.158	0.01178
1543.31	0.00319	326.31	0.01175
1544.27	0.00254	326.46	0.01177
1545.23	0.00277	326.612	0.01177
1546.19	0.00209	326.765	0.01178
1547.15	0.00107	326.918	0.01178
1548.12	0.00166	327.069	0.01177
1549.08	0.00264	327.22	0.01178
1550.04	0.00295	327.372	0.01177
1551	0.0027	327.522	0.01181
1551.96	0.0021	327.672	0.01179
1552.92	0.00172	327.822	0.01176
1553.89	0.00236	327.971	0.01177
1554.88	0.00274	328.122	0.01178
1555.84	0.00139	328.274	0.01175
1556.81	0.00197	328.428	0.01179
1557.77	0.00191	328.577	0.01175
1558.73	0.00285	328.732	0.01182
1559.69	0.00268	328.882	0.01181
1560.66	0.00224	329.032	0.01179
1561.62	0.00189	329.182	0.01177
1562.58	0.00144	329.334	0.01181
1563.54	0.00209	329.482	0.01182
1564.51	0.00257	329.632	0.01179
1565.47	0.00221	329.782	0.01179
1566.43	0.00178	329.937	0.01179
1567.39	0.0016	330.092	0.01181
1568.35	0.00227	330.242	0.01179
1569.32	0.00248	330.391	0.01177
1570.31	0.00215	330.545	0.0118
1571.27	0.00102	330.695	0.01184
1572.24	0.00169	330.85	0.0118
1573.2	0.00224	331.003	0.01177
1574.16	0.0018	331.155	0.01184
1575.13	0.00161	331.305	0.0118
1576.09	0.0021	331.455	0.0118
1577.05	0.00248	331.608	0.0118
1578.01	0.00208	331.761	0.01181
1578.97	0.0019	331.912	0.01181
1579.94	0.00178	332.066	0.01182
1580.9	0.00226	332.217	0.01183
1581.86	0.00256	332.368	0.01184
1582.82	0.00217	332.518	0.01183
1583.78	0.00156	332.669	0.01182
1584.74	0.00146	332.822	0.01184
1585.74	0.00151	332.972	0.01181
1586.7	0.00138	333.127	0.01179
1587.66	0.00194	333.277	0.01183
1588.63	0.00221	333.427	0.01183
1589.59	0.00215	333.582	0.01181
1590.55	0.00186	333.732	0.01182
1591.52	0.00146	333.884	0.0118
1592.48	0.00187	334.034	0.01182
1593.44	0.00163	334.184	0.01184
1594.4	0.002	334.333	0.01183
1595.37	0.00147	334.484	0.01185
1596.33	0.0021	334.636	0.01182
1597.29	0.00189	334.824	0.0118
1598.25	0.00144	334.985	0.01186
1599.21	0.00211	335.135	0.01183
1600.18	0.00145	335.29	0.01184
1601.17	0.00149	335.444	0.01182
1602.13	0.00206	335.598	0.01183
1603.1	0.0017	335.748	0.01182
1604.06	0.00195	335.898	0.01185
1605.02	0.00204	336.048	0.01184
1605.98	0.00154	336.198	0.01184
1606.94	0.00125	336.348	0.01182
1607.91	0.00176	336.502	0.01186
1608.87	0.00165	336.652	0.01185
1609.83	0.00134	336.807	0.01184
1610.79	0.000937517	336.962	0.01185
1611.76	0.000848747	337.114	0.01182
1612.72	0.00133	337.27	0.01185
1613.68	0.00227	337.424	0.01185
1614.64	0.00229	337.578	0.01181
1615.6	0.00224	337.73	0.01186
1616.59	0.00282	337.88	0.01183
1617.56	0.00279	338.03	0.01183
1618.52	0.00213	338.18	0.01186
1619.48	0.00135	338.328	0.01187
1620.44	0.00124	338.478	0.01184
1621.4	0.00229	338.632	0.01187
1622.37	0.00254	338.782	0.01183
1623.33	0.00137	338.937	0.01184
1624.29	0.00112	339.089	0.01187
1625.26	0.00090757	339.242	0.01184
1626.22	0.00209	339.404	0.01186
1627.18	0.00222	339.554	0.01182
1628.14	0.00227	339.717	0.01184
1629.1	0.00143	339.872	0.01183
1630.07	0.00137	340.023	0.01184
1631.03	0.0023	340.176	0.01184
1632.03	0.00169	340.328	0.01183
1632.99	0.00184	340.482	0.01187
1633.95	0.00153	340.633	0.01186
1634.91	0.00102	340.782	0.01185
1635.88	0.00158	340.938	0.01183
1636.84	0.00235	341.1	0.01186
1637.8	0.00203	341.25	0.01183
1638.76	0.00207	341.403	0.01185
1639.72	-0.000183731	341.554	0.01187
1640.68	0.00129	341.704	0.01184
1641.64	0.0014	341.855	0.01186
1642.61	0.00207	342.005	0.01187
1643.57	0.00201	342.155	0.01184
1644.53	0.00229	342.305	0.01187
1645.49	0.00202	342.46	0.01186
1646.45	0.00168	342.61	0.01184
1647.45	0.00161	342.761	0.01186
1648.41	0.00116	342.912	0.01188
1649.38	0.0019	343.062	0.01187
1650.34	0.0022	343.212	0.01187
1651.3	0.00201	343.362	0.01188
1652.26	0.00205	343.512	0.01182
1653.22	0.00198	343.664	0.01185
1654.18	0.00111	343.818	0.01188
1655.14	0.00109	343.98	0.01186
1656.1	0.000993049	344.134	0.01183
1657.06	0.00233	344.284	0.01185
1658.03	0.00261	344.438	0.01188
1658.99	0.00151	344.59	0.01187
1659.95	0.000688136	344.74	0.01187
1660.92	0.00106	344.894	0.01187
1661.88	0.00221	345.044	0.01189
1662.87	0.0024	345.196	0.01186
1663.84	0.00102	345.348	0.01187
1664.8	0.000945989	345.498	0.01184
1665.77	0.00138	345.648	0.01186
1666.73	0.0026	345.8	0.01188
1667.69	0.0021	345.95	0.01185
1668.65	0.00243	346.1	0.01189
1669.62	0.00235	346.25	0.01189
1670.58	0.00155	346.4	0.01187
1671.54	0.000242577	346.55	0.01189
1672.51	0.00092929	346.703	0.01187
1673.47	0.000470812	346.856	0.01186
1674.43	0.00179	347.005	0.01185
1675.39	0.00128	347.157	0.01188
1676.35	0.00199	347.312	0.0119
1677.31	0.00177	347.463	0.01188
1678.31	0.00189	347.613	0.0119
1679.27	0.00138	347.765	0.0119
1680.23	0.000918064	347.916	0.0119
1681.2	0.00134	348.07	0.01189
1682.16	0.0022	348.22	0.01188
1683.12	0.0017	348.374	0.0119
1684.08	0.00155	348.524	0.01188
1685.04	0.000823792	348.675	0.01189
1686.01	0.000909922	348.825	0.01187
1686.97	0.00148	348.976	0.01188
1687.93	0.00158	349.13	0.01188
1688.89	0.00156	349.28	0.01189
1689.86	0.00121	349.436	0.01188
1690.82	0.000914327	349.588	0.01186
1691.78	0.00123	349.775	0.01189
1692.74	0.00196	349.964	0.01186
1693.74	0.00207	350.12	0.01189
1694.7	0.00102	350.27	0.01189
1695.67	0.0012	350.419	0.01189
1696.63	0.00154	350.57	0.01189
1697.6	0.00164	350.72	0.01191
1698.56	0.00157	350.87	0.01186
1699.53	0.0011	351.02	0.01188
1700.49	0.00132	351.174	0.01191
1701.45	0.0015	351.325	0.01193
1702.42	0.00192	351.48	0.01191
1703.38	0.00191	351.63	0.0119
1704.34	0.00178	351.782	0.01191
1705.3	0.00159	351.933	0.01188
1706.26	0.00071043	352.082	0.01186
1707.23	0.00108	352.232	0.01188
1708.19	0.000949673	352.387	0.01188
1709.19	0.00121	352.548	0.0119
1710.15	0.00131	352.7	0.01192
1711.11	0.00152	352.855	0.01192
1712.08	0.00128	353.008	0.01191
1713.04	0.00129	353.16	0.01189
1714	0.00155	353.312	0.0119
1714.96	0.00114	353.465	0.01188
1715.92	0.000982979	353.618	0.01188
1716.88	0.00138	353.77	0.01191
1717.85	0.00192	353.92	0.01187
1718.81	0.00216	354.072	0.01189
1719.77	0.00135	354.224	0.01191
1720.73	0.000567103	354.378	0.01191
1721.69	0.00139	354.526	0.0119
1722.66	0.00237	354.678	0.01191
1723.62	0.00164	354.829	0.01192
1724.62	0.000328395	354.983	0.01189
1725.58	0.000726424	355.135	0.01191
1726.55	0.00168	355.286	0.01192
1727.51	0.00231	355.437	0.01188
1728.47	0.00168	355.59	0.0119
1729.43	0.0012	355.744	0.01192
1730.39	0.000369369	355.898	0.01188
1731.36	0.00102	356.05	0.01189
1732.33	0.00226	356.2	0.01191
1733.29	0.00162	356.354	0.01189
1734.25	0.00106	356.504	0.01191
1735.21	0.000779918	356.655	0.0119
1736.18	0.00111	356.807	0.01192
1737.14	0.00147	356.97	0.01189
1738.11	0.00191	357.12	0.01188
1739.07	0.00196	357.276	0.01191
1740.07	0.00131	357.427	0.01192
1741.03	0.000919732	357.582	0.01188
1742	0.00107	357.732	0.0119
1742.96	0.00102	357.886	0.01192
1743.92	0.000822901	358.04	0.01189
1744.88	0.00157	358.191	0.0119
1745.85	0.00177	358.355	0.0119
1746.81	0.00194	358.506	0.01189
1747.77	0.00122	358.659	0.01191
1748.74	0.00144	358.814	0.01193
1749.7	0.000712763	358.965	0.01192
1750.66	0.00196	359.12	0.01192
1751.62	0.00134	359.272	0.0119
1752.59	0.00222	359.423	0.01192
1753.55	0.00211	359.575	0.01192
1754.51	0.000744468	359.725	0.0119
1755.51	0.00159	359.877	0.0119
1756.47	0.00191	360.027	0.01191
1757.43	0.00199	360.183	0.01192
1758.39	0.001	360.332	0.01189
1759.36	0.00141	360.482	0.01191
1760.32	0.00146	360.634	0.01191
1761.28	0.00159	360.785	0.01188
1762.24	0.00223	360.937	0.01193
1763.2	0.00172	361.087	0.0119
1764.17	0.00104	361.242	0.01192
1765.13	0.000909892	361.394	0.01194
1766.09	0.00221	361.544	0.01193
1767.05	0.00216	361.694	0.01192
1768.02	0.00194	361.848	0.01195
1768.98	0.0017	362.001	0.01193
1769.94	0.000998896	362.157	0.01191
1770.94	0.00156	362.308	0.01189
1771.9	0.00198	362.458	0.01191
1772.86	0.00203	362.608	0.01191
1773.82	0.000865924	362.758	0.01191
1774.78	0.00161	362.908	0.01193
1775.75	0.00232	363.06	0.01193
1776.71	0.00169	363.21	0.01192
1777.67	0.000630955	363.372	0.01192
1778.64	0.000540685	363.522	0.01192
1779.6	0.00196	363.685	0.01192
1780.56	0.00193	363.836	0.01194
1781.53	0.00169	363.988	0.01193
1782.49	0.00243	364.14	0.01194
1783.45	0.00215	364.29	0.01195
1784.42	0.00203	364.44	0.01192
1785.38	0.000787817	364.592	0.01193
1786.37	0.00108	364.745	0.01196
1787.33	0.00136	364.898	0.01193
1788.3	0.00162	365.082	0.01193
1789.26	0.00187	365.246	0.0119
1790.22	0.00229	365.398	0.01193
1791.18	0.00156	365.552	0.01195
1792.15	0.000809401	365.705	0.01195
1793.11	0.000904306	365.856	0.01196
1794.07	0.00146	366.006	0.01193
1795.03	0.000700161	366.16	0.01191
1796	0.00171	366.312	0.01194
1796.96	0.00171	366.462	0.01191
1797.93	0.00194	366.617	0.01191
1798.89	0.00164	366.768	0.01194
1799.85	0.00113	366.92	0.01192
1800.82	0.000713371	367.072	0.01194
1801.81	0.000131184	367.224	0.01192
1802.78	0.000876814	367.376	0.01193
1803.74	0.00137	367.525	0.01193
1804.71	0.00209	367.678	0.01196
1805.67	0.00201	367.833	0.01194
1806.63	0.000821637	367.985	0.01193
1807.59	0.00106	368.135	0.01193
1808.55	0.00198	368.286	0.01194
1809.52	0.00214	368.439	0.01189
1810.48	0.00244	368.589	0.01194
1811.44	0.00179	368.744	0.01195
1812.4	0.00219	368.895	0.01195
1813.37	0.00106	369.045	0.01196
1814.33	0.000589915	369.208	0.01195
1815.29	0.0018	369.36	0.01197
1816.26	0.00247	369.51	0.01196
1817.26	0.00206	369.662	0.01194
1818.22	0.00159	369.812	0.01196
1819.18	0.000722152	369.968	0.01199
1820.14	0.000773961	370.117	0.01193
1821.11	0.000473686	370.268	0.01195
1822.07	0.000318712	370.424	0.01197
1823.03	0.00138	370.574	0.01195
1824	0.000543255	370.728	0.01195
1824.96	0.00224	370.882	0.01194
1825.93	0.00189	371.034	0.01192
1826.89	0.00154	371.186	0.01193
1827.86	0.00063897	371.337	0.01194
1828.82	0.00108	371.488	0.01194
1829.79	0.00134	371.653	0.01196
1830.75	0.000736499	371.805	0.01195
1831.71	0.00184	371.962	0.01193
1832.71	0.00241	372.116	0.01194
1833.67	0.00135	372.267	0.01195
1834.63	0.0022	372.422	0.01193
1835.59	0.000729836	372.572	0.01194
1836.56	0.000734661	372.722	0.01195
1837.52	0.00104	372.875	0.01195
1838.49	0.00241	373.03	0.01192
1839.45	0.0017	373.18	0.01194
1840.41	0.00065058	373.332	0.01192
1841.38	0.000527102	373.482	0.01191
1842.34	0.000551032	373.632	0.01194
1843.3	0.00183	373.785	0.01191
1844.27	0.0022	373.937	0.01195
1845.23	0.00202	374.087	0.01195
1846.19	0.00101	374.238	0.01191
1847.15	0.000582532	374.39	0.01195
1848.15	-0.00117	374.54	0.01194
1849.11	0.00137	374.692	0.01193
1850.08	0.00153	374.844	0.01195
1851.04	0.00136	375	0.01194
1852.01	0.00246	375.152	0.01193
1852.97	0.00227	375.304	0.0119
1853.94	0.00157	375.455	0.01192
1854.9	0.00177	375.608	0.01196
1855.87	0.000933439	375.76	0.01195
1856.83	0.000501073	375.91	0.01194
1857.79	0.00145	376.062	0.01194
1858.76	0.00205	376.215	0.01194
1859.72	0.00249	376.365	0.01195
1860.68	0.00159	376.517	0.01194
1861.64	0.00104	376.672	0.01193
1862.61	0.000494499	376.837	0.01192
1863.61	0.00101	376.99	0.01194
1864.57	0.00157	377.144	0.01195
1865.53	0.00202	377.298	0.01196
1866.5	0.00164	377.45	0.01193
1867.46	0.000885427	377.602	0.01196
1868.42	0.00171	377.758	0.01191
1869.39	0.00117	377.907	0.01195
1870.35	0.0006856	378.06	0.01194
1871.31	0.000797026	378.212	0.01192
1872.28	0.00217	378.368	0.01194
1873.25	0.00216	378.518	0.01193
1874.21	0.00227	378.675	0.01194
1875.17	0.00218	378.828	0.01193
1876.14	0.00149	378.978	0.01197
1877.1	0.00117	379.132	0.01193
1878.07	0.000536357	379.283	0.01194
1879.06	0.00123	379.434	0.01194
1880.03	0.00182	379.585	0.01195
1880.99	0.00188	379.736	0.01194
1881.96	0.00101	379.89	0.01191
1882.92	0.000690602	380.045	0.01193
1883.89	0.00078462	380.23	0.01187
1884.86	0.000788745	380.381	0.01194
1885.82	0.000218455	380.534	0.01197
1886.79	0.00101	380.688	0.01196
1887.75	0.000650898	380.84	0.01196
1888.71	0.00139	380.992	0.01197
1889.67	0.00209	381.143	0.01193
1890.64	0.00155	381.294	0.01195
1891.6	0.00178	381.444	0.01196
1892.56	0.00261	381.599	0.01193
1893.53	0.00167	381.762	0.01195
1894.53	0.000793621	381.916	0.01195
1895.49	0.000221446	382.08	0.01193
1896.45	0.000343168	382.23	0.01193
1897.42	0.000727794	382.381	0.01193
1898.38	0.00186	382.532	0.0119
1899.34	0.00257	382.684	0.01194
1900.31	0.00248	382.84	0.0119
1901.27	0.00237	382.992	0.01197
1902.23	0.00143	383.154	0.01195
1903.19	0.000387352	383.305	0.01193
1904.16	0.000593678	383.46	0.01194
1905.12	0.00168	383.61	0.01193
1906.08	0.00106	383.763	0.01193
1907.04	0.00158	383.918	0.0119
1908	0.00231	384.068	0.01193
1908.96	0.00147	384.222	0.01197
1909.96	7.34956e-05	384.376	0.01198
1910.92	0.000324625	384.528	0.01198
1911.88	0.000635859	384.677	0.01195
1912.85	0.00265	384.828	0.01197
1913.81	0.0014	384.982	0.01197
1914.77	0.00113	385.134	0.01194
1915.74	0.00121	385.29	0.01194
1916.7	0.00204	385.444	0.01197
1917.66	0.00226	385.598	0.01193
1918.63	0.00161	385.752	0.01196
1919.59	0.000932132	385.902	0.01197
1920.55	9.82615e-05	386.055	0.01195
1921.51	0.000977591	386.218	0.01197
1922.47	0.00128	386.37	0.01196
1923.43	0.00258	386.523	0.01195
[truncated: 619 more rows]
